# Supplementary material for: Gene Expression-Based Classifiers Identify Staphylococcus aureus Infection in Mice and Humans
Source: PLoS One. 2013 Jan 9;8(1):e48979. doi: 10.1371/journal.pone.0048979 (PMC3541361; doi:10.1371/journal.pone.0048979)
Supplement: Table S1 — Probes, ranked by p-value, that were differentially expressed (after Bonferroni correction) in mice with S. aureus infection vs. Healthy controls; S. aureus vs. E. coli infection; and E. coli vs. Healthy controls. Also presented is the average probe expression in each comparator group and the fold-change within the pairwise comparison. (XLSX) [file pone.0048979.s009.xlsx]

## Sheet: Table S1
Table S1. Probes, ranked by p-value, that were differentially expressed (after Bonferroni correction) in mice with S. aureus infection vs. Healthy controls; S. aureus vs. E. coli infection; and E. coli vs. Healthy controls. Also presented is the average probe expression in each comparator group and the fold-change within the pairwise comparison.
S. AUREUS VS. HEALTHY CONTROLS						S. AUREUS VS. E. COLI						E. COLI VS. HEALTHY CONTROLS
Probe ID	P-value	Average S. aureus Expression	Average Healthy Expression	Fold change		Probe ID	P-value	Average S. aureus Expression	Average E. coli Expression	Fold change		Probe ID	P-value	Average E. coli Expression	Average Healthy Expression	Fold change
1449366_at	3.25276e-68	7.88736	7.92607	-0.038709		1448231_at	9.0603e-37	5.40428	5.48554	-0.0812678		1424254_at	6.95284e-37	10.6258	10.6533	-0.0274501
1455899_x_at	1.0588e-63	7.7882	7.9221	-0.133895		1416125_at	5.98922e-36	9.40456	8.8368	0.567761		1427747_a_at	1.23704e-36	6.11696	5.9722	0.144757
1456212_x_at	1.8886e-63	3.9956	4.02695	-0.0313499		1418932_at	6.70039e-36	12.0851	12.1589	-0.0738407		1448756_at	1.31679e-31	9.13202	9.00649	0.125535
1427747_a_at	1.90292e-63	4.96783	5.07738	-0.109548		1449322_at	1.06552e-35	6.65788	6.73568	-0.0777989		1442339_at	1.0156e-30	4.72694	4.70433	0.0226082
1419132_at	3.38695e-62	8.62952	8.41426	0.215259		1416442_at	3.52926e-35	3.88612	3.80522	0.0808997		1422953_at	5.83932e-30	9.26089	8.95505	0.305839
1448756_at	2.92502e-60	5.12722	5.10873	0.0184855		1416467_at	7.5167e-34	3.92167	3.92714	-0.00546771		1434046_at	1.51574e-27	7.17651	7.05844	0.118076
1416576_at	1.73585e-58	6.51828	6.48641	0.0318671		1449027_at	8.96405e-34	5.52017	5.66651	-0.146348		1448871_at	2.31476e-27	3.53085	3.423	0.107845
1422953_at	2.81627e-58	8.03748	8.24203	-0.204544		1433634_at	4.2713e-33	4.08479	4.01303	0.0717579		1419394_s_at	2.87919e-27	5.94955	6.00024	-0.0506892
1420330_at	2.17135e-57	8.91695	8.52911	0.387833		1420867_at	8.47696e-32	10.5242	9.55775	0.966478		1425951_a_at	1.61309e-26	7.39626	7.5317	-0.135448
1437056_x_at	6.70095e-57	5.20175	5.18599	0.0157507		1428301_at	3.42866e-31	5.96136	6.03588	-0.0745234		1417460_at	2.81689e-26	7.48513	7.74942	-0.264288
1419647_a_at	1.78025e-56	5.94341	6.1907	-0.247293		1449851_at	5.12445e-31	5.21532	5.5677	-0.352375		1427102_at	3.43513e-26	7.26394	7.38354	-0.119602
1434758_at	3.71863e-56	8.29612	5.8037	2.49242		1452731_x_at	6.92573e-31	5.13263	4.87768	0.254946		1460271_at	4.42549e-26	13.1299	13.0713	0.0586456
1418133_at	2.53983e-55	7.66528	7.59933	0.0659481		1420607_at	9.97005e-31	8.48864	8.2813	0.207335		1442804_at	6.252e-26	8.27875	7.48135	0.797407
1450808_at	2.99659e-55	3.79906	3.72471	0.0743576		1423168_at	1.18853e-30	5.62816	5.5861	0.0420649		1460283_at	1.40725e-25	8.4546	8.46033	-0.00572098
1437247_at	1.41206e-54	8.94959	8.88724	0.0623538		1417065_at	2.33293e-30	9.22193	8.87728	0.344643		1427381_at	2.89447e-25	4.10274	3.93507	0.167669
1420331_at	1.87389e-53	12.14	12.5907	-0.450715		1427844_a_at	6.16293e-30	7.30831	7.28508	0.0232325		1452922_at	3.56408e-25	6.61361	6.61052	0.00309089
1450350_a_at	6.37562e-53	5.90428	5.0219	0.882375		1450350_a_at	1.29803e-29	5.04005	5.15511	-0.115061		1436618_at	7.92522e-25	7.32212	7.11909	0.203033
1419394_s_at	6.58383e-53	8.09634	7.50973	0.586611		1438767_at	3.59948e-29	4.81711	4.67848	0.138628		1423754_at	9.88493e-25	8.18642	8.32764	-0.141227
1437060_at	3.25915e-51	2.39932	2.39022	0.00910618		1448728_a_at	3.68104e-29	4.74436	4.82951	-0.0851559		1449005_at	1.2855e-24	8.03261	7.83566	0.196943
1419609_at	8.37055e-51	8.04832	7.74137	0.306951		1446018_at	4.54405e-29	5.00926	4.61842	0.390834		1455899_x_at	2.54908e-24	2.94956	2.90011	0.0494527
1447284_at	1.27743e-50	9.62589	9.10334	0.52255		1419734_at	4.804e-29	7.95674	7.70638	0.250359		1428749_at	3.33863e-24	6.14976	6.09013	0.0596315
1449984_at	1.33481e-50	6.54423	6.77542	-0.231195		1429554_at	7.09866e-29	7.13859	6.8127	0.325891		1440865_at	3.78598e-24	5.37064	5.5341	-0.163458
1418932_at	1.69242e-50	6.76537	6.11139	0.653974		1441391_at	1.34204e-28	2.6876	2.58332	0.104276		1444090_at	7.32767e-24	7.79971	7.79667	0.0030448
1460458_at	8.79598e-50	6.6538	4.78829	1.86552		1449984_at	2.25146e-28	7.06253	6.18272	0.879807		1456212_x_at	1.00176e-23	7.39227	7.46531	-0.0730392
1437226_x_at	1.14128e-49	6.94625	7.05738	-0.11113		1430148_at	3.593e-28	3.25604	3.37187	-0.11583		1437514_at	1.06044e-23	4.46148	4.54568	-0.0842011
1421375_a_at	1.19371e-49	6.6627	6.55576	0.106944		1436594_at	7.55317e-28	7.68907	7.34203	0.347036		1448562_at	1.21667e-23	8.77908	8.8267	-0.0476178
1425951_a_at	1.46383e-49	5.79089	5.65139	0.139502		1420818_at	9.53758e-28	5.36477	4.75038	0.614396		1421375_a_at	2.22152e-23	6.86272	6.88312	-0.0204072
1430612_at	1.81553e-49	4.08503	4.05949	0.0255338		1460510_a_at	9.81198e-28	5.27003	5.14816	0.121871		1419627_s_at	2.40806e-23	9.61964	10.1159	-0.496275
1415922_s_at	1.91381e-49	6.634	6.72816	-0.0941664		1424141_at	1.28664e-27	8.01612	8.32381	-0.307688		1427994_at	2.99446e-23	6.90276	6.96898	-0.0662186
1419532_at	6.82724e-48	8.61548	8.4253	0.190187		1424638_at	2.1345e-27	6.08555	5.86687	0.218677		1447284_at	4.5692e-23	6.71997	6.86873	-0.148757
1439902_at	7.9834e-48	7.65902	7.77738	-0.118367		1418972_at	2.87088e-27	9.82449	9.89566	-0.0711749		1451858_at	1.30619e-22	6.14539	6.18039	-0.0349937
1425895_a_at	1.11926e-47	8.38893	8.18277	0.206157		1448200_at	3.01606e-27	10.3696	10.5636	-0.193932		1438934_x_at	1.6843e-22	11.0565	11.3638	-0.307294
1420394_s_at	1.21817e-47	5.62944	5.68765	-0.0582067		1448830_at	3.28673e-27	5.11428	5.14796	-0.0336799		1419709_at	2.4409e-22	9.97059	10.0875	-0.116878
1455660_at	3.70379e-47	5.5248	5.56336	-0.0385613		1433916_at	4.31051e-27	7.99592	7.94	0.0559239		1427327_at	2.71665e-22	7.70397	7.62615	0.0778193
1416871_at	4.35547e-47	4.25566	4.34156	-0.0858942		1425881_at	6.36459e-27	5.33396	5.37229	-0.0383255		1451537_at	3.57054e-22	4.62458	4.73075	-0.106167
1451537_at	1.31335e-46	7.45501	7.50292	-0.0479095		1421679_a_at	6.47021e-27	6.80018	6.36431	0.43587		1456028_x_at	5.20454e-22	4.72993	4.71584	0.0140913
1417268_at	1.76547e-46	3.44512	3.40829	0.036832		1444207_at	6.76982e-27	3.37722	3.47997	-0.102743		1418747_at	9.2284e-22	4.2578	4.31754	-0.059737
1449027_at	3.55318e-46	7.1083	7.24112	-0.132816		1458067_at	7.49433e-27	3.82055	3.78907	0.0314831		1450808_at	1.82539e-21	9.15449	8.96741	0.187082
1419272_at	5.69579e-46	5.14363	4.96288	0.180747		1416268_at	8.9665e-27	12.736	12.9416	-0.205631		1416298_at	2.00222e-21	8.16673	8.02772	0.139008
1423233_at	6.44577e-46	8.18554	8.26205	-0.0765074		1438148_at	1.17312e-26	7.5075	7.43629	0.0712038		1418580_at	2.34809e-21	8.65117	8.89322	-0.242042
1420697_at	8.39074e-46	9.47172	8.83928	0.632436		1426358_at	1.18937e-26	4.94272	4.84518	0.0975414		1460282_at	2.83801e-21	2.86911	2.73687	0.132245
1418901_at	1.17779e-45	7.86243	7.58417	0.27826		1419998_at	1.2289e-26	3.94091	3.96571	-0.0248027		1456135_s_at	3.859e-21	7.04819	6.99708	0.0511138
1415899_at	1.21336e-45	5.85354	5.91361	-0.0600645		1439870_at	1.32366e-26	5.3267	5.31981	0.00689611		1428572_at	4.32416e-21	8.26024	8.21751	0.0427314
1427844_a_at	1.31706e-44	5.44669	5.47333	-0.0266428		1438620_x_at	1.37885e-26	7.57749	7.56683	0.0106606		1420394_s_at	5.46186e-21	9.03354	8.79476	0.238781
1421326_at	2.31305e-44	11.1052	11.1489	-0.0437785		1423100_at	1.66035e-26	7.51687	5.62194	1.89493		1419091_a_at	8.67101e-21	5.45219	5.52247	-0.070279
1419610_at	4.42743e-44	7.0193	6.65093	0.368371		1459444_at	2.74135e-26	5.44279	5.19996	0.242825		1450513_at	9.37651e-21	5.8883	6.08089	-0.192591
1457676_at	5.20112e-44	3.818	4.13867	-0.320668		1423662_at	2.9086e-26	6.72919	6.47011	0.25908		1456250_x_at	1.21172e-20	8.4052	8.24315	0.162054
1416268_at	5.24037e-44	7.89553	7.85635	0.0391775		1423596_at	4.07945e-26	5.42889	5.33156	0.097323		1456223_at	1.33537e-20	7.86242	7.89738	-0.0349592
1419627_s_at	5.913e-44	6.65643	6.82584	-0.169415		1415899_at	5.28758e-26	9.2614	8.93737	0.324032		1444122_at	1.38284e-20	6.43611	6.51945	-0.0833373
1424509_at	6.78811e-44	7.75054	7.54365	0.206891		1422879_at	6.04654e-26	7.30369	6.98236	0.321326		1420697_at	1.64767e-20	6.99355	7.6239	-0.630341
1418722_at	2.15879e-43	8.60046	8.72081	-0.120354		1440557_at	7.43516e-26	5.68236	5.76906	-0.0866953		1436530_at	1.67903e-20	11.1516	11.023	0.128603
1428749_at	4.51805e-43	8.085	8.24328	-0.158274		1421521_at	7.72338e-26	2.46452	2.50184	-0.0373121		1444312_at	1.96986e-20	5.35008	6.63689	-1.28681
1424524_at	5.10938e-43	7.38338	7.05928	0.324098		1434836_at	8.76041e-26	6.01725	6.05974	-0.0424887		1420407_at	2.33495e-20	2.91182	2.78781	0.124004
1435627_x_at	9.59809e-43	4.79283	4.78091	0.0119211		1424781_at	1.12228e-25	7.04674	6.74166	0.305083		1460197_a_at	3.4881e-20	6.93956	7.05134	-0.111787
1438097_at	1.21588e-42	5.81392	5.93771	-0.123788		1417268_at	1.16263e-25	8.30177	7.66854	0.633232		1422041_at	4.48598e-20	6.49477	6.53448	-0.0397105
1425958_at	1.48849e-42	6.28413	6.21351	0.0706129		1422190_at	1.30519e-25	5.18099	5.0883	0.0926886		1449591_at	5.61466e-20	5.71391	5.55305	0.160855
1438855_x_at	2.46837e-42	4.34932	4.4695	-0.120173		1420886_a_at	1.40931e-25	7.05249	6.91018	0.142316		1428700_at	5.75474e-20	10.176	10.2285	-0.0524995
1451798_at	2.84758e-42	7.37887	7.4675	-0.0886239		1416019_at	2.34692e-25	8.896	8.72017	0.175834		1454713_s_at	7.46538e-20	8.32381	8.28447	0.0393399
1451858_at	3.37701e-42	4.73297	4.7169	0.0160718		1441850_x_at	2.51719e-25	3.24074	3.49771	-0.256966		1451316_a_at	7.71643e-20	5.3979	5.38825	0.0096526
1421366_at	3.44039e-42	8.23716	8.40027	-0.163112		1437467_at	2.54172e-25	4.37242	4.59067	-0.218254		1438653_x_at	8.18922e-20	5.16813	5.97185	-0.803721
1452519_a_at	3.45664e-42	6.28801	5.80964	0.47837		1424724_a_at	4.85556e-25	5.16419	5.25739	-0.0931984		1437463_x_at	1.12132e-19	12.3805	12.355	0.0254991
1416881_at	4.78448e-42	5.94649	5.68666	0.259834		1452794_x_at	4.93751e-25	4.82678	4.99267	-0.165885		1426808_at	1.29531e-19	9.33058	9.45741	-0.126831
1448213_at	8.64864e-42	4.44013	4.5226	-0.0824631		1418406_at	5.64479e-25	4.55705	4.24665	0.310398		1452487_x_at	1.55855e-19	3.88746	3.96162	-0.0741556
1449399_a_at	8.9977e-42	7.18791	7.41085	-0.222935		1437270_a_at	8.29716e-25	5.89395	5.72779	0.166155		1449188_at	1.58503e-19	8.52854	8.49827	0.0302783
1416442_at	1.22834e-41	10.2952	10.3837	-0.0884661		1438313_at	9.21132e-25	6.12916	6.15873	-0.0295745		1441887_x_at	1.81324e-19	6.79721	6.6898	0.107413
1449028_at	1.72186e-41	6.82784	7.01549	-0.187651		1417262_at	1.08369e-24	5.74435	5.81946	-0.0751046		1418847_at	1.82896e-19	5.94465	6.04109	-0.0964403
1419091_a_at	1.80742e-41	6.94783	7.17047	-0.222642		1437247_at	1.21298e-24	11.7609	12.0121	-0.251215		1450322_s_at	1.92955e-19	6.90002	6.87749	0.0225325
1456388_at	2.01413e-41	6.04831	5.25333	0.794977		1439920_at	1.43889e-24	2.80702	2.76075	0.0462681		1416119_at	1.93784e-19	13.516	13.5742	-0.0581398
1449322_at	2.32827e-41	4.37319	4.69847	-0.32528		1460458_at	1.5077e-24	12.7881	12.8594	-0.0712777		1419272_at	2.11835e-19	5.9743	6.176	-0.201698
1435415_x_at	2.98725e-41	4.77367	4.65455	0.119119		1425837_a_at	1.60951e-24	7.49135	7.45057	0.0407786		1437478_s_at	2.17138e-19	5.77766	5.75588	0.0217836
1451340_at	6.38769e-41	7.71407	7.92341	-0.209337		1420868_s_at	1.86965e-24	5.81813	5.91077	-0.092637		1438841_s_at	2.32455e-19	2.56424	2.58908	-0.0248442
1416273_at	7.6659e-41	8.4043	8.41442	-0.0101129		1437351_at	1.91922e-24	6.63197	5.81696	0.815011		1434418_at	2.50008e-19	6.43823	6.50389	-0.0656541
1440865_at	8.22133e-41	6.51211	6.40275	0.109361		1425895_a_at	1.92997e-24	6.75253	6.2462	0.50633		1425958_at	3.22024e-19	12.7578	12.7378	0.0200273
1420764_at	8.61663e-41	5.32429	5.54008	-0.215795		1449748_at	2.08862e-24	7.76905	7.78897	-0.0199239		1415971_at	3.47669e-19	9.83017	9.67087	0.159305
1427736_a_at	9.57398e-41	5.99446	6.05909	-0.064633		1449212_at	2.10204e-24	10.7253	10.8827	-0.157451		1448291_at	3.96816e-19	6.19198	6.20745	-0.0154758
1424880_at	1.32608e-40	5.97524	5.81468	0.160559		1422631_at	2.20636e-24	5.99456	5.90806	0.0864979		1435761_at	4.13435e-19	3.79025	3.78456	0.00568518
1456893_at	1.46295e-40	5.1985	5.26585	-0.0673539		1419647_a_at	2.31153e-24	4.89915	4.74892	0.15023		1427164_at	4.4419e-19	8.04214	8.06931	-0.0271702
1422190_at	1.51198e-40	8.37416	7.21805	1.15611		1426300_at	3.37953e-24	4.66696	4.68102	-0.0140622		1453196_a_at	4.52801e-19	6.84306	6.84562	-0.00256535
1448306_at	1.57016e-40	7.45785	7.68955	-0.231704		1446876_at	3.45106e-24	4.21786	4.18643	0.0314291		1437277_x_at	4.90414e-19	5.41499	4.96555	0.449443
1434848_at	1.59405e-40	3.16495	3.19567	-0.0307203		1425128_at	3.64008e-24	6.95862	7.01641	-0.0577958		1417290_at	5.42459e-19	8.42727	8.60075	-0.173479
1451316_a_at	1.78566e-40	10.0251	9.97833	0.0467447		1420819_at	3.80369e-24	9.08301	8.9298	0.153217		1416576_at	5.74562e-19	8.25405	8.39237	-0.138319
1454713_s_at	2.2264e-40	4.84263	4.84595	-0.00331388		1449554_at	4.03206e-24	6.41827	6.40709	0.011181		1438164_x_at	6.89806e-19	6.06987	6.18448	-0.114617
1418847_at	2.50358e-40	6.64037	6.63618	0.00419437		1449028_at	4.10315e-24	6.17018	6.05135	0.118829		1429947_a_at	8.555e-19	4.26635	4.23348	0.0328755
1438157_s_at	3.83347e-40	3.06473	3.23301	-0.168277		1457825_x_at	4.17957e-24	6.43411	6.54277	-0.108658		1419532_at	8.92162e-19	8.52452	8.60518	-0.0806647
1442339_at	4.04246e-40	6.79566	5.1901	1.60556		1422880_at	4.24797e-24	5.99392	6.05044	-0.0565195		1434484_at	9.53915e-19	8.06428	8.34092	-0.276639
1438657_x_at	4.37485e-40	6.2364	6.21423	0.0221673		1438657_x_at	4.33002e-24	5.17687	5.10566	0.0712151		1431339_a_at	1.59867e-18	4.62354	4.44741	0.17613
1418685_at	4.43607e-40	6.23699	6.05024	0.186744		1434758_at	4.94753e-24	5.30789	5.29225	0.0156396		1426276_at	1.68708e-18	6.71699	6.62569	0.0913009
1426978_at	4.86499e-40	10.9514	10.5025	0.448919		1452519_a_at	5.30551e-24	5.65709	4.73081	0.926281		1455660_at	1.81156e-18	6.16121	6.20207	-0.0408624
1441887_x_at	5.14102e-40	4.27677	4.33413	-0.0573576		1448309_at	5.81116e-24	4.45348	3.77533	0.678146		1443835_x_at	1.91687e-18	5.15824	5.55448	-0.396248
1417483_at	5.25026e-40	9.43227	8.05835	1.37392		1451387_s_at	6.20054e-24	3.90415	3.91868	-0.0145283		1456466_x_at	1.95831e-18	7.01311	7.23391	-0.220803
1420088_at	5.36146e-40	11.6409	11.3641	0.276728		1449962_at	6.60538e-24	4.62452	4.74114	-0.116623		1436416_x_at	2.02724e-18	3.62294	3.48804	0.134903
1416359_at	8.94813e-40	7.75617	7.68389	0.0722739		1459606_at	6.89536e-24	3.4107	3.68199	-0.271287		1454988_s_at	2.25998e-18	5.70404	5.65135	0.0526856
1416454_s_at	1.42279e-39	9.34418	9.65475	-0.310572		1418798_s_at	7.03726e-24	7.46457	7.40106	0.063512		1448123_s_at	3.68874e-18	5.57083	5.52623	0.0445928
1438767_at	1.67807e-39	6.05416	6.08716	-0.033002		1451208_at	7.63333e-24	6.10461	5.73114	0.37347		1455104_at	4.07235e-18	6.16354	6.59223	-0.428688
1451796_s_at	2.07245e-39	7.73611	6.84457	0.891544		1427227_at	1.09798e-23	7.67486	7.4946	0.180259		1426315_a_at	4.09453e-18	8.0037	7.56266	0.44104
1460271_at	2.36754e-39	3.33999	3.14049	0.199496		1457914_at	1.19505e-23	6.64119	6.39278	0.24841		1418340_at	5.1848e-18	3.12176	3.04272	0.0790383
1449731_s_at	2.42454e-39	2.5374	2.52746	0.00994089		1460408_at	1.36496e-23	5.63175	5.81024	-0.178497		1460351_at	5.89449e-18	8.62507	9.04319	-0.418121
1460351_at	2.52265e-39	5.83916	4.70136	1.1378		1420873_at	1.76509e-23	7.14105	7.02552	0.115522		1437380_x_at	6.32284e-18	5.97177	6.05239	-0.0806238
1453181_x_at	2.84945e-39	4.78686	5.18635	-0.399486		1452521_a_at	1.79059e-23	4.07615	3.98752	0.0886319		1417289_at	7.71335e-18	6.93565	7.05046	-0.114804
1427381_at	2.87707e-39	9.34162	10.084	-0.742377		1424880_at	1.81107e-23	10.1298	10.0277	0.102119		1419681_a_at	8.67046e-18	10.5185	9.20904	1.30942
1434830_at	3.24758e-39	4.32429	5.50337	-1.17908		1430533_a_at	1.86131e-23	10.8771	10.7375	0.139594		1457976_at	8.73503e-18	6.82484	6.70887	0.115963
1448830_at	3.42723e-39	5.41715	5.35715	0.0600048		1455002_at	1.92123e-23	6.43236	6.45412	-0.0217657		1424027_at	9.62641e-18	9.68563	9.64711	0.0385185
1450513_at	3.66769e-39	9.55372	8.77544	0.778284		1447460_at	1.94015e-23	5.89516	5.95868	-0.0635205		1450783_at	1.11356e-17	3.03157	2.95784	0.0737242
1417291_at	3.67957e-39	3.84534	3.97503	-0.129682		1448204_at	2.10735e-23	6.29409	5.69846	0.595635		1453015_at	1.11983e-17	3.04196	3.01577	0.0261994
1434015_at	4.83753e-39	6.19733	6.28523	-0.0879019		1459999_at	2.25533e-23	3.68909	3.27759	0.411504		1428562_at	1.24504e-17	4.00951	4.29407	-0.284563
1455019_x_at	6.69155e-39	10.8391	11.2237	-0.38461		1454080_at	2.38786e-23	6.38064	6.97657	-0.595923		1422259_a_at	1.30222e-17	9.33045	9.5064	-0.175954
1417074_at	8.28595e-39	7.78543	7.75904	0.0263936		1450297_at	2.95251e-23	7.58844	7.49031	0.0981312		1435010_at	1.39857e-17	7.93776	7.45201	0.485749
1424638_at	8.97041e-39	3.90665	3.99277	-0.0861274		1438237_at	3.03003e-23	3.57972	3.3819	0.197821		1425215_at	1.5117e-17	6.08503	6.13367	-0.0486378
1429527_a_at	1.97071e-38	7.00703	6.54207	0.464951		1416576_at	3.08203e-23	9.37364	8.98107	0.392571		1451118_a_at	1.52367e-17	10.3217	10.3611	-0.0393699
1417460_at	1.98031e-38	8.17565	8.04734	0.128315		1428645_at	4.01468e-23	5.34984	4.90123	0.448605		1420273_x_at	1.79381e-17	7.23519	7.5523	-0.317109
1427994_at	2.07143e-38	8.03481	7.89227	0.142541		1422921_at	4.21184e-23	9.88978	9.80094	0.0888388		1422704_at	1.91184e-17	7.28362	7.55758	-0.273967
1435761_at	2.8396e-38	3.71733	3.72291	-0.00558096		1430057_s_at	4.71792e-23	5.134	5.2887	-0.154695		1426316_at	1.91369e-17	3.97286	4.05668	-0.0838175
1420089_at	6.12028e-38	8.10148	8.06814	0.0333445		1446122_at	4.90124e-23	6.35805	6.2059	0.152151		1435906_x_at	1.92964e-17	4.24007	4.34101	-0.10094
1418939_at	6.67634e-38	4.74995	4.81051	-0.0605589		1453985_at	5.66347e-23	6.38791	6.29925	0.0886566		1448213_at	2.52183e-17	6.54069	6.6034	-0.0627135
1434350_at	1.00375e-37	4.06528	3.97353	0.0917528		1427314_at	5.75794e-23	5.87535	5.67284	0.202509		1438627_x_at	2.53208e-17	11.8547	12.1289	-0.274194
1439349_at	1.30311e-37	5.33517	5.56514	-0.229971		1457108_at	5.83451e-23	7.60297	7.46475	0.138227		1416253_at	2.59454e-17	7.62459	7.67211	-0.0475172
1433441_at	1.55029e-37	3.56098	3.5219	0.0390834		1423612_at	6.00298e-23	5.63391	5.56974	0.0641662		1452732_at	2.6913e-17	5.65564	5.79501	-0.139371
1444090_at	1.77983e-37	2.5944	2.58202	0.0123857		1458858_at	7.55356e-23	6.11924	6.45395	-0.334705		1434075_at	2.88093e-17	7.11409	7.41548	-0.301396
1426754_x_at	2.43777e-37	6.18959	6.20621	-0.0166234		1431010_a_at	8.13071e-23	6.28491	6.36259	-0.0776754		1433428_x_at	3.35695e-17	6.09856	6.18806	-0.0894955
1420804_s_at	2.84529e-37	4.66537	5.09949	-0.434122		1445767_at	9.32455e-23	4.68831	4.58154	0.106762		1451416_a_at	3.71111e-17	6.83213	6.67928	0.152844
1428517_at	2.92501e-37	6.73461	7.6028	-0.868196		1440101_at	1.20675e-22	5.13944	5.27286	-0.133418		1438855_x_at	3.8684e-17	9.23354	9.52313	-0.289587
1416125_at	3.26795e-37	9.2113	9.32011	-0.108808		1416496_at	1.24212e-22	11.7057	11.7625	-0.0568155		1448110_at	3.92559e-17	6.1343	6.26376	-0.129466
1438841_s_at	4.03397e-37	4.22071	4.25087	-0.0301534		1418622_at	1.30426e-22	6.31929	5.85914	0.460152		1453239_a_at	4.24685e-17	8.43637	8.36109	0.0752829
1428572_at	4.17049e-37	8.31515	8.37931	-0.0641548		1423353_at	1.4306e-22	8.07088	7.80185	0.269023		1435872_at	4.25971e-17	6.58892	6.87026	-0.281341
1452732_at	5.29044e-37	8.40179	8.16326	0.238534		1420083_at	1.5678e-22	9.50828	9.15826	0.350022		1417903_at	4.29696e-17	3.81285	3.70022	0.112632
1448291_at	6.5164e-37	8.74822	9.00757	-0.259352		1434283_at	1.56911e-22	6.77852	6.28644	0.492078		1433441_at	4.48572e-17	10.3183	10.0193	0.299008
1417262_at	7.67407e-37	5.46086	5.52247	-0.0616029		1456610_at	1.57239e-22	5.228	5.14699	0.0810069		1436771_x_at	5.77249e-17	5.87362	5.8725	0.00111521
1460329_at	1.07182e-36	6.79339	6.93025	-0.136856		1451494_at	1.71936e-22	6.4891	6.79121	-0.302112		1427041_at	6.84215e-17	7.69973	7.15008	0.549649
1448573_a_at	1.14975e-36	6.86727	6.97472	-0.107447		1435231_at	1.86562e-22	6.75107	6.56363	0.187446		1448887_x_at	6.84913e-17	8.02434	7.8367	0.187648
1451021_a_at	1.22415e-36	7.53304	7.02105	0.511996		1459319_at	1.91603e-22	9.25252	8.68172	0.570796		1456700_x_at	7.01416e-17	7.75815	7.97414	-0.215989
1424256_at	1.42158e-36	4.37023	4.36405	0.00618272		1454041_at	1.92819e-22	7.58743	7.8013	-0.213864		1454064_a_at	7.33428e-17	10.3517	9.45204	0.89962
1420886_a_at	1.79324e-36	8.57205	8.11944	0.452607		1451469_at	2.11821e-22	5.60225	5.21083	0.391422		1415871_at	8.17372e-17	3.37792	3.41977	-0.0418441
1435458_at	1.81993e-36	6.83463	7.24844	-0.413802		1418971_x_at	2.15749e-22	4.19904	3.9129	0.286144		1422506_a_at	8.90481e-17	9.33075	9.55009	-0.219342
1448871_at	2.12054e-36	5.47773	5.77512	-0.297382		1442483_at	2.43649e-22	5.47411	5.50769	-0.0335756		1425065_at	1.00873e-16	7.20157	7.15164	0.0499276
1424831_at	2.23723e-36	9.65953	10.0855	-0.425961		1447969_at	2.48317e-22	5.02318	5.0056	0.0175794		1449455_at	1.05591e-16	5.87254	5.93656	-0.0640268
1431010_a_at	2.24669e-36	8.83408	8.39412	0.439957		1426754_x_at	2.53438e-22	10.7401	10.7287	0.0113871		1449366_at	1.21071e-16	11.2547	11.2121	0.0425962
1458351_s_at	2.74773e-36	3.50406	3.49796	0.00610516		1416440_at	2.53843e-22	8.30011	8.06715	0.232958		1420330_at	1.39018e-16	10.0312	10.2718	-0.240571
1434025_at	2.85294e-36	6.94827	6.95985	-0.0115818		1446642_at	2.58673e-22	4.12635	4.09148	0.0348674		1440346_at	1.39717e-16	7.35495	7.54983	-0.194879
1420197_at	3.32151e-36	6.21976	6.04814	0.171623		1457756_at	2.69159e-22	4.82092	4.76478	0.0561394		1419647_a_at	1.4141e-16	7.67431	7.71805	-0.0437398
1448503_at	4.84052e-36	6.1347	6.08885	0.0458477		1460335_at	2.75029e-22	9.06971	9.07971	-0.00999729		1436576_at	1.49797e-16	7.10806	7.26477	-0.156711
1460282_at	6.54714e-36	6.54416	7.05418	-0.510014		1426708_at	2.79689e-22	8.19734	8.23139	-0.0340532		1421304_at	1.56419e-16	9.33958	9.26188	0.077703
1426680_at	1.21329e-35	6.00266	5.33377	0.668886		1428288_at	2.87008e-22	9.10777	8.30458	0.803189		1438633_x_at	1.58015e-16	8.71696	8.71297	0.00398629
1423017_a_at	1.60567e-35	9.32435	9.95057	-0.626223		1426587_a_at	2.92954e-22	5.38443	5.33245	0.0519876		1420887_a_at	1.6107e-16	3.27552	3.3774	-0.101881
1415971_at	1.86684e-35	13.5516	13.3381	0.213485		1416454_s_at	3.44907e-22	8.67706	8.31231	0.364752		1455019_x_at	1.76202e-16	4.71862	4.04315	0.675475
1453851_a_at	1.94321e-35	3.11031	3.25239	-0.142082		1458128_at	3.60493e-22	4.80462	4.87535	-0.0707305		1437025_at	1.86042e-16	8.52375	8.92705	-0.403294
1419721_at	2.82216e-35	5.37323	5.3078	0.0654321		1445956_at	4.06508e-22	6.79126	6.52078	0.270482		1436333_a_at	2.05461e-16	5.91058	5.9904	-0.079819
1448881_at	4.30454e-35	7.36656	6.38859	0.97797		1442042_at	4.11713e-22	6.15378	5.80949	0.344287		1419526_at	2.15938e-16	5.79771	5.83212	-0.0344094
1419709_at	8.05607e-35	9.9831	10.0411	-0.0580279		1431760_a_at	4.4302e-22	6.96346	6.94941	0.0140518		1427256_at	2.17409e-16	8.38	8.32262	0.0573793
1448620_at	8.5167e-35	4.29727	4.3508	-0.0535301		1420369_a_at	4.4513e-22	7.48495	7.51152	-0.0265717		1435627_x_at	2.1822e-16	7.74127	8.24203	-0.500759
1460694_s_at	9.35404e-35	6.10461	6.01369	0.0909242		1447448_s_at	4.55678e-22	4.17276	4.1129	0.0598562		1422507_at	2.76065e-16	3.33592	3.63881	-0.302893
1417065_at	9.58156e-35	6.82212	6.85214	-0.0300181		1419609_at	4.59623e-22	11.0648	10.7295	0.335275		1419604_at	2.88188e-16	8.84146	8.96316	-0.121697
1417741_at	9.96727e-35	5.22543	5.22658	-0.00114842		1426112_a_at	4.63356e-22	5.99868	5.91058	0.088098		1417500_a_at	3.00534e-16	8.70992	8.92542	-0.215504
1420464_s_at	1.19616e-34	9.52511	8.11342	1.4117		1427992_a_at	4.87563e-22	7.03029	7.79906	-0.768775		1418890_a_at	3.0167e-16	3.77612	3.64611	0.130019
1423520_at	1.31279e-34	11.1713	10.6377	0.53359		1420649_at	5.22511e-22	6.24016	6.35342	-0.11326		1428357_at	3.04554e-16	8.29544	8.31625	-0.0208038
1450971_at	1.56824e-34	3.70094	3.7398	-0.038855		1417905_at	5.36894e-22	12.5014	12.6912	-0.189734		1450234_at	3.06958e-16	4.45224	4.0728	0.379434
1421679_a_at	1.69832e-34	7.14105	7.01511	0.125938		1435145_at	5.44076e-22	6.60355	6.40104	0.202511		1455900_x_at	3.15e-16	3.20405	3.21561	-0.0115619
1416119_at	2.01641e-34	8.1647	8.15303	0.0116696		1453897_at	6.14893e-22	5.21301	5.00509	0.207921		1448467_a_at	3.24679e-16	7.20287	7.40086	-0.19799
1449005_at	2.86738e-34	5.11072	5.394	-0.283276		1440162_x_at	6.62095e-22	5.02465	5.04552	-0.0208672		1419493_a_at	3.59531e-16	12.4697	12.6305	-0.16084
1452181_at	3.33105e-34	6.70908	6.93067	-0.221596		1456875_at	7.41472e-22	7.29035	6.95291	0.337445		1425407_s_at	3.72053e-16	7.81792	7.31109	0.506833
1437223_s_at	4.63079e-34	3.53949	3.76777	-0.228283		1424441_at	7.89824e-22	9.07867	8.75966	0.319009		1417160_s_at	3.8122e-16	8.21603	8.46904	-0.253011
1420011_s_at	5.17218e-34	7.95674	8.1963	-0.239553		1420011_s_at	8.12873e-22	7.77773	7.25529	0.522438		1430612_at	3.87669e-16	5.59991	6.07938	-0.479476
1422013_at	7.16488e-34	7.16399	7.06764	0.0963513		1444736_at	8.18033e-22	10.427	10.3353	0.0917357		1449399_a_at	4.02418e-16	9.28463	9.14614	0.138499
1455009_at	8.01447e-34	5.08215	5.02648	0.0556719		1458089_at	8.62038e-22	8.52872	8.07611	0.452611		1449184_at	4.31785e-16	6.15359	6.39388	-0.240289
1417542_at	8.05601e-34	10.5621	10.1287	0.433473		1440815_x_at	8.80788e-22	2.58917	2.51647	0.0726992		1451796_s_at	4.38734e-16	5.29345	5.35434	-0.0608946
1421457_a_at	1.04792e-33	5.88414	5.91085	-0.026702		1421736_at	9.15139e-22	5.83677	5.57941	0.257357		1450792_at	4.56911e-16	7.57709	7.54365	0.0334404
1424441_at	1.23058e-33	7.28918	7.53494	-0.24576		1443058_at	9.26843e-22	6.16179	5.67902	0.482774		1426373_at	4.57787e-16	9.51395	9.82731	-0.313364
1434484_at	1.39436e-33	9.40531	8.83652	0.568787		1438097_at	9.44677e-22	5.4338	5.18971	0.244096		1451335_at	4.61022e-16	6.70682	6.81009	-0.103268
1428562_at	1.48159e-33	5.72618	5.76579	-0.0396099		1416566_at	9.53548e-22	5.58769	5.89408	-0.306394		1435458_at	4.85384e-16	6.72518	6.66405	0.0611346
1422568_at	1.86944e-33	6.43502	6.07341	0.36161		1455766_at	1.00632e-21	6.87628	6.20547	0.670818		1434773_a_at	4.99662e-16	4.47835	4.40931	0.0690361
1417068_a_at	1.88419e-33	4.18504	4.22617	-0.0411293		1424343_a_at	1.10758e-21	5.23133	5.07927	0.152063		1417916_a_at	5.00013e-16	5.82551	5.80168	0.0238214
1455104_at	1.98998e-33	3.84042	3.8961	-0.0556792		1452181_at	1.3227e-21	3.47485	3.33614	0.138709		1419274_at	5.21317e-16	3.53435	3.47953	0.0548207
1417392_a_at	2.01224e-33	5.79878	5.83212	-0.0333475		1448159_at	1.33627e-21	7.84656	7.77707	0.0694855		1437226_x_at	5.45685e-16	6.58759	6.90103	-0.313442
1435758_at	2.44411e-33	7.64374	7.14034	0.503409		1454654_at	1.33732e-21	3.18062	3.2923	-0.111673		1445687_at	6.20582e-16	6.09739	6.13287	-0.035483
1452922_at	2.97121e-33	4.68664	4.63562	0.0510122		1421457_a_at	1.49138e-21	8.84372	8.98357	-0.139859		1449134_s_at	6.6351e-16	8.91246	8.77493	0.137535
1447685_x_at	3.43645e-33	5.19788	5.19513	0.00275341		1417566_at	1.50775e-21	6.77471	5.71899	1.05572		1425380_at	6.95896e-16	5.88359	5.99172	-0.10813
1418162_at	3.59464e-33	8.98167	8.61209	0.369579		1452160_at	1.58117e-21	4.40408	4.36417	0.0399115		1420272_at	7.01564e-16	7.25761	8.60042	-1.3428
1448728_a_at	4.59364e-33	7.11842	6.94413	0.174293		1425609_at	1.7385e-21	5.91341	5.66947	0.243939		1417696_at	7.03315e-16	7.72888	8.03101	-0.302134
1424067_at	5.24659e-33	6.40996	6.22147	0.188492		1425587_a_at	1.83885e-21	8.96526	8.07431	0.890951		1418240_at	7.06114e-16	6.60069	6.63268	-0.0319907
1452521_a_at	5.39126e-33	6.41827	6.4425	-0.0242336		1423345_at	2.01976e-21	2.88532	2.75215	0.133176		1419599_s_at	7.23324e-16	5.81946	5.78185	0.0376008
1449360_at	5.58392e-33	7.70791	7.30602	0.401887		1448511_at	2.09373e-21	3.19359	3.23869	-0.0451013		1422013_at	7.54419e-16	5.02275	5.68825	-0.665499
1416298_at	5.63728e-33	10.3071	9.53539	0.771761		1447685_x_at	2.16099e-21	7.52813	7.11045	0.417683		1456388_at	7.84973e-16	9.52099	8.99243	0.52856
1422852_at	6.98605e-33	4.78462	4.82844	-0.0438212		1456319_at	2.18731e-21	7.49074	7.38417	0.106568		1418575_at	8.31416e-16	6.2852	6.43292	-0.147721
1419208_at	7.79042e-33	8.13145	7.71866	0.412785		1450039_at	2.25119e-21	6.27267	6.24492	0.0277498		1424831_at	8.92587e-16	9.16098	9.30384	-0.142859
1426708_at	8.54516e-33	6.41501	6.3997	0.0153124		1437056_x_at	2.29709e-21	7.23882	7.09366	0.145158		1456893_at	9.50587e-16	6.28717	6.35102	-0.0638555
1460700_at	8.79113e-33	7.68538	7.51921	0.166171		1421102_a_at	2.31741e-21	10.3467	10.205	0.141736		1419598_at	1.06122e-15	6.85237	6.93255	-0.0801837
1418163_at	9.32991e-33	7.5036	7.32011	0.183488		1459008_at	2.4188e-21	2.35773	2.45651	-0.0987728		1417933_at	1.16622e-15	10.1538	10.5452	-0.391415
1423241_a_at	9.5402e-33	8.74261	8.71297	0.0296324		1418054_at	2.51272e-21	4.97363	4.41334	0.560288		1439814_at	1.31128e-15	6.45545	6.64397	-0.188521
1428508_at	1.0221e-32	8.84984	9.05674	-0.206898		1420608_at	2.66229e-21	8.30205	8.26941	0.0326387		1434049_at	1.33621e-15	6.80752	6.47428	0.333241
1436590_at	1.3228e-32	6.46297	6.31218	0.150793		1436585_at	2.68183e-21	8.71761	8.38783	0.329771		1417876_at	1.33967e-15	4.89821	4.93131	-0.0330962
1426587_a_at	1.50293e-32	5.38277	5.58015	-0.19739		1421639_at	2.78995e-21	4.18283	4.24844	-0.0656123		1429527_a_at	1.38188e-15	8.54481	8.27635	0.268461
1422576_at	1.62196e-32	2.46452	2.49001	-0.0254864		1459574_at	2.95962e-21	6.08026	5.32998	0.750285		1444056_at	1.42232e-15	7.04869	6.95985	0.0888372
1456610_at	1.72207e-32	5.58999	5.71279	-0.1228		1417730_at	3.48883e-21	2.54737	2.63878	-0.0914039		1449976_a_at	1.43972e-15	6.52346	6.43885	0.084613
1419004_s_at	1.95214e-32	6.94028	7.04398	-0.103698		1448914_a_at	3.54946e-21	6.03767	5.7433	0.294368		1453839_a_at	1.47872e-15	7.88399	7.89464	-0.0106548
1419599_s_at	2.0158e-32	9.13638	9.30384	-0.167459		1418322_at	3.59884e-21	6.66986	6.1396	0.530266		1457438_at	1.49777e-15	5.69905	5.70717	-0.00811428
1419598_at	2.03676e-32	10.9086	10.8648	0.0437784		1419209_at	3.72531e-21	5.57851	5.5043	0.0742061		1454783_at	1.54947e-15	8.38788	8.25762	0.13026
1456223_at	2.47226e-32	5.87952	5.57673	0.302795		1416700_at	3.94891e-21	13.8491	13.9985	-0.149484		1424524_at	1.76758e-15	4.73426	4.91563	-0.181373
1453782_at	3.51915e-32	6.49663	6.75595	-0.259313		1418901_at	4.08972e-21	8.65057	8.49971	0.150859		1418825_at	1.81239e-15	7.47014	7.65209	-0.181952
1425407_s_at	4.53107e-32	7.26403	7.01855	0.245473		1422568_at	4.20886e-21	10.3284	10.393	-0.0646288		1437752_at	1.81609e-15	6.57156	6.91346	-0.341908
1425663_at	4.68226e-32	9.34944	9.13193	0.217508		1460149_at	4.41008e-21	3.24651	3.31489	-0.0683717		1423583_at	1.8481e-15	7.86713	8.45935	-0.592225
1419410_at	4.8088e-32	7.02872	7.82518	-0.796463		1428214_at	4.52601e-21	5.80759	5.85675	-0.0491563		1459522_s_at	1.89562e-15	6.36259	6.58159	-0.219006
1456028_x_at	5.83929e-32	7.40265	6.42313	0.979514		1423112_at	4.53568e-21	4.59804	4.67442	-0.0763776		1425037_at	1.92343e-15	9.0615	9.1844	-0.122894
1438164_x_at	8.78602e-32	5.72561	5.81819	-0.0925887		1458772_at	4.61787e-21	9.12617	8.7216	0.40457		1420464_s_at	1.98978e-15	9.05373	9.67196	-0.618227
1434418_at	1.10563e-31	5.03168	5.03839	-0.00671366		1433508_at	5.34437e-21	5.00856	4.80183	0.20673		1450826_a_at	2.04199e-15	9.60968	9.44371	0.165966
1422508_at	1.21979e-31	3.26043	3.37204	-0.111605		1428594_at	5.43215e-21	6.48404	6.45445	0.0295923		1437247_at	2.2246e-15	8.1079	8.02263	0.0852671
1436921_at	1.37386e-31	7.23679	7.15154	0.0852438		1419132_at	5.58714e-21	6.09314	5.6968	0.396341		1424655_at	2.2307e-15	10.7131	11.1885	-0.475388
1428750_at	1.3759e-31	8.83034	9.06963	-0.239287		1460006_at	5.71394e-21	9.84247	10.1739	-0.331414		1455606_at	2.38944e-15	4.44507	4.45232	-0.00724507
1416543_at	1.41574e-31	6.83163	6.73762	0.0940038		1430443_at	6.50192e-21	8.37599	8.27626	0.099737		1417111_at	2.95876e-15	11.1703	11.1746	-0.00424492
1426808_at	1.50993e-31	5.33596	5.36349	-0.0275233		1460119_at	7.04692e-21	10.7601	10.6142	0.145885		1416381_a_at	3.46996e-15	8.94733	8.84469	0.102637
1440831_at	2.0337e-31	6.90015	7.05289	-0.152747		1419945_s_at	7.37161e-21	3.89018	3.95163	-0.0614554		1440299_at	3.88739e-15	7.72316	7.86995	-0.146793
1417544_a_at	2.3519e-31	6.92873	7.07364	-0.144916		1455087_at	7.57736e-21	7.11574	7.09415	0.0215907		1423298_at	3.93616e-15	4.0062	4.07848	-0.0722788
1448231_at	2.58174e-31	5.66868	5.69149	-0.022805		1459378_at	7.92841e-21	6.24329	5.86503	0.378255		1419610_at	4.22578e-15	7.66854	7.44621	0.222334
1415972_at	4.08428e-31	7.56945	7.24155	0.327892		1434772_at	7.99487e-21	4.29727	4.21899	0.0782872		1419909_at	4.77379e-15	7.52537	7.70912	-0.183759
1425412_at	4.09999e-31	7.48214	7.20602	0.276121		1448795_a_at	8.16349e-21	2.57251	2.631	-0.0584882		1416132_at	4.81189e-15	13.6215	13.686	-0.0645425
1419537_at	4.11223e-31	7.62149	7.07375	0.547744		1442180_at	8.41653e-21	3.42072	3.41241	0.00830405		1418191_at	5.18038e-15	8.96254	9.06254	-0.100003
1419526_at	4.17653e-31	7.39038	7.12787	0.262511		1431642_at	8.43686e-21	3.36317	3.45386	-0.0906899		1424302_at	5.46198e-15	10.2702	10.2343	0.0358603
1420703_at	4.266e-31	5.05601	5.12771	-0.0716967		1419432_at	8.73989e-21	9.27735	9.0615	0.215849		1450672_a_at	5.48312e-15	6.72418	6.76445	-0.0402648
1456544_at	5.74001e-31	4.16757	4.24644	-0.0788644		1431449_at	8.84991e-21	3.23341	3.24557	-0.0121621		1425225_at	5.75554e-15	10.3536	10.6014	-0.247786
1434881_s_at	8.69781e-31	3.02001	3.2265	-0.206486		1448171_at	9.29772e-21	9.05686	8.4214	0.635459		1422027_a_at	5.88742e-15	7.23809	7.19429	0.0438062
1449773_s_at	8.81107e-31	3.9976	3.90236	0.0952392		1439322_at	9.58786e-21	2.60574	2.76615	-0.160406		1457676_at	5.97597e-15	4.12701	4.1307	-0.00369316
1450214_at	9.55841e-31	8.80827	8.17185	0.636417		1452161_at	9.69037e-21	5.48977	5.56515	-0.0753826		1416871_at	6.48113e-15	12.823	12.8102	0.0127669
1437514_at	1.0859e-30	6.65434	6.74009	-0.0857421		1457507_at	9.8382e-21	6.64021	6.34697	0.293236		1421463_at	6.55586e-15	7.09567	7.04664	0.0490246
1421408_at	1.08976e-30	5.15818	4.58118	0.577002		1450595_at	9.97499e-21	4.82982	4.80622	0.0236039		1426978_at	6.84412e-15	11.6795	11.6609	0.0185822
1457108_at	1.23422e-30	4.28154	4.2899	-0.0083681		1427718_a_at	1.04706e-20	9.31546	9.51527	-0.199806		1424727_at	6.98597e-15	8.55064	8.4253	0.125347
1436594_at	1.30574e-30	7.35738	7.33925	0.0181356		1416067_at	1.09604e-20	8.63846	8.53071	0.107751		1422567_at	7.21985e-15	7.08921	7.31129	-0.222086
1417290_at	1.45801e-30	13.4484	13.6275	-0.179074		1447425_at	1.14173e-20	4.52497	4.61772	-0.0927501		1420342_at	7.38248e-15	6.0681	5.88155	0.186549
1438148_at	1.72933e-30	6.72332	6.78894	-0.0656129		1427682_a_at	1.28731e-20	8.24972	7.95698	0.292747		1451860_a_at	7.80854e-15	5.03794	5.01853	0.0194078
1415973_at	1.76133e-30	10.3038	10.1983	0.105513		1448936_at	1.35687e-20	6.46253	6.35897	0.103554		1423520_at	7.83382e-15	6.21208	6.11139	0.100687
1429321_at	1.85189e-30	6.90644	6.76627	0.140173		1426899_at	1.52215e-20	4.96599	4.82348	0.142505		1434848_at	7.88854e-15	6.28259	6.70892	-0.426327
1417406_at	1.93814e-30	6.96913	7.06129	-0.0921558		1422626_at	1.55694e-20	8.14807	8.25839	-0.110328		1421326_at	8.0302e-15	7.91836	7.88357	0.0347925
1434547_at	2.01565e-30	6.42929	6.44853	-0.0192414		1420495_a_at	1.59176e-20	6.19738	4.97659	1.22079		AFFX-ThrX-5_at	8.37725e-15	9.29944	9.15952	0.139911
1438653_x_at	2.02827e-30	6.64514	7.15833	-0.513197		1440674_at	1.60917e-20	3.32795	3.2575	0.070447		1423706_a_at	8.92272e-15	7.68622	7.6186	0.0676159
1448700_at	2.71237e-30	7.00428	5.66916	1.33513		1426570_a_at	1.67276e-20	3.58761	3.4807	0.106901		1457753_at	8.94885e-15	6.34192	6.21442	0.127497
1434945_at	3.40977e-30	4.99228	4.93377	0.0585094		1444985_at	1.67989e-20	9.29539	8.76307	0.532323		1434017_at	8.96304e-15	5.89201	6.26655	-0.374538
1417744_a_at	3.96205e-30	13.6352	13.7484	-0.113216		1419024_at	1.88684e-20	10.7628	10.8262	-0.0633505		1435208_at	9.75455e-15	5.37229	5.34069	0.0315914
1433833_at	4.30241e-30	5.15613	5.21261	-0.0564835		1444333_at	1.96e-20	4.18005	4.07034	0.109704		1418204_s_at	9.9221e-15	8.98107	9.56141	-0.580349
1424302_at	4.59719e-30	4.03531	3.95124	0.084075		1448443_at	2.00446e-20	9.50819	9.30791	0.200282		1437060_at	9.97187e-15	3.69216	3.75621	-0.0640469
1455405_at	4.94754e-30	5.04005	5.10744	-0.067387		1449037_at	2.04968e-20	4.22986	3.95529	0.274575		1456407_a_at	1.11076e-14	4.1345	4.18693	-0.0524308
1428663_at	5.0323e-30	4.30816	4.2178	0.0903641		1455166_at	2.16864e-20	5.17573	5.197	-0.0212702		1421818_at	1.12431e-14	7.72007	8.27487	-0.554793
1428700_at	5.16542e-30	5.28837	4.94692	0.341443		1428837_at	2.19678e-20	4.8678	4.68779	0.180008		1453181_x_at	1.14121e-14	7.98687	8.0986	-0.111722
1435432_at	5.64021e-30	6.11345	6.07199	0.0414648		1452037_at	2.20835e-20	6.87427	7.65524	-0.78097		1452249_at	1.18823e-14	7.42436	7.21438	0.209982
1456500_at	5.77391e-30	5.12619	5.22383	-0.0976334		1459945_at	2.29846e-20	6.39736	6.4303	-0.0329361		1449078_at	1.22012e-14	8.69804	8.78139	-0.0833532
1447612_x_at	6.9883e-30	6.92075	7.54418	-0.623436		1457708_at	2.30178e-20	10.4548	10.8151	-0.360315		1443721_x_at	1.29738e-14	7.49394	7.28041	0.213528
1453572_a_at	7.28424e-30	8.22432	8.37216	-0.14784		1433833_at	2.317e-20	4.84077	4.90212	-0.0613412		1430769_s_at	1.32205e-14	3.4175	3.42095	-0.00345062
1438670_at	8.76052e-30	6.02613	6.07801	-0.0518775		1450937_at	2.34541e-20	6.55265	6.1403	0.412355		1418888_a_at	1.36959e-14	10.587	10.2996	0.287381
1421463_at	8.85431e-30	5.36477	4.98528	0.379495		1444668_at	2.57928e-20	2.71299	3.07663	-0.363644		1458933_at	1.42202e-14	9.06922	9.07842	-0.00920878
1419209_at	9.25291e-30	8.15434	7.84899	0.30535		1422978_at	2.73684e-20	8.25441	8.25508	-0.000665893		1423233_at	1.46333e-14	8.63349	8.69636	-0.0628656
1439623_at	1.3003e-29	13.0314	11.5018	1.52961		1457190_at	2.75684e-20	5.91636	5.98892	-0.0725632		1424976_at	1.47569e-14	5.60878	5.80778	-0.199007
1424727_at	1.33962e-29	8.07088	8.08325	-0.0123766		1445420_at	2.95997e-20	4.36525	4.19579	0.16946		1427368_x_at	1.49384e-14	8.29312	8.32632	-0.0331968
1434062_at	1.4405e-29	5.05626	5.00503	0.0512298		1417483_at	2.99376e-20	7.7544	7.15576	0.598634		1436923_at	1.56417e-14	8.44612	8.48927	-0.0431546
1448159_at	1.44952e-29	4.37453	4.52443	-0.149903		1437882_s_at	3.13143e-20	6.62732	6.76847	-0.141144		1451006_at	1.67886e-14	7.00961	7.41731	-0.4077
1416369_at	1.51863e-29	13.2953	13.4201	-0.124838		1433980_at	3.15143e-20	5.48506	5.29067	0.194388		1429509_at	1.70651e-14	7.37878	7.71679	-0.338004
1443721_x_at	1.80787e-29	5.00577	5.30371	-0.297937		1426685_a_at	3.32537e-20	6.82776	6.62599	0.201769		1417695_a_at	1.74135e-14	10.1176	10.3304	-0.212793
1449591_at	1.83385e-29	2.98649	3.01003	-0.0235381		1427899_at	3.36314e-20	4.23303	4.27327	-0.0402467		1448790_at	1.7479e-14	6.49744	6.53326	-0.0358186
1419691_at	1.84403e-29	5.75083	5.26742	0.483404		1416654_at	3.53259e-20	11.1604	10.5085	0.651905		1439264_x_at	1.96336e-14	5.75365	5.80328	-0.0496306
1427041_at	2.2697e-29	4.11865	4.39966	-0.281007		1438295_at	3.53893e-20	7.1827	7.00605	0.176649		1441726_at	2.1666e-14	6.73719	7.02817	-0.29098
1437870_at	2.60305e-29	5.96034	5.79916	0.161173		1445217_at	3.59039e-20	7.2762	6.76822	0.507979		1419971_s_at	2.18052e-14	8.42282	8.44738	-0.024555
1454762_at	2.78871e-29	6.59307	6.53961	0.0534584		1446587_at	3.6377e-20	5.66964	5.80077	-0.131126		1460067_at	2.29911e-14	7.2382	7.15833	0.0798633
1449222_at	2.98822e-29	3.47246	2.69119	0.781275		1454963_at	3.64403e-20	6.16695	6.16693	1.99034e-05		1452443_s_at	2.60381e-14	6.00926	6.10461	-0.0953575
1417564_at	4.21056e-29	7.70665	7.5523	0.154354		1449366_at	3.6564e-20	2.66858	2.73803	-0.0694567		1416483_at	2.61469e-14	8.32364	8.67745	-0.353819
1456700_x_at	4.78203e-29	4.74974	4.78192	-0.0321804		1442408_at	3.82637e-20	3.74716	3.64423	0.102926		1421366_at	2.64805e-14	8.43355	8.63372	-0.200162
1437939_s_at	5.96433e-29	4.36129	4.38367	-0.0223795		1456122_at	4.04773e-20	8.89531	8.63614	0.259167		1439443_x_at	2.73841e-14	8.38415	8.53	-0.145851
1458308_at	7.15721e-29	10.1122	10.6843	-0.572013		1441317_x_at	4.10239e-20	2.66997	2.7311	-0.0611376		1439349_at	2.74602e-14	4.02674	4.09406	-0.0673119
1424027_at	7.26334e-29	5.45365	6.21672	-0.763077		1454635_at	4.206e-20	6.99458	6.77325	0.221329		1422445_at	2.80454e-14	6.11326	6.21488	-0.101617
1423632_at	8.61469e-29	9.36644	9.39669	-0.0302531		1434126_at	4.36417e-20	6.32564	6.29936	0.0262796		1418162_at	2.8183e-14	8.70765	8.71829	-0.0106447
1437271_at	9.11126e-29	6.97009	6.53686	0.433232		1416881_at	4.48977e-20	9.07611	8.60879	0.467316		1415751_at	2.82923e-14	8.43586	8.5579	-0.122042
1416360_at	9.54574e-29	8.27576	8.28183	-0.00606907		1453679_at	4.50209e-20	10.2781	10.2725	0.00559364		1448190_at	2.93312e-14	7.56734	7.58713	-0.0197984
1450718_at	1.00454e-28	7.65822	7.84157	-0.183355		1435147_x_at	4.52576e-20	5.19788	5.16705	0.0308324		1417457_at	2.99745e-14	12.9416	12.9819	-0.0402489
1460283_at	1.06231e-28	7.70364	7.463	0.240635		1434496_at	4.63907e-20	6.66515	6.61348	0.0516698		1449360_at	3.06363e-14	12.1663	12.1187	0.0475887
1416654_at	1.10109e-28	8.9407	8.99154	-0.0508378		1440487_at	4.70457e-20	5.78433	6.07166	-0.287339		1423441_at	3.07022e-14	6.63284	6.615	0.0178387
1449435_at	1.13112e-28	4.12535	3.72072	0.404632		1455893_at	4.71245e-20	5.57677	5.54344	0.0333308		1426599_a_at	3.33382e-14	5.1218	5.26331	-0.141517
1416249_at	1.3811e-28	6.10056	5.9912	0.109359		1434054_at	4.88091e-20	4.00292	4.02422	-0.0212947		1455024_at	3.52929e-14	9.27732	9.35686	-0.0795413
1418468_at	1.59653e-28	9.87686	9.43224	0.444615		1437102_at	4.9311e-20	3.99274	4.10797	-0.11523		1448613_at	3.98935e-14	5.90806	6.15752	-0.249462
1428789_at	1.65824e-28	7.90421	8.10009	-0.195878		1418133_at	5.00955e-20	9.70194	9.28998	0.41196		1437692_x_at	4.27814e-14	7.36147	7.52696	-0.165488
1417218_at	1.67128e-28	7.67962	7.29844	0.381179		1427131_s_at	5.30177e-20	7.87731	7.79971	0.0775991		1458308_at	4.30664e-14	6.97476	6.98313	-0.00836681
1455197_at	1.698e-28	8.2549	8.57866	-0.323761		1425933_a_at	5.35574e-20	7.83229	7.31128	0.521002		1448559_at	4.39372e-14	5.18411	5.14244	0.0416727
1433699_at	1.76458e-28	5.32305	5.22394	0.0991064		1421235_s_at	5.61521e-20	8.33502	7.96885	0.366164		1428362_at	4.3951e-14	8.26396	8.7466	-0.482642
1415734_at	2.35142e-28	8.83029	9.11936	-0.289066		1435146_s_at	5.85708e-20	3.63554	3.5211	0.114446		1455470_x_at	4.43159e-14	5.24115	5.54818	-0.307033
1425128_at	2.4247e-28	7.05056	6.36525	0.685304		1455026_at	6.04553e-20	6.81399	6.66743	0.146568		1421287_a_at	5.19966e-14	6.46824	6.53602	-0.0677853
1434773_a_at	2.93478e-28	10.8069	10.9097	-0.102707		1416871_at	6.07874e-20	4.18504	4.13933	0.0457131		1420640_at	5.26437e-14	4.34747	4.51092	-0.163455
1456605_at	3.14031e-28	9.56556	7.74648	1.81908		1426672_at	6.28738e-20	8.32213	8.36138	-0.0392542		1459742_at	5.38637e-14	8.78812	8.35765	0.430468
1439348_at	3.19356e-28	4.11675	4.16804	-0.0512916		1424373_at	6.4838e-20	8.82678	8.4052	0.421578		1452831_s_at	5.40789e-14	5.72248	6.18873	-0.466253
1449455_at	3.26319e-28	6.77174	6.83547	-0.0637289		1453807_at	6.666e-20	7.91971	7.50601	0.413692		1439902_at	5.72644e-14	8.69173	8.65967	0.0320609
1423596_at	3.85508e-28	8.34909	8.30939	0.0396977		1436499_at	6.70486e-20	10.2252	9.13569	1.0895		1415922_s_at	5.81623e-14	2.88466	2.86468	0.0199803
1437956_at	3.93691e-28	3.67997	3.38631	0.293652		1448175_at	6.81132e-20	5.64128	5.71027	-0.0689912		1437056_x_at	5.86611e-14	9.57332	9.56296	0.0103656
1417894_at	4.05045e-28	7.71624	8.30183	-0.58559		1439188_at	7.00286e-20	4.28154	4.17398	0.107558		1417632_at	6.49713e-14	6.70378	6.73762	-0.0338406
1448511_at	4.05689e-28	6.4376	7.48849	-1.05089		1452617_at	7.1418e-20	4.56382	4.60502	-0.0412005		1416102_at	6.75247e-14	7.33692	8.78318	-1.44626
1452357_at	4.07418e-28	6.35281	6.24659	0.106215		1426312_at	7.64346e-20	3.67008	3.59634	0.0737385		AFFX-r2-Bs-dap-5_at	6.81227e-14	10.6156	10.4864	0.129207
1433634_at	4.08026e-28	6.65126	6.49233	0.158922		1443920_at	7.83464e-20	4.2242	4.05539	0.16881		1449491_at	6.98965e-14	5.47684	5.33718	0.13966
1449976_a_at	4.36934e-28	6.1017	5.17094	0.93076		1419508_at	8.04132e-20	2.95094	2.94549	0.00545239		1420331_at	7.08813e-14	7.28147	7.85397	-0.572499
1426599_a_at	4.36994e-28	8.81375	8.1903	0.623442		1454711_at	8.32873e-20	7.86959	7.41003	0.459558		1434015_at	7.17577e-14	12.3623	12.4268	-0.0645113
1416253_at	5.17116e-28	7.43085	7.69814	-0.267295		1460595_at	8.63028e-20	5.24602	5.13684	0.109174		1420624_a_at	7.34369e-14	8.16099	8.06698	0.0940186
1425837_a_at	6.27059e-28	5.39035	5.25807	0.132284		1444747_at	8.71902e-20	11.3775	11.4366	-0.059121		1418216_at	7.35303e-14	8.587	8.64399	-0.0569848
1420591_at	7.05365e-28	8.55632	8.28008	0.276232		1447329_at	8.73312e-20	5.65118	5.59181	0.0593735		1451041_at	7.38136e-14	7.53475	7.56756	-0.0328138
1419829_a_at	7.16775e-28	6.81055	6.88416	-0.0736025		1426642_at	9.38975e-20	8.55605	8.69173	-0.13568		1447944_at	7.8789e-14	3.90435	4.11957	-0.215223
1418703_at	7.16777e-28	6.25323	6.62523	-0.371991		1456500_at	9.80027e-20	10.4009	10.8888	-0.487943		1417288_at	7.9944e-14	7.19641	7.50675	-0.31034
1445687_at	7.39505e-28	6.77852	6.67064	0.107878		1417406_at	9.81641e-20	6.21163	5.75171	0.459925		1428790_at	8.04425e-14	5.09322	5.14233	-0.0491177
1427102_at	7.92483e-28	5.40834	4.67809	0.73025		1424256_at	1.05214e-19	12.113	9.08414	3.02886		1438925_x_at	8.49717e-14	8.15539	8.33908	-0.183697
1452487_x_at	7.92508e-28	4.9229	4.89403	0.0288676		1427016_at	1.06933e-19	12.2095	12.5279	-0.318341		1451426_at	8.7127e-14	8.48559	9.04856	-0.562969
1433657_at	8.06674e-28	3.58265	3.60713	-0.0244845		1440587_at	1.09071e-19	3.92372	3.92453	-0.000813796		1436921_at	9.01947e-14	8.4724	8.60684	-0.134439
1451079_at	8.7604e-28	6.40617	5.93302	0.473148		1456976_at	1.12518e-19	6.44817	6.45938	-0.011211		1418574_a_at	9.78145e-14	13.9985	13.9373	0.0612871
1421410_a_at	8.88938e-28	7.95003	7.55048	0.39955		1432826_a_at	1.15688e-19	6.51211	6.27738	0.234732		1456440_s_at	1.03129e-13	6.5173	6.31192	0.205386
1420649_at	1.04559e-27	12.5307	13.0495	-0.518838		1420852_a_at	1.23377e-19	7.26082	6.42308	0.83774		1458459_a_at	1.03398e-13	8.77494	8.28638	0.488565
1427327_at	1.39451e-27	6.07658	6.59868	-0.522108		1431645_a_at	1.28022e-19	6.16012	5.98538	0.174743		1448573_a_at	1.05181e-13	8.69103	8.67107	0.0199552
1441962_at	1.69373e-27	3.23984	3.09263	0.147208		1421871_at	1.31376e-19	5.40507	5.32561	0.0794604		1452143_at	1.06761e-13	7.49831	7.72955	-0.231236
1418747_at	1.86175e-27	7.10758	7.32712	-0.219533		1428759_s_at	1.319e-19	6.65434	6.36277	0.291574		1451775_s_at	1.07991e-13	7.37583	7.2703	0.105528
1426798_a_at	1.86951e-27	6.82967	6.57825	0.25142		1454984_at	1.37788e-19	5.16564	5.01226	0.153382		1454901_at	1.10354e-13	7.619	7.23545	0.383549
1451006_at	2.12236e-27	9.05686	8.3374	0.719462		1420012_at	1.41161e-19	6.98371	6.71699	0.266717		1452024_a_at	1.21772e-13	6.10845	6.10731	0.00114015
1448856_a_at	2.34273e-27	5.73601	5.74763	-0.0116272		1444213_at	1.4169e-19	5.85875	6.08927	-0.230518		1442212_at	1.23257e-13	3.15148	3.17556	-0.0240771
1449851_at	2.64611e-27	5.71009	5.98986	-0.279778		1448700_at	1.41938e-19	8.16521	8.45681	-0.291603		1433795_at	1.23571e-13	5.91961	6.14472	-0.225106
1449188_at	2.95441e-27	4.41228	4.42022	-0.00793892		1434280_at	1.43626e-19	5.30223	5.51787	-0.215639		1420864_at	1.2493e-13	9.00829	9.31919	-0.310898
1450297_at	3.03209e-27	5.0139	5.0373	-0.0233969		1447806_s_at	1.47144e-19	6.14039	5.99692	0.143474		1430311_at	1.2609e-13	11.7975	11.7213	0.0762239
1450200_s_at	3.20007e-27	4.59034	4.52787	0.0624714		1449731_s_at	1.51188e-19	4.81359	4.61698	0.196611		1425067_at	1.26411e-13	4.87332	4.87171	0.00161763
1420099_at	3.20194e-27	6.26236	6.57741	-0.315047		1441482_at	1.52144e-19	2.9805	3.14034	-0.159843		1458351_s_at	1.26568e-13	4.64928	4.60007	0.0492062
1427682_a_at	3.2078e-27	7.98117	8.75933	-0.778155		1421065_at	1.56918e-19	7.24612	7.1931	0.0530235		AFFX-DapX-5_at	1.31777e-13	8.48532	8.32288	0.162438
1451171_at	3.81667e-27	8.4809	8.62659	-0.145692		1452783_at	1.6685e-19	3.82921	3.87802	-0.0488108		1424826_s_at	1.32655e-13	10.8618	10.8648	-0.00306014
1449175_at	4.28584e-27	5.64071	5.72304	-0.0823289		1449616_s_at	1.67498e-19	5.48738	5.41314	0.0742341		AFFX-r2-Bs-thr-5_s_at	1.38397e-13	12.59	12.565	0.0250685
1427256_at	4.44933e-27	10.4196	10.7323	-0.312661		1456477_at	1.819e-19	9.26673	9.14862	0.118109		1422084_at	1.44742e-13	13.9359	13.8925	0.043438
1416655_at	4.48734e-27	8.41439	8.80841	-0.39402		1423213_at	1.84555e-19	7.6446	7.47282	0.171774		1422852_at	1.50398e-13	8.42406	8.69893	-0.274877
1426600_at	4.49405e-27	8.84786	8.36263	0.485231		1423017_a_at	1.87224e-19	6.26708	6.03282	0.234256		1437668_at	1.54396e-13	7.95384	7.9729	-0.0190619
1416527_at	5.13645e-27	8.90025	8.61992	0.280332		1435486_at	1.99519e-19	3.28735	3.66206	-0.374715		1452984_at	1.60071e-13	7.42075	5.6639	1.75685
1423411_at	5.6055e-27	5.37617	5.92423	-0.548061		1416992_at	2.00681e-19	10.246	10.093	0.152995		1418103_at	1.73939e-13	7.38257	7.65209	-0.269525
1451982_at	5.71054e-27	6.74532	6.84808	-0.102764		1449495_at	2.02335e-19	11.0671	11.2627	-0.195574		1421618_at	1.79121e-13	9.05826	9.20349	-0.145223
1434046_at	5.97672e-27	3.71754	3.7905	-0.0729649		1423161_s_at	2.04809e-19	6.63072	6.55065	0.0800684		1416904_at	1.79959e-13	8.53071	8.52584	0.00487089
1420425_at	6.72978e-27	6.98995	6.66588	0.324071		1440894_at	2.16032e-19	5.33469	5.22042	0.114267		1437956_at	1.85932e-13	7.31987	7.39564	-0.075763
1434318_a_at	7.44488e-27	5.16564	4.99229	0.173348		1460220_a_at	2.1631e-19	5.72832	5.80505	-0.0767356		1437886_at	1.88004e-13	8.5667	8.38805	0.178644
1417409_at	7.98692e-27	6.67153	6.69047	-0.0189425		1451715_at	2.5712e-19	10.0835	10.0695	0.0139593		1417190_at	1.94731e-13	7.70356	7.93588	-0.232322
1419493_a_at	8.86338e-27	3.11524	3.00549	0.109745		1430289_a_at	2.65349e-19	5.88773	4.64928	1.23845		1420764_at	1.98395e-13	6.52894	6.54494	-0.015995
1460330_at	9.25471e-27	4.90196	4.88332	0.0186417		1439565_at	2.68243e-19	3.675	3.42715	0.247856		1456545_at	2.27891e-13	7.10484	7.05738	0.0474555
1427683_at	1.11987e-26	9.29841	9.26763	0.0307758		1452045_at	2.73588e-19	6.84488	5.53791	1.30697		1452545_a_at	2.49863e-13	8.24627	8.35757	-0.111307
1460220_a_at	1.14627e-26	8.45077	9.00536	-0.55459		1448306_at	2.78658e-19	5.94154	5.91504	0.0264962		1437870_at	2.54254e-13	4.23397	4.43335	-0.199383
1449184_at	1.22571e-26	8.52682	8.69898	-0.172162		1423388_at	2.85091e-19	5.79959	5.43726	0.362335		1437016_x_at	2.72225e-13	6.12521	6.59755	-0.472341
1416435_at	1.39179e-26	8.35823	8.60075	-0.24252		1439313_at	2.91388e-19	8.98364	9.16544	-0.181802		1417458_s_at	2.75136e-13	7.89555	8.00937	-0.113812
1417230_at	1.50687e-26	6.61175	6.72164	-0.109886		1456980_at	2.92026e-19	3.44742	3.39107	0.0563554		1429352_at	2.78722e-13	9.57389	9.22679	0.347094
1422573_at	1.55474e-26	6.87528	7.0056	-0.130314		1459559_at	2.96994e-19	8.687	8.1589	0.528102		1421842_a_at	2.95533e-13	4.41334	4.55333	-0.139986
1460251_at	1.56566e-26	5.57534	5.63905	-0.0637123		1423043_s_at	3.08365e-19	5.18762	5.10002	0.0875978		1417291_at	3.04739e-13	9.38861	9.315	0.0736082
1430878_at	1.71711e-26	3.00794	3.25558	-0.247639		1422618_x_at	3.16634e-19	7.36061	7.47328	-0.112663		1456147_at	3.05942e-13	7.41994	7.36728	0.0526606
1427164_at	1.81311e-26	5.74082	5.66117	0.0796508		1422844_a_at	3.21287e-19	6.18071	6.15359	0.0271179		1448328_at	3.17868e-13	10.8641	10.6377	0.226382
1435793_at	1.85386e-26	4.88611	4.96095	-0.0748428		1431037_a_at	3.24054e-19	8.56118	8.26768	0.293506		1415830_at	3.1975e-13	8.46325	9.11936	-0.656103
1460243_at	1.86023e-26	4.95781	5.01705	-0.0592413		1416655_at	3.3498e-19	9.78383	9.60734	0.176487		1428346_at	3.27054e-13	8.31911	8.10677	0.212333
1418465_at	2.10119e-26	4.69001	4.72074	-0.0307281		1455373_at	3.42801e-19	3.35851	4.57062	-1.21211		1421844_at	3.289e-13	5.11251	5.18419	-0.0716787
1436101_at	2.1298e-26	5.25666	4.92899	0.32767		1423743_at	3.51784e-19	6.44187	6.20759	0.234276		1451451_at	3.29492e-13	7.52726	7.68306	-0.155799
1456980_at	2.18003e-26	7.8304	8.22409	-0.393685		1423078_a_at	3.52342e-19	7.97862	7.63554	0.343078		1428395_at	3.48156e-13	7.1355	7.15366	-0.0181572
1458933_at	2.57837e-26	2.49378	2.51294	-0.0191638		1450268_at	3.55964e-19	5.78193	5.77651	0.00541437		1428329_a_at	3.51054e-13	6.56758	7.0395	-0.471919
1449947_s_at	2.79466e-26	13.304	13.5212	-0.217246		1434556_at	3.67958e-19	5.35965	5.33084	0.0288094		1420999_at	3.55848e-13	8.21879	8.29836	-0.0795684
1416248_at	2.93466e-26	10.1751	9.87938	0.29576		1428289_at	3.80709e-19	6.00428	6.09449	-0.090201		1419369_at	3.56344e-13	6.08917	6.4433	-0.354139
1437921_x_at	3.09666e-26	6.48181	6.55283	-0.0710143		1425604_at	3.87164e-19	3.18649	3.34579	-0.1593		1417164_at	3.5775e-13	7.83358	7.6988	0.134778
1452783_at	3.11554e-26	3.79761	3.781	0.0166054		1417985_at	3.99331e-19	12.5324	12.7186	-0.186286		1423592_at	3.67151e-13	8.49971	8.26347	0.236237
1450165_at	3.17458e-26	5.09774	5.11099	-0.0132423		1417434_at	4.00933e-19	10.3996	10.0312	0.368449		1434036_at	3.7469e-13	6.98346	7.0892	-0.105739
1452301_at	3.27731e-26	2.3537	2.33912	0.0145757		1426646_at	4.01566e-19	7.39068	7.03684	0.35384		1434794_at	3.76239e-13	3.97028	4.06241	-0.0921331
1421863_at	3.31244e-26	6.23465	6.37738	-0.142731		1431036_a_at	4.15612e-19	6.25779	6.27486	-0.0170737		1434945_at	3.81406e-13	6.73965	6.29695	0.442696
1428357_at	3.31679e-26	5.69928	5.75588	-0.0566012		1448192_s_at	4.43053e-19	6.75589	6.56309	0.1928		1416359_at	3.90659e-13	7.13225	7.24155	-0.1093
1444312_at	3.5898e-26	5.14625	5.25975	-0.113503		1460287_at	4.53426e-19	7.69897	6.3348	1.36418		1449711_at	4.07413e-13	7.59206	7.64154	-0.0494858
1429352_at	3.73114e-26	5.90018	5.49986	0.400325		1423800_at	4.84922e-19	3.8876	3.92087	-0.0332628		1452952_at	4.23158e-13	7.28508	7.16483	0.120251
1434496_at	4.01101e-26	7.22592	6.88543	0.340486		1415678_at	5.15518e-19	8.04394	6.89264	1.1513		1419494_a_at	4.42058e-13	4.04556	4.59733	-0.55177
1452952_at	4.087e-26	6.58694	6.6366	-0.0496668		1431393_at	5.46183e-19	3.80756	4.00626	-0.198694		1448881_at	4.58328e-13	6.38094	6.6403	-0.259365
1424444_a_at	4.94278e-26	6.63072	6.72613	-0.09541		1423241_a_at	5.53536e-19	10.0928	7.39167	2.70115		1417793_at	4.67743e-13	3.06123	3.22914	-0.167904
1424343_a_at	4.97123e-26	8.32085	8.04812	0.272722		1426680_at	5.70043e-19	3.03011	3.08744	-0.0573285		1427515_at	4.6999e-13	6.32407	6.67113	-0.347063
1452045_at	5.73612e-26	3.80398	3.83099	-0.027009		1448462_at	5.72634e-19	6.82927	6.35846	0.470811		1429525_s_at	5.06051e-13	2.98714	3.00353	-0.0163903
1416165_at	5.75072e-26	9.46621	9.35011	0.116101		1448437_a_at	5.7394e-19	3.05998	3.03887	0.0211121		1419004_s_at	5.27514e-13	11.2367	11.1561	0.0806279
1420641_a_at	5.90634e-26	9.50828	9.5095	-0.00122283		1417218_at	5.78841e-19	5.28591	4.04556	1.24034		1417894_at	5.31193e-13	8.31231	8.60355	-0.291238
1457404_at	6.21936e-26	6.65666	6.38413	0.27253		1447181_s_at	5.8299e-19	5.30181	5.28782	0.0139894		1451798_at	5.37608e-13	7.16024	7.1522	0.00804281
1427418_a_at	6.23913e-26	6.45944	6.63837	-0.178929		1440806_x_at	5.89333e-19	6.66322	6.7239	-0.0606783		1451777_at	5.92346e-13	3.72299	3.72324	-0.000253242
1421694_a_at	6.75638e-26	6.00666	6.14968	-0.143017		1455432_at	5.97654e-19	5.2366	5.00571	0.230897		1454961_at	6.1484e-13	3.9484	4.51389	-0.565492
1437113_s_at	7.04632e-26	3.66519	3.70055	-0.0353646		1452093_at	6.68748e-19	6.08212	6.07983	0.0022898		1420481_at	6.34509e-13	7.4082	7.40432	0.00387793
1434005_at	7.34371e-26	8.31014	8.24616	0.0639806		1421547_at	6.93008e-19	9.35924	9.22602	0.133227		1457679_at	6.6368e-13	6.75574	6.74068	0.0150605
1424781_at	8.54208e-26	5.57171	5.34381	0.2279		1432143_a_at	7.1691e-19	9.27509	9.13608	0.139012		1423364_a_at	6.67261e-13	6.73973	6.63618	0.103549
1452160_at	8.66938e-26	9.47387	9.08465	0.389224		1435674_at	7.2383e-19	3.00232	3.24347	-0.241154		1426191_a_at	7.09388e-13	8.22762	8.11342	0.1142
1448993_at	8.77072e-26	4.90167	4.91467	-0.012994		1436611_at	7.31708e-19	7.06924	6.77957	0.28967		1434758_at	7.16221e-13	6.2267	6.59868	-0.371981
1433711_s_at	1.14933e-25	5.26131	5.43116	-0.169849		1449581_at	8.19479e-19	10.5299	10.4866	0.0432745		1416844_at	7.17823e-13	6.19433	6.42948	-0.235149
1460598_at	1.16624e-25	4.88359	4.70124	0.182345		1456212_x_at	8.31902e-19	8.00165	7.93818	0.0634673		1448445_at	7.31083e-13	8.61333	8.30939	0.303936
1417566_at	1.24542e-25	10.3996	10.2718	0.127878		1452569_at	8.64411e-19	2.98478	2.84486	0.139922		1425698_a_at	7.36176e-13	7.7314	8.23032	-0.498914
1419561_at	1.38075e-25	7.65771	7.56613	0.0915858		1430302_at	8.72979e-19	3.38057	3.45432	-0.073755		1416378_at	7.43377e-13	6.62241	6.76096	-0.13855
1435517_x_at	1.43781e-25	4.94807	4.67473	0.273338		1419297_at	8.75464e-19	10.8936	10.8569	0.0366967		1460279_a_at	7.73446e-13	3.36415	3.34255	0.0215959
1448559_at	1.4751e-25	5.13661	5.05995	0.0766567		1423361_at	8.9747e-19	5.01922	4.74418	0.275045		1426678_at	7.88687e-13	6.3217	6.38772	-0.0660204
1443816_s_at	1.56676e-25	4.69103	4.73139	-0.0403663		1446149_at	9.06801e-19	3.91679	3.98042	-0.0636293		1448219_a_at	8.00753e-13	8.33027	8.21034	0.119937
1417695_a_at	1.62315e-25	9.17507	8.99638	0.178685		1457793_a_at	9.21886e-19	6.00841	5.89609	0.112323		1450298_at	8.22208e-13	7.39383	7.54044	-0.146603
1422122_at	1.82274e-25	3.3176	3.42095	-0.103355		1446617_at	9.30356e-19	5.42117	5.39598	0.0251873		1460694_s_at	8.29777e-13	8.46188	9.24586	-0.783987
1434432_at	1.86608e-25	5.8815	5.24622	0.635284		1421895_at	9.51679e-19	9.21221	9.25287	-0.0406537		1433854_at	8.34479e-13	8.20805	8.55394	-0.345894
1451767_at	2.16363e-25	6.00087	5.80256	0.198308		1427567_a_at	1.00724e-18	4.92099	5.04975	-0.128759		1427165_at	8.3609e-13	4.89063	5.16975	-0.279119
1448210_at	2.21173e-25	9.91847	9.95466	-0.0361855		1456798_at	1.01013e-18	3.89552	3.93852	-0.0430054		1437313_x_at	9.20078e-13	5.07387	5.00134	0.0725304
1423267_s_at	2.24792e-25	5.54887	4.12258	1.42629		1422508_at	1.06576e-18	9.63444	9.88461	-0.250176		1440481_at	9.23992e-13	8.23139	8.39403	-0.16264
1442804_at	2.31643e-25	3.85987	3.40425	0.455618		1429318_a_at	1.08764e-18	4.32726	4.06694	0.260318		1416936_at	9.3053e-13	11.9605	11.9683	-0.00781475
1424424_at	2.35753e-25	6.09858	6.08089	0.0176945		1426576_at	1.11506e-18	5.73239	5.58394	0.148454		1426600_at	9.35076e-13	5.35431	5.54008	-0.185772
1420380_at	2.5041e-25	7.48278	6.58653	0.896244		1460329_at	1.12001e-18	7.89594	7.87072	0.0252192		1425216_at	9.6645e-13	9.79905	10.0411	-0.242082
1435450_at	2.57657e-25	3.38488	3.38826	-0.00338049		1427722_at	1.15767e-18	4.05624	3.90435	0.151896		1443816_s_at	9.96227e-13	5.40531	5.59606	-0.190748
1430143_at	2.82096e-25	5.45583	5.5256	-0.069777		1417564_at	1.16106e-18	9.17507	8.89968	0.27539		1441254_at	1.0457e-12	3.71613	4.39742	-0.681286
1453239_a_at	2.89582e-25	6.4994	6.4943	0.00510027		1454897_at	1.28312e-18	5.82266	5.72276	0.099902		1419757_at	1.04731e-12	9.54594	9.55468	-0.00874405
1448190_at	3.19615e-25	7.11835	6.98466	0.133686		1422052_at	1.29589e-18	4.81241	4.7221	0.0903081		1448025_at	1.08713e-12	7.65081	7.61004	0.0407731
1419494_a_at	3.61689e-25	11.2905	11.1656	0.124945		1432745_at	1.30359e-18	3.13308	3.30501	-0.171927		1424199_at	1.09966e-12	6.11121	6.00926	0.101954
1450009_at	3.68252e-25	7.3282	7.6653	-0.337098		1423536_at	1.30464e-18	6.49056	6.46173	0.0288243		1418891_a_at	1.18597e-12	8.43577	7.80572	0.630049
1434402_at	4.40813e-25	6.21874	5.93899	0.27975		1454095_at	1.30997e-18	6.38758	6.71427	-0.326691		1451171_at	1.23338e-12	8.7285	8.86328	-0.134776
1448694_at	4.41643e-25	7.68377	7.64272	0.0410586		1460039_at	1.31345e-18	5.68432	5.65797	0.0263528		1451525_at	1.2829e-12	5.72553	5.81468	-0.0891559
1428942_at	4.50832e-25	6.26323	6.26689	-0.00365623		1422617_at	1.34727e-18	8.59313	8.77908	-0.185947		1448239_at	1.28302e-12	5.57822	5.68271	-0.104494
1419654_at	4.94184e-25	9.27735	9.1844	0.0929548		1459478_at	1.37388e-18	4.66732	4.66066	0.00665843		1418099_at	1.32488e-12	4.77027	4.52288	0.247391
1425822_a_at	5.0193e-25	6.15098	6.04235	0.108638		1430143_at	1.4204e-18	5.97839	5.87949	0.0988967		1460237_at	1.34952e-12	7.55972	7.68435	-0.124632
1448724_at	5.89086e-25	6.58282	6.71334	-0.130523		1447778_x_at	1.43045e-18	5.22316	5.33177	-0.10861		1435690_at	1.37021e-12	7.12503	7.37918	-0.254151
1459961_a_at	5.99549e-25	6.25637	6.41803	-0.161665		1426818_at	1.50801e-18	7.35116	7.285	0.0661573		1435415_x_at	1.39936e-12	5.44268	5.44291	-0.000221175
1418798_s_at	6.01506e-25	8.552	8.69636	-0.144357		1450214_at	1.52634e-18	5.08215	4.95675	0.125397		1416985_at	1.40193e-12	7.57504	7.69814	-0.123099
1448786_at	6.03596e-25	12.0033	11.2629	0.740374		1455603_at	1.6066e-18	3.43368	3.45807	-0.0243896		1450124_a_at	1.46272e-12	6.05781	6.35335	-0.295541
1422518_at	6.97896e-25	7.5827	7.11469	0.468004		1421479_at	1.61154e-18	6.22755	5.89201	0.335538		1450424_a_at	1.52822e-12	4.54704	4.67913	-0.132087
1450322_s_at	7.53027e-25	3.16363	3.20719	-0.0435628		1422122_at	1.61317e-18	13.7181	13.8622	-0.144023		1452542_x_at	1.56361e-12	3.9943	4.09892	-0.104617
1420997_a_at	7.59879e-25	4.9961	5.00957	-0.0134693		1427683_at	1.66352e-18	6.69053	6.4284	0.262127		1460598_at	1.57353e-12	7.97587	8.40265	-0.426779
1435031_at	7.69337e-25	5.03158	4.91671	0.11487		1443038_at	1.70986e-18	4.83835	4.80149	0.0368657		1419609_at	1.58064e-12	10.6308	10.8576	-0.226813
1427442_a_at	7.90422e-25	6.07501	6.19061	-0.115603		1422726_x_at	1.71688e-18	3.3983	3.53085	-0.132548		1415982_at	1.58117e-12	10.8736	10.7824	0.0911685
1456135_s_at	8.03098e-25	4.491	4.53301	-0.0420118		1450377_at	1.77672e-18	5.7379	5.89577	-0.157869		1422028_a_at	1.65368e-12	5.44393	5.26601	0.177919
1454961_at	8.60069e-25	8.09127	8.10996	-0.0186861		1443595_at	1.81733e-18	5.00785	5.04653	-0.0386874		1453585_at	1.66133e-12	6.93227	7.24844	-0.316161
1416378_at	8.9289e-25	7.98276	7.93588	0.0468711		1439344_at	1.99484e-18	5.28693	5.35556	-0.0686231		1420361_at	1.69707e-12	10.9128	10.832	0.0807859
1455665_at	9.13328e-25	5.57874	5.35468	0.224057		1431904_at	2.04783e-18	5.56127	5.56819	-0.00692053		1456846_at	1.6984e-12	6.52925	6.53686	-0.00761473
1423326_at	1.03105e-24	6.60373	6.44896	0.154776		1436449_at	2.05735e-18	7.89322	8.11674	-0.223521		1416248_at	1.7098e-12	5.33433	5.46412	-0.129791
1450081_x_at	1.06074e-24	8.82366	8.72973	0.0939321		1451458_at	2.07986e-18	6.73461	7.18303	-0.448421		1418401_a_at	1.71838e-12	10.0549	10.3185	-0.263662
1454897_at	1.07149e-24	6.36628	6.47954	-0.113253		1427614_at	2.09871e-18	7.61799	7.70036	-0.0823698		1426774_at	1.71962e-12	9.57142	9.34758	0.223837
1425067_at	1.10013e-24	6.4268	6.43544	-0.00863589		1436463_at	2.10855e-18	10.0485	9.61711	0.431365		1440384_at	1.74288e-12	6.62599	6.81508	-0.18909
1416082_at	1.12366e-24	8.70989	8.41489	0.294999		1443129_at	2.1139e-18	6.39176	6.50562	-0.113859		1429321_at	1.77128e-12	4.95639	5.32322	-0.366828
1430558_at	1.12426e-24	5.66444	5.37196	0.292488		1454342_at	2.21828e-18	10.5515	10.3061	0.245356		1423297_at	1.78121e-12	8.52878	8.6479	-0.119114
1426755_at	1.17993e-24	4.7828	4.81993	-0.0371359		1417586_at	2.24656e-18	9.53441	9.31207	0.222334		1449259_at	1.9286e-12	5.48938	5.28421	0.205171
1421479_at	1.21224e-24	6.45315	6.17376	0.279389		1449089_at	2.28376e-18	3.07487	3.20581	-0.130941		1434814_x_at	1.97372e-12	7.75154	7.88062	-0.129078
1448061_at	1.22609e-24	7.35389	6.59142	0.762472		1453181_x_at	2.31425e-18	4.49325	4.52688	-0.0336341		1424698_s_at	2.01362e-12	6.91993	6.87577	0.0441606
1440900_at	1.48067e-24	2.78041	2.72919	0.0512154		1432667_at	2.31642e-18	6.79566	5.74096	1.0547		1450006_at	2.05175e-12	8.73876	8.94925	-0.21049
1456466_x_at	1.51241e-24	5.74928	5.91041	-0.161131		1455729_at	2.32703e-18	2.94952	2.90019	0.0493238		1418646_at	2.06362e-12	13.1992	13.0947	0.104509
1441317_x_at	1.52108e-24	8.44005	8.35315	0.086903		1420033_s_at	2.47284e-18	8.55632	7.95762	0.598699		1423466_at	2.09515e-12	7.64507	7.58417	0.0609045
1448534_at	1.53065e-24	8.45365	8.17139	0.282261		1437964_at	2.4899e-18	3.26198	3.26761	-0.00562696		1417114_at	2.20062e-12	11.6341	11.9116	-0.277479
1437421_at	1.5915e-24	4.0272	4.07605	-0.0488489		1431887_at	2.50194e-18	5.33275	5.30458	0.0281716		1419168_at	2.23496e-12	13.6523	13.6275	0.0248073
1435077_at	1.60403e-24	6.76902	7.2832	-0.514186		1433142_at	2.51897e-18	9.24724	9.16431	0.0829334		1450049_a_at	2.29771e-12	5.16447	5.16544	-0.000969543
1444459_at	1.66897e-24	5.31983	5.37026	-0.050433		1451160_s_at	2.80384e-18	5.97047	5.70255	0.267928		1454771_at	2.44117e-12	4.35694	4.71098	-0.354046
1438171_x_at	1.70395e-24	4.20922	4.17219	0.0370369		1418649_at	2.81496e-18	5.27781	3.98721	1.2906		1420866_at	2.53633e-12	7.54152	7.51629	0.0252294
1428381_a_at	1.80869e-24	9.33314	10.7299	-1.39673		1459647_at	2.93226e-18	8.11351	7.97099	0.142517		1417544_a_at	2.6502e-12	12.0921	11.9856	0.106453
1426377_at	1.95996e-24	5.29265	5.41591	-0.123258		1426575_at	2.97671e-18	7.45723	6.9575	0.499731		1449303_at	2.65974e-12	2.49828	2.47681	0.021466
1417710_at	2.17183e-24	7.53533	7.6239	-0.0885699		1418163_at	3.06433e-18	7.4084	6.16065	1.24775		1456403_at	2.85264e-12	8.38252	8.50208	-0.119564
1426473_at	2.3917e-24	5.79135	5.84978	-0.0584231		1431018_at	3.07058e-18	6.57823	6.59389	-0.0156571		1417588_at	2.90011e-12	7.22443	7.41027	-0.185836
1451713_a_at	2.54334e-24	7.60007	7.50948	0.0905939		1424942_a_at	3.13403e-18	9.28782	9.3998	-0.111979		1423059_at	2.94314e-12	3.07446	3.03109	0.0433682
1433976_at	2.76052e-24	4.6371	4.69275	-0.0556449		1455899_x_at	3.26545e-18	4.32333	4.23603	0.0872997		1418402_at	2.94521e-12	8.81675	8.7786	0.0381415
1451775_s_at	2.82229e-24	6.46937	5.51466	0.954712		1456341_a_at	3.30591e-18	9.68429	9.56954	0.114749		1456063_at	3.05135e-12	4.91507	5.24447	-0.329394
1448861_at	3.02779e-24	6.20147	5.33971	0.861759		1458423_at	3.48447e-18	4.15847	4.28469	-0.126222		1418518_at	3.0855e-12	3.16258	3.07926	0.0833165
1417190_at	3.46491e-24	9.67535	10.0139	-0.338594		1418819_at	3.56343e-18	6.66601	6.50618	0.15983		1451669_at	3.08684e-12	6.42853	6.53161	-0.10308
1449677_s_at	3.47485e-24	6.01956	6.00204	0.0175208		1455830_s_at	3.72499e-18	5.11016	4.95664	0.153519		1415972_at	3.13628e-12	9.54178	9.43992	0.101856
1426299_at	3.57509e-24	8.1626	8.43397	-0.271369		1430587_at	3.79139e-18	4.07192	4.09214	-0.0202207		1421299_a_at	3.2417e-12	10.3755	10.0797	0.295803
1423722_at	3.95718e-24	4.01291	3.98564	0.0272696		1431225_at	3.85164e-18	2.5874	2.61871	-0.0313096		1449269_at	3.2934e-12	5.99563	6.25609	-0.260468
1426717_at	3.98005e-24	7.72655	7.71679	0.0097685		1428487_s_at	3.9238e-18	3.72161	3.72001	0.00159879		1460735_at	3.40176e-12	8.13435	8.20544	-0.0710884
1458206_at	4.7133e-24	3.69304	3.72523	-0.0321934		1448210_at	3.97654e-18	7.22513	7.06717	0.157954		1429192_at	3.50373e-12	7.94979	7.78661	0.163184
1422557_s_at	4.95445e-24	6.4491	5.54313	0.905969		1416360_at	4.03047e-18	8.90025	8.44414	0.456107		1424775_at	3.58109e-12	8.13886	8.0793	0.0595555
1417272_at	5.49211e-24	7.50062	7.37236	0.128267		1430324_x_at	4.15239e-18	7.21663	7.07496	0.141668		1428087_at	3.59554e-12	5.33653	5.46601	-0.129479
1418505_at	5.78268e-24	9.59213	9.55009	0.0420387		1458392_at	4.25007e-18	6.26586	6.3669	-0.101044		1450934_at	3.6085e-12	6.93704	7.32441	-0.387367
1421478_a_at	5.96827e-24	5.82962	5.75771	0.0719127		1452767_at	4.34528e-18	8.29156	8.25936	0.032201		1438634_x_at	3.63484e-12	6.70312	6.6758	0.02732
1420012_at	6.06886e-24	7.65	7.58537	0.0646217		1430467_at	4.39299e-18	7.79456	7.54152	0.25304		1434350_at	3.72575e-12	3.34579	3.24608	0.0997141
1421304_at	6.19558e-24	6.40598	6.67113	-0.265145		1452162_at	4.52633e-18	5.90584	5.94535	-0.0395143		1448309_at	3.74067e-12	3.76151	3.79679	-0.0352869
1437692_x_at	6.46995e-24	3.86636	3.79751	0.0688474		1451317_at	4.58285e-18	5.58502	5.66435	-0.079329		1450877_at	3.74996e-12	6.82654	7.05928	-0.232741
1437152_at	6.49241e-24	8.03427	7.78045	0.253812		1445061_at	4.80042e-18	8.30944	7.84334	0.466101		1423885_at	3.94738e-12	10.8262	10.8416	-0.0154227
1454799_at	6.50467e-24	6.01876	5.87439	0.144364		1421701_at	4.97333e-18	7.81928	7.92405	-0.104777		1425503_at	3.97281e-12	5.84617	5.94564	-0.0994684
1428669_at	6.86186e-24	4.46447	4.43335	0.0311105		1425045_at	4.98882e-18	8.27893	8.36863	-0.0897083		1434290_at	4.1656e-12	8.07431	7.01975	1.05456
1439797_at	6.95416e-24	6.44882	6.17401	0.27481		1417123_at	5.01706e-18	11.0839	11.0776	0.00629702		1424081_at	4.2448e-12	4.90445	4.91975	-0.0153034
1448175_at	7.07833e-24	6.72613	5.89374	0.832391		1443254_at	5.11484e-18	8.18596	8.36029	-0.174323		1427417_at	4.2473e-12	4.24057	4.24811	-0.00753157
1424779_at	8.19246e-24	6.89852	6.81009	0.0884335		1450882_s_at	5.17252e-18	6.82516	6.70076	0.124399		1430878_at	4.24846e-12	6.54031	6.52876	0.0115437
1416011_x_at	8.40632e-24	11.4149	11.5907	-0.175811		1417613_at	5.24789e-18	5.22543	5.11739	0.108041		1448204_at	4.39208e-12	4.99924	5.05993	-0.0606822
1426554_a_at	8.50372e-24	6.10333	5.86304	0.240298		1437231_at	5.25283e-18	11.7179	10.4493	1.26859		1457707_at	4.41854e-12	3.98942	4.05633	-0.0669098
1450826_a_at	8.69506e-24	5.02318	5.07498	-0.0517976		1449363_at	5.32502e-18	6.64418	6.4915	0.152685		1419603_at	4.50198e-12	4.83842	4.72711	0.111309
1453119_at	8.74385e-24	2.90357	2.96219	-0.0586208		1459401_at	5.39068e-18	6.23438	6.24212	-0.0077439		1433711_s_at	4.53177e-12	3.14687	3.11819	0.0286769
1421392_a_at	8.87969e-24	4.70819	4.75574	-0.0475543		1431825_at	5.56882e-18	2.96049	2.94881	0.0116838		1423558_at	4.58936e-12	4.77781	4.81051	-0.0326987
1436515_at	9.11205e-24	2.37666	2.449	-0.0723378		1449091_at	5.84388e-18	8.99683	8.88971	0.107117		1436788_at	4.62889e-12	9.48085	9.45391	0.0269456
1456545_at	9.67893e-24	12.8463	13.0891	-0.24276		1450982_at	5.8901e-18	10.0095	8.04146	1.96805		1436747_at	4.66788e-12	5.17957	5.15381	0.0257597
1455002_at	9.97601e-24	6.71222	6.4229	0.289322		1429337_at	5.90663e-18	5.53515	5.27715	0.257999		1452410_a_at	4.74029e-12	3.92087	3.79214	0.128723
1455773_at	1.00316e-23	4.42587	4.31838	0.107492		1418970_a_at	5.96591e-18	6.94028	6.89108	0.049196		1443136_at	4.9521e-12	7.87842	8.03172	-0.153302
1453721_a_at	1.16596e-23	8.74491	6.16706	2.57785		1425465_a_at	6.02084e-18	10.5185	10.3246	0.193887		1449552_at	5.26782e-12	8.91636	8.24338	0.672974
1460510_a_at	1.2205e-23	5.78433	6.28191	-0.497579		1442023_at	6.06302e-18	3.99631	3.94243	0.0538803		1455309_at	5.35102e-12	14.1073	14.1774	-0.0700413
1416700_at	1.23397e-23	4.44663	4.52288	-0.0762409		1448648_at	6.10566e-18	6.72148	6.76053	-0.0390526		1415983_at	5.61749e-12	12.3096	12.3251	-0.0155681
1420981_a_at	1.23417e-23	5.31062	5.17275	0.137875		1418835_at	6.14734e-18	7.86243	7.64507	0.217355		1417110_at	5.83196e-12	7.94983	8.02946	-0.0796322
1448936_at	1.27392e-23	5.16698	4.92977	0.237206		1453280_at	6.18577e-18	10.1708	10.0816	0.0891966		1456586_x_at	5.9062e-12	2.92371	2.71833	0.205385
1452814_at	1.27595e-23	4.97662	4.96379	0.0128314		1453737_at	6.34915e-18	8.44951	8.62416	-0.174647		1426457_at	5.95114e-12	8.02062	8.23079	-0.210167
1428094_at	1.37023e-23	7.58518	7.26477	0.320411		1458828_at	6.38059e-18	9.21405	8.80528	0.408766		1452844_at	6.12837e-12	6.39293	7.10825	-0.715321
1443906_at	1.40131e-23	11.301	10.7634	0.537643		1420197_at	6.4423e-18	8.7978	8.29874	0.499057		1455197_at	6.13574e-12	5.28454	5.52246	-0.23792
1436334_at	1.44284e-23	3.15871	3.21496	-0.0562576		1418576_at	6.71647e-18	8.20763	7.91453	0.293103		1436358_at	6.2427e-12	4.44237	4.3514	0.0909713
1452093_at	1.48755e-23	8.99683	8.84261	0.154217		1429993_s_at	6.76901e-18	7.09555	6.77883	0.316719		1427695_a_at	6.35266e-12	5.35626	5.08005	0.276208
1448165_at	1.60159e-23	4.46989	4.49679	-0.026903		1428545_at	7.1328e-18	8.03427	7.58024	0.45403		1449265_at	6.49873e-12	11.5117	11.9024	-0.390644
1421411_at	1.61574e-23	6.19946	5.9722	0.227258		1459239_at	7.26923e-18	6.89982	6.876	0.0238199		1460014_at	6.54109e-12	6.89956	7.15191	-0.252355
1434814_x_at	1.64276e-23	6.98999	6.86873	0.121267		1434402_at	7.42659e-18	8.99388	9.24695	-0.253066		1450393_a_at	6.93163e-12	3.70996	3.75927	-0.0493127
1450964_a_at	1.66567e-23	7.84656	7.83107	0.0154894		1420376_a_at	7.51411e-18	9.8115	9.3926	0.418901		1421408_at	7.03358e-12	8.45026	8.29946	0.150799
1428837_at	1.67666e-23	6.35547	6.13815	0.217315		1427663_a_at	7.67727e-18	3.02001	3.61573	-0.595723		1442643_at	7.29756e-12	7.59861	7.80649	-0.207873
1426648_at	1.70522e-23	8.27893	8.24044	0.0384829		1431491_at	7.72933e-18	2.30707	2.31398	-0.00690664		1418612_at	7.40607e-12	8.18842	8.21864	-0.0302169
1424780_a_at	1.81651e-23	5.19616	5.31338	-0.117229		1419766_at	7.74749e-18	5.10672	4.29578	0.810945		1435456_at	7.40915e-12	7.31128	7.12431	0.186977
1418401_a_at	1.92315e-23	6.88526	6.53448	0.350777		1439046_at	7.76199e-18	5.77598	5.60052	0.175465		1429524_at	7.43495e-12	7.01641	6.90443	0.111983
1421352_at	1.96821e-23	10.5756	10.656	-0.0803582		1420088_at	7.76934e-18	5.72927	5.99115	-0.261887		1448862_at	7.52214e-12	5.26916	5.48048	-0.211316
1415983_at	2.08151e-23	10.7876	10.9501	-0.162509		1416472_at	7.98957e-18	8.41439	8.71435	-0.299962		1421578_at	7.80628e-12	12.3405	12.6649	-0.324402
1419922_s_at	2.17812e-23	6.18659	6.39953	-0.212943		1447490_at	8.13149e-18	3.96126	3.7513	0.209959		1456540_s_at	8.29569e-12	7.3056	7.45049	-0.144898
1448561_at	2.29732e-23	6.66515	6.67892	-0.0137729		1429527_a_at	8.24828e-18	5.494	5.5284	-0.0343951		1416273_at	8.45011e-12	7.24656	7.15492	0.0916391
1425609_at	2.38142e-23	7.35108	8.09439	-0.743304		1452899_at	8.30977e-18	2.80368	3.10234	-0.298669		1421256_at	8.57149e-12	4.56957	4.57741	-0.00783444
1435010_at	2.48151e-23	9.10722	9.48118	-0.373964		1441468_at	8.37325e-18	5.06515	5.05811	0.00703439		1450971_at	8.75459e-12	3.25586	3.40854	-0.152681
1442514_a_at	2.64479e-23	5.83706	6.14307	-0.306011		1443639_at	8.59564e-18	5.03776	5.04422	-0.00646491		1425551_at	8.79645e-12	5.8765	5.90032	-0.0238171
1455353_at	2.85232e-23	6.42488	6.35588	0.0689947		1423613_at	8.72845e-18	6.4268	6.41771	0.00909266		1421843_at	8.99975e-12	7.13261	7.31617	-0.183557
1423161_s_at	3.20071e-23	6.31051	6.12252	0.187984		1429033_at	8.7348e-18	6.53355	6.72651	-0.192959		1456398_at	9.50953e-12	10.0372	9.57046	0.466697
1420624_a_at	3.35733e-23	7.13498	6.15105	0.983933		1453851_a_at	9.06351e-18	5.9996	5.86132	0.138272		1423017_a_at	9.81385e-12	6.29549	6.62523	-0.329731
1426899_at	3.38552e-23	6.54306	6.13335	0.40971		1419532_at	9.12097e-18	10.2553	10.3536	-0.0982415		1416380_at	1.01025e-11	7.65562	7.55449	0.101128
1437848_x_at	3.42658e-23	5.88773	4.60007	1.28765		1454815_at	9.41299e-18	7.17619	6.80011	0.376072		1450484_a_at	1.0111e-11	9.19397	9.39947	-0.205501
1434272_at	3.54282e-23	4.56928	4.74617	-0.176893		1451108_at	9.4153e-18	5.9431	5.70086	0.242234		1439671_at	1.04227e-11	5.33245	5.44791	-0.115469
1457644_s_at	3.82874e-23	5.28693	5.52102	-0.234091		1437214_at	9.51412e-18	7.43804	7.42449	0.0135481		1438640_x_at	1.06595e-11	4.04975	4.12258	-0.0728247
1450939_at	3.84042e-23	11.3657	11.8963	-0.530533		1447552_s_at	1.00432e-17	4.62251	4.54049	0.0820151		1448689_at	1.12722e-11	4.00166	3.98564	0.016016
1422631_at	4.11221e-23	4.83007	4.90448	-0.0744162		1423996_a_at	1.02521e-17	6.48984	6.30031	0.189536		1418722_at	1.15408e-11	13.2385	13.2752	-0.0366746
1440162_x_at	4.19329e-23	3.63668	3.72446	-0.0877788		1426798_a_at	1.03321e-17	5.15499	4.62451	0.530475		1417074_at	1.18421e-11	8.98784	8.94734	0.0404926
1418809_at	4.98057e-23	9.488	9.31202	0.175977		1455405_at	1.03986e-17	5.62572	5.80012	-0.174402		1433504_at	1.1851e-11	4.60502	4.72872	-0.123709
1416992_at	5.13786e-23	8.27896	7.89273	0.386231		1440837_at	1.04227e-17	4.49388	4.3529	0.140984		1450015_x_at	1.19336e-11	10.1961	10.1947	0.00142497
1425406_at	5.16143e-23	6.17466	5.83972	0.334939		1422504_at	1.08156e-17	9.25089	9.09859	0.152302		1418154_at	1.20396e-11	6.68629	7.1534	-0.467109
1449840_at	5.61064e-23	14.0534	14.1322	-0.0787576		1428137_at	1.10194e-17	5.68131	5.47934	0.201972		1455665_at	1.24267e-11	8.50575	8.46005	0.0457037
1439814_at	5.74051e-23	2.38466	2.49274	-0.108079		1429351_at	1.10387e-17	3.80736	3.87086	-0.0634961		1417840_at	1.2838e-11	7.88422	8.3876	-0.503375
1447181_s_at	6.08755e-23	4.17086	4.17104	-0.000174562		1449832_at	1.12162e-17	4.09068	4.02608	0.0645984		1425895_a_at	1.29884e-11	6.90994	7.04714	-0.137201
1439946_at	6.40835e-23	2.99465	2.95674	0.0379101		1438670_at	1.1667e-17	9.40255	9.38086	0.0216952		1460387_a_at	1.3017e-11	4.79826	4.77163	0.0266259
1448914_a_at	6.42351e-23	2.82127	2.80648	0.0147949		1441550_at	1.17941e-17	5.51347	5.64356	-0.130087		1454051_at	1.35375e-11	7.05949	7.11687	-0.0573728
1416982_at	6.52141e-23	13.8491	13.9373	-0.0881973		1418939_at	1.18211e-17	9.97343	9.73373	0.239697		1453153_at	1.35883e-11	3.3925	3.50163	-0.109129
1425289_a_at	6.93021e-23	6.91249	6.87535	0.0371354		1427767_a_at	1.20408e-17	2.67633	2.85686	-0.180531		1418555_x_at	1.36527e-11	10.4605	10.6855	-0.225043
1445420_at	6.9901e-23	7.54852	4.83978	2.70873		1449317_at	1.22808e-17	6.95939	6.85667	0.102715		1443071_at	1.41163e-11	5.04861	5.19818	-0.149575
1454606_at	7.21251e-23	6.19484	5.78589	0.408954		1421979_at	1.23019e-17	6.81961	6.58759	0.232016		1437921_x_at	1.4463e-11	9.60526	9.38218	0.223081
1419006_s_at	7.54608e-23	4.19904	4.04233	0.156718		1423905_at	1.23267e-17	6.17311	5.72248	0.45063		1420953_at	1.48818e-11	8.39754	8.73673	-0.339186
1415856_at	7.96097e-23	13.8733	13.5742	0.299123		1420372_at	1.23359e-17	6.19908	6.19498	0.00410187		1419132_at	1.51334e-11	7.3136	7.37236	-0.0587527
1425933_a_at	8.33746e-23	6.926	7.02873	-0.102731		1418797_at	1.24761e-17	7.76866	7.54565	0.223012		1448436_a_at	1.60522e-11	4.95181	5.00554	-0.053739
1428191_s_at	8.78676e-23	11.4103	11.0074	0.402943		1422961_at	1.28518e-17	6.23019	6.24771	-0.0175221		1418901_at	1.60651e-11	8.11989	8.04479	0.0750933
1418295_s_at	9.21156e-23	6.55618	5.98342	0.572766		1460460_a_at	1.28795e-17	3.62365	3.67265	-0.0490014		1439825_at	1.61694e-11	8.93975	8.98989	-0.050134
1434431_x_at	9.24504e-23	4.95946	5.07579	-0.116334		1447551_x_at	1.2991e-17	5.98417	6.193	-0.208831		1456888_at	1.63794e-11	4.06694	4.46733	-0.400389
1427348_at	9.47993e-23	3.72097	3.62404	0.0969315		1440862_at	1.30436e-17	4.54503	4.84028	-0.295253		1451651_at	1.65452e-11	8.47025	8.91458	-0.444332
1420621_a_at	9.88681e-23	6.69091	6.62997	0.0609382		1431610_at	1.32265e-17	7.47895	7.37471	0.104247		1443698_at	1.66161e-11	5.17615	5.43116	-0.255016
1424882_a_at	1.00756e-22	7.29654	7.38142	-0.0848773		1450087_a_at	1.33363e-17	4.81462	4.80567	0.00895541		1417361_at	1.67821e-11	8.2799	7.68566	0.59425
1456772_at	1.02974e-22	7.28754	7.19113	0.0964091		1431288_at	1.33466e-17	3.94958	3.94087	0.00870378		1421734_at	1.68787e-11	8.37369	8.81592	-0.442228
1422921_at	1.04445e-22	6.85949	6.66405	0.195443		1415828_a_at	1.33819e-17	5.3957	5.33433	0.0613658		1416249_at	1.70199e-11	7.01384	7.31002	-0.296184
1449254_at	1.09104e-22	9.09369	9.04063	0.0530658		1429889_at	1.34348e-17	6.71434	6.84427	-0.129929		1438744_at	1.70339e-11	7.08052	7.16528	-0.0847557
1420342_at	1.13841e-22	11.3911	11.7628	-0.371644		1450318_a_at	1.3811e-17	11.0729	9.77948	1.29344		1420591_at	1.73393e-11	6.789	7.07186	-0.282857
1434334_at	1.21452e-22	6.02902	6.05421	-0.0251974		1437920_at	1.38228e-17	6.0695	6.15001	-0.0805156		1417691_at	1.76256e-11	8.61884	8.80168	-0.182836
1452767_at	1.28685e-22	5.44349	5.03873	0.40476		1453832_at	1.38909e-17	8.63567	8.41772	0.217947		1434062_at	1.77672e-11	8.39923	8.62715	-0.227922
1422084_at	1.3515e-22	5.37088	5.77197	-0.401089		1450474_at	1.39486e-17	7.7882	7.20291	0.585298		1452860_at	1.78271e-11	7.88644	8.01737	-0.13093
1421968_a_at	1.3685e-22	6.59933	6.24422	0.355109		1435325_at	1.45125e-17	7.72872	7.33505	0.393675		1459857_at	1.81095e-11	11.2057	10.8852	0.320583
1420813_at	1.53762e-22	5.75241	5.80251	-0.0501021		1434070_at	1.45319e-17	5.28252	5.08369	0.198823		1448383_at	1.83125e-11	6.7553	6.88831	-0.133008
1418154_at	1.56472e-22	8.4104	7.97329	0.437108		1431055_a_at	1.45364e-17	8.66728	8.52942	0.137855		1448484_at	1.85318e-11	7.41811	7.40276	0.0153495
1450234_at	1.59979e-22	6.87531	7.02432	-0.149014		1427406_at	1.4726e-17	6.36268	6.09739	0.265289		1451159_at	1.87802e-11	6.88841	7.20232	-0.313909
1417500_a_at	1.69498e-22	3.21531	3.12799	0.0873214		1422264_s_at	1.47352e-17	8.18554	8.29805	-0.112508		1460674_at	1.90753e-11	6.73647	6.67201	0.0644588
1447806_s_at	1.8061e-22	2.6597	2.63483	0.0248697		1437575_at	1.51523e-17	6.63811	6.36595	0.272153		1449712_s_at	1.93317e-11	8.25508	8.38396	-0.128881
1448160_at	1.99266e-22	5.35181	5.43131	-0.0794998		1441714_at	1.52221e-17	5.51064	5.00719	0.503451		1434601_at	1.96466e-11	5.40934	5.32604	0.083303
1423100_at	2.0209e-22	5.91699	6.12579	-0.208797		1456021_at	1.55591e-17	7.31229	6.56093	0.751358		1425732_a_at	2.02638e-11	7.07985	7.58537	-0.505525
1446957_s_at	2.1976e-22	5.40353	5.56318	-0.15965		1430481_at	1.60275e-17	4.31384	4.37282	-0.058975		1418983_at	2.02898e-11	9.88469	10.0139	-0.129246
1458525_at	2.2304e-22	7.39582	7.17098	0.224832		1431804_a_at	1.61022e-17	8.34585	7.78423	0.561614		1431704_a_at	2.03376e-11	8.15285	8.09529	0.0575572
1454699_at	2.37457e-22	9.06326	9.22103	-0.157771		1427587_at	1.66889e-17	6.1111	6.34099	-0.229886		1429325_at	2.06261e-11	4.91211	5.33377	-0.421668
1421529_a_at	2.90115e-22	6.87901	6.83188	0.0471248		1451950_a_at	1.69077e-17	5.74655	5.18129	0.565267		1450461_at	2.18913e-11	3.08555	3.11211	-0.0265605
1420819_at	2.9349e-22	2.96954	3.05593	-0.0863916		1436511_at	1.70457e-17	5.32433	5.21563	0.10871		1421940_at	2.2028e-11	7.14261	7.2371	-0.0944915
1445870_at	3.02684e-22	5.71369	5.77572	-0.062027		1427147_at	1.71376e-17	5.92837	5.9298	-0.00142623		1452301_at	2.28802e-11	6.20759	6.20731	0.000285357
1421034_a_at	3.12169e-22	10.6139	10.8887	-0.274777		1451798_at	1.71404e-17	8.27201	8.15567	0.116336		1455134_at	2.33644e-11	3.49318	3.51251	-0.0193269
1432826_a_at	3.16562e-22	8.41101	7.97209	0.438912		1460341_at	1.74265e-17	7.93471	8.00796	-0.0732567		1434380_at	2.35522e-11	11.7039	12.0169	-0.312977
1420249_s_at	3.3901e-22	6.55835	6.34316	0.215185		1416369_at	1.75898e-17	5.72135	5.63743	0.0839183		1425406_at	2.37656e-11	6.30613	6.52498	-0.218846
1419909_at	3.39818e-22	7.65659	7.72083	-0.0642409		1460573_at	1.84752e-17	5.97734	6.01484	-0.0375028		1431760_a_at	2.45477e-11	6.58656	6.44971	0.13685
1448960_at	3.44501e-22	5.58708	5.35429	0.232787		1433657_at	1.85561e-17	3.60009	3.6777	-0.0776099		1440169_x_at	2.48112e-11	6.41241	6.62771	-0.215306
1422537_a_at	3.64402e-22	8.84372	8.5672	0.276519		1416701_at	1.87719e-17	6.41471	6.2852	0.129507		1417542_at	2.521e-11	5.5915	5.83736	-0.24586
1425850_a_at	3.89952e-22	12.113	7.65598	4.45702		1439224_at	1.96281e-17	3.77077	3.62959	0.141184		1419734_at	2.55219e-11	3.11473	3.12799	-0.0132577
1452246_at	3.95766e-22	6.95939	7.03905	-0.0796645		1445481_at	1.9696e-17	5.27559	5.28684	-0.0112524		1416539_at	2.56056e-11	8.29944	8.41489	-0.115455
1420361_at	4.0036e-22	7.82889	6.87692	0.951962		1460302_at	2.01398e-17	4.25002	3.05137	1.19865		1457404_at	2.64056e-11	5.5284	5.55975	-0.031357
1452161_at	4.09141e-22	3.81062	3.71443	0.0961861		1435368_a_at	2.05937e-17	4.41354	4.38103	0.0325046		1418577_at	2.77288e-11	9.36347	9.65513	-0.291661
1438044_at	4.1613e-22	2.96325	2.98021	-0.0169668		1421211_a_at	2.05946e-17	3.3176	3.4175	-0.0999042		1450262_at	2.7802e-11	5.36648	5.33159	0.0348893
1444705_at	4.16286e-22	8.82868	8.2723	0.556377		1435747_at	2.15436e-17	4.07276	3.95501	0.117754		1440921_at	2.81124e-11	3.67348	3.59315	0.0803341
1460273_a_at	4.92198e-22	6.55265	6.22268	0.329978		1430154_at	2.27402e-17	3.07395	3.07634	-0.00239721		1454699_at	2.86385e-11	4.19852	4.40424	-0.205724
1440837_at	5.05236e-22	4.6315	4.61504	0.016461		1420089_at	2.28475e-17	12.5307	13.0977	-0.566985		1435613_x_at	2.88103e-11	8.33846	8.30484	0.0336225
1448436_a_at	5.12917e-22	5.79693	5.73841	0.0585138		1420951_a_at	2.31496e-17	5.23243	4.58389	0.648536		1425486_s_at	3.2157e-11	7.60885	7.67784	-0.0689897
1423383_a_at	5.2224e-22	7.9036	8.27453	-0.370932		1448724_at	2.34497e-17	3.89404	3.88872	0.00531985		1426738_at	3.29802e-11	5.24225	5.72767	-0.48542
1419681_a_at	5.3157e-22	6.95166	6.73929	0.212377		1415741_at	2.38755e-17	11.373	11.2339	0.139093		1424044_at	3.30426e-11	7.35971	7.51926	-0.159549
1449485_at	5.32054e-22	2.634	2.62797	0.0060279		1432982_at	2.40816e-17	10.0273	9.51197	0.515342		1424613_at	3.36356e-11	7.32981	7.35089	-0.0210845
1436511_at	5.5248e-22	3.98289	3.97261	0.010277		1420893_a_at	2.43462e-17	10.832	11.0585	-0.22647		1435652_a_at	3.46972e-11	7.69927	7.58549	0.113787
1452281_at	5.67393e-22	9.6503	6.89669	2.75361		1417995_at	2.43983e-17	12.3111	12.3405	-0.0294035		1450675_at	3.48262e-11	8.2673	8.56368	-0.296384
1452197_at	5.89569e-22	5.60653	5.9397	-0.333171		1421411_at	2.48992e-17	6.37963	6.16657	0.213053		1448364_at	3.48912e-11	4.54175	4.52904	0.012712
1421291_at	5.9208e-22	4.30797	4.24811	0.0598659		1448187_at	2.51547e-17	6.45564	5.56085	0.894791		1434954_at	3.49094e-11	5.57941	5.60995	-0.0305361
1451507_at	6.37901e-22	6.36413	6.38312	-0.0189906		1440369_at	2.52711e-17	6.01839	6.83292	-0.814524		1427912_at	3.50704e-11	5.91706	5.75771	0.159347
1435490_at	6.5411e-22	10.2289	6.76605	3.46281		1422389_at	2.52714e-17	6.25376	6.00816	0.245602		1417597_at	3.55652e-11	6.09905	6.21674	-0.117695
1431339_a_at	6.71748e-22	7.21125	8.02706	-0.815806		1447284_at	2.57888e-17	2.91329	2.77263	0.140657		1424654_at	3.56815e-11	8.53528	8.17868	0.3566
1439352_at	7.46415e-22	6.04912	6.15617	-0.107052		1422046_at	2.58891e-17	5.21001	5.07387	0.136135		1437733_at	3.74625e-11	6.69484	6.95911	-0.264269
1454783_at	7.48728e-22	8.63017	8.11906	0.5111		1439457_x_at	2.63856e-17	9.55372	9.28779	0.265934		1452395_at	3.81359e-11	8.94105	8.94116	-0.000110515
1434774_at	7.61904e-22	5.63506	5.62364	0.0114193		1430501_at	2.72029e-17	3.1223	3.20664	-0.084335		1457579_at	3.89458e-11	12.3188	12.3914	-0.0725357
1436986_at	7.65346e-22	6.95896	7.12671	-0.167746		1448957_at	2.79853e-17	4.52214	4.56534	-0.0432023		1423598_at	3.93901e-11	8.14182	8.137	0.00482079
1454045_a_at	8.67242e-22	7.35514	7.02135	0.333788		1446960_at	2.80121e-17	7.82392	7.53579	0.288125		1419998_at	3.94255e-11	5.78676	5.78498	0.00178697
1434017_at	8.87178e-22	4.82777	5.16162	-0.333841		1423622_a_at	2.86326e-17	6.09411	6.10845	-0.014343		1418563_at	3.96105e-11	13.7907	13.747	0.0437153
1423996_a_at	9.21264e-22	9.42442	9.00731	0.417105		1441684_at	2.90604e-17	3.26932	3.3047	-0.0353758		1418939_at	3.97885e-11	4.46918	4.54225	-0.0730736
1425451_s_at	9.47596e-22	8.11491	7.89668	0.218232		1460330_at	2.91387e-17	5.54142	5.57207	-0.0306427		1452792_at	4.00078e-11	9.21925	9.74954	-0.530285
1434487_at	1.0156e-21	11.2415	11.8477	-0.606185		1459768_x_at	2.97459e-17	4.7627	4.80121	-0.0385154		1438728_at	4.01381e-11	5.06727	5.10832	-0.0410491
1455229_x_at	1.09156e-21	7.58844	7.61776	-0.029314		1418685_at	2.97874e-17	8.11948	7.90892	0.210559		1433968_a_at	4.14232e-11	8.20294	7.45126	0.751681
1418936_at	1.09827e-21	3.80965	3.11257	0.697076		1418963_at	2.98844e-17	7.50417	7.68622	-0.182052		1422879_at	4.32442e-11	8.03426	8.17792	-0.143658
1434103_at	1.21099e-21	5.86024	5.71309	0.147142		1415734_at	3.09145e-17	14.394	14.3643	0.0296286		1446957_s_at	4.51052e-11	6.42465	5.78059	0.644057
1425086_a_at	1.21669e-21	8.93759	8.67476	0.262833		1423170_at	3.14465e-17	8.12308	8.47413	-0.351045		1428866_at	4.79815e-11	5.01164	5.11319	-0.101554
1437270_a_at	1.24329e-21	5.2922	5.31397	-0.0217651		1423059_at	3.15632e-17	4.19748	4.03108	0.166394		1426167_a_at	4.89951e-11	7.49306	7.53431	-0.0412473
1438796_at	1.57201e-21	4.9886	4.98363	0.004975		1433976_at	3.16728e-17	3.59138	3.85767	-0.266287		1454894_at	4.91625e-11	5.28889	5.33433	-0.0454429
1457708_at	1.57362e-21	2.90399	3.04445	-0.140463		1445531_at	3.21212e-17	5.26921	5.1553	0.113909		1423801_a_at	5.00266e-11	5.68183	5.82231	-0.140484
1434503_s_at	1.70548e-21	8.20366	8.14181	0.0618511		1449514_at	3.26002e-17	3.19493	3.15117	0.043763		1428508_at	5.04107e-11	3.37397	3.30637	0.0675915
1419764_at	1.70655e-21	11.0648	10.0342	1.03057		1424524_at	3.30342e-17	7.24548	6.93956	0.305923		1440965_at	5.22758e-11	6.03303	6.21935	-0.186319
1449303_at	1.73348e-21	12.1975	12.7014	-0.503918		1436763_a_at	3.3458e-17	7.63303	7.79041	-0.157374		1453202_at	5.24718e-11	7.25564	7.43628	-0.180644
1456021_at	1.91211e-21	6.7541	6.00002	0.754086		1459075_at	3.44034e-17	5.57162	5.62162	-0.0499968		1442945_at	5.26465e-11	2.46594	2.46156	0.00438171
1422553_at	1.91384e-21	7.38704	6.09434	1.2927		1415686_at	3.51272e-17	3.42687	3.37792	0.0489467		1422880_at	5.29139e-11	8.00876	7.94723	0.0615302
1431825_at	1.96729e-21	5.16764	5.25053	-0.0828896		1429775_a_at	3.58335e-17	4.02311	4.05027	-0.0271572		1425281_a_at	5.49874e-11	7.19451	7.18298	0.0115332
1423160_at	1.98858e-21	12.1889	12.355	-0.166102		1433290_at	3.60946e-17	6.55648	6.41043	0.146043		1421694_a_at	5.50124e-11	6.94685	7.19156	-0.244714
1456479_at	2.09496e-21	6.09584	6.17387	-0.078032		1457895_at	3.66065e-17	7.23308	7.41967	-0.186583		1424759_at	5.58722e-11	7.45839	7.07375	0.384647
1429033_at	2.11329e-21	9.3027	9.19144	0.111263		1457645_at	3.74159e-17	3.94602	3.97066	-0.0246396		1419208_at	5.71752e-11	12.0777	12.0388	0.0388644
1435546_a_at	2.13209e-21	5.20959	4.75665	0.452944		1437060_at	3.86418e-17	7.46161	7.79056	-0.328951		1448561_at	5.75619e-11	7.78867	7.92254	-0.133868
1456426_at	2.17633e-21	10.4245	9.59709	0.827432		1431746_a_at	3.88004e-17	5.06093	4.96881	0.0921177		1426641_at	5.80806e-11	8.65756	8.58661	0.0709544
1452410_a_at	2.22136e-21	7.44162	7.29599	0.145639		1437576_at	3.88461e-17	8.69745	8.52629	0.171162		1460717_at	5.93378e-11	7.64865	7.9492	-0.30055
1456875_at	2.2255e-21	5.23797	5.57233	-0.334362		1443024_at	3.88763e-17	6.19067	6.2622	-0.0715369		1453572_a_at	5.98695e-11	3.69612	3.79216	-0.0960408
1440458_at	2.29061e-21	2.33306	2.32493	0.00812732		1455579_at	3.90628e-17	2.96743	2.91327	0.0541554		1450350_a_at	6.17541e-11	4.11132	4.15441	-0.0430931
1450792_at	2.49635e-21	6.30532	6.40351	-0.0981852		1435297_at	4.09084e-17	4.18585	4.35707	-0.171219		1436522_at	6.26037e-11	5.32561	5.43799	-0.112379
1459522_s_at	2.5067e-21	5.13944	5.25961	-0.120172		1420425_at	4.13046e-17	9.44415	9.08367	0.360483		1434372_at	6.27432e-11	3.27534	3.30379	-0.02845
1424759_at	2.52005e-21	3.90545	3.79051	0.114948		1426017_a_at	4.13233e-17	8.89891	9.38982	-0.49091		1419686_at	6.29788e-11	8.72931	7.69151	1.0378
1418992_at	2.75705e-21	10.0933	9.44196	0.651389		1438157_s_at	4.16147e-17	6.75054	6.76477	-0.0142281		1460338_a_at	6.34295e-11	4.88494	4.83256	0.0523771
1434772_at	2.86833e-21	6.82776	6.6495	0.178262		1424882_a_at	4.20672e-17	9.60459	9.63906	-0.0344666		1436039_at	6.43754e-11	6.15894	6.25216	-0.0932204
1425977_a_at	2.89942e-21	6.91725	6.99708	-0.0798312		1431252_a_at	4.3017e-17	3.93113	4.10565	-0.17452		1434438_at	6.47981e-11	6.82247	7.6897	-0.86723
1423569_at	2.99661e-21	8.6095	7.85908	0.750421		1434350_at	4.31547e-17	9.01869	9.00035	0.0183364		1417357_at	6.48448e-11	7.61378	6.98226	0.631519
1427144_at	3.0068e-21	4.35302	4.2559	0.0971267		1451767_at	4.31702e-17	7.06645	7.51009	-0.443644		1442145_at	6.49345e-11	7.13963	7.04614	0.0934928
1450634_at	3.01966e-21	5.87211	5.7051	0.16701		1421715_at	4.55663e-17	4.67717	3.87442	0.802754		1452163_at	6.5194e-11	7.56154	7.56434	-0.00279774
1426988_at	3.13898e-21	9.66613	9.13938	0.526743		1457676_at	4.61521e-17	6.46789	6.32589	0.142009		1440856_at	6.63039e-11	10.7287	10.5927	0.136
1421947_at	3.15254e-21	7.24612	7.21959	0.0265368		1460381_at	4.7403e-17	5.25666	4.85323	0.403431		1418392_a_at	6.65823e-11	6.14512	6.06788	0.077242
1419655_at	3.17552e-21	8.03326	7.94277	0.0904872		1456055_x_at	4.81817e-17	4.99228	4.83848	0.153806		1436103_at	6.67741e-11	5.84882	5.76842	0.0804011
1423228_at	3.22601e-21	4.78019	4.78117	-0.000972964		1421720_a_at	4.8187e-17	7.01325	6.96255	0.0506967		1415689_s_at	6.75135e-11	8.39352	9.90584	-1.51231
1434260_at	3.22726e-21	5.2136	5.12317	0.0904386		1457644_s_at	4.91709e-17	8.75189	8.74065	0.0112419		1418930_at	6.87384e-11	8.10932	7.77044	0.338885
1435176_a_at	3.45141e-21	7.26323	5.6639	1.59933		1449427_at	5.07387e-17	3.25227	3.33399	-0.0817184		1454730_at	6.91427e-11	8.55927	8.40819	0.151081
1424344_s_at	3.49598e-21	4.92718	4.67913	0.248049		1450192_at	5.1102e-17	8.47202	8.65946	-0.187438		1429955_at	7.0537e-11	4.8283	4.81993	0.00836549
1439098_at	3.53765e-21	2.52778	2.49032	0.0374603		1453924_a_at	5.18747e-17	5.55959	4.86273	0.696861		1418652_at	7.06155e-11	4.99326	5.04238	-0.0491208
1416699_at	3.90594e-21	5.51014	5.67316	-0.16302		1451982_at	5.41602e-17	5.01186	5.0119	-4.3593e-05		1449025_at	7.16559e-11	6.65214	6.68358	-0.0314334
1457753_at	3.9174e-21	5.29225	5.28161	0.0106386		1446065_at	5.46889e-17	5.50745	5.53665	-0.0292023		1449029_at	7.4142e-11	6.28288	6.47904	-0.196155
1428466_at	4.00509e-21	6.24408	6.13014	0.11394		1433745_at	5.53144e-17	7.95758	7.7001	0.257486		1431745_a_at	7.48674e-11	10.944	10.9134	0.0306292
1455658_at	4.08833e-21	3.26198	3.28683	-0.0248492		1449109_at	5.54708e-17	3.78801	3.55163	0.236385		1449099_at	7.63373e-11	8.41378	8.5124	-0.0986149
1428985_at	4.14624e-21	5.97647	3.78215	2.19432		1440546_at	5.69211e-17	4.79838	4.86745	-0.0690658		1455439_a_at	7.76932e-11	9.25255	9.34589	-0.0933418
1455320_at	4.18583e-21	6.30539	6.42181	-0.116418		1418911_s_at	5.85909e-17	2.94392	2.91155	0.032369		1417189_at	8.09365e-11	13.4037	13.4201	-0.0164176
1436103_at	4.33388e-21	4.78678	4.75009	0.0366876		1456688_at	5.91031e-17	6.46627	6.24508	0.221199		1438475_at	8.14465e-11	8.05465	7.85474	0.19991
1454046_x_at	4.45683e-21	5.47695	5.76124	-0.28429		1421417_s_at	5.96564e-17	3.11345	3.14687	-0.0334158		1424819_a_at	8.2465e-11	7.36236	7.56613	-0.203763
1446860_at	4.54936e-21	5.30789	5.23822	0.0696702		1422560_at	5.97597e-17	7.3171	7.20287	0.114224		1428796_at	8.45576e-11	11.9004	11.9453	-0.0448492
1437313_x_at	4.58449e-21	6.48743	6.35102	0.136406		1436058_at	6.17823e-17	5.89254	5.57336	0.319187		1434581_at	8.4762e-11	6.83235	6.60561	0.226741
1424724_a_at	4.59195e-21	7.23837	6.98101	0.257358		1444703_at	6.17993e-17	2.45883	2.59792	-0.139089		1426415_a_at	8.61657e-11	9.15826	9.5095	-0.351245
1429503_at	4.6209e-21	4.84016	4.59268	0.247481		1444542_at	6.23212e-17	3.56678	3.99732	-0.430544		1436122_at	8.90109e-11	5.50192	5.13222	0.369697
1433453_a_at	4.76436e-21	9.05661	8.51444	0.542168		1450829_at	6.29506e-17	3.818	3.95411	-0.13611		1420607_at	9.12449e-11	6.5925	6.78046	-0.187956
1437277_x_at	4.78366e-21	6.07599	6.14703	-0.0710372		1459718_x_at	6.30923e-17	7.96218	7.52626	0.435916		1446834_at	9.19553e-11	5.04975	4.9848	0.0649499
1428141_at	4.82125e-21	4.37717	4.39719	-0.0200188		1429559_at	6.33552e-17	5.63618	5.66358	-0.0273937		1452267_at	9.21945e-11	6.91704	6.9293	-0.0122541
1421578_at	4.8604e-21	7.26082	6.73149	0.529324		1423364_a_at	6.49646e-17	8.17724	8.11556	0.061677		1439435_x_at	9.29289e-11	8.5976	8.62665	-0.029047
1437253_at	5.15777e-21	2.5636	2.71833	-0.154728		1447473_at	6.72219e-17	5.49284	5.46152	0.0313212		1424339_at	9.80899e-11	5.62812	6.04384	-0.415717
1429588_at	5.18898e-21	5.20954	4.63831	0.571232		1452814_at	6.76024e-17	4.98378	5.08547	-0.101686		1451839_a_at	9.81261e-11	6.37994	6.67118	-0.291241
1448790_at	5.38251e-21	6.88177	7.18731	-0.305537		1423316_at	6.88519e-17	5.08689	4.64377	0.443113		1451342_at	9.91777e-11	5.41016	5.34381	0.0663544
1455555_at	5.62386e-21	6.94915	6.86738	0.0817715		1428514_at	6.94293e-17	2.22119	2.28408	-0.0628861		1443935_at	9.98846e-11	5.46653	5.73917	-0.272642
1429029_at	5.77684e-21	6.15666	5.94156	0.2151		1456544_at	6.95226e-17	5.10423	5.116	-0.0117695		1454633_at	1.00758e-10	6.5653	6.6456	-0.080301
1433454_at	5.83515e-21	7.28629	7.33394	-0.047651		1433499_at	7.18024e-17	5.61701	5.71289	-0.0958875		1452357_at	1.00828e-10	6.69996	6.87535	-0.175391
1427417_at	6.10007e-21	6.71312	6.78638	-0.073263		1426310_at	7.28457e-17	5.3397	5.07275	0.266953		1423917_a_at	1.01564e-10	8.35063	7.3191	1.03153
1441328_at	6.12254e-21	2.96049	2.93442	0.0260687		1425611_a_at	7.35176e-17	6.35834	6.88825	-0.529913		1436008_at	1.05679e-10	7.7595	8.07658	-0.317076
1426112_a_at	6.19445e-21	7.74576	7.82449	-0.0787343		1451276_at	7.41322e-17	5.52168	5.59221	-0.0705244		1442098_at	1.08722e-10	4.63428	4.68166	-0.0473863
1450905_at	6.51004e-21	4.00144	4.00889	-0.0074468		1449838_at	7.43201e-17	6.68401	6.68667	-0.00266013		1420502_at	1.09025e-10	8.821	8.50479	0.31621
1422704_at	6.69974e-21	5.96128	6.24123	-0.279953		1451301_at	7.44256e-17	4.92016	5.0026	-0.0824367		1453562_a_at	1.10804e-10	7.79906	7.46646	0.332597
1415963_at	6.80855e-21	10.7503	10.6071	0.14319		1459943_at	7.50229e-17	3.00354	3.03183	-0.0282939		1437561_at	1.14515e-10	4.96957	5.07795	-0.108382
1456432_at	6.89866e-21	3.95294	3.89871	0.0542285		1425469_a_at	7.6766e-17	7.68031	7.78924	-0.108929		1444040_at	1.15913e-10	5.32251	5.41557	-0.0930572
1442004_at	7.11413e-21	7.16391	6.28051	0.883401		1440068_at	7.71079e-17	4.06493	4.01463	0.0502923		1439067_at	1.16623e-10	5.51701	5.49986	0.0171573
1450829_at	7.6599e-21	2.93259	2.95404	-0.0214405		1418505_at	7.84911e-17	9.56582	9.46	0.105825		1448356_at	1.18047e-10	9.88461	9.90656	-0.0219479
1460006_at	7.72251e-21	4.08633	4.13603	-0.0497025		1432116_at	7.87592e-17	3.27677	3.34244	-0.0656696		1431037_a_at	1.18785e-10	7.41781	7.59118	-0.173372
1417601_at	7.9685e-21	11.8399	12.2329	-0.393032		1423301_at	7.91931e-17	8.1645	6.56329	1.60121		1436019_a_at	1.20052e-10	9.58138	9.95057	-0.369195
1427368_x_at	8.07808e-21	4.50007	5.15104	-0.650971		1436590_at	7.92771e-17	9.58756	9.41369	0.173872		1450090_at	1.20121e-10	8.04516	7.99852	0.0466395
1426799_at	8.29103e-21	13.9134	13.5758	0.337664		1450868_at	7.96424e-17	6.34461	6.22426	0.120357		1454741_s_at	1.20313e-10	7.69153	7.50062	0.19091
1434521_at	8.76248e-21	4.91878	5.10413	-0.185347		1421222_at	8.50945e-17	3.42105	3.32266	0.0983868		1435732_x_at	1.21512e-10	6.55187	6.58476	-0.0328841
1454893_at	9.43318e-21	5.75498	5.7667	-0.0117169		1417191_at	8.66467e-17	13.4877	13.4898	-0.00201914		1445388_at	1.22128e-10	5.92159	5.90401	0.0175747
1453586_at	1.00713e-20	11.6446	9.82966	1.81498		1439684_at	8.81185e-17	4.04583	3.93078	0.115043		1438868_at	1.22375e-10	3.20688	3.14906	0.0578119
1452870_at	1.01301e-20	5.7765	5.5461	0.230397		1433171_at	9.00028e-17	5.82072	5.91736	-0.0966368		1421352_at	1.24523e-10	12.6912	12.6489	0.0422993
1424698_s_at	1.02033e-20	6.24034	7.05556	-0.815213		1435031_at	9.16921e-17	4.68614	4.71832	-0.0321819		1460458_at	1.317e-10	7.73104	7.8857	-0.154652
1437309_a_at	1.02717e-20	4.32726	4.46733	-0.14007		1430782_at	9.18336e-17	4.8324	4.78694	0.0454572		1450923_at	1.35355e-10	9.23301	8.67289	0.560129
1425674_a_at	1.02721e-20	6.75195	7.42847	-0.676518		1419727_at	9.61987e-17	13.0608	13.2025	-0.141694		1456605_at	1.35447e-10	7.72239	7.97028	-0.247888
1426300_at	1.04614e-20	4.68969	4.58634	0.10335		1416094_at	9.64438e-17	8.4043	8.25396	0.150342		1449435_at	1.37555e-10	7.31975	7.23622	0.0835251
1447792_x_at	1.05882e-20	10.4059	9.87258	0.533348		1419267_at	9.69975e-17	5.19289	5.20415	-0.0112623		1431694_a_at	1.40325e-10	6.77719	7.16608	-0.388894
1449712_s_at	1.06619e-20	6.0695	6.08495	-0.0154481		1444627_at	9.76492e-17	3.65673	3.78009	-0.123362		1456870_at	1.40892e-10	7.56029	7.1294	0.430885
1442023_at	1.07441e-20	5.95682	5.61868	0.338135		1439902_at	9.8365e-17	4.80134	4.71504	0.0863002		1418131_at	1.4576e-10	10.8971	10.9704	-0.0732804
1448462_at	1.10747e-20	5.30223	5.66342	-0.361195		1444927_at	9.98079e-17	6.81271	6.34686	0.465855		1451264_at	1.47718e-10	8.11556	8.12268	-0.00712084
1426721_s_at	1.11774e-20	7.74555	7.68015	0.0654087		1423041_a_at	1.01236e-16	5.06116	5.16447	-0.103306		1437506_at	1.48757e-10	10.3332	10.7299	-0.39667
1427165_at	1.12727e-20	7.38736	7.41429	-0.0269296		1430323_at	1.02223e-16	3.06421	3.50077	-0.436557		1451564_at	1.49037e-10	4.08402	3.97042	0.113599
1435596_at	1.17113e-20	5.93177	5.71199	0.219777		1434819_at	1.05617e-16	2.69696	2.70045	-0.00349186		1437404_at	1.49099e-10	7.9234	7.94042	-0.0170133
1437023_at	1.2077e-20	3.51461	3.45506	0.0595579		1431262_at	1.0583e-16	6.90679	6.89956	0.00723583		1423018_at	1.52025e-10	9.63659	9.59216	0.0444267
1433842_at	1.22586e-20	5.31999	5.27312	0.0468688		1416573_at	1.06356e-16	9.68909	10.1641	-0.474983		1425294_at	1.52852e-10	8.4139	8.19384	0.220056
1454685_at	1.24613e-20	7.68907	7.43242	0.256644		1457955_at	1.06581e-16	7.01088	6.92924	0.0816333		1454733_at	1.55989e-10	5.08532	5.11871	-0.0333833
1423293_at	1.24871e-20	9.95199	9.60146	0.350533		1424509_at	1.08189e-16	5.72709	5.67998	0.0471116		1437811_x_at	1.61343e-10	7.53254	7.55545	-0.0229077
1424852_at	1.25926e-20	5.58078	5.61368	-0.0328998		1426722_at	1.09644e-16	6.09242	6.12652	-0.0341021		1426482_at	1.6409e-10	13.1042	13.1287	-0.0245221
1419222_at	1.26078e-20	8.88724	8.92957	-0.0423291		1441071_at	1.11222e-16	4.0453	3.92569	0.119611		1451905_a_at	1.68673e-10	5.29788	5.33902	-0.0411409
1422978_at	1.27955e-20	5.78813	5.83307	-0.0449352		1435739_at	1.11331e-16	3.2895	3.24513	0.0443671		1453313_at	1.68917e-10	3.08771	3.68768	-0.599971
1436317_at	1.33054e-20	9.15396	10.0395	-0.885586		1421593_at	1.14064e-16	3.26201	3.27534	-0.0133291		1417713_at	1.69967e-10	5.77392	5.78708	-0.013166
1423466_at	1.40594e-20	9.92721	7.39478	2.53243		1459246_at	1.14942e-16	7.34301	7.19663	0.146381		1435518_at	1.71813e-10	8.9413	9.2126	-0.271306
1437380_x_at	1.41729e-20	5.65844	5.57631	0.0821304		1420331_at	1.20919e-16	6.80914	6.57149	0.237653		1455555_at	1.75434e-10	4.90123	4.65417	0.247063
1433428_x_at	1.41749e-20	7.35116	7.32266	0.0285029		1439662_at	1.21683e-16	8.67056	8.23647	0.434096		1452015_at	1.83505e-10	8.64399	8.67476	-0.0307714
1448429_at	1.4729e-20	6.16825	6.31306	-0.144811		1453195_at	1.2257e-16	2.43708	2.45659	-0.0195088		1419573_a_at	1.8768e-10	6.65837	6.69047	-0.0321066
1419716_a_at	1.64493e-20	6.47152	6.44983	0.0216944		1448532_at	1.22588e-16	6.68823	6.68236	0.00587826		1417171_at	1.87843e-10	8.3389	8.28183	0.0570726
1442827_at	1.64557e-20	4.09817	4.1743	-0.0761223		1422418_s_at	1.22798e-16	8.85145	8.86787	-0.0164197		1454931_at	1.88698e-10	3.30165	3.4366	-0.134956
1459903_at	1.68213e-20	6.22457	6.30133	-0.0767626		1458206_at	1.25051e-16	3.24467	3.36399	-0.119319		1456502_at	1.90881e-10	6.38718	6.54293	-0.155753
1422046_at	1.7003e-20	6.65676	6.79785	-0.14109		1450844_at	1.28153e-16	6.22457	5.38201	0.842554		1434078_at	1.91287e-10	6.78482	7.0056	-0.220779
1459900_at	1.73569e-20	10.015	10.2704	-0.255474		1417936_at	1.28628e-16	8.59065	8.45026	0.140389		1425483_at	1.93352e-10	7.59629	7.90463	-0.308341
1422931_at	1.75775e-20	8.98867	9.02777	-0.0391002		1440655_at	1.28692e-16	6.0753	6.12704	-0.0517412		1417483_at	1.93754e-10	6.32711	6.50455	-0.177437
1450446_a_at	1.81237e-20	3.78942	3.75902	0.0303938		1431658_at	1.29689e-16	3.35693	3.424	-0.0670713		1431772_a_at	1.9407e-10	6.14536	6.31722	-0.171852
1457728_at	1.89125e-20	7.08638	7.32979	-0.243408		1452237_at	1.33187e-16	13.2963	13.3379	-0.0416011		1426780_at	2.00423e-10	3.95386	3.96232	-0.00846959
1428279_a_at	2.05574e-20	7.26949	7.05093	0.218561		1426473_at	1.34254e-16	7.2343	7.08052	0.15378		1431577_at	2.02111e-10	4.54502	4.89792	-0.352899
1427765_a_at	2.0899e-20	5.12289	5.36543	-0.24254		1457129_at	1.35262e-16	11.8625	11.9747	-0.11229		1434737_at	2.07854e-10	5.7031	5.82265	-0.11955
1426818_at	2.09552e-20	9.34316	8.79576	0.54739		1458069_at	1.41919e-16	4.99118	5.38063	-0.389449		1433453_a_at	2.13464e-10	5.38599	5.276	0.109986
1419823_s_at	2.15906e-20	7.73602	7.67784	0.0581816		1437577_at	1.48957e-16	9.44137	8.85116	0.590217		1421845_at	2.14367e-10	5.57927	5.68639	-0.107117
1422272_at	2.17718e-20	8.60771	8.4291	0.178605		1440981_at	1.49164e-16	3.96364	3.94257	0.0210667		1434830_at	2.17086e-10	9.62598	10.084	-0.458025
1434430_s_at	2.18666e-20	3.09995	3.35932	-0.259366		1442773_at	1.50315e-16	6.69027	7.35893	-0.668652		1449947_s_at	2.18147e-10	6.95846	6.54892	0.409546
1450262_at	2.24075e-20	6.08966	6.09225	-0.00258759		1431147_at	1.51651e-16	9.30204	9.33946	-0.0374249		1439146_s_at	2.18466e-10	8.01602	7.39123	0.624788
1416536_at	2.29455e-20	8.66992	8.61985	0.0500726		1426565_at	1.52648e-16	5.6852	5.76295	-0.0777556		1422438_at	2.20164e-10	4.70988	4.72074	-0.0108577
1428645_at	2.49194e-20	4.94272	4.77364	0.169084		1450742_at	1.53002e-16	6.13418	6.06221	0.0719654		1425663_at	2.21305e-10	6.24216	6.32876	-0.0865999
1418248_at	2.64686e-20	6.13402	6.21509	-0.0810709		1446629_at	1.5538e-16	9.70522	10.3634	-0.658163		1417804_at	2.28757e-10	3.80522	3.81113	-0.00590895
1454963_at	2.664e-20	8.47202	9.09847	-0.626453		1459903_at	1.5593e-16	7.1764	7.44572	-0.269319		1418685_at	2.29055e-10	14.1132	14.1002	0.0130548
1418835_at	2.6761e-20	8.09742	7.90215	0.195272		1420073_s_at	1.5782e-16	6.26063	5.3803	0.880327		1455658_at	2.32375e-10	5.05433	4.96232	0.0920064
1424700_at	2.89852e-20	7.15206	7.20232	-0.0502622		1427882_at	1.60695e-16	3.50751	3.3925	0.115007		1450054_at	2.39794e-10	8.0983	8.25667	-0.158367
1416035_at	2.93937e-20	8.167	7.78691	0.380088		1437696_at	1.6121e-16	5.64056	5.47745	0.163112		1442206_at	2.40175e-10	6.67598	6.78364	-0.107657
1426865_a_at	3.01121e-20	5.53384	5.44906	0.0847815		1421491_a_at	1.63087e-16	6.97697	6.98346	-0.00649322		1416797_at	2.43038e-10	7.3817	7.40195	-0.0202524
1451451_at	3.0291e-20	2.81527	2.79035	0.0249205		1433938_at	1.63255e-16	4.38497	4.28362	0.101358		1418842_at	2.43469e-10	4.33	4.4591	-0.129094
1451015_at	3.04321e-20	7.04375	6.66914	0.374609		1437309_a_at	1.68862e-16	8.11711	7.96808	0.149029		1441230_at	2.4455e-10	8.0897	8.3032	-0.213496
1428231_at	3.35972e-20	5.00162	4.96306	0.0385552		1451306_at	1.68889e-16	6.37056	5.82337	0.547192		1428018_a_at	2.4764e-10	4.46635	4.52145	-0.055108
1424906_at	3.41347e-20	6.6102	5.69613	0.914072		1429997_at	1.72167e-16	7.30288	6.92849	0.37439		1448937_at	2.47745e-10	6.00108	6.23138	-0.230296
1451208_at	3.61451e-20	5.02312	4.74494	0.278177		1430667_at	1.76022e-16	6.91111	6.8002	0.110908		1450480_a_at	2.51216e-10	6.35352	6.34439	0.00913596
1438627_x_at	3.65414e-20	8.59003	8.35765	0.232381		1434502_x_at	1.88497e-16	3.81869	3.89418	-0.0754858		1450431_a_at	2.52588e-10	7.43873	7.5525	-0.11377
1419607_at	3.72546e-20	11.0493	11.239	-0.189716		1446392_at	1.93746e-16	2.87976	3.00979	-0.130028		1434883_at	2.5289e-10	3.87442	4.09114	-0.21672
1456403_at	3.74655e-20	4.13273	4.08668	0.0460549		1425563_s_at	1.96635e-16	5.60642	4.87013	0.736293		1435398_at	2.55625e-10	9.34738	9.26763	0.0797454
1454775_at	3.89685e-20	6.14277	5.96847	0.174302		1416281_at	1.98524e-16	7.2583	7.48513	-0.226836		1438006_at	2.57225e-10	5.0883	5.11577	-0.0274711
1438781_at	4.17988e-20	7.04929	7.27366	-0.224371		1438007_at	1.98705e-16	10.03	10.1206	-0.0906038		1455583_at	2.57279e-10	7.41452	7.72771	-0.313191
1440346_at	4.21166e-20	3.7984	3.82734	-0.0289418		1459295_at	1.99902e-16	8.28447	7.67708	0.60739		1457674_at	2.57715e-10	6.0553	6.07778	-0.0224794
1418890_a_at	4.23591e-20	6.66601	6.59825	0.0677645		1426301_at	2.07317e-16	9.33314	10.3332	-1.00006		1444333_at	2.62653e-10	4.98359	5.00503	-0.0214403
1416381_a_at	4.31823e-20	9.39598	9.79387	-0.397895		1429370_a_at	2.07435e-16	5.65844	5.57889	0.0795505		1423870_at	2.65304e-10	6.98064	7.17047	-0.189829
1455606_at	4.35157e-20	2.97791	2.97241	0.00549238		1427348_at	2.08182e-16	4.18929	4.0738	0.115483		1450291_s_at	2.66895e-10	5.62194	6.37518	-0.75324
1425668_a_at	4.43352e-20	9.39505	9.45204	-0.0569896		1415819_a_at	2.18002e-16	4.32612	4.48061	-0.154485		1423675_at	2.66905e-10	9.58767	9.44196	0.14571
1425037_at	4.47964e-20	5.42889	5.42294	0.00594325		1446860_at	2.21278e-16	4.51407	4.46646	0.0476082		1426680_at	2.67993e-10	9.3926	9.58869	-0.196094
1451335_at	4.53206e-20	14.364	14.4131	-0.0491764		1421648_at	2.23792e-16	7.11058	6.77744	0.333146		1425039_at	2.69887e-10	7.80859	7.94277	-0.134178
1434310_at	4.6719e-20	9.34932	6.08841	3.2609		1446478_at	2.24049e-16	6.3854	6.49963	-0.114236		1454990_at	2.70411e-10	8.30458	8.73214	-0.427565
1433968_a_at	4.83101e-20	6.9555	6.88781	0.0676922		1434881_s_at	2.26008e-16	7.18918	7.03372	0.155461		1426499_at	2.77031e-10	8.89673	8.83928	0.0574439
1428725_at	4.92731e-20	7.88945	8.07901	-0.189559		1434431_x_at	2.27968e-16	3.63494	3.6052	0.0297387		1418169_at	2.79884e-10	9.11369	9.00741	0.106282
1430311_at	4.93363e-20	6.79235	6.69302	0.0993285		1419561_at	2.31533e-16	7.55666	7.558	-0.00133797		1453732_at	2.80404e-10	5.51377	5.59326	-0.079497
1417122_at	5.05878e-20	9.37042	9.48253	-0.112111		1445135_at	2.37324e-16	5.82487	5.77257	0.0522997		1427258_at	2.80573e-10	6.35342	6.2795	0.0739178
1423345_at	5.05888e-20	6.25376	6.20156	0.0521983		1457720_at	2.37619e-16	5.57209	5.13394	0.438154		1426999_at	2.8149e-10	10.0274	10.1469	-0.119433
1422560_at	5.06697e-20	5.6049	6.03545	-0.430545		1422175_at	2.39255e-16	9.02889	9.15773	-0.12884		1420971_at	2.824e-10	4.04571	3.61907	0.426644
1433507_a_at	5.08405e-20	3.17295	3.17556	-0.00260468		1454508_at	2.45199e-16	11.4134	11.454	-0.0405981		1435787_at	2.85346e-10	4.99227	5.36543	-0.373165
1441482_at	5.10901e-20	3.43969	3.47912	-0.0394359		1421143_at	2.45376e-16	4.17941	4.26635	-0.0869425		1428086_at	2.96094e-10	6.0561	6.14968	-0.0935758
1423706_a_at	5.37306e-20	5.99456	6.15752	-0.162964		1423042_at	2.47851e-16	8.24523	8.0983	0.146931		1446509_at	2.97922e-10	5.20867	5.13924	0.0694295
1417297_at	5.42363e-20	11.8786	12.0388	-0.160209		1448758_at	2.47871e-16	2.93055	2.9296	0.000954087		1438566_at	2.99756e-10	6.21022	6.26689	-0.0566673
1448898_at	5.53284e-20	7.7684	8.14586	-0.377455		1429826_at	2.55137e-16	6.34944	5.91298	0.436457		1438063_at	3.0344e-10	6.76076	6.97196	-0.211199
1451941_a_at	5.86291e-20	4.57833	5.01799	-0.439655		1443107_at	2.675e-16	5.83499	6.09833	-0.263341		1420338_at	3.09528e-10	7.73922	8.25541	-0.516195
1436289_x_at	6.12133e-20	5.38306	5.43434	-0.0512825		1449324_at	2.68013e-16	4.82716	4.88526	-0.0580994		1428698_at	3.10767e-10	6.43972	6.60693	-0.167208
1426440_at	6.40625e-20	5.57398	5.4575	0.116472		1440960_at	2.69214e-16	7.01895	7.11158	-0.0926305		1452946_a_at	3.12473e-10	10.4184	10.2863	0.132081
1416701_at	6.43042e-20	7.58705	7.65209	-0.065041		1447936_at	2.69331e-16	5.53592	5.67629	-0.14037		1450885_at	3.12831e-10	7.75333	7.53289	0.220432
1417632_at	6.49877e-20	9.29692	9.62067	-0.323742		1448248_at	2.74129e-16	5.07127	4.87322	0.198054		1437254_at	3.15858e-10	6.15126	6.28808	-0.13682
1450672_a_at	6.61404e-20	8.5173	8.67255	-0.155254		1447869_x_at	2.75452e-16	2.62757	2.55865	0.0689138		1446553_at	3.18846e-10	6.01715	6.27423	-0.257074
1439468_at	6.63035e-20	2.84796	2.8651	-0.0171387		1450295_s_at	2.89512e-16	6.8801	7.15212	-0.27202		1442798_x_at	3.19089e-10	5.94151	6.65692	-0.715413
1435715_x_at	6.63111e-20	7.68909	7.52804	0.161051		1419068_at	2.90405e-16	13.7528	13.7751	-0.022308		1420970_at	3.19126e-10	12.9224	12.94	-0.0176554
1416010_a_at	6.85994e-20	9.2614	9.13101	0.13039		1448856_a_at	3.05227e-16	5.02173	4.93537	0.0863594		1419694_at	3.19914e-10	8.88304	8.05835	0.824693
1446737_a_at	6.91627e-20	4.93858	4.95882	-0.0202363		1424613_at	3.1622e-16	4.67118	4.79826	-0.127077		1428848_a_at	3.25044e-10	14.9	14.8933	0.00668059
1449829_at	6.97595e-20	6.43141	6.34279	0.0886182		1437591_a_at	3.20163e-16	10.6926	10.2548	0.437728		1424067_at	3.27532e-10	3.6115	3.63294	-0.0214359
1436778_at	6.98658e-20	7.25662	7.32585	-0.0692383		1448404_at	3.3305e-16	5.19844	5.09869	0.0997434		1448354_at	3.30294e-10	9.09859	9.1676	-0.0690132
1416983_s_at	7.25329e-20	6.41471	6.43292	-0.0182145		1423904_a_at	3.377e-16	5.89163	5.57806	0.313568		1428767_at	3.32571e-10	9.14262	9.27929	-0.13667
1448199_at	7.27632e-20	3.17427	3.20238	-0.0281016		1419679_at	3.42841e-16	11.1985	11.0828	0.115728		1433871_at	3.37538e-10	5.96085	6.03545	-0.0745953
1456453_at	7.36707e-20	4.71212	4.82024	-0.108123		1440589_at	3.44287e-16	3.55964	3.5212	0.0384335		1436858_at	3.40732e-10	6.57534	7.14132	-0.565975
1455300_at	7.48732e-20	3.7875	3.97193	-0.184422		1430558_at	3.46474e-16	2.42256	2.53979	-0.117232		1425650_at	3.42498e-10	7.02759	7.22976	-0.202165
1455530_at	8.5646e-20	5.69135	5.7879	-0.0965464		1433227_at	3.51561e-16	8.60283	8.69704	-0.0942021		1439348_at	3.54724e-10	4.94542	4.56903	0.376383
1433999_at	8.66163e-20	5.39861	5.41557	-0.0169594		1449840_at	3.57815e-16	3.81432	3.84456	-0.030243		1417456_at	3.5499e-10	7.95003	8.27183	-0.321796
1416981_at	9.05693e-20	13.6615	13.747	-0.0854635		1458120_at	3.5844e-16	6.6456	6.29253	0.35307		1450922_a_at	3.54991e-10	7.47282	7.57218	-0.0993604
1418762_at	9.14333e-20	7.33857	6.87716	0.461404		1421326_at	3.66316e-16	6.07688	5.79848	0.278401		1439322_at	3.58376e-10	5.76295	5.71253	0.0504232
1418842_at	9.54074e-20	13.7568	13.8041	-0.0472687		1436385_at	3.66393e-16	3.83664	3.87248	-0.0358381		1436534_at	3.6535e-10	6.83258	6.83323	-0.000650029
1420407_at	9.63436e-20	7.49608	7.53431	-0.0382253		1427418_a_at	3.6889e-16	11.488	10.9403	0.547664		1428878_a_at	3.65884e-10	6.08697	6.84956	-0.762594
1418402_at	9.71759e-20	9.25803	8.59652	0.661505		1419083_at	3.69502e-16	8.38214	8.17348	0.208665		1417527_at	3.71581e-10	9.06496	9.15117	-0.086207
1449554_at	1.01375e-19	6.22205	6.42372	-0.20167		1446241_at	3.80108e-16	3.21918	3.57144	-0.352263		1450874_at	3.73072e-10	10.0064	9.57904	0.427394
1416891_at	1.01446e-19	9.36532	9.49438	-0.12906		1453307_a_at	3.80243e-16	5.7185	6.382	-0.663499		1448576_at	3.73614e-10	10.0876	10.3279	-0.240337
1450882_s_at	1.01805e-19	3.4071	3.42589	-0.0187976		1448898_at	3.90217e-16	7.37887	7.4236	-0.0447223		1451713_a_at	3.75442e-10	6.88704	6.70021	0.186829
1421855_at	1.03054e-19	7.13364	7.85063	-0.71699		1447344_at	3.90961e-16	6.16234	6.22668	-0.0643414		1428517_at	3.78082e-10	7.31594	6.98656	0.329384
1454722_at	1.03086e-19	8.05444	8.32102	-0.266581		1432352_at	3.97318e-16	8.01516	5.76616	2.249		1433624_at	3.7819e-10	5.27843	5.35207	-0.0736466
1423521_at	1.04754e-19	10.3306	8.745	1.58564		1453090_x_at	3.98611e-16	5.95097	5.78717	0.163794		1428412_at	3.79028e-10	7.4553	7.29787	0.157436
1457035_at	1.08015e-19	4.02058	4.14796	-0.12738		1443292_at	4.05369e-16	3.10569	3.00453	0.101163		1450070_s_at	3.81182e-10	5.10002	5.32125	-0.221234
1429960_at	1.0968e-19	3.47485	3.48664	-0.0117903		1420557_at	4.05678e-16	4.58787	4.60848	-0.0206131		1434764_at	3.87342e-10	5.3147	5.40088	-0.0861881
1418575_at	1.10621e-19	8.81983	8.76977	0.0500688		1459580_at	4.18405e-16	6.24537	5.44519	0.800182		1437314_a_at	3.96346e-10	6.77372	6.44332	0.3304
1449581_at	1.11111e-19	4.96031	4.91116	0.0491519		1420099_at	4.19302e-16	7.35738	7.71144	-0.354052		1434384_at	4.02573e-10	5.66947	5.81287	-0.143394
1453365_at	1.17924e-19	4.78776	5.23605	-0.448293		1449399_a_at	4.26609e-16	6.28581	6.4646	-0.178787		1422938_at	4.0447e-10	8.63847	8.7176	-0.079127
1426842_at	1.18549e-19	5.58809	5.62757	-0.0394792		1449345_at	4.46658e-16	2.3537	2.45836	-0.104665		1460207_s_at	4.10875e-10	6.93477	7.08209	-0.147314
1425503_at	1.20198e-19	5.71899	5.45796	0.261027		1425494_s_at	4.52601e-16	3.58349	3.4898	0.0936878		1416197_at	4.11849e-10	3.37158	3.51822	-0.146638
1437506_at	1.21019e-19	5.23711	5.20272	0.0343936		1423519_at	4.73064e-16	4.58744	4.377	0.210437		1419537_at	4.12425e-10	7.08818	7.06129	0.0268934
1442988_at	1.22944e-19	4.53549	4.20326	0.332226		1422191_at	4.75238e-16	8.94233	8.89495	0.0473773		1449546_a_at	4.17865e-10	8.8572	9.187	-0.329807
1455081_at	1.2574e-19	8.58556	7.97615	0.609407		1420899_at	4.82044e-16	8.73675	8.34824	0.388516		1430597_at	4.19565e-10	8.45699	8.36083	0.0961617
1434378_a_at	1.25872e-19	4.94107	4.99146	-0.0503972		1439136_at	4.85413e-16	4.79476	4.56118	0.233576		1453721_a_at	4.36197e-10	6.91659	7.30137	-0.384777
1437760_at	1.3009e-19	8.01602	7.49399	0.522027		1417585_at	4.86894e-16	5.03341	4.34747	0.685944		1417086_at	4.40052e-10	9.69522	9.53539	0.159837
1448543_at	1.3055e-19	7.39027	8.68117	-1.2909		1434197_at	4.90116e-16	8.45388	8.45962	-0.00573265		1420979_at	4.42695e-10	10.8607	10.7559	0.104791
1429889_at	1.3332e-19	3.19393	3.16898	0.0249439		1433228_at	4.95604e-16	3.59217	3.63917	-0.0470042		1419443_at	4.43649e-10	12.8591	12.87	-0.0108536
1430769_s_at	1.34048e-19	8.45312	7.69955	0.753578		1439623_at	4.97034e-16	3.63374	3.69595	-0.0622103		1448192_s_at	4.51154e-10	6.73596	6.71002	0.0259355
1449310_at	1.35655e-19	10.1606	9.82446	0.336185		1417478_a_at	5.07039e-16	11.8399	11.8756	-0.0356766		1452835_a_at	4.5321e-10	9.10702	9.68178	-0.574752
1449711_at	1.39389e-19	3.58697	3.5003	0.0866724		1448348_at	5.08031e-16	6.44816	6.48959	-0.0414293		1443777_at	4.5459e-10	12.5279	12.2386	0.289262
1452789_at	1.50286e-19	3.76883	3.79776	-0.0289316		1447970_at	5.10493e-16	2.93259	3.00617	-0.0735774		1426449_a_at	4.56049e-10	9.60058	9.46376	0.136818
1449874_at	1.52723e-19	5.42198	6.46849	-1.0465		1439273_at	5.29314e-16	5.24021	4.33572	0.904486		1419972_at	4.59893e-10	5.75171	6.14208	-0.390371
1447789_x_at	1.52827e-19	6.21985	6.35778	-0.137931		1427632_x_at	5.41859e-16	10.8069	11.5348	-0.727867		1425208_at	4.66002e-10	6.58331	7.07447	-0.491157
1424013_at	1.57807e-19	5.22327	5.33718	-0.113913		1447211_at	5.44779e-16	3.6294	3.6865	-0.0570999		1444493_at	4.6797e-10	6.87583	6.6889	0.186929
1450318_a_at	1.58008e-19	6.79832	6.6367	0.161618		1424848_at	5.45469e-16	6.70647	6.46074	0.24573		1422573_at	4.69061e-10	8.10909	7.5186	0.590489
1416775_at	1.60134e-19	9.0692	9.00741	0.061795		1442292_at	5.48282e-16	4.60822	4.49982	0.108396		1455975_x_at	4.69378e-10	5.07927	5.22032	-0.141056
1419536_a_at	1.66439e-19	10.0321	10.0139	0.0182461		1446599_at	5.57656e-16	3.95543	3.94656	0.00886748		1433454_at	4.69607e-10	8.5245	8.78186	-0.257357
1423662_at	1.68559e-19	8.59313	8.8267	-0.233565		1442812_at	5.59533e-16	4.28683	4.35865	-0.0718188		1428176_at	4.71153e-10	9.15909	9.19643	-0.0373351
1451561_at	1.68935e-19	4.07338	4.09502	-0.0216383		1432537_at	5.74683e-16	4.77111	4.84792	-0.0768105		1460218_at	4.73488e-10	7.19092	6.74074	0.450185
1436333_a_at	1.7494e-19	4.10827	4.16862	-0.060357		1460614_at	5.80991e-16	3.19895	3.25524	-0.0562944		1450977_s_at	4.7932e-10	5.19277	5.15907	0.0337011
1448957_at	1.75284e-19	5.89254	5.57678	0.315761		1454896_at	5.8156e-16	3.35794	3.0997	0.258243		1433859_at	4.95052e-10	6.04977	6.09434	-0.0445749
1421210_at	1.82644e-19	8.1226	8.01763	0.104973		1456432_at	6.05249e-16	6.48434	6.40612	0.0782182		1430291_at	5.08352e-10	5.31496	5.80515	-0.490187
1423558_at	1.82893e-19	7.10025	7.14994	-0.0496828		1450274_at	6.08653e-16	7.61861	6.64594	0.972665		1427992_a_at	5.08542e-10	6.68004	6.62205	0.0579881
1422062_at	1.87795e-19	5.4902	5.49523	-0.00502683		1437271_at	6.1427e-16	4.06486	4.07373	-0.00887381		1449222_at	5.09215e-10	7.33757	7.97941	-0.641832
1429413_at	1.89461e-19	5.69304	5.89585	-0.202804		1448149_at	6.15703e-16	12.7316	13.1535	-0.421974		1421908_a_at	5.14086e-10	5.81994	5.98342	-0.163482
1424989_at	1.91624e-19	7.98279	8.15037	-0.167587		1421845_at	6.22552e-16	5.78813	5.74828	0.0398533		1454709_at	5.16332e-10	7.79441	7.84184	-0.0474225
1444100_at	1.93183e-19	4.03825	4.05401	-0.0157547		1417542_at	6.27911e-16	7.46482	6.789	0.675818		1416902_a_at	5.1706e-10	7.45254	7.57019	-0.117645
1444375_at	1.9421e-19	5.08705	5.07113	0.0159195		1421842_a_at	6.33046e-16	6.54921	6.55187	-0.00266261		1451745_a_at	5.25601e-10	6.46173	6.49721	-0.0354827
1448948_at	2.07068e-19	6.56887	6.5385	0.0303767		1425493_at	6.48205e-16	2.66918	2.58263	0.0865504		1445104_at	5.28496e-10	4.78694	4.74617	0.0407663
1417890_at	2.07797e-19	2.60201	2.61325	-0.0112387		1429759_at	6.52434e-16	6.05416	6.05216	0.00199339		1425311_at	5.29839e-10	7.493	7.775	-0.281998
1437025_at	2.15012e-19	5.96899	5.86345	0.105537		1424344_s_at	6.5793e-16	6.926	6.6294	0.296595		1427178_at	5.3025e-10	6.83703	6.80081	0.0362241
1448171_at	2.16098e-19	3.31709	3.32899	-0.0118988		1434339_at	6.6151e-16	9.6859	9.83701	-0.151103		1453307_a_at	5.31837e-10	5.33461	5.41235	-0.0777411
1448354_at	2.17369e-19	4.65702	4.62204	0.0349724		1425663_at	6.68057e-16	5.58057	5.43614	0.144428		1421312_a_at	5.35293e-10	8.19113	7.91884	0.272285
1422506_a_at	2.19948e-19	6.37963	6.40199	-0.0223674		1419069_at	6.69233e-16	9.68469	9.68563	-0.000935585		1449254_at	5.41553e-10	7.19031	7.3186	-0.128286
1416466_at	2.22734e-19	12.736	12.9819	-0.24588		1428219_at	6.75666e-16	5.50622	5.13502	0.371205		1419193_a_at	5.45613e-10	5.70263	5.878	-0.17537
1416467_at	2.25457e-19	8.01409	8.00937	0.00472612		1421637_at	6.77455e-16	5.96128	5.97384	-0.0125595		1428884_at	5.45683e-10	5.92327	6.14162	-0.218349
1420611_at	2.25605e-19	4.57672	4.05668	0.52004		1417509_at	6.84731e-16	9.01384	8.2429	0.770939		1431449_at	5.49797e-10	5.66628	5.76186	-0.0955807
1421211_a_at	2.27648e-19	11.6872	11.7552	-0.0680151		1455437_at	6.93242e-16	4.37357	4.2824	0.0911645		1428408_a_at	5.57146e-10	8.48928	8.52791	-0.0386296
1435996_at	2.36182e-19	10.5725	9.73099	0.841544		1459041_at	7.10483e-16	8.48593	8.07535	0.41058		1434478_at	5.58896e-10	10.3852	10.7323	-0.347128
1451458_at	2.37122e-19	6.97767	7.66297	-0.685299		1417508_at	7.18116e-16	7.74928	7.4082	0.341084		1454762_at	5.60591e-10	6.21084	5.88144	0.329404
1418322_at	2.38972e-19	7.4994	7.2371	0.262305		1454402_at	7.20744e-16	5.3716	5.47199	-0.100387		1452033_at	5.71455e-10	10.0855	9.90081	0.184735
1446396_at	2.42644e-19	7.12321	7.38283	-0.259616		1458554_at	7.637e-16	8.40962	8.62258	-0.212959		1422576_at	5.75077e-10	4.67759	5.04946	-0.371862
1423589_at	2.51878e-19	7.50585	7.48969	0.0161667		1433605_at	7.77161e-16	6.87853	6.89426	-0.0157264		1448160_at	5.75303e-10	5.77052	5.78763	-0.0171118
1456777_at	2.55237e-19	6.2653	6.42648	-0.161185		1441887_x_at	7.86827e-16	3.65636	3.5449	0.111456		1452652_at	5.76662e-10	6.87517	7.01855	-0.143388
1418612_at	2.65871e-19	4.44973	4.32019	0.129544		1448537_at	7.87603e-16	7.11977	7.33825	-0.218474		1433737_at	5.77981e-10	10.6938	10.3822	0.311587
1417527_at	2.72577e-19	7.60144	7.70912	-0.107683		1434648_a_at	7.87887e-16	4.97961	4.97285	0.00676281		1418465_at	5.9233e-10	10.5085	10.2393	0.269138
1416432_at	2.77732e-19	7.03714	7.05046	-0.0133137		1445051_at	7.87947e-16	3.40139	3.28321	0.118184		1433487_at	5.92793e-10	4.69486	4.58238	0.112477
1436771_x_at	2.78319e-19	6.75561	6.05097	0.704642		1423903_at	7.89575e-16	8.9819	9.21925	-0.237352		1426755_at	5.99151e-10	6.39609	6.44052	-0.0444234
1424294_at	2.7838e-19	10.6312	11.3041	-0.672923		1456290_x_at	8.0794e-16	7.04694	6.73158	0.315364		1440615_at	6.0387e-10	7.13925	7.18566	-0.0464096
1425486_s_at	2.89469e-19	4.49129	4.583	-0.0917092		1433724_at	8.10334e-16	5.54824	5.33975	0.208492		1438307_at	6.20599e-10	4.48881	4.67886	-0.190049
1454051_at	3.07635e-19	3.99932	3.9223	0.0770154		1446730_at	8.11576e-16	5.64574	5.62963	0.0161057		1417560_at	6.23457e-10	8.44414	8.61992	-0.175775
1436502_at	3.21232e-19	3.97778	3.78886	0.188916		1438971_x_at	8.26048e-16	5.7195	6.20931	-0.489812		1420873_at	6.2414e-10	8.85965	8.8298	0.0298509
1424032_at	3.2189e-19	6.82343	7.60534	-0.781905		1418823_at	8.37301e-16	7.2941	7.10751	0.186586		1440388_at	6.34566e-10	6.1624	6.25639	-0.0939905
1452907_at	3.23035e-19	3.52822	3.62558	-0.0973629		1453053_at	8.60745e-16	2.77963	2.74806	0.0315776		1425890_at	6.36147e-10	6.54578	6.5577	-0.0119182
1423346_at	3.23846e-19	6.66916	6.63728	0.0318732		1447553_x_at	8.70163e-16	5.31428	5.33437	-0.0200852		1419282_at	6.36903e-10	6.62569	6.67048	-0.0447873
1429466_s_at	3.3672e-19	6.43062	6.51081	-0.0801921		1444698_at	8.76877e-16	3.20544	3.21767	-0.0122286		1420980_at	6.4043e-10	11.0942	11.173	-0.0787708
1417266_at	3.42963e-19	3.47183	3.20606	0.26577		1423053_at	8.88921e-16	8.1281	7.99891	0.129191		1456731_x_at	6.41391e-10	4.52549	4.4756	0.0498879
1452024_a_at	3.43385e-19	5.52017	5.68483	-0.164662		1442514_a_at	8.93759e-16	4.63643	4.65546	-0.0190291		1460213_at	6.51433e-10	7.87711	7.81993	0.0571877
1416012_at	3.6381e-19	7.31019	7.37227	-0.0620751		1423031_at	9.06599e-16	7.11878	6.52346	0.595314		1436101_at	6.62879e-10	6.80669	6.57508	0.231608
1434331_at	3.67924e-19	5.51161	5.57415	-0.0625384		1439160_at	9.45314e-16	4.02058	4.23574	-0.215162		1452874_at	6.77598e-10	5.43405	4.9752	0.458857
1449336_a_at	3.70852e-19	4.06486	4.06513	-0.000272373		1443936_at	9.45879e-16	3.78436	4.00247	-0.218113		1443624_at	6.86688e-10	4.00262	3.84337	0.159252
1426565_at	3.71787e-19	11.027	10.3826	0.644411		1421324_a_at	9.57525e-16	5.25996	5.16623	0.0937331		1433779_at	6.87037e-10	8.12499	8.25089	-0.125899
1418797_at	3.72971e-19	8.11759	8.5166	-0.399006		1423599_a_at	9.59748e-16	8.80757	8.74924	0.0583278		1453095_at	6.95027e-10	7.57522	7.5838	-0.00858772
1437090_at	3.79139e-19	4.84229	4.87332	-0.0310312		1452279_at	9.68821e-16	6.23191	6.28963	-0.0577215		1438967_x_at	6.9833e-10	8.96123	9.12487	-0.163642
1428781_at	3.92452e-19	7.0835	7.24196	-0.15845		1457580_at	9.75657e-16	4.00562	3.98552	0.0201023		1418592_at	7.02003e-10	9.71313	8.45916	1.25397
1428637_at	4.23793e-19	6.06818	6.09365	-0.0254664		1440907_at	9.91907e-16	7.83272	7.73057	0.102145		1458858_at	7.20773e-10	4.08615	4.17219	-0.0860378
1433769_at	4.25207e-19	6.69825	6.71013	-0.0118831		1457638_x_at	1.01717e-15	7.48539	7.23009	0.255304		1427081_at	7.25819e-10	8.2813	8.38608	-0.10477
1434197_at	4.43504e-19	5.19833	5.19278	0.0055511		1428997_at	1.03886e-15	7.88	7.86242	0.0175777		1416800_at	7.35477e-10	7.00589	7.09379	-0.0879006
1420979_at	4.51853e-19	7.48248	7.3531	0.129375		1418703_at	1.04502e-15	8.72108	8.50633	0.214752		1419060_at	7.35562e-10	8.87728	9.02014	-0.14286
1423401_at	4.53601e-19	5.5014	5.52623	-0.0248376		1428789_at	1.05141e-15	5.74354	5.34841	0.395127		1422511_a_at	7.38766e-10	3.13701	3.22848	-0.0914785
1448583_at	4.72349e-19	5.21171	5.33565	-0.123939		1452065_at	1.05192e-15	5.69304	5.77766	-0.0846112		1430533_a_at	7.40706e-10	6.93802	7.42371	-0.485687
1451201_s_at	4.80021e-19	4.26203	4.16639	0.0956426		1453163_at	1.05343e-15	5.98423	5.68737	0.296863		1425591_a_at	7.43238e-10	5.45203	5.56215	-0.110115
1447813_x_at	4.8195e-19	9.76801	8.39906	1.36895		1425813_at	1.06126e-15	6.12994	5.98524	0.144706		1452573_a_at	7.52607e-10	8.05892	8.17479	-0.115865
1420023_at	5.23476e-19	8.05654	7.99515	0.061392		1445588_at	1.06378e-15	8.48964	8.01057	0.479067		1451125_at	7.53916e-10	7.32057	7.99658	-0.676013
1452408_at	5.28324e-19	4.22805	4.24681	-0.0187586		1446946_at	1.06488e-15	6.45522	6.24794	0.207273		1455009_at	7.5822e-10	6.22683	6.37089	-0.144066
1457270_at	5.58023e-19	5.80837	5.81762	-0.00925634		1457497_at	1.06518e-15	6.21066	6.0981	0.112556		1425296_a_at	7.69123e-10	5.25212	5.3078	-0.0556834
1448187_at	5.74002e-19	5.38225	5.44378	-0.0615296		1432302_s_at	1.08065e-15	10.9705	10.3715	0.598988		1448694_at	7.71595e-10	6.82439	7.05633	-0.231946
1454197_a_at	6.0316e-19	4.81681	4.71155	0.105259		1454513_at	1.08522e-15	8.2983	8.27801	0.020297		1416019_at	7.71959e-10	12.1976	12.3452	-0.14753
1434880_at	6.29278e-19	5.41762	5.53653	-0.118901		1451251_at	1.0927e-15	7.93611	7.68029	0.255821		1418806_at	7.73565e-10	8.60879	8.6717	-0.0629133
1438075_at	6.38274e-19	3.35372	3.35728	-0.00355794		1420380_at	1.12109e-15	8.06449	7.96955	0.094933		1436225_at	7.74196e-10	7.26315	7.41911	-0.155963
1460257_a_at	6.58518e-19	4.94732	4.97162	-0.0242956		1432870_at	1.12315e-15	5.60773	5.67944	-0.0717064		1435074_at	7.76526e-10	7.66883	7.60921	0.0596251
1422503_s_at	6.75246e-19	8.25945	8.35929	-0.0998388		1459310_at	1.13707e-15	9.89359	10.1308	-0.237196		1456247_x_at	7.78086e-10	7.88066	7.89625	-0.0155934
1452237_at	7.24606e-19	7.92026	7.03032	0.889938		1438628_x_at	1.14849e-15	6.28891	6.32939	-0.040479		1418097_a_at	7.78381e-10	5.7607	5.67316	0.0875433
1448123_s_at	7.54184e-19	4.29674	4.30486	-0.00811944		1445875_at	1.18066e-15	4.81099	4.96659	-0.155597		1423744_x_at	7.81495e-10	3.9129	4.04233	-0.129426
1425346_at	7.80589e-19	8.58105	6.81215	1.7689		1432571_at	1.18743e-15	7.41335	7.42073	-0.00737504		1429296_at	7.84128e-10	7.31201	7.432	-0.119985
1436398_at	8.02181e-19	4.00824	4.15191	-0.14367		1417744_a_at	1.1887e-15	10.9994	11.0942	-0.0947325		1420922_at	7.88519e-10	4.03226	4.06458	-0.0323231
1453009_at	8.07539e-19	3.38315	3.1188	0.26435		1429760_at	1.25612e-15	5.42415	5.45242	-0.028266		1423323_at	8.00446e-10	6.74904	7.01361	-0.264568
1448618_at	8.48591e-19	4.86405	5.41546	-0.551418		1458757_at	1.2954e-15	6.19229	5.93071	0.261576		1449212_at	8.01126e-10	9.43523	9.62135	-0.186115
1442003_at	8.72127e-19	5.99994	5.64561	0.354324		1443119_at	1.31827e-15	4.60049	4.63061	-0.0301248		1424444_a_at	8.02165e-10	6.90227	6.83472	0.0675482
1452534_a_at	8.87325e-19	6.20939	6.1812	0.0281893		1423346_at	1.32856e-15	7.23837	6.81789	0.420485		1445897_s_at	8.09412e-10	5.6757	5.78805	-0.112349
1425714_a_at	8.88227e-19	9.16035	9.27928	-0.11893		1445052_at	1.35472e-15	4.4858	4.3655	0.120302		1429466_s_at	8.19542e-10	6.14805	6.3997	-0.251652
1416471_at	9.09095e-19	8.94746	8.4099	0.53756		1445870_at	1.38627e-15	3.78497	3.5345	0.250471		1448571_a_at	8.22462e-10	7.6105	7.46019	0.150305
1447448_s_at	9.67846e-19	2.68734	2.61533	0.072005		1456583_x_at	1.38652e-15	3.48821	3.40682	0.0813907		1433575_at	8.23217e-10	6.13506	6.28987	-0.154809
1429782_at	9.76066e-19	3.58761	3.75607	-0.168463		1451852_at	1.38702e-15	6.0122	5.9184	0.0938043		1455460_at	8.30452e-10	6.46738	6.43929	0.028095
1460033_at	1.00516e-18	9.58568	9.2106	0.375089		1442793_s_at	1.38726e-15	7.80237	6.8944	0.907964		1439181_at	8.34967e-10	6.83732	6.54207	0.295249
1419297_at	1.0065e-18	5.51345	6.04384	-0.530386		1434272_at	1.39494e-15	9.4673	9.26746	0.199843		1420619_a_at	8.38957e-10	5.71899	6.36522	-0.646229
1418930_at	1.00872e-18	8.49631	7.60055	0.895764		1440778_x_at	1.41868e-15	6.68634	6.24681	0.439528		1449773_s_at	8.44584e-10	6.60035	6.66623	-0.0658755
1425706_a_at	1.04371e-18	4.47433	4.40424	0.0700872		1432076_at	1.44793e-15	4.38381	4.49881	-0.115001		1428536_at	8.65152e-10	6.38978	6.40037	-0.0105866
1422502_at	1.06518e-18	4.71982	4.72872	-0.00890446		1421376_at	1.46312e-15	4.66193	4.69486	-0.0329307		1454268_a_at	8.76987e-10	6.34376	7.42847	-1.08471
1435477_s_at	1.12065e-18	7.01139	7.05411	-0.0427248		1457336_at	1.50838e-15	4.32305	4.3504	-0.0273526		1436011_at	8.80021e-10	5.00455	5.31429	-0.309743
1418641_at	1.13192e-18	6.69554	6.44506	0.250481		1452169_a_at	1.51544e-15	3.19393	3.11397	0.0799591		1419646_a_at	8.83967e-10	5.93816	6.16061	-0.222452
1417932_at	1.1454e-18	5.32542	4.50524	0.820181		1433848_at	1.52207e-15	8.65587	8.73222	-0.0763468		1418016_at	8.95568e-10	10.4414	10.5875	-0.146057
1457955_at	1.19063e-18	3.63374	3.67116	-0.037417		1426645_at	1.52408e-15	8.92911	8.68798	0.241137		1451097_at	8.96375e-10	6.00825	6.20068	-0.192434
1451097_at	1.20186e-18	2.68148	2.79483	-0.113344		1455530_at	1.52681e-15	8.82275	7.88943	0.933329		1435388_at	8.97059e-10	7.67416	8.75933	-1.08517
1449078_at	1.23157e-18	9.70114	9.36649	0.334656		1448061_at	1.56843e-15	3.4071	3.34497	0.0621277		1429123_at	8.97401e-10	7.28254	7.29459	-0.0120498
1434836_at	1.31517e-18	6.38629	6.43211	-0.0458253		1423339_s_at	1.572e-15	6.35706	6.44755	-0.0904895		1433618_at	9.11093e-10	3.40542	3.37204	0.0333835
1448886_at	1.33205e-18	5.92033	5.9831	-0.0627694		1434079_s_at	1.59538e-15	4.32616	4.33221	-0.00604432		1451047_at	9.1257e-10	6.63786	6.91581	-0.277954
1430373_at	1.39958e-18	3.84959	3.93582	-0.0862398		1442913_at	1.62857e-15	5.18248	5.23553	-0.0530501		1446715_at	9.19287e-10	5.99451	6.42217	-0.427664
1450570_a_at	1.43147e-18	7.53974	7.78161	-0.241879		1423233_at	1.64048e-15	7.80863	7.59846	0.210174		1416176_at	9.38463e-10	11.9441	11.6418	0.302353
1434283_at	1.43811e-18	7.17619	6.97173	0.204454		1452002_at	1.65718e-15	5.5655	5.74056	-0.175063		1453000_at	9.53204e-10	6.81912	6.81045	0.00866598
1437763_at	1.4554e-18	5.11886	5.10478	0.0140779		1452457_a_at	1.70627e-15	6.31623	6.34325	-0.0270184		1450747_at	9.62148e-10	8.47413	8.43765	0.0364751
1455900_x_at	1.4558e-18	8.8917	9.17549	-0.283798		1438592_at	1.75008e-15	5.02782	4.62697	0.400857		1443414_at	9.64545e-10	6.56172	6.73441	-0.172695
1431843_a_at	1.4644e-18	5.82866	5.72664	0.102013		1439664_at	1.76501e-15	4.67808	4.89521	-0.217123		1437760_at	9.82799e-10	9.43482	9.45753	-0.0227074
1418980_a_at	1.51631e-18	12.0851	11.9721	0.112947		1424778_at	1.76915e-15	5.95588	5.5682	0.387686		1455020_at	9.86876e-10	6.03588	6.00273	0.0331487
1453568_at	1.52224e-18	4.81927	4.86141	-0.0421387		1445907_at	1.77809e-15	3.97327	3.90241	0.0708626		1427283_at	9.94985e-10	6.27618	6.37071	-0.0945291
1429775_a_at	1.53801e-18	4.17714	4.09406	0.0830859		1459044_at	1.78677e-15	6.65256	5.71996	0.932604		1417471_s_at	9.9679e-10	5.76092	5.87466	-0.113737
1425591_a_at	1.57383e-18	7.48524	7.3858	0.0994354		1419041_at	1.81506e-15	5.21281	5.2105	0.00231359		1417068_a_at	1.00339e-09	7.89752	7.95457	-0.0570485
1418555_x_at	1.57611e-18	5.60544	5.32251	0.282936		1431364_a_at	1.82196e-15	3.43063	3.41556	0.0150621		1425747_at	1.01725e-09	4.29578	4.64841	-0.352632
1456250_x_at	1.57865e-18	6.15939	6.12434	0.0350501		1420981_a_at	1.8446e-15	8.2742	8.26024	0.013964		1420905_at	1.0214e-09	6.11951	5.69344	0.426074
1436033_at	1.59444e-18	9.06971	9.09298	-0.0232703		1443564_at	1.84774e-15	3.16636	3.13358	0.0327799		1439291_at	1.04032e-09	5.82807	5.83973	-0.0116661
1439820_at	1.61275e-18	2.38054	2.38795	-0.00740645		1444402_at	1.87843e-15	5.44916	5.62863	-0.179476		1415973_at	1.04187e-09	11.0155	10.9115	0.103963
1433558_at	1.62771e-18	6.51674	6.65692	-0.14018		1448022_at	1.91638e-15	6.14884	6.1494	-0.00055347		1431252_a_at	1.04339e-09	6.7115	6.94217	-0.230674
1455132_at	1.63347e-18	7.851	7.63096	0.220039		1455699_at	1.93751e-15	3.13309	3.18215	-0.0490652		1421140_a_at	1.07063e-09	12.9052	13.277	-0.371764
1425347_a_at	1.65131e-18	9.33218	8.80008	0.532092		1446162_at	1.96792e-15	5.82273	5.8606	-0.0378676		1456064_at	1.07507e-09	6.17114	6.21351	-0.042373
1455432_at	1.66065e-18	5.53413	5.58241	-0.0482829		1420920_a_at	1.99629e-15	8.57723	8.29544	0.281782		1434774_at	1.08266e-09	9.16885	9.21635	-0.0475017
1456037_x_at	1.71646e-18	8.55189	7.48951	1.06238		1426841_at	2.01244e-15	7.33038	7.19778	0.132596		1428733_at	1.09621e-09	7.49492	7.72887	-0.233949
1442122_at	1.72238e-18	7.63821	7.67045	-0.0322423		1416743_at	2.02174e-15	8.3226	8.18842	0.13418		1455766_at	1.11091e-09	7.05318	7.12671	-0.0735302
1423135_at	1.7279e-18	5.25675	4.96555	0.291199		1460295_s_at	2.02476e-15	4.88611	5.04748	-0.161378		1453782_at	1.11396e-09	8.09255	8.40679	-0.314237
1428514_at	1.74772e-18	6.24448	6.41954	-0.175057		1456953_at	2.0344e-15	5.87973	5.72347	0.15626		1434379_at	1.13368e-09	9.87634	10.1291	-0.252723
1455332_x_at	1.76227e-18	5.92441	5.89868	0.0257299		1417272_at	2.0466e-15	6.18864	5.93816	0.250483		1453595_at	1.14842e-09	7.00269	7.05411	-0.0514199
1433557_at	1.7636e-18	7.31186	7.26934	0.0425291		1430353_at	2.06876e-15	4.6131	5.05977	-0.446673		1420611_at	1.15508e-09	6.79087	6.9452	-0.154334
1417696_at	1.78167e-18	6.77471	6.36522	0.409493		1425466_at	2.07388e-15	4.11865	4.18664	-0.0679959		1457153_at	1.16124e-09	5.57889	5.57631	0.00257984
1439256_x_at	1.85556e-18	5.01052	4.99023	0.0202868		1441283_at	2.08299e-15	5.23487	5.07775	0.157115		1424191_a_at	1.16299e-09	7.81021	7.84899	-0.0387817
1417661_at	1.86122e-18	8.115	8.39026	-0.275262		1442626_at	2.15795e-15	3.34637	3.42119	-0.0748201		1444985_at	1.16541e-09	9.85532	10.1114	-0.256041
1437181_at	1.89408e-18	5.61482	5.15745	0.457372		1450211_at	2.17013e-15	5.3364	5.40481	-0.0684099		1427030_at	1.17599e-09	9.2041	9.76162	-0.557521
1426315_a_at	1.93033e-18	5.42445	5.18503	0.239423		1441955_s_at	2.20675e-15	4.69053	4.72113	-0.0306072		1428750_at	1.2076e-09	9.3998	9.68567	-0.285871
1434980_at	2.00076e-18	5.39485	5.51521	-0.120359		1439886_at	2.20924e-15	6.60293	6.51181	0.091121		1425156_at	1.23293e-09	8.8191	8.00421	0.814885
1451108_at	2.02488e-18	6.82143	6.96271	-0.141278		1426469_a_at	2.25598e-15	5.14939	5.06727	0.0821191		1423652_at	1.23455e-09	9.73373	9.16738	0.566349
1418539_a_at	2.0665e-18	8.46809	8.34099	0.127101		1435109_at	2.31329e-15	6.92075	7.36808	-0.447332		1447612_x_at	1.2369e-09	8.31448	8.28804	0.0264415
1435260_at	2.07531e-18	4.25237	3.71228	0.540095		1450858_a_at	2.34168e-15	5.12843	4.81471	0.313718		1434547_at	1.2471e-09	8.81351	8.49637	0.317144
1424066_at	2.10616e-18	6.50087	6.45125	0.0496157		1443448_x_at	2.34467e-15	6.60583	6.55112	0.0547103		1438287_x_at	1.25129e-09	5.50504	5.4866	0.0184429
1439205_at	2.12637e-18	5.41169	5.44596	-0.0342662		1418433_at	2.3942e-15	5.31967	4.67759	0.642081		1427066_a_at	1.25174e-09	9.29076	8.5463	0.744465
1435464_at	2.13925e-18	6.24559	6.3673	-0.12171		1445753_at	2.41181e-15	5.2284	5.19605	0.0323465		1420703_at	1.26465e-09	9.2741	9.28609	-0.0119863
1436077_a_at	2.14058e-18	6.92481	7.0611	-0.136289		1421013_at	2.41618e-15	7.12012	7.13078	-0.010656		1449296_a_at	1.27927e-09	3.84127	3.88939	-0.0481176
1417936_at	2.16261e-18	6.7997	6.63765	0.162044		1432092_a_at	2.45017e-15	5.09016	5.12395	-0.0337843		1425193_at	1.31419e-09	2.94549	2.9104	0.0350909
1425784_a_at	2.17288e-18	6.34063	6.37089	-0.0302609		1441079_at	2.45312e-15	3.55228	3.26972	0.282559		1445895_at	1.32156e-09	9.7035	9.68588	0.0176158
1455502_at	2.32385e-18	9.28927	10.1393	-0.850047		1439971_at	2.55046e-15	2.49378	2.51046	-0.0166813		1417961_a_at	1.32211e-09	8.40602	8.38447	0.0215463
1448787_at	2.33462e-18	4.41354	4.67601	-0.262474		1418144_a_at	2.56122e-15	9.77772	7.88656	1.89115		1416897_at	1.32469e-09	8.1368	8.28547	-0.148672
1455860_at	2.35715e-18	6.19106	5.64173	0.549329		1430765_at	2.56424e-15	2.99465	3.02277	-0.0281198		1418801_at	1.3249e-09	7.76773	7.75904	0.00869315
1420024_s_at	2.36371e-18	6.26281	6.59302	-0.330202		1439993_at	2.58276e-15	4.341	5.05967	-0.718667		1425683_at	1.33737e-09	6.71752	6.79013	-0.0726066
1437539_at	2.52533e-18	4.69616	4.65631	0.0398503		1445314_at	2.61503e-15	5.64501	5.44412	0.200889		1460469_at	1.34423e-09	5.07776	5.08295	-0.00519133
1436008_at	2.56867e-18	5.54142	5.50991	0.0315161		1421487_a_at	2.62466e-15	6.43502	6.03871	0.396308		1436625_at	1.38062e-09	9.56375	9.2753	0.28845
1460034_at	2.5708e-18	5.49233	5.53756	-0.0452261		1417124_at	2.65219e-15	10.3441	10.0543	0.289833		1443703_at	1.40575e-09	9.36919	9.51996	-0.150773
1452443_s_at	2.57422e-18	4.7055	3.95651	0.748987		1439352_at	2.67242e-15	5.74983	5.62584	0.123989		1448143_at	1.4161e-09	5.61106	5.92423	-0.31317
1433939_at	2.59513e-18	7.41916	7.91348	-0.49432		1450049_a_at	2.72679e-15	2.98706	2.86336	0.123703		1449089_at	1.4246e-09	8.49666	8.31171	0.184941
1452316_at	2.65844e-18	4.91711	5.01476	-0.0976574		1449546_a_at	2.75129e-15	6.28801	5.85608	0.431923		1428096_at	1.43117e-09	6.51101	6.35997	0.15104
1415741_at	2.67504e-18	3.42687	3.41977	0.00710266		1458421_at	2.78344e-15	5.19123	5.18287	0.00835175		1428902_at	1.43516e-09	10.5887	10.539	0.0496914
1424711_at	2.6771e-18	2.88532	2.80527	0.0800555		1419208_at	2.8323e-15	10.8622	10.3049	0.557285		1431606_a_at	1.43564e-09	8.42183	8.4291	-0.00727115
1459916_at	2.76885e-18	6.99898	5.79516	1.20382		1440750_at	2.84545e-15	9.36746	9.85851	-0.491049		1446737_a_at	1.44851e-09	8.15247	8.26134	-0.108875
1450655_at	2.79215e-18	8.10705	8.03031	0.076744		1446169_at	2.86937e-15	9.65445	9.6874	-0.0329458		1428953_at	1.48569e-09	8.29461	8.1903	0.104308
1433508_at	2.81007e-18	6.09425	5.31204	0.782208		1451340_at	2.93495e-15	6.67048	6.42747	0.243014		1417846_at	1.49535e-09	5.69352	5.57502	0.1185
1436026_at	2.9545e-18	7.97708	7.50062	0.476454		1439740_s_at	2.95621e-15	3.50406	3.45762	0.0464405		1433805_at	1.51412e-09	7.26785	7.5533	-0.285442
1420273_x_at	2.98303e-18	7.16989	7.2545	-0.0846061		1439715_at	2.97254e-15	3.01263	3.01976	-0.00712833		1434549_at	1.5503e-09	7.9638	7.96453	-0.000731983
1415871_at	3.18808e-18	12.0944	11.4517	0.642704		1438796_at	2.98692e-15	6.02656	6.12077	-0.0942179		1416440_at	1.57581e-09	9.34398	9.1545	0.189483
1443703_at	3.24912e-18	7.1188	7.63146	-0.512663		1439181_at	3.03774e-15	5.34292	5.29481	0.0481115		1426891_at	1.59025e-09	3.96951	4.13221	-0.162699
1450784_at	3.25986e-18	3.89083	3.96696	-0.076126		1420764_at	3.04701e-15	4.70819	4.75192	-0.0437382		1427771_x_at	1.59286e-09	8.9298	9.19021	-0.260409
1419149_at	3.27173e-18	5.9598	6.08514	-0.125334		1434980_at	3.0706e-15	4.66887	4.88201	-0.213142		1418017_at	1.5949e-09	8.82233	8.99154	-0.169207
1460116_s_at	3.54417e-18	5.15248	5.04946	0.103024		1458949_at	3.08057e-15	7.52945	7.24455	0.284897		1444735_at	1.5951e-09	5.31936	5.65281	-0.333451
1416522_a_at	3.61513e-18	3.5344	3.57094	-0.0365329		1446255_at	3.08515e-15	5.06037	4.81449	0.245881		1425548_a_at	1.6093e-09	4.74892	5.17962	-0.430701
1460735_at	3.65424e-18	7.85532	8.33016	-0.474844		1428725_at	3.09393e-15	3.22355	3.30664	-0.0830888		1448618_at	1.63958e-09	6.49149	6.45658	0.0349138
1441230_at	3.66182e-18	6.04766	6.03707	0.0105861		1446573_at	3.10976e-15	4.49859	4.34193	0.156655		1454517_at	1.64035e-09	7.41291	7.54298	-0.130072
1419722_at	3.79538e-18	6.20984	6.07849	0.131344		1448892_at	3.16085e-15	7.73611	7.46342	0.272697		1427533_at	1.64216e-09	6.77304	6.67643	0.0966052
1415857_at	3.95725e-18	13.9475	13.686	0.261468		1442777_at	3.16664e-15	3.76997	3.92631	-0.156337		1430601_at	1.65118e-09	5.31066	5.36349	-0.0528231
1420250_at	4.00588e-18	6.6261	6.5577	0.0684062		1451717_s_at	3.20345e-15	5.00516	4.95872	0.0464403		1426666_a_at	1.66008e-09	7.51152	7.80149	-0.289974
1447209_at	4.0697e-18	7.05395	7.17893	-0.124976		1453373_at	3.34571e-15	3.96944	4.00578	-0.0363454		1423910_at	1.66493e-09	8.39923	8.41426	-0.015035
1436217_at	4.07739e-18	3.43372	3.56934	-0.135626		1433015_at	3.4202e-15	3.20147	3.40796	-0.206489		1453750_x_at	1.71624e-09	5.6545	5.69301	-0.0385181
1451777_at	4.11778e-18	6.1225	6.23219	-0.109696		1418025_at	3.48314e-15	7.5036	7.19667	0.306936		1433743_at	1.75701e-09	4.18664	4.39966	-0.213011
1434920_a_at	4.14872e-18	8.07486	8.23854	-0.163685		1441446_at	3.55014e-15	5.31724	5.34749	-0.0302552		1430373_at	1.78137e-09	6.37033	6.6265	-0.256175
1451716_at	4.30752e-18	5.72927	5.26845	0.460817		1417591_at	3.573e-15	9.74812	9.2741	0.474017		1455398_at	1.80171e-09	7.89207	8.31303	-0.420965
1449163_at	4.33269e-18	5.26066	5.31007	-0.0494074		1447818_x_at	3.57751e-15	8.1567	8.26102	-0.104318		1420804_s_at	1.80198e-09	7.1437	7.36624	-0.222541
1434648_a_at	4.44172e-18	4.74941	4.59372	0.155691		1436491_at	3.6335e-15	8.05158	6.87961	1.17198		1424754_at	1.80255e-09	9.99268	10.0139	-0.0211836
1423457_at	4.47406e-18	8.91869	9.25006	-0.33137		1444968_at	3.71276e-15	9.37542	9.03811	0.337304		1440806_x_at	1.80535e-09	4.08852	4.11922	-0.0307052
1425492_at	4.53265e-18	6.95135	7.14135	-0.19		1443803_x_at	3.71889e-15	4.89935	4.72418	0.175167		1444140_at	1.81207e-09	5.9298	5.99901	-0.0692089
1450654_a_at	4.53736e-18	7.13823	7.06145	0.0767757		1445342_at	3.73295e-15	5.15951	5.08864	0.0708754		1458668_at	1.81354e-09	5.8132	5.93771	-0.124503
1424254_at	4.57944e-18	4.37556	4.0728	0.302753		1436470_at	3.79893e-15	10.8485	10.7437	0.104838		1417535_at	1.82169e-09	13.2171	13.1919	0.0251859
1443263_at	4.63379e-18	10.2421	8.4672	1.77489		1420330_at	3.81094e-15	5.32429	5.35431	-0.0300232		1419764_at	1.83068e-09	8.77221	9.0341	-0.261887
1455170_at	4.75572e-18	8.62784	8.70545	-0.0776071		1428869_at	3.86118e-15	4.99225	4.91507	0.077179		1440351_at	1.83078e-09	3.08744	3.06857	0.0188647
1427656_at	4.86445e-18	8.59191	8.75463	-0.162726		1447663_at	3.86532e-15	5.81284	5.82349	-0.0106537		1420772_a_at	1.85507e-09	7.11453	7.08815	0.0263767
1455214_at	4.87457e-18	2.82188	2.72756	0.0943158		1424025_at	3.96872e-15	3.65008	3.69612	-0.0460387		1426226_at	1.87483e-09	3.96571	4.63218	-0.666466
1460407_at	5.05161e-18	3.64915	3.64384	0.00530716		1428938_at	3.96982e-15	7.41282	7.10465	0.308175		1418839_at	1.89007e-09	9.3733	9.48253	-0.109225
1428902_at	5.12858e-18	4.17357	4.19565	-0.0220801		1426020_at	3.99819e-15	6.33515	6.80669	-0.471541		1452457_a_at	1.90684e-09	10.2113	9.88997	0.321305
1447460_at	5.21713e-18	4.48085	4.48905	-0.00819597		1460487_at	4.03276e-15	7.25416	6.91278	0.341383		1420927_at	1.91796e-09	7.89553	8.09774	-0.202214
1419488_at	5.22927e-18	7.59995	7.35089	0.249056		1455975_x_at	4.09525e-15	4.71571	4.6908	0.024905		1434034_at	1.92736e-09	6.03871	6.07341	-0.0346975
1433943_at	5.31223e-18	3.62376	3.67969	-0.0559314		1454926_at	4.14569e-15	3.79396	3.94914	-0.155181		1450784_at	1.94515e-09	8.90917	8.68666	0.222512
1448600_s_at	5.35183e-18	8.66921	7.09698	1.57223		1441026_at	4.18303e-15	5.39402	5.22875	0.165274		1452016_at	1.9471e-09	3.85242	3.8739	-0.0214831
1448689_at	5.43655e-18	4.61539	4.69409	-0.0786972		1432650_at	4.18324e-15	3.04614	2.99682	0.0493205		1457645_at	2.04753e-09	4.7587	4.65961	0.0990957
1435040_at	5.43711e-18	8.00165	7.91295	0.0886978		1416154_at	4.23552e-15	7.98276	7.70356	0.279193		1459666_at	2.0526e-09	5.7972	5.79522	0.00198119
1434715_at	5.4537e-18	8.06746	6.54855	1.51891		1415826_at	4.33331e-15	5.85354	5.90926	-0.0557208		1450268_at	2.06046e-09	5.01657	4.98322	0.0333485
1417597_at	5.5505e-18	2.81682	2.78781	0.0290048		1448572_at	4.40077e-15	4.79549	4.98745	-0.191964		1453094_at	2.06976e-09	10.0248	9.97807	0.0467049
1415892_at	5.58871e-18	3.43342	3.51822	-0.0847949		1437218_at	4.40129e-15	13.87	13.9622	-0.0921426		1428411_at	2.08077e-09	5.5682	5.87643	-0.308233
1438233_at	5.72588e-18	7.95314	7.93259	0.0205529		1418946_at	4.40439e-15	8.64669	8.21611	0.430577		1438140_a_at	2.0829e-09	5.73462	5.62626	0.108356
1422041_at	5.72809e-18	3.98718	3.99014	-0.00296224		1418841_s_at	4.41059e-15	10.9476	10.7943	0.153296		1417142_at	2.11137e-09	8.44888	8.46752	-0.0186437
1438021_at	5.75372e-18	5.22548	5.06484	0.160644		1437181_at	4.5236e-15	6.87265	7.05133	-0.178687		1433851_at	2.13016e-09	10.1779	9.86334	0.314577
1422887_a_at	5.80472e-18	7.08369	7.35976	-0.276065		1458478_at	4.55492e-15	2.79798	2.80052	-0.00253796		1417522_at	2.13151e-09	4.04418	4.0869	-0.04272
1426722_at	5.81064e-18	8.01233	7.14612	0.866209		1441726_at	4.59293e-15	3.89706	3.97797	-0.0809077		1447211_at	2.13455e-09	6.61519	6.6495	-0.0343119
1444376_at	5.92191e-18	8.71438	8.78627	-0.0718901		1417986_at	4.70013e-15	8.99279	8.54704	0.445749		1449008_at	2.14609e-09	7.54216	7.35405	0.188106
1416472_at	5.93778e-18	6.17676	5.87466	0.3021		1442605_at	4.71097e-15	4.8531	4.78131	0.0717816		1439870_at	2.15705e-09	8.46053	8.31539	0.145136
1422703_at	6.20713e-18	8.03809	8.34092	-0.302824		1446821_at	4.95671e-15	5.54139	5.49983	0.0415599		1451560_at	2.16626e-09	7.79694	7.80366	-0.0067196
1424976_at	6.26029e-18	6.43357	6.41941	0.0141642		1442677_at	4.9595e-15	5.7775	5.73247	0.0450266		1423250_a_at	2.17974e-09	7.90892	8.15551	-0.246591
1423989_at	6.30147e-18	11.1066	11.2121	-0.105523		1438540_at	4.97569e-15	5.18505	5.48734	-0.302291		1435169_at	2.20801e-09	7.61768	7.91036	-0.292676
1448297_a_at	6.31238e-18	6.35732	6.28569	0.0716251		1455946_x_at	5.01555e-15	8.0316	8.23007	-0.198467		1431827_a_at	2.22137e-09	5.02295	4.99618	0.0267648
1443021_at	6.55125e-18	5.14636	5.36224	-0.215878		1453796_a_at	5.02521e-15	4.71621	4.70342	0.0127929		1457691_at	2.22463e-09	11.5715	11.9314	-0.359895
1439395_at	6.6292e-18	3.38057	3.4582	-0.077629		1423520_at	5.05529e-15	7.05714	6.39774	0.659402		1417741_at	2.23506e-09	13.1394	13.297	-0.157589
1425391_a_at	6.66698e-18	4.14077	4.09892	0.0418466		1448503_at	5.06274e-15	9.81243	9.09846	0.713975		1434348_at	2.24101e-09	7.97376	8.2879	-0.314144
1418578_at	6.75816e-18	3.99149	4.02625	-0.0347652		1436147_at	5.08917e-15	7.20717	7.59411	-0.386937		1435394_s_at	2.24255e-09	7.88923	7.80119	0.088049
1438031_at	6.78524e-18	5.25532	5.16439	0.0909359		1433699_at	5.12125e-15	8.71438	8.59941	0.114968		1449659_s_at	2.29177e-09	2.7134	2.80416	-0.090754
1438687_at	6.80482e-18	3.2009	3.27609	-0.0751919		1421478_a_at	5.13799e-15	10.1363	10.1591	-0.0227798		1451021_a_at	2.30002e-09	6.34104	6.38052	-0.0394853
1455291_s_at	7.04138e-18	11.0729	8.73007	2.34285		1451079_at	5.14212e-15	8.35275	8.68017	-0.327428		1449874_at	2.30416e-09	6.53458	6.45125	0.0833308
1418353_at	7.15989e-18	5.58931	5.68825	-0.0989402		1437223_s_at	5.19482e-15	10.1606	9.8781	0.282545		1426529_a_at	2.30587e-09	2.62814	2.62553	0.00260954
1456586_x_at	7.2419e-18	6.79437	6.39647	0.397898		1426721_s_at	5.19671e-15	7.13727	7.13925	-0.00197854		1458718_at	2.37125e-09	7.59996	7.31119	0.288764
1450669_at	7.46466e-18	6.52463	6.666	-0.141364		1436087_at	5.20611e-15	5.21955	5.10742	0.112136		1451728_at	2.38134e-09	5.2436	6.43925	-1.19565
1448110_at	7.78033e-18	8.24727	7.66451	0.58276		1445296_at	5.24316e-15	7.97146	8.1271	-0.155638		1426278_at	2.3945e-09	7.60332	7.58309	0.0202261
1436819_at	7.82469e-18	9.27764	9.28046	-0.00282225		1423441_at	5.28039e-15	7.21709	7.16445	0.0526394		1428781_at	2.4107e-09	7.13078	7.27134	-0.140555
1457376_at	8.08771e-18	5.05426	4.56256	0.491703		1429050_at	5.40014e-15	6.48181	6.59099	-0.109175		1423872_a_at	2.42214e-09	7.76498	7.28955	0.475429
1418574_a_at	8.16237e-18	5.31967	5.04946	0.270219		1426594_at	5.46738e-15	9.00111	8.35823	0.64288		1418980_a_at	2.44074e-09	10.093	10.1177	-0.0247045
1437913_at	8.28801e-18	8.96031	8.28638	0.673938		1433927_at	5.55527e-15	5.5154	5.49763	0.0177769		1425190_a_at	2.4455e-09	6.72358	6.38663	0.336953
1443414_at	8.40344e-18	8.35987	8.45968	-0.0998108		1454880_s_at	5.57835e-15	4.63528	4.60586	0.0294263		1454980_at	2.50116e-09	2.64809	2.6905	-0.0424168
1424455_at	8.56654e-18	6.69949	6.76445	-0.0649583		1439640_at	5.59397e-15	7.26506	7.11435	0.150702		1448620_at	2.52873e-09	8.10258	8.14631	-0.0437282
1433542_at	8.60367e-18	7.18667	7.09502	0.0916536		1451021_a_at	5.60265e-15	4.90196	4.87028	0.031684		1416085_s_at	2.55066e-09	8.8026	9.41022	-0.607614
1434379_at	8.7641e-18	3.03755	3.07276	-0.0352071		1427148_at	5.66347e-15	7.02478	6.89029	0.134493		1421129_a_at	2.58149e-09	8.14431	8.30183	-0.157521
1457174_at	8.87469e-18	7.42055	7.70927	-0.288717		1456307_s_at	5.66999e-15	10.1585	7.56927	2.58926		1415936_at	2.59087e-09	8.85574	8.70613	0.149606
1458668_at	9.02218e-18	5.52846	5.52229	0.00616682		1429110_a_at	5.67729e-15	6.68386	6.5173	0.166559		1419561_at	2.62402e-09	2.85846	2.93286	-0.0744051
1426550_at	9.33858e-18	8.85318	9.27929	-0.426112		1434174_at	5.71298e-15	5.17056	5.12051	0.0500596		1437356_at	2.62557e-09	4.29395	4.22521	0.0687397
1452821_at	9.40873e-18	5.70456	5.69784	0.00672775		1424053_a_at	5.71965e-15	9.34944	9.12562	0.223817		1448525_a_at	2.64894e-09	10.393	10.0829	0.310045
1430700_a_at	9.85708e-18	3.96892	4.06169	-0.0927715		1424225_at	5.7671e-15	7.99832	4.71862	3.2797		1419412_at	2.69109e-09	8.372	8.4009	-0.0289027
1437463_x_at	1.0334e-17	6.03527	5.70717	0.328099		1426289_at	5.99239e-15	7.72855	7.9234	-0.194852		1428132_at	2.70041e-09	6.88032	6.84828	0.0320362
1425380_at	1.07499e-17	4.2325	3.96162	0.270883		1423411_at	6.00043e-15	8.81641	8.76304	0.0533723		1419752_at	2.71911e-09	12.7014	12.6883	0.0131676
1425255_s_at	1.17217e-17	6.94502	6.9293	0.0157264		1455860_at	6.06049e-15	4.23854	4.26944	-0.0309029		1420874_at	2.74331e-09	6.83941	6.93674	-0.0973311
1448604_at	1.18025e-17	11.4201	10.9547	0.465462		1424997_at	6.09587e-15	6.44581	6.63575	-0.189944		1436918_at	2.75173e-09	6.09882	6.02373	0.0750874
1426725_s_at	1.19378e-17	6.95862	6.90443	0.0541869		1421530_a_at	6.11449e-15	6.9434	7.14997	-0.206576		1422865_at	2.7953e-09	6.32996	6.44506	-0.115097
1440084_at	1.2155e-17	7.63477	7.49406	0.140703		1419691_at	6.19898e-15	4.80413	4.71356	0.0905695		1428311_at	2.79788e-09	6.99166	6.76791	0.223745
1460338_a_at	1.22761e-17	3.38318	3.44966	-0.0664793		1418722_at	6.21436e-15	8.09742	8.00677	0.0906529		1438623_x_at	2.88543e-09	2.97719	2.92532	0.0518667
1443624_at	1.26661e-17	9.24724	9.49575	-0.248501		1457270_at	6.32664e-15	9.70924	10.2461	-0.536876		1426359_at	2.89426e-09	5.3803	5.32158	0.0587257
1460268_at	1.2882e-17	5.64115	5.25885	0.382307		1439733_at	6.36998e-15	5.46222	5.43421	0.0280139		1426309_at	2.92109e-09	7.95762	8.28008	-0.322467
1436608_at	1.28972e-17	10.5369	11.055	-0.518094		1447466_at	6.38643e-15	7.36147	7.41432	-0.0528408		1423160_at	2.92311e-09	9.45397	9.9159	-0.461925
1453596_at	1.31187e-17	6.85666	6.41871	0.437954		1426343_at	6.41587e-15	9.40205	9.43482	-0.0327723		1420671_x_at	2.9428e-09	9.31207	9.39557	-0.0834943
1434705_at	1.32441e-17	5.05639	5.05499	0.00140285		1455089_at	6.43024e-15	6.87388	6.83246	0.0414198		1416330_at	2.9831e-09	10.3217	10.6071	-0.285361
1419180_at	1.33034e-17	8.38214	8.20577	0.176371		1459359_at	6.43381e-15	8.09103	8.10124	-0.0102053		1453988_a_at	2.98925e-09	9.12562	9.13193	-0.00630867
1422820_at	1.35335e-17	5.51482	5.35344	0.161373		1425598_a_at	6.51572e-15	7.38736	7.50052	-0.113156		1416372_at	3.04925e-09	10.8206	10.9501	-0.129496
1460197_a_at	1.43484e-17	4.41186	4.53034	-0.118481		1422496_at	6.52705e-15	3.77139	3.76151	0.00987854		1455945_at	3.05702e-09	5.62754	5.39416	0.233375
1440587_at	1.45668e-17	3.91275	4.02118	-0.108434		1436118_at	6.58022e-15	4.86327	4.89745	-0.0341842		1435292_at	3.05892e-09	8.93656	9.36421	-0.427652
1433815_at	1.48546e-17	3.52248	3.54503	-0.0225507		1416102_at	6.58342e-15	9.11109	8.98784	0.123258		1421782_a_at	3.09705e-09	7.19667	7.32011	-0.123448
1451436_at	1.55104e-17	5.84534	5.98825	-0.142906		1422518_at	6.65889e-15	7.10025	7.12864	-0.0283813		1436306_at	3.10219e-09	4.74989	4.85522	-0.105323
1441657_at	1.59215e-17	4.68115	4.00422	0.676933		1442916_at	6.67099e-15	3.01366	3.08942	-0.0757599		1426314_at	3.13781e-09	13.1749	13.1971	-0.0222455
1446929_at	1.63453e-17	6.81337	6.89667	-0.0832942		1417409_at	6.70424e-15	10.5621	10.1718	0.390374		1439797_at	3.18527e-09	13.7362	13.8415	-0.105357
1437561_at	1.63751e-17	4.36083	4.45594	-0.0951125		1421023_at	6.71364e-15	4.35631	3.87607	0.480238		1458419_at	3.1864e-09	8.27626	8.17661	0.0996417
1425485_at	1.6615e-17	8.09369	7.95997	0.133723		1446282_at	6.75572e-15	8.52551	7.73191	0.793602		1452907_at	3.18777e-09	4.71081	4.583	0.127816
1426370_at	1.78377e-17	5.16419	5.23266	-0.068473		1453260_a_at	6.85871e-15	3.58265	3.6371	-0.0544515		1425625_at	3.25686e-09	7.95732	7.76529	0.192027
1420372_at	1.79603e-17	6.17019	6.35291	-0.182721		1417392_a_at	7.08805e-15	8.5299	8.12984	0.400061		1431337_a_at	3.26209e-09	8.6772	8.36858	0.308626
1420495_a_at	1.88324e-17	7.05799	6.95072	0.107271		1430455_at	7.19331e-15	8.41567	8.16494	0.250725		1426495_at	3.26804e-09	8.08115	8.09275	-0.0116046
1431055_a_at	1.93682e-17	7.15137	6.38051	0.770858		1439309_at	7.26687e-15	8.21583	8.39354	-0.177712		1452688_at	3.31401e-09	8.43154	8.45248	-0.0209416
1452966_at	1.97429e-17	5.44326	5.45513	-0.0118693		1424831_at	7.26821e-15	6.33899	6.38978	-0.0507942		1417149_at	3.35296e-09	8.10491	8.09948	0.00542666
1418398_a_at	2.00497e-17	5.48808	5.26601	0.222072		1442501_at	7.32464e-15	3.33431	3.41557	-0.0812566		1424356_a_at	3.35386e-09	11.6796	12.0409	-0.361284
1456055_x_at	2.0194e-17	4.98026	5.05537	-0.0751049		1422861_s_at	7.34026e-15	6.82942	6.72992	0.0994997		1431167_at	3.38431e-09	9.88706	9.75791	0.129154
1451024_at	2.02051e-17	7.41264	7.78183	-0.369189		1421249_at	7.34496e-15	6.41026	6.12888	0.281373		1438876_at	3.39453e-09	5.67519	5.64841	0.0267854
1416996_at	2.05419e-17	9.60956	8.45916	1.1504		1431091_at	7.40263e-15	3.55878	3.55168	0.00709287		1437763_at	3.43554e-09	5.96334	5.97105	-0.00771223
1429088_at	2.08119e-17	5.04355	5.09867	-0.0551212		1444705_at	7.59807e-15	3.67219	3.70656	-0.0343721		1429623_at	3.44552e-09	5.34944	5.37631	-0.0268713
1417971_at	2.13234e-17	5.70749	5.71229	-0.00479782		1430449_at	7.75544e-15	4.63155	4.35613	0.275428		1448184_at	3.48545e-09	5.38416	5.44601	-0.0618461
1455089_at	2.15557e-17	7.21891	5.29958	1.91933		1428778_at	7.84067e-15	7.46033	7.53412	-0.0737825		1451324_s_at	3.49999e-09	5.43726	5.55655	-0.119292
1456200_at	2.18094e-17	6.23233	5.97819	0.254144		1423854_a_at	7.84802e-15	7.26403	6.87517	0.38886		1448800_at	3.54182e-09	9.71893	9.86148	-0.142548
1429387_at	2.22179e-17	6.25986	5.85287	0.406989		1424462_at	7.98551e-15	7.60728	7.75815	-0.150867		1448361_at	3.55338e-09	3.0827	3.11123	-0.0285302
1422519_at	2.22862e-17	7.08657	7.5533	-0.466727		1426279_at	8.11601e-15	4.49274	4.09938	0.393357		1460616_at	3.55762e-09	3.33082	3.65569	-0.324864
1436589_x_at	2.23181e-17	8.74116	9.07735	-0.336194		1421782_a_at	8.35935e-15	7.73042	7.88923	-0.158815		1450945_at	3.55981e-09	7.35324	7.77712	-0.423873
1416502_a_at	2.25892e-17	6.71018	6.5193	0.190883		1415997_at	8.37369e-15	8.70989	8.29944	0.410454		1425610_s_at	3.58673e-09	4.71356	4.83585	-0.122281
1426170_a_at	2.28331e-17	8.40454	8.58135	-0.176807		1432655_at	8.44034e-15	6.44312	5.91936	0.523762		1425888_at	3.60272e-09	6.4449	6.34316	0.101737
1439255_s_at	2.3329e-17	2.701	2.77531	-0.0743101		1441416_at	8.44598e-15	4.16078	4.31341	-0.15262		1430005_a_at	3.64427e-09	5.43309	5.49523	-0.0621417
1421872_at	2.41111e-17	5.22954	5.14233	0.087206		1431453_at	8.51392e-15	5.67186	5.75794	-0.0860792		1452700_s_at	3.64604e-09	6.71042	6.62597	0.0844523
1434261_at	2.4553e-17	9.27856	6.55168	2.72688		1420997_a_at	8.58535e-15	7.37023	7.45061	-0.0803823		1417519_at	3.67394e-09	6.35086	6.5193	-0.168441
1418406_at	2.57617e-17	13.8671	13.8925	-0.025362		1456989_at	8.61244e-15	4.67698	4.70374	-0.0267586		1422703_at	3.67489e-09	3.96893	4.02625	-0.0573286
1416908_s_at	2.59435e-17	9.49365	9.25937	0.23428		1429555_at	8.71031e-15	12.0208	12.3188	-0.297991		1422572_at	3.70375e-09	5.21275	5.32251	-0.109756
1424373_at	2.59736e-17	3.0134	3.11211	-0.098712		1447944_at	8.71569e-15	4.40868	4.32339	0.0852836		1453807_at	3.72212e-09	3.5228	3.61621	-0.0934099
1442798_x_at	2.60269e-17	4.14715	4.03401	0.113131		1460700_at	8.83396e-15	4.02277	4.04311	-0.0203426		1426964_at	3.76163e-09	12.6973	12.7211	-0.0238342
1425396_a_at	2.61536e-17	8.10306	8.35757	-0.254517		1417023_a_at	9.00863e-15	6.14905	6.24939	-0.100338		1453007_at	3.81223e-09	7.48741	7.66647	-0.17906
1451416_a_at	2.62091e-17	4.64098	4.71643	-0.0754481		1442004_at	9.15482e-15	2.77339	2.80248	-0.0290911		1431225_at	3.8461e-09	3.28807	3.22347	0.0645969
1427666_a_at	2.66229e-17	9.09573	9.36421	-0.268477		1427736_a_at	9.28099e-15	7.74446	7.65081	0.0936488		1453586_at	3.87801e-09	5.80907	5.85968	-0.0506098
1428851_at	2.67232e-17	3.07558	3.10291	-0.0273261		1432803_at	9.3056e-15	4.31117	4.38637	-0.0751961		1421262_at	3.8792e-09	4.17923	4.2582	-0.0789789
1457917_at	2.90913e-17	5.176	5.36848	-0.192474		1421811_at	9.32288e-15	8.98867	9.06683	-0.0781548		1440651_at	3.94713e-09	3.56085	3.73236	-0.17151
1434339_at	2.92843e-17	6.43236	6.33489	0.0974687		1455953_x_at	9.42218e-15	6.48524	6.73361	-0.248366		1435835_at	3.97726e-09	5.40957	5.32398	0.085588
1448377_at	2.95256e-17	7.94267	7.84499	0.097675		1449250_at	9.54996e-15	6.70908	6.8318	-0.122721		1427074_at	3.98214e-09	7.58787	7.96676	-0.378887
1429114_at	2.96832e-17	7.81299	8.11999	-0.306996		1446857_at	9.67836e-15	5.47702	5.4542	0.0228193		1456765_at	4.00562e-09	2.88304	2.81486	0.0681754
1442042_at	3.07661e-17	8.01516	5.18484	2.83032		1459958_at	9.69763e-15	12.3767	12.6566	-0.279944		1437067_at	4.01232e-09	5.65992	6.12579	-0.465871
1418073_at	3.14639e-17	7.28375	7.04664	0.237108		1421473_at	9.71062e-15	6.4491	5.56536	0.88374		1425780_a_at	4.01425e-09	6.08407	6.21883	-0.134764
1436999_at	3.1661e-17	5.66918	5.2796	0.389578		1432384_a_at	9.76172e-15	4.36475	4.46789	-0.103137		1423041_a_at	4.02143e-09	8.64249	8.72081	-0.0783225
1452163_at	3.1683e-17	10.7253	10.8649	-0.139621		1438057_at	9.91964e-15	4.70986	4.61059	0.0992699		1423094_at	4.05074e-09	7.11328	7.32712	-0.213835
1451979_at	3.19705e-17	7.62987	7.71936	-0.0894882		1440625_at	9.92959e-15	3.42405	3.79361	-0.369565		1453421_at	4.11502e-09	4.52428	4.65455	-0.130272
1428487_s_at	3.21728e-17	6.94561	6.9927	-0.0470908		1418017_at	1.00403e-14	7.66528	7.04676	0.618514		1424567_at	4.11925e-09	6.52447	6.64317	-0.118696
1436074_at	3.28538e-17	5.21921	5.30547	-0.0862569		1422452_at	1.01564e-14	5.5014	5.57083	-0.0694304		1423371_at	4.11973e-09	13.067	13.1017	-0.0347027
1415830_at	3.32073e-17	9.10165	9.46209	-0.360434		1428807_at	1.02159e-14	6.57258	6.05851	0.51407		1433778_at	4.15807e-09	7.78924	7.8102	-0.0209617
1440885_at	3.37875e-17	3.03049	3.02431	0.00617308		1424013_at	1.03192e-14	5.48359	5.98861	-0.505024		1440344_at	4.17987e-09	8.36138	8.33527	0.0261163
1419971_s_at	3.4927e-17	6.04595	6.32876	-0.28281		1452218_at	1.04333e-14	7.25702	6.84451	0.412511		1424638_at	4.20218e-09	8.64175	8.5823	0.0594497
1428016_a_at	3.7564e-17	5.05561	5.32582	-0.270209		1422877_at	1.04926e-14	2.59727	2.49828	0.0989902		1422502_at	4.21358e-09	5.3634	5.09945	0.263952
1422507_at	3.76561e-17	6.09416	6.28987	-0.195712		1433442_at	1.04966e-14	7.53675	9.09582	-1.55907		1449514_at	4.24025e-09	8.11045	8.55133	-0.440876
1424141_at	3.88431e-17	8.35175	8.31683	0.03492		1450031_at	1.06235e-14	4.64893	4.74131	-0.0923762		1436289_x_at	4.24327e-09	7.24414	7.37265	-0.128509
1434333_a_at	4.02852e-17	5.77168	5.03672	0.734962		1417183_at	1.06328e-14	7.08309	6.62569	0.457395		1421969_a_at	4.24572e-09	7.29775	7.60899	-0.311235
1421266_s_at	4.04723e-17	7.03531	6.90971	0.125599		1434081_at	1.06451e-14	4.6075	4.4228	0.184708		1452789_at	4.25844e-09	4.60774	4.50809	0.0996493
1450424_a_at	4.10094e-17	7.31769	7.02846	0.289228		1423109_s_at	1.06566e-14	4.03531	3.83794	0.19737		1451340_at	4.2791e-09	5.21246	5.31338	-0.10092
1460242_at	4.16714e-17	3.98435	4.00662	-0.0222707		1457250_x_at	1.08043e-14	6.34574	6.4526	-0.106866		1418451_at	4.28223e-09	2.9628	3.04691	-0.0841133
1421473_at	4.21478e-17	9.08301	9.19021	-0.107192		1429693_at	1.08346e-14	3.2009	3.43026	-0.229367		1436423_at	4.28512e-09	6.59388	6.77155	-0.177672
1446553_at	4.30731e-17	6.12287	6.11647	0.00640604		1416075_at	1.08811e-14	10.1751	9.75648	0.41866		1454798_at	4.35645e-09	3.26203	3.03	0.232024
1445895_at	4.32517e-17	9.41914	9.63498	-0.215834		1456772_at	1.09579e-14	4.79655	4.67194	0.124607		1426685_a_at	4.42818e-09	7.96955	7.88909	0.0804594
1422191_at	4.34068e-17	8.22228	7.15392	1.06837		1451037_at	1.10675e-14	4.41868	4.41867	1.45456e-05		1458788_at	4.44011e-09	5.74114	5.81819	-0.0770546
1418993_s_at	4.36083e-17	7.50417	7.6186	-0.114436		1420839_at	1.11539e-14	6.74936	6.90276	-0.153396		1427764_a_at	4.4499e-09	8.38478	6.97359	1.41118
1431789_s_at	4.37592e-17	5.47197	5.5978	-0.12583		1450091_at	1.12015e-14	4.88019	4.77878	0.101407		1417593_at	4.46697e-09	8.57675	8.61985	-0.0430999
1452504_s_at	4.4071e-17	3.19493	3.19145	0.00348261		1459822_at	1.12103e-14	9.39389	9.40296	-0.00907161		1420699_at	4.4778e-09	12.502	12.5338	-0.0317718
1422002_at	4.44808e-17	8.74751	8.27635	0.471166		1437284_at	1.12676e-14	4.77461	5.26296	-0.488347		1439044_at	4.50102e-09	9.30242	8.91911	0.383304
1420631_a_at	4.51738e-17	6.26063	5.32158	0.939053		1453570_x_at	1.13271e-14	6.22406	5.8955	0.328556		1456065_at	4.58994e-09	7.21221	7.41243	-0.200218
1447704_s_at	4.54844e-17	5.57193	5.06211	0.509815		1447866_x_at	1.15096e-14	3.02286	3.22049	-0.197633		1419722_at	4.69526e-09	11.8039	12.0112	-0.207302
1420272_at	4.84734e-17	7.368	7.04714	0.32086		1433558_at	1.15543e-14	5.72399	5.70086	0.0231326		1424509_at	4.75428e-09	5.80953	5.93771	-0.128184
1435004_at	4.86523e-17	6.1971	6.32055	-0.123453		1455032_at	1.16133e-14	7.29323	7.35945	-0.0662222		1454799_at	4.81999e-09	2.85904	2.96952	-0.110483
1417876_at	4.97999e-17	8.80889	8.29836	0.510528		1429282_at	1.16382e-14	4.51413	4.57999	-0.0658651		1425569_a_at	4.8523e-09	9.37578	9.50178	-0.126004
1443192_at	5.04384e-17	6.28971	6.28728	0.00243733		1452028_a_at	1.17601e-14	6.62872	6.66652	-0.0377968		1450105_at	4.85381e-09	8.93537	8.86607	0.0692935
1422844_a_at	5.17054e-17	6.57903	6.63434	-0.0553086		1454683_at	1.17638e-14	3.52121	3.51463	0.00658029		1433982_at	4.85756e-09	4.77068	4.67809	0.0925913
1441840_x_at	5.19013e-17	4.62644	4.60987	0.0165685		1446075_at	1.18712e-14	7.24026	6.91272	0.327543		1453557_at	4.91284e-09	8.22226	9.40894	-1.18669
1429115_at	5.29089e-17	7.74881	7.57034	0.178472		1422705_at	1.21221e-14	10.0434	9.71893	0.324486		1420478_at	4.967e-09	9.44861	9.62067	-0.172059
1423043_s_at	5.3253e-17	9.32956	9.45391	-0.124346		1438134_at	1.22086e-14	6.43691	6.15572	0.281188		1436256_at	4.98231e-09	7.54448	7.7074	-0.162921
1452700_s_at	5.43237e-17	6.4861	6.6974	-0.211306		1454606_at	1.22697e-14	4.86977	5.02653	-0.156758		1452032_at	5.0016e-09	7.03669	6.36525	0.671431
1423042_at	5.60106e-17	5.83538	5.8725	-0.037117		1450116_at	1.23557e-14	4.84263	4.9371	-0.0944712		1456122_at	5.00255e-09	4.09486	4.32843	-0.233575
1456792_at	5.60704e-17	5.48152	5.51512	-0.0335991		1458105_at	1.24383e-14	3.15258	3.55173	-0.399147		1421324_a_at	5.02359e-09	7.87721	8.02502	-0.147818
1416617_at	5.70699e-17	8.67706	8.60355	0.0735147		1438021_at	1.24786e-14	7.02222	7.12836	-0.106142		1429418_at	5.03391e-09	4.28039	4.47054	-0.190158
1439145_at	5.76849e-17	5.47009	5.52759	-0.0575055		1420038_at	1.25034e-14	13.1534	13.1749	-0.0214378		1422772_at	5.03869e-09	8.28115	8.36241	-0.081256
1458551_at	5.79185e-17	6.37194	6.40522	-0.0332828		1417230_at	1.25234e-14	8.70916	8.52452	0.184636		1422017_s_at	5.04958e-09	8.88263	9.12515	-0.242518
1426891_at	5.83426e-17	4.66858	4.83677	-0.168186		1455589_at	1.25307e-14	2.60962	2.73605	-0.126429		1433815_at	5.11839e-09	7.75874	7.82422	-0.0654866
1440994_at	5.87748e-17	3.25021	3.24362	0.00659022		1430304_at	1.26886e-14	2.84796	2.67826	0.169702		1453064_at	5.17271e-09	9.27036	9.46795	-0.197597
1434573_at	5.89094e-17	4.30761	4.3269	-0.0192893		1437363_at	1.27216e-14	9.4638	9.17711	0.286685		1434933_at	5.2658e-09	5.62204	5.27261	0.349432
1425434_a_at	5.90957e-17	8.14443	8.53724	-0.392807		1421327_at	1.29619e-14	7.64392	7.59097	0.0529513		1420813_at	5.50508e-09	13.7413	13.7484	-0.00706409
1435433_at	5.94876e-17	7.50296	4.64831	2.85466		1419544_at	1.31341e-14	5.37323	5.25212	0.121116		1453104_at	5.53361e-09	5.49634	5.4347	0.0616318
1436122_at	6.00824e-17	5.63175	5.95628	-0.324529		1446224_at	1.31345e-14	3.13399	3.18652	-0.0525231		1430017_at	5.55014e-09	13.6114	13.5576	0.0538402
1448333_at	6.09406e-17	9.56633	7.97194	1.59439		1423481_at	1.31865e-14	6.6102	5.9834	0.626795		1439395_at	5.60644e-09	3.4807	3.75607	-0.275364
1416281_at	6.22276e-17	7.89391	7.95457	-0.0606585		1417785_at	1.32217e-14	8.03001	7.60779	0.422226		1416530_a_at	5.63823e-09	6.72207	6.74199	-0.0199219
1451516_at	6.34935e-17	2.41249	2.40298	0.00951355		1442198_at	1.33641e-14	8.97576	9.18528	-0.209526		1448710_at	5.72632e-09	14.4046	14.3931	0.0114491
1436366_at	6.4912e-17	9.10777	8.73214	0.375624		1447461_at	1.35449e-14	4.91084	4.76921	0.141627		1434515_at	5.78867e-09	4.24844	4.17843	0.0700103
1418891_a_at	6.49462e-17	7.2941	8.2307	-0.9366		1425850_a_at	1.36019e-14	4.93833	4.84555	0.0927802		1449011_at	5.79212e-09	9.78557	9.62002	0.165554
1419024_at	6.55685e-17	5.97928	6.2515	-0.272211		1458061_at	1.36358e-14	12.3126	11.3388	0.973826		1423385_at	5.86451e-09	10.2874	10.3945	-0.107123
1424990_at	6.86872e-17	5.36086	5.35434	0.00651996		1458527_at	1.36589e-14	10.8223	11.6976	-0.87531		1457638_x_at	5.88091e-09	8.45984	8.15623	0.303612
1422861_s_at	6.968e-17	8.23494	8.31075	-0.0758152		1416386_a_at	1.36641e-14	6.83163	6.70378	0.127844		1427031_s_at	5.89709e-09	8.93436	8.98443	-0.0500758
1423646_at	7.01374e-17	12.3469	12.7331	-0.386279		1457804_at	1.37442e-14	4.96274	5.04186	-0.079128		1450163_a_at	5.92358e-09	4.03108	4.28898	-0.257893
1427689_a_at	7.03006e-17	6.15472	6.08508	0.06964		1423155_at	1.38302e-14	6.09858	5.8883	0.210286		1431997_at	5.95046e-09	3.88687	4.03324	-0.146367
1448094_at	7.12481e-17	2.79464	2.86838	-0.0737444		1441217_at	1.38542e-14	8.4813	8.22493	0.256366		1440451_at	5.9854e-09	10.0217	9.20552	0.81622
1457339_at	7.14859e-17	4.19653	4.06954	0.12699		1433145_at	1.408e-14	7.40991	7.37906	0.0308429		1445956_at	6.03653e-09	11.3169	11.8477	-0.530774
1423754_at	7.15616e-17	6.84288	6.53326	0.309626		1421592_at	1.4097e-14	7.83722	7.57802	0.259194		1418510_s_at	6.03951e-09	3.60135	3.62333	-0.0219719
1420818_at	7.22514e-17	7.48495	7.80149	-0.316546		1422557_s_at	1.4564e-14	8.6964	8.4184	0.277999		1424923_at	6.09722e-09	6.61581	6.82584	-0.21003
1431704_a_at	7.27085e-17	6.09242	6.1247	-0.0322817		1459015_at	1.46078e-14	5.20946	5.31159	-0.102127		1424424_at	6.20165e-09	3.11618	3.15971	-0.0435239
1424824_at	7.41262e-17	8.79919	9.04856	-0.249369		1441840_x_at	1.46208e-14	6.01094	6.08652	-0.0755786		1448429_at	6.20941e-09	7.37332	7.48969	-0.116368
1419178_at	7.52878e-17	8.61616	8.19657	0.41959		1441424_at	1.49306e-14	3.4216	3.48999	-0.0683975		1460204_at	6.22273e-09	8.6454	8.58135	0.0640478
1452717_at	7.54728e-17	5.38628	5.38719	-0.000903038		1457261_at	1.49617e-14	4.33882	4.46636	-0.127547		1450509_at	6.25101e-09	5.76378	5.81658	-0.0528057
1446280_at	7.78297e-17	6.13065	5.90533	0.225319		1448267_at	1.50697e-14	6.82143	6.73332	0.0881134		1418591_at	6.39508e-09	7.7631	7.89273	-0.129623
1426907_s_at	7.8863e-17	6.59879	6.45589	0.1429		1438213_at	1.51386e-14	6.7541	6.0278	0.726304		1452316_at	6.44221e-09	7.53498	7.5761	-0.0411257
1423829_at	7.98907e-17	7.94337	7.83566	0.107701		1448613_at	1.5146e-14	5.75254	5.60129	0.15125		1431804_a_at	6.51303e-09	3.74033	3.75383	-0.0135013
1428579_at	8.12177e-17	5.8805	6.02338	-0.142877		1451206_s_at	1.52163e-14	6.12017	6.14294	-0.0227721		1430394_a_at	6.5573e-09	5.38075	5.77197	-0.391217
1450044_at	8.31433e-17	7.90844	7.84254	0.0659016		1426172_a_at	1.52173e-14	9.87668	9.56375	0.312927		1415762_x_at	6.59507e-09	8.53657	8.87637	-0.339799
1442098_at	8.36757e-17	3.49573	3.48168	0.0140553		1420373_at	1.53263e-14	6.4662	6.3217	0.144506		1422796_at	6.64081e-09	6.46969	6.71485	-0.245156
1454850_at	8.6451e-17	5.33521	5.4937	-0.158488		1437185_s_at	1.56589e-14	8.73391	8.29494	0.438971		1454942_at	6.7015e-09	3.76728	3.81519	-0.0479085
1448742_at	9.20368e-17	7.34223	7.31516	0.0270701		1450259_a_at	1.56656e-14	3.20976	2.96711	0.242655		1450339_a_at	6.73114e-09	3.83794	3.95124	-0.113295
1440216_at	9.34019e-17	5.4346	5.30109	0.133506		1426668_at	1.62153e-14	7.75807	7.72316	0.0349155		1415761_at	6.82663e-09	8.32393	8.68151	-0.357576
1437245_at	9.34735e-17	6.48404	6.52027	-0.0362318		1444799_at	1.62262e-14	7.6571	7.16633	0.490768		1431939_a_at	6.8788e-09	5.79848	6.61211	-0.813624
1451174_at	9.42102e-17	6.44816	6.72404	-0.275875		1454517_at	1.6318e-14	8.52757	9.06023	-0.53266		1434746_at	6.8938e-09	7.09726	7.09978	-0.00252014
1452414_s_at	9.4865e-17	5.49686	5.48839	0.00846565		1442688_at	1.64238e-14	4.45073	4.61083	-0.160096		1448886_at	6.941e-09	7.34386	7.40329	-0.0594288
1451601_a_at	9.78471e-17	6.00781	6.1224	-0.114588		1444565_at	1.65246e-14	4.44263	4.45914	-0.0165081		1440688_at	6.97066e-09	4.32301	4.57576	-0.25275
1439839_at	9.9372e-17	3.71401	3.59744	0.116568		1434279_at	1.70616e-14	3.65563	3.6814	-0.0257722		1423088_at	7.09704e-09	9.14496	8.93048	0.21448
1455695_at	1.01994e-16	7.17077	7.1933	-0.0225297		1425685_at	1.75452e-14	6.17241	6.24681	-0.0743927		1434843_at	7.10426e-09	9.05671	9.45437	-0.397662
1435955_at	1.05775e-16	13.4197	13.1198	0.299936		1422862_at	1.7555e-14	11.4859	11.5117	-0.0258122		1417254_at	7.12532e-09	9.74031	9.86908	-0.128767
1437016_x_at	1.12726e-16	5.24569	5.39416	-0.148475		1421410_a_at	1.78311e-14	8.25945	8.39152	-0.132072		1419098_at	7.13297e-09	9.25879	7.55302	1.70577
1418741_at	1.1343e-16	9.1516	8.93048	0.221117		1442326_at	1.80102e-14	3.225	3.45143	-0.226429		1424459_at	7.13885e-09	5.89035	6.0639	-0.173548
1416382_at	1.14924e-16	9.88157	9.86908	0.0124983		1428215_x_at	1.81169e-14	3.39739	3.30165	0.0957456		1437476_at	7.31271e-09	6.05485	6.24396	-0.189114
1431469_a_at	1.15771e-16	6.39224	6.27069	0.121552		1430867_at	1.82466e-14	5.0348	4.95787	0.076934		1460210_at	7.3731e-09	3.95413	3.90901	0.0451188
1454938_at	1.19731e-16	5.04598	4.9692	0.0767822		1424874_a_at	1.83707e-14	11.3395	11.2187	0.120804		1456433_at	7.39194e-09	8.20058	8.31763	-0.117042
1453283_at	1.22853e-16	6.68401	6.73812	-0.0541114		1430797_at	1.843e-14	5.60602	5.57647	0.0295437		1437848_x_at	7.4529e-09	9.36575	9.29178	0.0739718
1436779_at	1.25848e-16	8.85542	8.46519	0.390233		1434652_at	1.85363e-14	6.34846	5.82279	0.525673		1450188_s_at	7.47401e-09	4.49905	4.66856	-0.169509
1427532_at	1.26198e-16	5.81267	5.83799	-0.0253204		1432798_at	1.85785e-14	4.14715	4.11309	0.034056		1445229_at	7.48838e-09	7.11625	6.75436	0.361897
1434311_at	1.26635e-16	6.24388	6.32805	-0.0841702		1448297_a_at	1.87916e-14	6.27114	6.23637	0.0347727		1416577_a_at	7.61912e-09	9.20945	9.38836	-0.178906
1435440_at	1.30001e-16	6.18218	5.95787	0.224312		1452490_a_at	1.89136e-14	5.63404	5.84752	-0.213479		1451977_at	7.72221e-09	5.56974	6.14673	-0.576992
1422259_a_at	1.31227e-16	6.41026	6.20546	0.204797		1428579_at	1.89992e-14	7.2089	7.16398	0.0449178		1428466_at	7.7376e-09	6.74166	6.58866	0.152999
1427243_at	1.33316e-16	6.99509	6.67087	0.324221		1428946_at	1.90021e-14	2.68169	2.68672	-0.00502569		1454635_at	7.73875e-09	7.47127	7.55858	-0.0873086
1453007_at	1.3461e-16	6.02957	6.1277	-0.0981253		1444846_at	1.92817e-14	4.74625	4.47673	0.269518		1446939_at	7.83813e-09	6.83414	7.18059	-0.34645
1450024_at	1.34683e-16	5.17687	5.41532	-0.238453		1436743_at	1.93558e-14	7.15472	6.90591	0.24881		1451988_s_at	7.90295e-09	3.03759	2.95471	0.0828827
1429520_a_at	1.36586e-16	4.41962	4.42923	-0.0096097		1419082_at	1.95971e-14	8.61616	8.18745	0.428712		1437637_at	7.90538e-09	8.56098	8.61365	-0.0526712
1417856_at	1.38766e-16	6.88772	6.71501	0.172705		1417250_at	1.97964e-14	6.67153	6.65837	0.0131641		1455436_at	7.96597e-09	6.77494	6.05097	0.72397
1451037_at	1.38924e-16	6.75589	6.9955	-0.239606		1446661_at	2.01198e-14	5.29904	5.31211	-0.0130724		1426483_at	7.99616e-09	6.15114	5.98031	0.170826
1421858_at	1.39536e-16	9.21138	8.57732	0.63406		1425281_a_at	2.07162e-14	9.34316	8.84442	0.498732		1429295_s_at	7.99681e-09	7.1931	7.21959	-0.0264867
1435227_at	1.4158e-16	7.99068	8.18681	-0.196135		1451742_a_at	2.09877e-14	3.07558	3.01875	0.0568301		1450733_at	8.13398e-09	5.39907	5.39905	1.16927e-05
1450623_at	1.42217e-16	9.13087	10.07	-0.939104		1460155_at	2.09921e-14	5.10281	5.09914	0.003673		1426988_at	8.15453e-09	8.34954	8.43177	-0.0822219
1421854_at	1.44311e-16	6.70015	6.60693	0.0932235		1438075_at	2.13409e-14	5.0018	5.1055	-0.103703		1426754_x_at	8.16628e-09	6.40567	6.3368	0.0688704
1428719_at	1.45566e-16	7.93046	7.81208	0.118386		1415998_at	2.15072e-14	9.24063	9.15446	0.0861696		1439466_s_at	8.19384e-09	6.00816	6.20156	-0.193404
1428207_at	1.46901e-16	5.58502	5.71507	-0.130058		1425096_a_at	2.15853e-14	7.47512	7.6062	-0.131082		1420485_at	8.22654e-09	8.2429	7.59041	0.652491
1426672_at	1.48944e-16	7.25539	7.56323	-0.307837		1446121_at	2.23402e-14	10.7357	10.7987	-0.0630416		1425451_s_at	8.22813e-09	6.18492	5.8756	0.309325
1427912_at	1.53167e-16	5.77808	5.13222	0.645865		1442774_x_at	2.25661e-14	4.74105	4.7156	0.0254495		1448149_at	8.23583e-09	6.58181	6.72716	-0.145357
1442264_at	1.55858e-16	3.40681	3.40674	7.02981e-05		1419579_at	2.28598e-14	6.48085	6.43427	0.0465837		1437393_at	8.23683e-09	4.77476	4.91004	-0.135273
1433910_at	1.56211e-16	7.25542	7.30472	-0.0493001		1442989_at	2.29775e-14	3.61813	3.7889	-0.170775		1421229_at	8.25295e-09	7.24528	7.4191	-0.173818
1428083_at	1.56635e-16	7.13755	6.83323	0.304328		1419406_a_at	2.31179e-14	8.04832	7.64105	0.407269		1434620_s_at	8.30776e-09	4.29251	4.59373	-0.301224
1426227_s_at	1.57831e-16	3.36597	3.34255	0.0234206		1429732_at	2.3154e-14	5.45631	5.23443	0.221886		1426750_at	8.45805e-09	7.22469	7.59016	-0.365473
1436423_at	1.59362e-16	3.49822	3.56466	-0.0664419		1451036_at	2.34196e-14	5.83916	4.31886	1.52031		1448970_at	8.5542e-09	8.05625	7.83069	0.225561
1449968_s_at	1.65523e-16	9.77989	9.63438	0.145511		1449996_a_at	2.38569e-14	4.59952	4.84736	-0.247837		1421534_at	8.57343e-09	12.7186	12.633	0.0856238
1417730_at	1.6632e-16	7.17182	6.90228	0.269538		1425438_at	2.40714e-14	5.98454	5.38599	0.598552		1447734_x_at	8.60015e-09	8.06394	8.23854	-0.174607
1455032_at	1.70619e-16	5.5544	5.1853	0.369098		1428517_at	2.41437e-14	5.44916	5.3138	0.135359		1423745_at	8.63173e-09	9.89566	9.94582	-0.0501586
1419603_at	1.70693e-16	5.10588	4.94209	0.163791		1457044_at	2.42944e-14	7.56396	7.25136	0.312594		1451703_s_at	8.65385e-09	6.39774	6.69618	-0.298437
1421398_at	1.72459e-16	5.52492	5.08005	0.444868		1422002_at	2.43192e-14	5.25675	5.41499	-0.158244		1433463_at	8.66353e-09	7.83131	7.65498	0.176329
1437003_at	1.73563e-16	5.974	6.02514	-0.0511473		1438623_x_at	2.43865e-14	4.1405	4.19379	-0.0532941		1434316_at	8.7074e-09	5.72126	5.66117	0.0600851
1452389_at	1.75036e-16	6.44952	6.50435	-0.0548346		1439427_at	2.46698e-14	4.88991	4.81796	0.0719439		1416497_at	8.77453e-09	7.65065	7.8657	-0.21505
1420413_at	1.78975e-16	11.2097	10.9417	0.267952		1438439_at	2.48618e-14	4.13273	4.19913	-0.0663936		1457722_at	8.78684e-09	6.99586	7.01126	-0.0153996
1455285_at	1.86751e-16	3.92303	4.00491	-0.0818784		1428381_a_at	2.52025e-14	7.63266	7.46099	0.171669		1423632_at	8.83979e-09	12.1589	11.9721	0.186788
1451950_a_at	2.01767e-16	4.02943	4.00766	0.0217646		1450964_a_at	2.52699e-14	7.70364	7.95844	-0.254801		1427232_at	8.85507e-09	11.7976	11.7552	0.0424519
1428192_at	2.0179e-16	7.00683	7.28354	-0.27671		1421884_at	2.52865e-14	5.26771	5.17957	0.0881398		1423894_a_at	8.8991e-09	8.71642	8.69124	0.0251825
1454734_at	2.04266e-16	7.06924	6.87177	0.197467		1443167_at	2.55462e-14	6.55862	6.10763	0.450983		1452878_at	8.96568e-09	7.88316	7.95997	-0.0768022
1460430_at	2.0642e-16	3.96573	3.80962	0.156112		1423054_at	2.56784e-14	7.03878	6.05781	0.980971		1448541_at	9.03585e-09	12.3823	12.7331	-0.350792
1435644_at	2.10269e-16	8.31873	4.96811	3.35062		1428942_at	2.57399e-14	7.39579	7.41994	-0.0241563		1443889_at	9.03689e-09	5.04597	5.27312	-0.227152
1449342_at	2.11246e-16	7.75749	7.76617	-0.00868541		1450370_a_at	2.58199e-14	5.58915	5.55486	0.034285		1441657_at	9.20126e-09	3.28714	3.35373	-0.0665891
1420609_at	2.13412e-16	9.3576	7.56266	1.79494		1423167_at	2.58747e-14	6.81346	7.02933	-0.215872		1435596_at	9.27892e-09	6.4904	6.48532	0.00507863
1448904_at	2.13628e-16	4.07276	4.07081	0.00195865		1452483_a_at	2.60755e-14	5.14687	5.02151	0.12536		1441725_at	9.32847e-09	8.07484	7.97209	0.102743
1450106_a_at	2.24415e-16	7.21708	7.27606	-0.0589794		1426554_a_at	2.60904e-14	6.89276	6.52743	0.365332		1425914_a_at	9.36387e-09	8.55711	8.52911	0.0279951
1417640_at	2.25948e-16	7.74928	7.40432	0.344962		1446348_at	2.63639e-14	3.0377	2.98471	0.0529926		1455556_at	9.48398e-09	7.15842	7.31412	-0.155693
1457579_at	2.31073e-16	5.52877	5.47296	0.0558145		1416359_at	2.64545e-14	3.5344	3.51994	0.0144598		1451091_at	9.50422e-09	5.69228	5.74791	-0.05563
1449363_at	2.34735e-16	5.17298	5.36051	-0.187526		1445318_at	2.68071e-14	6.297	6.14261	0.154385		1442299_at	9.54812e-09	9.09549	8.82751	0.26798
1434054_at	2.4023e-16	7.24028	7.21351	0.0267711		1442415_at	2.69695e-14	5.56785	5.60022	-0.0323742		1436562_at	9.54863e-09	12.8049	12.8812	-0.0763516
1439443_x_at	2.41558e-16	6.03341	6.04071	-0.00730102		1442983_at	2.70324e-14	4.15124	4.22436	-0.073118		1418174_at	9.57835e-09	3.44997	3.39841	0.0515555
1425226_x_at	2.43303e-16	3.8566	3.95347	-0.0968777		1444744_at	2.70444e-14	8.9348	8.63928	0.295525		1460700_at	9.68775e-09	8.04682	7.8333	0.213514
1423838_s_at	2.43665e-16	6.95096	6.68358	0.267385		1422063_a_at	2.7059e-14	6.31051	5.71667	0.593836		1460437_at	9.69547e-09	10.0278	9.35761	0.670208
1444078_at	2.48314e-16	4.74602	4.70695	0.0390671		1435766_at	2.71168e-14	2.94561	3.06502	-0.119415		1417444_at	9.83352e-09	6.71288	6.68406	0.0288245
1423647_a_at	2.49608e-16	5.16907	5.14244	0.0266304		1436101_at	2.74473e-14	4.51228	4.61518	-0.102901		1431381_at	9.84583e-09	5.18176	5.44906	-0.267298
1428243_at	2.51231e-16	7.08898	7.34572	-0.256747		1436540_at	2.78373e-14	6.35806	6.11958	0.238476		1451086_s_at	9.90278e-09	6.95983	7.09075	-0.130918
1437752_at	2.52279e-16	4.45057	4.50953	-0.0589618		1450970_at	2.88607e-14	6.07268	6.01415	0.0585249		1434424_at	9.97555e-09	5.16328	5.22837	-0.0650911
1429123_at	2.54085e-16	6.13469	5.97878	0.155914		1438187_at	2.88911e-14	3.523	3.47125	0.0517458		1447789_x_at	9.99003e-09	7.11493	7.20031	-0.0853809
1434123_at	2.60114e-16	5.68545	4.68584	0.99961		1453253_a_at	2.93696e-14	7.73884	7.33918	0.399657		1437628_s_at	9.99209e-09	13.8622	13.9896	-0.127458
1449037_at	2.61192e-16	6.68962	6.76657	-0.0769488		1425819_at	2.95299e-14	5.8853	5.7324	0.1529		1447231_at	1.00544e-08	11.5348	10.9097	0.625159
1434958_at	2.70971e-16	9.31546	8.96774	0.347719		1418177_at	2.99951e-14	6.18468	5.99328	0.191399		1448999_at	1.0149e-08	12.3426	12.2847	0.0579351
1435342_at	2.71349e-16	5.82175	5.84692	-0.0251675		1440085_at	3.00177e-14	5.00966	4.92021	0.0894508		1420839_at	1.02063e-08	6.84557	6.55414	0.291433
1418649_at	2.84569e-16	8.02021	7.94723	0.0729772		1423619_at	3.00267e-14	5.17258	4.59241	0.58017		1416357_a_at	1.02355e-08	13.3478	13.3381	0.00970863
1460300_a_at	2.89194e-16	6.4207	6.4199	0.000798681		1449858_at	3.02559e-14	6.91202	7.03761	-0.12559		1460119_at	1.03698e-08	6.19857	6.21423	-0.015661
1448772_at	2.91853e-16	8.33776	8.22484	0.112917		1450786_x_at	3.02566e-14	4.66116	4.67393	-0.0127644		1449984_at	1.03771e-08	7.29669	7.31978	-0.023086
1425026_at	2.93644e-16	6.52952	6.75433	-0.224816		1426842_at	3.0366e-14	6.73713	6.79443	-0.0572944		1426648_at	1.05297e-08	5.58857	5.80251	-0.213947
1443258_at	2.93677e-16	4.47374	4.24874	0.225002		1433937_at	3.04323e-14	4.42421	4.0293	0.394908		1454857_at	1.06671e-08	7.30661	7.13514	0.171472
1422612_at	2.93771e-16	9.35924	9.0663	0.292945		1445263_at	3.06215e-14	5.93929	5.79437	0.144914		1440028_at	1.0722e-08	7.03684	6.9743	0.0625406
1452809_at	2.96514e-16	7.95617	7.97465	-0.0184734		1429379_at	3.08043e-14	4.16934	4.19782	-0.0284746		1423736_a_at	1.07477e-08	6.89108	7.04398	-0.152894
1417296_at	2.97267e-16	5.86258	5.878	-0.0154247		1420640_at	3.10161e-14	6.86712	6.83703	0.0300916		1425570_at	1.07588e-08	11.0828	11.4066	-0.323872
1418625_s_at	3.01431e-16	8.62484	8.36241	0.262433		1451436_at	3.10288e-14	8.84984	9.01939	-0.169546		1452178_at	1.07731e-08	7.40397	7.33818	0.0657896
1419203_at	3.08406e-16	6.09314	5.64597	0.447165		1435440_at	3.12457e-14	6.57582	6.40356	0.172256		1432548_at	1.08388e-08	6.30062	6.60241	-0.301784
1425027_s_at	3.15335e-16	5.36516	5.33902	0.0261398		1416011_x_at	3.14521e-14	9.71431	9.20945	0.504854		1423566_a_at	1.08646e-08	4.47528	4.62223	-0.146951
1423319_at	3.18823e-16	3.3703	3.07719	0.293115		1420449_at	3.21107e-14	9.55979	9.36783	0.191965		1452196_a_at	1.08725e-08	12.8241	12.919	-0.0949499
1424977_at	3.26933e-16	6.72631	6.43925	0.287057		1436077_a_at	3.25544e-14	6.80007	6.68485	0.115223		1426344_at	1.09497e-08	6.57733	6.62997	-0.05264
1436161_at	3.27552e-16	3.96048	3.78013	0.180347		1422477_at	3.34416e-14	8.12599	8.33027	-0.20428		1429515_at	1.09623e-08	7.77271	7.68015	0.0925675
1429950_at	3.30651e-16	4.71383	4.6657	0.0481236		1437539_at	3.34523e-14	6.74052	6.38553	0.354996		1416067_at	1.09682e-08	8.77668	9.16099	-0.384313
1427667_s_at	3.33976e-16	9.70849	9.93344	-0.224952		1425550_a_at	3.36226e-14	7.29567	7.10354	0.192133		1446245_at	1.1101e-08	8.58866	8.83964	-0.250978
1448361_at	3.37332e-16	4.00292	3.96755	0.0353686		1450846_at	3.41177e-14	6.52529	6.51097	0.0143266		1454734_at	1.12188e-08	6.05904	5.83011	0.228922
1455700_at	3.37647e-16	4.2539	4.29891	-0.0450106		1423837_at	3.43856e-14	4.14077	3.9943	0.146464		1454092_a_at	1.1354e-08	6.51801	6.70817	-0.19016
1428154_s_at	3.40379e-16	4.92016	4.94862	-0.0284551		1419917_s_at	3.44926e-14	8.34706	7.26612	1.08094		1420704_at	1.139e-08	9.89869	9.77627	0.122418
1415779_s_at	3.48308e-16	12.1974	12.3251	-0.127737		1444459_at	3.46354e-14	9.8544	10.1418	-0.287393		1421871_at	1.14091e-08	11.2889	10.4969	0.792003
1427691_a_at	3.48523e-16	7.83229	7.12431	0.707979		1450081_x_at	3.49138e-14	5.69446	5.90136	-0.206904		1446617_at	1.15106e-08	6.55285	6.64143	-0.0885735
1456290_x_at	3.48582e-16	8.96221	8.19661	0.765599		1457409_at	3.50595e-14	8.30321	8.45159	-0.148384		1416230_at	1.15725e-08	6.65854	6.72816	-0.0696223
1418300_a_at	3.55846e-16	9.77772	7.76926	2.00846		1425561_at	3.5532e-14	8.21501	7.11409	1.10093		1438097_at	1.15841e-08	8.89495	8.95087	-0.0559204
1434175_s_at	3.6147e-16	5.56167	5.65281	-0.091142		1417068_a_at	3.56684e-14	4.75118	4.43374	0.31744		1429570_at	1.16445e-08	6.31291	6.54546	-0.232547
1456540_s_at	3.65349e-16	5.27882	5.29312	-0.0143028		1421568_at	3.59624e-14	4.83007	4.83878	-0.00871291		1455353_at	1.17105e-08	6.73265	7.16166	-0.429009
1434895_s_at	3.67918e-16	5.24797	5.38593	-0.13797		1460319_at	3.64572e-14	2.51674	2.70195	-0.18521		1417847_at	1.17335e-08	5.8397	5.87556	-0.0358588
1439478_at	3.7363e-16	3.15145	2.99493	0.156512		1449601_x_at	3.64911e-14	3.50716	3.74394	-0.23678		1427970_at	1.19654e-08	6.64422	6.83188	-0.187659
1434034_at	3.74645e-16	6.42047	6.51945	-0.0989791		1454593_at	3.65297e-14	4.97035	4.41219	0.558158		1416958_at	1.19921e-08	9.75648	9.87938	-0.122899
1448396_at	3.75808e-16	6.98195	6.87663	0.105316		1415778_at	3.66576e-14	9.10165	9.35226	-0.250602		1453636_at	1.21075e-08	4.62439	4.67473	-0.0503432
1451860_a_at	3.7821e-16	5.90824	5.89415	0.0140904		1440355_at	3.67689e-14	7.25822	7.26341	-0.00518738		1433563_s_at	1.21547e-08	6.16657	6.40199	-0.23542
1437225_x_at	3.79451e-16	6.43914	6.54293	-0.103794		1425956_a_at	3.69235e-14	6.41504	6.4904	-0.0753594		1419676_at	1.21651e-08	3.69766	3.71078	-0.0131155
1448318_at	3.92915e-16	5.96247	6.66295	-0.700481		1460034_at	3.69453e-14	3.98808	3.85856	0.129511		1439278_at	1.22261e-08	6.52743	6.42988	0.0975461
1430148_at	3.93652e-16	6.61148	6.59111	0.0203764		1426865_a_at	3.73648e-14	6.94763	6.67598	0.271646		1422064_a_at	1.22262e-08	6.3272	6.21841	0.108786
1452359_at	3.98981e-16	5.4522	5.9317	-0.479499		1423058_at	3.74997e-14	4.67258	4.37621	0.296363		1441807_s_at	1.22493e-08	7.285	7.32266	-0.0376544
1431694_a_at	4.0202e-16	7.13727	7.18566	-0.0483881		1452627_at	3.75534e-14	6.16274	6.1717	-0.00895723		1437223_s_at	1.22644e-08	7.19489	7.54299	-0.3481
1454976_at	4.09879e-16	4.34989	4.27068	0.0792062		1450634_at	3.76596e-14	4.73056	4.33707	0.393493		1430667_at	1.23477e-08	12.9338	13.2047	-0.270899
1434091_at	4.10802e-16	4.32219	4.45307	-0.130879		1445732_at	3.9472e-14	6.7378	5.98335	0.754449		1433977_at	1.24123e-08	2.58263	2.5289	0.0537348
1426772_x_at	4.11551e-16	6.40093	6.6265	-0.225577		1432285_at	3.98257e-14	4.78057	4.52656	0.254009		1425628_a_at	1.24567e-08	6.4484	6.50089	-0.0524867
1452067_at	4.41179e-16	5.48259	5.43866	0.0439211		1441797_at	4.03126e-14	3.35525	3.20314	0.152105		1429042_at	1.24885e-08	3.55991	3.59343	-0.0335189
1443354_at	4.46536e-16	5.38378	5.47605	-0.0922755		1418035_a_at	4.0553e-14	11.3366	11.4951	-0.158422		1427412_s_at	1.24921e-08	6.16942	6.32354	-0.154117
1438330_at	4.53656e-16	3.71666	3.75091	-0.0342523		1425433_a_at	4.10864e-14	3.66646	3.57439	0.092064		1448202_x_at	1.25059e-08	8.43149	7.39478	1.03671
1436758_at	4.54955e-16	8.19278	7.47308	0.719693		1433588_at	4.19995e-14	5.35181	5.57856	-0.22675		1426240_at	1.25357e-08	8.00929	8.15756	-0.148268
1434286_at	4.61721e-16	10.8594	10.8591	0.000315772		1449209_a_at	4.25252e-14	8.85086	8.5574	0.293465		1424846_at	1.26737e-08	8.01701	8.57404	-0.557029
1449516_a_at	4.65582e-16	4.02065	4.02111	-0.000462954		1460088_at	4.25929e-14	6.27599	6.14156	0.134433		1431233_at	1.27769e-08	5.57656	5.62757	-0.0510079
1434424_at	4.76203e-16	6.39272	6.47976	-0.0870411		1442276_at	4.30529e-14	6.77959	6.75475	0.0248485		1416084_at	1.28251e-08	10.6314	10.8031	-0.171773
1424707_at	4.94002e-16	8.73832	8.86328	-0.124957		1458155_at	4.30832e-14	6.38096	5.82672	0.55424		1429554_at	1.28624e-08	8.34361	8.26331	0.0803081
1417508_at	4.95538e-16	9.46981	9.55468	-0.0848745		1429960_at	4.31918e-14	7.98404	7.5594	0.424644		1436845_at	1.28872e-08	7.83298	7.63271	0.20027
1444122_at	4.98053e-16	6.49696	6.57897	-0.0820097		1431625_at	4.33695e-14	6.84345	6.99171	-0.148261		1425587_a_at	1.29696e-08	5.3876	5.40135	-0.0137556
1419757_at	5.05593e-16	8.05921	8.39845	-0.33924		1448170_at	4.34962e-14	7.79454	7.32846	0.466081		AFFX-GapdhMur/M32599_3_at	1.2978e-08	13.6412	13.5311	0.110029
1421228_at	5.07091e-16	6.2709	6.28791	-0.0170084		1460182_at	4.40318e-14	2.83894	2.81221	0.026733		1431421_x_at	1.30047e-08	5.27108	5.5534	-0.282321
1425215_at	5.08092e-16	7.02036	7.14242	-0.122056		1439205_at	4.41186e-14	8.03184	7.35648	0.675355		1442001_at	1.30302e-08	7.19778	7.38567	-0.18789
1434998_at	5.19658e-16	4.59307	4.60554	-0.0124764		1433981_s_at	4.41591e-14	3.52305	3.50349	0.0195574		1434791_at	1.30651e-08	7.92405	7.8071	0.116955
1423313_at	5.25278e-16	8.48296	8.33908	0.143873		1418929_at	4.42345e-14	9.27134	9.1749	0.09644		1452521_a_at	1.3106e-08	2.89432	2.91789	-0.0235748
1423837_at	5.26481e-16	9.94363	9.62002	0.323614		1439690_at	4.4893e-14	4.92019	4.86813	0.0520662		1426433_at	1.31232e-08	9.78376	9.46432	0.319442
1421926_at	5.28534e-16	5.7311	5.41775	0.313345		1444938_at	4.53726e-14	9.42958	9.31396	0.115615		1456477_at	1.32011e-08	3.60113	3.76777	-0.166645
1437341_x_at	5.38432e-16	6.84642	6.82751	0.0189112		1447183_at	4.5544e-14	6.85597	6.91858	-0.0626158		1451552_at	1.34878e-08	6.07328	6.1188	-0.0455252
1460651_at	5.43562e-16	9.66982	9.94744	-0.277622		1428969_at	4.55643e-14	3.75865	3.79407	-0.0354108		1426602_at	1.3642e-08	6.57149	7.25987	-0.688381
1442643_at	5.59097e-16	6.02759	6.06503	-0.0374419		1459662_at	4.60889e-14	5.7987	6.29983	-0.50113		1426918_at	1.36739e-08	6.4693	6.61462	-0.145314
1450868_at	5.60311e-16	5.63079	5.84316	-0.212372		1416471_at	4.61337e-14	8.9407	8.82233	0.118369		1455734_at	1.36861e-08	6.25383	6.02077	0.233063
1449099_at	5.69822e-16	9.29263	7.60931	1.68332		1460463_at	4.62379e-14	13.4379	13.504	-0.0660502		1424034_at	1.37022e-08	8.51717	8.72128	-0.204114
1426159_x_at	5.86198e-16	4.61918	4.74304	-0.123856		1454074_a_at	4.6253e-14	5.43616	4.56548	0.870678		1421571_a_at	1.37679e-08	8.54704	8.80598	-0.258944
1425241_a_at	5.9137e-16	7.56291	7.188	0.374911		1436387_at	4.77565e-14	4.5063	4.59875	-0.0924443		1427831_s_at	1.37852e-08	7.5398	7.55454	-0.0147407
1426812_a_at	6.03764e-16	6.01921	6.07938	-0.0601718		1439074_a_at	4.77612e-14	5.0139	5.06547	-0.0515719		1422752_at	1.40001e-08	9.46	9.58365	-0.123655
1439146_s_at	6.15906e-16	9.66464	9.92794	-0.263293		1450711_at	4.80744e-14	5.74928	5.70456	0.0447166		1416554_at	1.40031e-08	7.06513	7.26479	-0.199664
1431698_at	6.18497e-16	5.80144	5.86047	-0.0590311		1426977_at	4.85261e-14	3.83751	4.00262	-0.165109		1433978_at	1.40611e-08	3.4898	3.57734	-0.0875389
1440454_at	6.30083e-16	2.5874	2.59486	-0.00745936		1440178_x_at	4.85659e-14	6.18916	5.98359	0.205562		1430443_at	1.40898e-08	6.90715	7.08682	-0.179665
1453064_at	6.42312e-16	4.701	4.57983	0.121168		1433257_at	4.85789e-14	5.43265	5.16228	0.270373		1428941_at	1.41136e-08	6.63575	7.05605	-0.420295
1425854_x_at	6.60055e-16	9.51059	9.34589	0.164702		1447327_at	4.8803e-14	5.32125	5.5218	-0.200546		1423790_at	1.41332e-08	6.36934	6.2515	0.117846
1422791_at	6.70432e-16	4.44599	4.40931	0.0366752		1441833_at	4.88884e-14	5.97804	6.15142	-0.17338		1436366_at	1.43959e-08	2.95602	2.92965	0.0263683
AFFX-GapdhMur/M32599_5_at	6.71133e-16	9.83534	9.99114	-0.155803		1460501_at	4.89641e-14	6.1082	5.70773	0.400471		1452466_a_at	1.44088e-08	5.81126	5.87654	-0.0652831
1438115_a_at	6.81199e-16	7.39339	7.31119	0.082198		1449175_at	4.90391e-14	9.47387	8.91234	0.561529		1418146_a_at	1.44151e-08	10.1697	9.8942	0.275453
1446669_at	6.87107e-16	8.80187	8.75272	0.0491487		1427502_at	4.9214e-14	5.5499	5.67419	-0.12429		1434273_at	1.45592e-08	5.53427	5.59313	-0.0588588
1426752_at	7.03917e-16	4.02955	4.02867	0.000886665		1434622_at	4.9552e-14	4.93858	4.93796	0.000616447		1424066_at	1.46306e-08	8.85489	8.69073	0.16416
1418634_at	7.12341e-16	6.73652	6.71485	0.021668		1418741_at	4.98872e-14	6.97541	6.74904	0.226371		1428714_at	1.47272e-08	7.45061	7.40108	0.0495297
1448892_at	7.41109e-16	3.67302	3.66266	0.0103555		1457546_at	5.02999e-14	5.87623	5.95813	-0.0819036		1450113_at	1.47757e-08	7.99891	8.48181	-0.482896
1434581_at	7.56352e-16	7.68762	6.98502	0.702601		1434384_at	5.05765e-14	11.9402	11.4306	0.509586		1434696_at	1.48508e-08	5.94496	6.1888	-0.243844
1455290_at	7.82514e-16	6.26048	6.29942	-0.0389428		1451757_at	5.08695e-14	5.14994	5.20473	-0.054799		1443729_at	1.48639e-08	3.55113	3.59847	-0.047336
1435674_at	8.17257e-16	7.1245	7.14483	-0.0203323		1456473_x_at	5.09966e-14	5.02421	5.18254	-0.158333		1423320_at	1.5052e-08	8.00677	7.90215	0.104619
1440615_at	8.26351e-16	3.12827	3.18733	-0.0590579		1443017_at	5.11039e-14	5.17852	5.28218	-0.103656		1455051_at	1.52104e-08	12.3288	12.2989	0.0298549
1437688_x_at	8.32193e-16	6.36874	6.21442	0.154322		1432776_at	5.14127e-14	3.98858	4.24121	-0.252631		1418433_at	1.52327e-08	7.40607	7.34543	0.0606326
1436649_at	8.34732e-16	2.79716	2.86328	-0.0661209		1450690_at	5.16014e-14	3.96398	4.05101	-0.0870336		1448569_at	1.52343e-08	7.47328	7.42222	0.0510582
1416083_at	8.49062e-16	9.24063	9.43276	-0.192126		1431691_a_at	5.21289e-14	6.71455	6.62605	0.0884971		1419099_x_at	1.53601e-08	3.07184	3.20606	-0.13422
1456632_at	8.51047e-16	2.98069	3.11108	-0.130392		1443888_at	5.24719e-14	4.67382	5.11142	-0.437599		1424180_a_at	1.54099e-08	7.92907	7.71866	0.210408
1452844_at	8.56742e-16	6.30349	6.28515	0.0183382		1457728_at	5.28582e-14	2.8338	2.79403	0.0397729		1438620_x_at	1.5496e-08	7.9096	8.13616	-0.226563
1415770_at	8.56853e-16	10.7303	10.9115	-0.181261		1443263_at	5.29611e-14	4.96333	4.86633	0.0970007		1419285_s_at	1.56399e-08	5.64411	5.5679	0.0762131
1419068_at	8.67397e-16	6.25285	6.24669	0.00616036		1446248_at	5.30813e-14	6.55355	6.02004	0.533508		1427739_a_at	1.56963e-08	7.63167	7.55048	0.0811916
1454880_s_at	8.67935e-16	4.58465	4.63863	-0.0539865		1450009_at	5.34998e-14	3.88955	3.70153	0.188021		1435758_at	1.60191e-08	5.74828	5.83307	-0.0847886
1426786_s_at	8.70853e-16	7.41033	7.16227	0.248063		1419149_at	5.59362e-14	8.88724	8.71994	0.167292		1438430_at	1.6187e-08	4.76738	4.78117	-0.0137913
1448239_at	8.75207e-16	6.08624	5.9931	0.0931435		1426635_at	5.62041e-14	10.6323	10.8115	-0.17921		1450200_s_at	1.62073e-08	7.63554	7.62668	0.00886394
1418216_at	8.80326e-16	8.47301	9.29089	-0.817885		1428063_at	5.66705e-14	7.64374	7.08272	0.561022		1421027_a_at	1.62578e-08	7.65691	7.69564	-0.0387388
1454979_at	8.84122e-16	4.33822	4.78084	-0.44262		1459092_at	5.67264e-14	5.55178	5.27257	0.279207		1426645_at	1.63805e-08	7.94417	7.87549	0.0686832
1416226_at	8.85663e-16	7.38981	7.57019	-0.180381		1424564_at	5.85664e-14	8.53869	8.40181	0.136881		1418302_at	1.63862e-08	4.32681	4.34156	-0.0147501
1434923_at	9.16499e-16	8.20155	7.9969	0.204647		1424996_at	5.86559e-14	5.38277	5.44445	-0.0616821		1452373_at	1.65293e-08	14.1136	14.108	0.00557093
1417288_at	9.39768e-16	11.0839	11.1488	-0.0648509		1436447_at	5.88004e-14	6.49663	6.53985	-0.0432118		1432023_a_at	1.66265e-08	6.30708	6.45589	-0.148814
1440921_at	9.48099e-16	2.26211	2.29221	-0.0301006		1428253_at	6.0441e-14	3.6161	3.68292	-0.0668208		1422954_at	1.67859e-08	5.85914	5.99012	-0.130981
1434794_at	9.5518e-16	5.57677	5.53971	0.0370623		1445144_at	6.05716e-14	4.85395	4.97881	-0.124852		1423413_at	1.67954e-08	6.50618	6.59825	-0.0920655
1437188_at	9.76473e-16	6.68386	6.31192	0.371945		1450513_at	6.08049e-14	7.92868	7.46277	0.465913		1425474_a_at	1.68403e-08	9.01489	8.94117	0.0737168
AFFX-GapdhMur/M32599_3_at	1.00577e-15	10.8313	10.9635	-0.132161		1419883_s_at	6.14684e-14	12.14	12.2978	-0.157814		1417935_at	1.6864e-08	8.67829	8.71941	-0.0411126
1460688_s_at	1.00685e-15	6.12017	6.18946	-0.0692889		1455719_at	6.24266e-14	6.07119	5.83162	0.239569		1419255_at	1.71939e-08	3.37741	3.59892	-0.221508
1424574_at	1.03302e-15	10.0928	7.20984	2.88297		1416014_at	6.26128e-14	9.2503	9.143	0.107301		1451383_a_at	1.72164e-08	8.14231	8.39778	-0.255476
1457976_at	1.08251e-15	2.93795	2.97304	-0.0350907		1437152_at	6.26788e-14	9.97886	9.96187	0.0169901		1438214_at	1.72766e-08	8.86129	8.86594	-0.00465561
1459718_x_at	1.0918e-15	6.33577	6.59765	-0.261883		1434025_at	6.27511e-14	7.97387	7.63324	0.340636		1454824_s_at	1.72868e-08	6.60958	6.88414	-0.274557
1440202_at	1.10073e-15	6.03331	6.30699	-0.273678		1423990_at	6.3789e-14	8.35208	7.98687	0.365207		1451123_at	1.72981e-08	10.8604	10.6698	0.190596
1429310_at	1.10197e-15	6.87427	7.84178	-0.967513		AFFX-ThrX-5_at	6.43327e-14	10.8313	11.0172	-0.185838		1439087_a_at	1.74332e-08	5.85057	5.78321	0.0673575
1458587_at	1.11103e-15	7.05852	7.1077	-0.0491823		1452228_at	6.51895e-14	6.93907	6.4864	0.452666		1427998_at	1.74863e-08	7.35936	7.5083	-0.148938
1428166_at	1.1142e-15	6.37056	6.82951	-0.458946		1419537_at	6.55325e-14	6.47152	6.04367	0.427857		1441955_s_at	1.77079e-08	5.93481	5.62593	0.308884
1455418_at	1.13912e-15	8.69745	8.33068	0.366768		1418992_at	6.60436e-14	8.14614	7.90781	0.238329		1446771_at	1.77106e-08	4.08886	4.16197	-0.0731057
1434295_at	1.18775e-15	4.8287	4.92198	-0.0932819		1457022_at	6.67414e-14	5.80963	4.70495	1.10468		1439106_at	1.77198e-08	8.37029	7.51012	0.860165
1433624_at	1.19766e-15	6.36503	6.51204	-0.147007		1429486_at	6.77783e-14	3.90877	3.9978	-0.0890288		1438007_at	1.77365e-08	3.99094	4.06381	-0.0728779
1436979_x_at	1.20042e-15	8.59788	8.46005	0.137832		1420990_at	6.79225e-14	6.70015	6.43972	0.260432		1424842_a_at	1.787e-08	4.77355	4.94209	-0.168536
1444735_at	1.20471e-15	5.89707	5.95314	-0.0560695		1423089_at	6.87777e-14	4.37556	4.45224	-0.0766807		1434025_at	1.81046e-08	7.02482	6.9908	0.0340136
1418025_at	1.23009e-15	7.0281	6.90285	0.125255		1446082_at	6.87993e-14	5.69119	5.61548	0.0757015		1448592_at	1.81108e-08	4.69009	5.65129	-0.961205
1460191_at	1.23942e-15	6.29452	6.28128	0.0132361		1443392_at	6.89124e-14	4.31701	4.84052	-0.523512		1448875_at	1.81198e-08	8.53585	8.58953	-0.0536749
1424573_at	1.24924e-15	7.80863	7.67676	0.131872		1419961_s_at	6.90966e-14	8.62368	8.45711	0.166574		1417268_at	1.82626e-08	7.53645	7.51656	0.0198984
1460564_at	1.24957e-15	6.34163	6.0599	0.281731		1439773_at	6.98919e-14	3.43982	3.62658	-0.186768		1416071_at	1.83339e-08	8.84716	9.146	-0.298845
1455725_a_at	1.24995e-15	11.5267	10.9277	0.598936		1455460_at	7.06205e-14	3.91412	3.53408	0.380038		1417929_at	1.84595e-08	5.36262	5.42556	-0.062938
1439740_s_at	1.26336e-15	2.99789	2.97396	0.0239349		1433668_at	7.08402e-14	6.33122	6.11477	0.216443		1451724_at	1.85216e-08	6.4262	6.41941	0.00678919
1426369_at	1.26958e-15	8.70901	8.20544	0.503579		1424779_at	7.09061e-14	7.70438	7.4553	0.249078		1422784_at	1.85838e-08	5.39031	5.44845	-0.0581368
1423904_a_at	1.27007e-15	9.43697	9.34115	0.0958222		1432078_at	7.11185e-14	4.46907	4.3007	0.168371		1449164_at	1.87453e-08	3.69997	3.80608	-0.106108
1434048_at	1.2767e-15	7.02478	6.99039	0.034394		1426359_at	7.16626e-14	7.29394	7.06071	0.233231		1454827_at	1.87554e-08	6.66007	7.0611	-0.401033
1426501_a_at	1.29187e-15	4.07805	4.29407	-0.216023		1451349_at	7.19271e-14	10.1652	10.2429	-0.0777079		1416010_a_at	1.88766e-08	11.2339	11.7622	-0.528275
1421844_at	1.29599e-15	8.69431	8.46363	0.23068		1458425_at	7.24906e-14	4.15992	4.12573	0.0341863		1417559_at	1.90284e-08	3.51994	3.57094	-0.0509927
1450339_a_at	1.31781e-15	3.8699	3.95852	-0.0886203		1444815_at	7.26232e-14	5.10181	4.97082	0.130996		1451545_at	1.90818e-08	7.37296	7.38142	-0.00846514
1417235_at	1.33738e-15	9.22193	9.02014	0.201783		1437466_at	7.27385e-14	7.02952	7.11203	-0.0825111		1424615_at	1.92671e-08	2.99022	3.00549	-0.0152708
1440760_at	1.35148e-15	3.13915	3.20018	-0.0610365		1431571_at	7.30625e-14	5.16648	5.23563	-0.0691475		1441661_at	1.97025e-08	6.00254	5.99569	0.00684966
1425747_at	1.36489e-15	9.99693	9.87858	0.118348		1446538_at	7.32657e-14	5.71282	5.91175	-0.198927		1451830_a_at	1.97332e-08	10.4737	10.3419	0.131737
1417933_at	1.37103e-15	7.27453	7.4191	-0.144563		1440891_at	7.34641e-14	5.50441	5.24724	0.25717		1428557_a_at	1.98329e-08	6.46074	6.91853	-0.457785
AFFX-GapdhMur/M32599_M_at	1.38724e-15	10.3465	10.4864	-0.139897		1436797_a_at	7.35515e-14	4.00613	3.81215	0.193981		1459621_at	1.99113e-08	8.52942	8.65335	-0.12393
1438195_at	1.42437e-15	3.78819	3.81885	-0.0306639		1432838_at	7.41061e-14	3.8375	3.88642	-0.0489129		1433486_at	2.01009e-08	5.21668	5.05059	0.166085
1456446_at	1.43428e-15	6.28066	6.38837	-0.107715		1450346_at	7.42015e-14	4.26327	4.39067	-0.127398		1422504_at	2.01349e-08	7.01455	7.13326	-0.118708
1452205_x_at	1.46308e-15	6.36754	6.77674	-0.409195		1453993_a_at	7.47807e-14	4.38749	4.58023	-0.192732		1456777_at	2.01536e-08	5.23424	5.31397	-0.0797244
1424356_a_at	1.47831e-15	7.36669	7.5525	-0.185817		1450399_at	7.5192e-14	11.4352	10.9039	0.531322		1427767_a_at	2.02469e-08	4.75038	4.98528	-0.234901
1460227_at	1.48684e-15	6.82516	6.73685	0.0883063		1441962_at	7.56315e-14	2.58412	2.52753	0.056591		1452429_s_at	2.03055e-08	7.70142	6.81215	0.889271
1427007_at	1.50506e-15	8.74392	8.78186	-0.0379374		1420650_at	7.58963e-14	6.25196	6.27618	-0.0242217		1415997_at	2.05628e-08	14.2057	14.1482	0.0574446
1424564_at	1.51504e-15	7.03882	7.32441	-0.285586		1452395_at	7.60465e-14	3.88312	3.98587	-0.102751		1431645_a_at	2.07504e-08	7.2461	7.16475	0.0813469
1419406_a_at	1.53801e-15	8.45094	8.85937	-0.408429		1418175_at	7.64951e-14	5.58931	5.02275	0.566559		1434307_at	2.07742e-08	7.20253	7.03944	0.163093
1444855_at	1.54378e-15	4.38497	4.46366	-0.078691		1441787_at	7.70008e-14	7.14582	5.9315	1.21433		1450154_at	2.08592e-08	4.37621	4.76713	-0.390915
1448605_at	1.54987e-15	5.27122	5.30095	-0.0297357		1431064_at	7.70124e-14	5.26835	5.28423	-0.0158708		1425761_a_at	2.08681e-08	7.00008	7.05399	-0.0539156
1440226_at	1.55423e-15	2.96605	2.97196	-0.00591221		1459926_at	7.99278e-14	6.80515	6.47343	0.331714		1434766_at	2.08914e-08	3.72795	3.62404	0.10391
1448562_at	1.60117e-15	3.81869	4.09893	-0.280238		1452660_s_at	8.14691e-14	2.97877	3.33022	-0.351445		1430579_at	2.1037e-08	13.6629	13.5758	0.0871719
1417457_at	1.62802e-15	6.18864	6.16061	0.0280311		1421968_a_at	8.16544e-14	6.41258	6.3669	0.0456779		1420520_x_at	2.10793e-08	8.18314	8.39026	-0.207122
1417588_at	1.65739e-15	11.0501	10.832	0.218013		1441202_at	8.18607e-14	3.44392	3.57293	-0.129009		1416226_at	2.10848e-08	4.06643	4.17385	-0.10742
1449164_at	1.72877e-15	4.83679	4.90761	-0.0708214		1435308_at	8.23777e-14	6.58011	5.92807	0.652039		1429826_at	2.13543e-08	6.44007	6.20621	0.233864
1455259_a_at	1.74746e-15	9.4638	9.30388	0.15992		1445476_at	8.25709e-14	4.81791	4.59709	0.220822		1425764_a_at	2.1367e-08	3.43283	3.36304	0.0697874
1457072_at	1.75623e-15	3.68837	3.69041	-0.0020328		1424780_a_at	8.28531e-14	7.19074	6.95484	0.235898		1449069_at	2.1408e-08	7.32651	7.45842	-0.131906
1427384_at	1.7778e-15	8.84582	9.45437	-0.608547		1427479_at	8.34626e-14	7.9967	7.77966	0.217039		1428678_s_at	2.14654e-08	9.63906	9.31351	0.325543
1451910_a_at	1.80576e-15	6.46253	6.39008	0.0724475		1459955_at	8.37058e-14	5.85433	5.75622	0.0981174		1457035_at	2.1467e-08	6.76062	6.82751	-0.0668893
1426316_at	1.80745e-15	6.90593	6.67201	0.233925		1428663_at	8.38665e-14	5.91927	6.00013	-0.080858		1418163_at	2.16712e-08	2.7266	2.76521	-0.0386079
1419737_a_at	1.83532e-15	7.55666	7.7727	-0.21604		1453825_at	8.38791e-14	8.26615	7.77128	0.49487		1418177_at	2.16754e-08	5.89408	5.75056	0.143518
1417859_at	1.89562e-15	2.54737	2.55329	-0.00592094		1436986_at	8.39089e-14	4.41228	4.56832	-0.156045		1438767_at	2.17048e-08	7.67482	7.57034	0.104484
1436507_at	1.9158e-15	3.22058	3.31287	-0.0922916		1424610_at	8.4468e-14	4.9403	4.88494	0.0553632		1424288_at	2.172e-08	4.95138	4.9079	0.0434803
1454831_at	1.9407e-15	6.18507	6.03999	0.145078		1455170_at	8.52203e-14	6.24563	6.10428	0.141353		1442051_at	2.21304e-08	6.79443	6.62301	0.171418
1422465_a_at	1.97128e-15	8.8438	8.71383	0.129972		1426972_at	8.53136e-14	6.10662	6.10314	0.00347941		1435146_s_at	2.22271e-08	4.82856	4.99688	-0.168324
1439799_at	1.99178e-15	3.81925	3.82977	-0.0105192		1416082_at	8.62305e-14	7.75029	7.46442	0.285869		1427982_s_at	2.25998e-08	5.69058	5.80582	-0.115236
1435149_at	2.02247e-15	10.1585	5.85287	4.30567		1418641_at	8.6403e-14	3.00928	3.07446	-0.0651844		1418809_at	2.26187e-08	9.27669	9.4809	-0.204211
1440304_at	2.04515e-15	4.38456	4.46205	-0.0774839		1436877_at	8.69123e-14	7.11503	6.81845	0.296585		1435899_at	2.31259e-08	6.45982	6.53301	-0.0731838
1459764_x_at	2.06843e-15	8.09954	8.25725	-0.157705		1429413_at	8.79677e-14	3.71666	3.66225	0.0544111		1452660_s_at	2.31551e-08	7.56218	7.20602	0.356161
1458419_at	2.07838e-15	3.43982	3.54381	-0.103993		1447735_x_at	8.81033e-14	6.13047	6.20048	-0.0700086		1416982_at	2.32342e-08	7.46442	7.66332	-0.198899
1417935_at	2.15515e-15	13.5537	13.5708	-0.017139		1416108_a_at	8.86037e-14	10.9204	11.1703	-0.249892		1427663_a_at	2.32636e-08	6.36965	6.55576	-0.186109
1424645_at	2.18291e-15	5.08689	4.91655	0.170333		1446396_at	8.88008e-14	5.1109	4.82408	0.286821		1435176_a_at	2.33268e-08	4.5541	4.368	0.186094
1422105_at	2.21199e-15	8.77108	8.83247	-0.0613876		1448026_at	8.89025e-14	9.43601	9.0124	0.423614		1419727_at	2.33871e-08	7.40201	7.48767	-0.0856638
1419307_at	2.31748e-15	12.0952	12.0409	0.0542408		1417074_at	8.93339e-14	8.13565	7.88169	0.253959		1447613_at	2.34515e-08	7.95698	8.04627	-0.0892964
1428468_at	2.34884e-15	5.0711	5.07795	-0.00684703		1440850_at	9.03286e-14	10.7989	11.3629	-0.563963		1423414_at	2.36185e-08	7.10751	8.2307	-1.12319
1454896_at	2.44236e-15	6.05243	6.23061	-0.178188		1438330_at	9.10929e-14	6.23233	5.88305	0.349283		1428851_at	2.37329e-08	6.98652	6.82561	0.160908
1435476_a_at	2.45073e-15	5.86934	5.85968	0.00966377		1421110_at	9.12827e-14	8.76296	8.34361	0.419348		1426620_at	2.38663e-08	4.58682	5.09949	-0.512666
1419665_a_at	2.47574e-15	7.38226	7.15164	0.230618		1415963_at	9.14466e-14	8.3594	8.31745	0.0419569		1423174_a_at	2.42485e-08	6.20354	6.28056	-0.0770188
1420382_at	2.48057e-15	6.11139	6.04369	0.0676959		1435433_at	9.38014e-14	3.67768	3.76323	-0.085551		1440894_at	2.43188e-08	11.2473	11.687	-0.439669
1427171_at	2.50954e-15	3.18649	3.24608	-0.0595861		1426918_at	9.49861e-14	2.61397	2.46594	0.148025		1429959_at	2.44002e-08	5.93502	5.82865	0.106369
1449838_at	2.53171e-15	5.4338	5.22845	0.205352		1438553_x_at	9.52345e-14	4.16757	4.2371	-0.0695312		1418711_at	2.45034e-08	12.8117	12.9595	-0.14785
1422760_at	2.5407e-15	4.30982	4.43762	-0.127802		1416934_at	9.56711e-14	3.53376	3.77612	-0.24237		1415708_at	2.46099e-08	7.80275	7.86485	-0.0620971
1449098_a_at	2.54352e-15	4.03176	4.04698	-0.0152174		1459038_at	9.58103e-14	8.65969	8.34523	0.314464		1442080_at	2.47952e-08	6.50533	6.7081	-0.202764
1437507_at	2.56173e-15	3.78495	3.92052	-0.135569		1428750_at	9.76678e-14	5.23711	5.19227	0.0448408		1418133_at	2.49075e-08	10.0646	10.1312	-0.0666075
1425628_a_at	2.60289e-15	7.77477	7.70541	0.0693618		1453283_at	9.8614e-14	3.67753	3.67409	0.00343369		1450446_a_at	2.54294e-08	7.02101	7.03618	-0.0151642
1452699_at	2.61509e-15	7.149	7.05118	0.0978196		1420641_a_at	9.88371e-14	8.1226	7.97728	0.145323		1436502_at	2.5885e-08	6.92112	7.12037	-0.19925
1452483_a_at	2.64118e-15	11.0671	11.2901	-0.222946		1437870_at	9.91988e-14	3.29471	3.32914	-0.0344288		1427656_at	2.59276e-08	7.9761	8.40027	-0.424175
1436918_at	2.66726e-15	3.61136	3.49966	0.111699		1431954_x_at	1.00145e-13	3.43969	3.46467	-0.0249825		1426525_at	2.60452e-08	5.13576	5.12771	0.00805616
1436710_at	2.67336e-15	5.54648	5.59013	-0.0436481		1452383_at	1.01242e-13	6.44326	6.48872	-0.0454606		1428301_at	2.61219e-08	8.92154	8.94155	-0.0200178
1428875_at	2.68068e-15	6.55623	6.48342	0.0728064		1425289_a_at	1.01437e-13	4.87748	4.49636	0.381119		1427342_at	2.62253e-08	10.7797	11.2972	-0.517502
1415829_at	2.72908e-15	8.8398	9.146	-0.306202		1447097_at	1.01676e-13	6.37425	6.88736	-0.51311		1420369_a_at	2.62288e-08	10.075	9.87913	0.195877
1417573_at	2.74132e-15	8.41907	8.25541	0.163655		1427034_at	1.01977e-13	5.58059	5.40531	0.175275		1427177_at	2.66006e-08	8.90635	8.39901	0.50734
1424655_at	2.85121e-15	8.90885	8.49554	0.413306		1455384_x_at	1.02081e-13	8.32553	8.19734	0.128191		1435931_at	2.67166e-08	6.21985	6.34592	-0.126063
1428767_at	2.87742e-15	5.00516	4.93372	0.0714418		1455773_at	1.03163e-13	3.97584	3.86216	0.113675		1429045_at	2.68014e-08	7.04042	7.13642	-0.0960041
1457675_at	2.9176e-15	5.78956	6.74052	-0.95096		1430980_a_at	1.03546e-13	7.13662	6.61159	0.525037		1439253_x_at	2.68423e-08	7.43978	7.82735	-0.387578
1441843_s_at	2.99567e-15	3.27677	3.31354	-0.0367646		1445993_at	1.0377e-13	7.51295	7.14933	0.36362		1445629_at	2.6883e-08	3.07854	3.07276	0.00578029
1425225_at	3.03006e-15	6.78627	6.61312	0.173158		1458319_at	1.04653e-13	6.71317	6.39846	0.314709		1434617_x_at	2.71017e-08	7.47348	7.59365	-0.120169
1425025_at	3.09059e-15	5.44009	5.01853	0.421559		1456825_at	1.0508e-13	4.94231	4.64065	0.301658		1445671_at	2.71249e-08	5.66109	5.93899	-0.277907
1449508_at	3.17107e-15	6.54795	6.85083	-0.30288		1430704_at	1.07947e-13	5.114	4.97272	0.141277		1423112_at	2.73195e-08	3.98721	4.26564	-0.278435
1426390_a_at	3.21683e-15	3.9395	3.97104	-0.0315391		1421281_at	1.09933e-13	4.27196	4.25097	0.0209891		1453760_at	2.7362e-08	4.81849	4.78091	0.0375822
1450858_a_at	3.22331e-15	6.14884	6.21559	-0.0667522		1433567_at	1.10361e-13	3.9131	3.91883	-0.0057253		1425412_at	2.75145e-08	8.04888	8.39845	-0.349563
1430289_a_at	3.24844e-15	10.3839	9.87435	0.509561		1429737_a_at	1.11075e-13	10.0871	8.89611	1.19095		1438303_at	2.76602e-08	4.56081	4.49281	0.068003
1435542_s_at	3.26629e-15	7.37567	7.80904	-0.433367		1422736_at	1.12334e-13	8.45533	8.02434	0.430982		1455973_at	2.76659e-08	5.78167	5.86345	-0.0817862
1441079_at	3.30752e-15	7.06905	7.11095	-0.041894		1438044_at	1.14303e-13	5.70254	5.75518	-0.0526437		1422551_at	2.77073e-08	4.24665	4.41688	-0.170231
1446715_at	3.44737e-15	4.99298	5.10081	-0.107829		1419610_at	1.15011e-13	10.6847	10.4713	0.213445		1458759_at	2.79267e-08	4.93245	4.94969	-0.0172373
1423720_a_at	3.48269e-15	5.10292	5.21554	-0.112623		1428719_at	1.1678e-13	4.0272	3.95405	0.0731588		1454603_a_at	2.80134e-08	5.96346	6.13818	-0.17472
1441977_at	3.49552e-15	3.92228	4.01297	-0.0906931		1432644_at	1.16787e-13	7.79862	7.28963	0.508985		1433908_a_at	2.82955e-08	10.1591	10.2042	-0.0450994
1454711_at	3.5149e-15	5.98655	5.65066	0.335886		1419355_at	1.17642e-13	8.27978	8.13886	0.140923		1425309_at	2.85084e-08	6.03586	6.07849	-0.0426326
1439293_at	3.5327e-15	7.24657	7.19865	0.0479161		1451796_s_at	1.17871e-13	7.18529	6.94079	0.244504		1425829_a_at	2.85979e-08	8.10923	8.87381	-0.764575
1436925_at	3.54308e-15	3.40811	3.46164	-0.053535		1418033_s_at	1.18903e-13	9.00391	7.72007	1.28383		1424420_at	2.88086e-08	5.5043	5.51115	-0.00684038
1422957_at	3.65374e-15	7.67845	7.58549	0.0929601		1457153_at	1.19749e-13	5.78969	5.66574	0.123944		1434070_at	2.88243e-08	7.17094	7.4254	-0.254451
1447918_x_at	3.65852e-15	4.80671	4.83818	-0.0314709		1458543_at	1.21664e-13	5.44093	5.62416	-0.183222		1421291_at	2.88346e-08	5.47472	5.71229	-0.237571
1438907_at	3.74913e-15	4.17622	4.2383	-0.0620714		1444429_at	1.23678e-13	5.31986	5.24391	0.0759499		1422668_at	2.89312e-08	5.26166	5.98181	-0.72015
1428759_s_at	3.76516e-15	10.0835	10.206	-0.122541		1415868_at	1.24167e-13	13.5516	13.3478	0.203776		1433227_at	2.8984e-08	10.2339	10.5025	-0.268644
1460567_at	3.7829e-15	4.71473	4.75702	-0.0422934		1458351_s_at	1.251e-13	8.27383	8.35005	-0.0762138		1424668_a_at	2.90954e-08	7.07623	7.12787	-0.05164
1416234_at	3.79345e-15	8.29209	7.93167	0.360417		1440831_at	1.26712e-13	5.87211	5.59409	0.278017		1434124_x_at	2.91126e-08	2.50184	2.49001	0.0118257
1424654_at	3.7989e-15	6.16535	6.20068	-0.0353259		1419829_a_at	1.26851e-13	7.58432	7.58697	-0.00265617		1450308_a_at	2.91175e-08	11.3803	11.3041	0.0762113
1423588_at	3.79999e-15	8.21381	7.97393	0.239877		1434222_at	1.26908e-13	5.04759	5.01757	0.0300201		1425480_at	2.91783e-08	9.65087	9.58332	0.0675563
1453378_at	3.817e-15	3.2208	3.2263	-0.00550117		1418974_at	1.27779e-13	5.97928	6.36934	-0.390057		1427630_x_at	2.93087e-08	10.6685	10.656	0.0125386
1427108_at	3.9431e-15	2.66942	2.70558	-0.0361654		1447560_at	1.28355e-13	6.79716	6.46193	0.335223		1455207_at	2.94215e-08	6.91566	7.0107	-0.0950434
1419508_at	3.99083e-15	10.8936	10.9014	-0.00784353		1460331_at	1.28524e-13	4.743	4.75326	-0.0102636		1429463_at	2.9467e-08	7.6062	7.5584	0.0478027
1428610_at	4.05903e-15	5.09728	4.98792	0.109357		1450822_at	1.29287e-13	5.78956	5.32114	0.468414		1443161_at	2.96303e-08	5.58126	5.61833	-0.0370691
1417612_at	4.07782e-15	7.7544	7.22772	0.526677		1424990_at	1.29854e-13	8.1411	7.02711	1.11399		1460225_at	2.97649e-08	8.40181	8.26611	0.135694
1441322_at	4.10924e-15	6.70491	6.55648	0.148424		1456599_at	1.31784e-13	6.00295	6.24673	-0.243772		1418085_at	2.9885e-08	7.05964	6.70109	0.358553
1417357_at	4.14086e-15	5.04759	4.77218	0.275407		1450459_at	1.32709e-13	5.34348	5.36292	-0.0194438		1419833_s_at	3.01278e-08	11.5283	10.8671	0.66113
1446245_at	4.1602e-15	9.89204	9.39743	0.494605		1423588_at	1.3475e-13	5.98512	6.14539	-0.160276		1418860_a_at	3.02856e-08	9.90947	9.88972	0.0197465
1450982_at	4.16438e-15	11.827	12.3241	-0.497164		1418355_at	1.34807e-13	7.2346	7.01455	0.220048		1419584_at	3.03621e-08	5.70916	6.02705	-0.317892
1459901_at	4.21846e-15	7.25822	7.44896	-0.190735		1420226_x_at	1.34881e-13	5.05601	5.13576	-0.0797529		1452112_a_at	3.08615e-08	6.47011	7.0742	-0.60409
1435242_at	4.24472e-15	9.62024	9.56035	0.0598866		1437245_at	1.35434e-13	7.6901	7.09831	0.591795		1440084_at	3.09578e-08	5.14549	4.98908	0.156413
1421027_a_at	4.28542e-15	8.03703	8.43177	-0.394736		1456115_at	1.36466e-13	6.1971	6.1064	0.0906916		1421998_at	3.1039e-08	8.22922	8.3459	-0.11668
1426297_at	4.31197e-15	4.67118	4.77163	-0.100451		1458207_at	1.36991e-13	7.83666	7.76123	0.0754225		1450214_at	3.11674e-08	5.55586	5.62315	-0.0672862
1454042_a_at	4.3333e-15	4.8546	4.69265	0.161947		1433864_at	1.37105e-13	4.17208	4.74779	-0.575716		1423392_at	3.14146e-08	4.71186	4.80138	-0.0895154
1436184_at	4.36706e-15	6.49789	6.52234	-0.024455		1416529_at	1.37981e-13	10.5007	10.1697	0.331051		1452430_s_at	3.1838e-08	8.38184	8.80008	-0.418245
1456914_at	4.60198e-15	10.4982	10.9344	-0.436232		1426377_at	1.38256e-13	7.90421	7.9693	-0.0650901		1439729_at	3.18695e-08	5.34613	5.4152	-0.0690756
1416046_a_at	4.61434e-15	10.1888	9.97256	0.216275		1443373_at	1.38515e-13	2.80151	2.80613	-0.00461846		1418907_at	3.21655e-08	4.17146	4.20056	-0.0290919
1439136_at	4.63367e-15	6.56082	6.3787	0.182125		1458583_at	1.39092e-13	6.57167	6.53301	0.0386616		1434960_at	3.22013e-08	5.98524	5.95553	0.0297039
1455680_at	4.68599e-15	8.0141	8.34979	-0.335696		1421366_at	1.40175e-13	8.84294	8.58864	0.254297		1452408_at	3.23153e-08	5.50718	5.29699	0.210194
1422327_s_at	4.89194e-15	5.38417	5.20501	0.179163		1419098_at	1.40195e-13	7.55308	7.35971	0.193377		1416646_at	3.23261e-08	7.69016	8.05416	-0.363996
1438116_x_at	4.93215e-15	3.50245	3.55882	-0.0563692		1421017_at	1.40336e-13	5.22954	5.09322	0.136324		1436202_at	3.25335e-08	3.11903	2.97408	0.144946
1428492_at	4.93484e-15	5.3397	5.18244	0.157261		1421168_at	1.40422e-13	4.94683	5.31496	-0.368129		1435530_at	3.26903e-08	10.4749	10.7	-0.225146
1417903_at	4.99856e-15	9.34189	9.02909	0.312795		1441799_at	1.4079e-13	4.74915	4.25321	0.495941		1434335_at	3.27882e-08	9.02531	9.19965	-0.174343
1435975_at	5.01236e-15	3.78576	3.83998	-0.0542186		1442231_at	1.4242e-13	6.02411	6.04025	-0.0161409		1420010_at	3.28987e-08	10.1718	10.1287	0.0430991
1435263_at	5.10435e-15	3.48821	3.47269	0.015524		1436641_at	1.42675e-13	3.16914	3.14937	0.0197782		1437378_x_at	3.34581e-08	4.7221	4.97937	-0.257271
1436447_at	5.10456e-15	3.6731	3.68866	-0.0155536		1456752_at	1.44741e-13	8.03647	7.74726	0.289207		1451065_a_at	3.35804e-08	3.90349	3.99277	-0.0892795
1438176_x_at	5.11008e-15	5.44172	5.05794	0.38378		1425665_a_at	1.44891e-13	7.63412	7.49159	0.142537		1455087_at	3.35851e-08	4.40641	4.39894	0.00747194
1431774_a_at	5.12454e-15	9.4999	9.79206	-0.292163		1444347_at	1.45421e-13	10.7709	10.8247	-0.05381		1457302_at	3.35938e-08	7.06189	7.50291	-0.441023
1417478_a_at	5.15576e-15	12.3882	12.5505	-0.162331		1422857_at	1.46117e-13	5.43528	5.48938	-0.0540971		1423212_at	3.37465e-08	6.06559	6.55949	-0.493904
1458299_s_at	5.19895e-15	3.01263	3.08478	-0.0721505		1428668_at	1.46517e-13	4.1176	4.09825	0.0193527		1437231_at	3.38304e-08	5.37064	5.68977	-0.319124
1458218_s_at	5.29287e-15	7.03872	7.17729	-0.138571		1448763_at	1.47701e-13	6.31814	5.47612	0.842023		1416743_at	3.38345e-08	8.14642	8.15303	-0.00661226
1438147_at	5.45954e-15	2.89477	2.92537	-0.0306022		1416912_at	1.49933e-13	4.77815	4.33	0.448144		1424455_at	3.39164e-08	7.3745	7.50973	-0.13523
1436501_at	5.48571e-15	2.80942	2.81835	-0.00893131		1448674_at	1.53058e-13	5.6171	5.66803	-0.0509337		1455747_at	3.40647e-08	4.23392	4.34562	-0.111695
1458148_at	5.56039e-15	4.02716	4.07787	-0.050718		1421889_a_at	1.54536e-13	9.32956	9.48085	-0.151292		1419650_at	3.42261e-08	7.92849	8.04734	-0.118845
1458364_s_at	5.65728e-15	4.31809	3.9268	0.391294		1418973_at	1.56271e-13	8.30026	8.18642	0.113843		1447329_at	3.44376e-08	6.13786	6.43211	-0.294251
1443136_at	5.74757e-15	4.27578	4.35763	-0.0818452		1441571_at	1.56638e-13	5.68601	5.41304	0.272976		1442588_at	3.44523e-08	6.98498	6.93342	0.0515602
1434086_at	5.76748e-15	5.34526	4.68625	0.659014		1419413_at	1.56868e-13	6.65643	6.61581	0.040615		1454938_at	3.44563e-08	5.40584	5.43434	-0.0285028
1428720_s_at	5.83156e-15	9.91508	9.96686	-0.0517733		1433133_at	1.58014e-13	9.60754	9.32536	0.282177		1439063_at	3.4591e-08	6.75197	6.76627	-0.0142966
1422572_at	5.83652e-15	8.33885	8.62715	-0.288298		1445994_at	1.58049e-13	2.80267	2.82015	-0.0174783		1416379_at	3.46286e-08	8.22547	8.21861	0.00686662
1438931_s_at	5.8452e-15	7.47662	7.35171	0.124903		1451275_at	1.59704e-13	4.92737	4.93692	-0.00955377		1424432_at	3.48183e-08	8.22686	8.402	-0.175135
1449858_at	5.97605e-15	4.35639	4.38239	-0.0259949		1433065_at	1.60569e-13	6.17691	6.2583	-0.081396		1456333_a_at	3.50512e-08	7.09722	7.70866	-0.611434
1450943_at	6.15941e-15	12.7316	13.108	-0.376455		1417741_at	1.61457e-13	10.705	10.8607	-0.155675		1436326_at	3.52067e-08	7.09664	7.84273	-0.746094
1436680_s_at	6.18384e-15	9.07636	8.9882	0.0881632		1438517_at	1.65856e-13	4.71212	4.64469	0.0674298		1423966_at	3.52106e-08	6.11281	6.08514	0.0276708
1415751_at	6.19537e-15	2.86729	2.86468	0.00261009		1421529_a_at	1.67963e-13	8.35183	8.3521	-0.000265064		1416165_at	3.53731e-08	11.6957	11.4517	0.243935
1438392_at	6.26239e-15	3.90877	4.14444	-0.235664		1422553_at	1.69088e-13	5.2226	4.95181	0.270791		1419586_at	3.54041e-08	6.76226	7.11745	-0.355185
1435449_at	6.33674e-15	7.03029	7.46646	-0.436178		1432432_a_at	1.69598e-13	8.53199	8.26429	0.267699		1436847_s_at	3.54492e-08	4.48284	4.39719	0.085654
1457039_at	6.50292e-15	5.79025	5.94981	-0.159558		1442322_at	1.6988e-13	5.32836	5.42438	-0.0960162		1441088_at	3.58205e-08	12.3235	12.3483	-0.024805
1419069_at	6.50964e-15	5.62834	5.82231	-0.193976		1418648_at	1.7083e-13	6.56899	6.49393	0.0750602		1425956_a_at	3.58297e-08	12.0269	11.7628	0.264194
1419413_at	6.7055e-15	6.09446	5.96941	0.125055		1437524_x_at	1.72455e-13	6.42488	6.31583	0.109047		1434880_at	3.60306e-08	6.29297	6.63837	-0.345406
1426912_at	6.70941e-15	7.27846	7.21532	0.0631476		1441535_at	1.73632e-13	5.37871	5.39058	-0.0118666		1428626_at	3.61828e-08	7.62871	7.72485	-0.0961337
1445665_at	6.89354e-15	6.20601	6.02785	0.178164		1428740_a_at	1.74274e-13	4.75926	4.70524	0.0540265		1419032_at	3.62438e-08	7.24815	7.29844	-0.0502887
1426940_at	6.91108e-15	6.68893	6.60241	0.0865233		1431789_s_at	1.75285e-13	2.52253	2.55487	-0.0323449		1451990_at	3.64644e-08	4.59241	4.72648	-0.13407
1442266_at	7.07667e-15	5.27294	5.37116	-0.0982156		1456684_at	1.76005e-13	6.991	6.80482	0.186182		1454200_at	3.64835e-08	6.43874	6.57047	-0.131732
1435264_at	7.23142e-15	8.00497	6.65603	1.34894		1420621_a_at	1.76648e-13	5.45738	5.8705	-0.413126		1416981_at	3.67247e-08	6.03607	5.9912	0.0448687
1443534_at	7.47275e-15	10.6448	10.6554	-0.0106337		1459892_at	1.7694e-13	4.79366	4.71447	0.0791931		1422901_at	3.68162e-08	8.74389	8.70012	0.0437623
1451439_at	7.48199e-15	12.4697	7.55758	4.91214		1448364_at	1.78012e-13	6.71981	6.63804	0.0817713		1427665_a_at	3.68947e-08	6.17351	6.37999	-0.206477
1441589_at	7.6154e-15	2.30151	2.30704	-0.0055303		1420697_at	1.78113e-13	4.01268	4.10274	-0.0900611		1418468_at	3.72406e-08	9.60734	9.64776	-0.0404163
1427145_at	7.62289e-15	7.67282	7.97987	-0.307046		1437113_s_at	1.80631e-13	8.32102	8.00386	0.317159		1423521_at	3.75203e-08	2.98111	3.11257	-0.131465
1451160_s_at	7.76194e-15	4.50515	4.85076	-0.345613		1429503_at	1.81494e-13	8.53574	8.54972	-0.0139727		1421410_a_at	3.76232e-08	8.12991	8.31651	-0.186598
1454708_at	7.89023e-15	8.24524	7.75682	0.488418		1425502_x_at	1.82061e-13	6.17327	6.14388	0.0293949		1448993_at	3.76551e-08	6.35916	6.03124	0.327924
1422166_at	7.94967e-15	8.06237	7.59118	0.471194		1460186_at	1.83001e-13	5.73587	5.32469	0.411186		1418295_s_at	3.76702e-08	2.87429	2.80691	0.0673874
1435325_at	7.97935e-15	6.07955	5.64716	0.432382		1452755_at	1.84709e-13	5.12666	5.19349	-0.0668265		1425465_a_at	3.79261e-08	10.4713	9.6975	0.773772
1422567_at	8.0172e-15	7.17973	6.9908	0.188931		1427510_at	1.84908e-13	6.00536	5.99451	0.0108461		1455590_at	3.79733e-08	6.79249	7.26486	-0.472372
1449659_s_at	8.19273e-15	13.2423	13.5753	-0.333022		AFFX-r2-Bs-thr-5_s_at	1.85819e-13	11.0287	10.7781	0.250579		1428080_at	3.80018e-08	9.55775	9.27449	0.283262
1455051_at	8.2948e-15	9.44221	9.6745	-0.232289		1415995_at	1.86575e-13	9.32394	9.17218	0.151756		1457703_at	3.81278e-08	10.3233	10.3318	-0.00842982
1456433_at	8.29582e-15	4.4784	4.2882	0.1902		1426786_s_at	1.87309e-13	8.58337	8.0897	0.493665		1425287_at	3.81523e-08	6.04367	6.44983	-0.406162
1455000_at	8.34906e-15	7.96758	7.23439	0.733187		1428087_at	1.88571e-13	5.25022	5.36164	-0.111418		1427166_a_at	3.816e-08	7.12976	7.39101	-0.261253
1452119_at	8.44266e-15	6.97269	6.69744	0.275251		1449951_at	1.88782e-13	3.73604	3.65661	0.0794292		1422024_at	3.82486e-08	5.99328	6.14139	-0.148109
1438553_x_at	8.45296e-15	8.46758	8.53675	-0.0691641		1424484_at	1.8891e-13	4.21672	4.12701	0.0897117		1449341_a_at	3.83106e-08	6.98236	7.42987	-0.447508
1422027_a_at	8.53693e-15	3.30081	3.34989	-0.0490849		1428858_at	1.90073e-13	5.43631	5.59465	-0.158342		1456381_x_at	3.89942e-08	11.0661	8.83114	2.23498
1454887_at	8.93186e-15	6.18326	6.68539	-0.502131		1434310_at	1.90392e-13	9.14288	9.23941	-0.0965256		1416704_at	3.92603e-08	8.72017	9.10174	-0.381571
1437615_s_at	8.97409e-15	4.02311	4.14478	-0.121664		1459408_at	1.91027e-13	5.63758	5.22415	0.413436		1445217_at	3.92634e-08	5.67284	5.74929	-0.0764513
1455133_s_at	9.01008e-15	5.0149	5.14133	-0.126429		1444707_at	1.93116e-13	3.60342	3.82031	-0.216889		1451095_at	3.94123e-08	4.64377	4.91655	-0.272779
1427040_at	9.0305e-15	10.5185	10.6143	-0.0958477		1446854_at	1.93785e-13	6.34474	6.50477	-0.160031		1460443_at	3.95577e-08	6.09148	6.07801	0.0134681
1436666_at	9.11069e-15	4.11047	4.13927	-0.0288031		1460209_at	1.94179e-13	5.52949	5.56425	-0.0347537		1416007_at	3.96527e-08	8.90512	10.4571	-1.55196
1426158_at	9.17058e-15	7.72682	7.82725	-0.100435		1437421_at	1.94336e-13	9.81969	9.89081	-0.0711192		1434754_at	3.96902e-08	5.95169	6.06639	-0.114699
1452321_at	9.43262e-15	9.99261	10.4378	-0.445222		1442994_at	1.96018e-13	5.65912	5.75429	-0.0951757		1435328_at	3.97835e-08	9.52526	9.93344	-0.40818
1451426_at	9.50234e-15	7.89077	7.59392	0.296844		1438663_at	1.96495e-13	5.58999	5.48279	0.107204		1439766_x_at	3.9798e-08	9.92273	9.87435	0.0483872
1452319_at	9.62408e-15	6.64418	6.95931	-0.315126		1431480_at	1.96906e-13	5.72239	5.74763	-0.0252372		1450939_at	3.995e-08	7.59846	7.67676	-0.078302
1428853_at	9.65415e-15	6.59658	6.50981	0.0867783		1436720_s_at	1.97131e-13	5.01828	4.98837	0.0299116		1417336_a_at	3.99769e-08	10.494	10.3837	0.110311
1419067_a_at	9.79687e-15	7.31008	7.36851	-0.0584251		1443437_at	1.97565e-13	4.00698	4.01435	-0.00737361		1442990_at	4.00505e-08	7.49471	7.54524	-0.0505314
1456648_at	9.80968e-15	5.6907	5.76062	-0.0699202		1459882_at	1.97966e-13	6.66259	6.68433	-0.0217363		1440862_at	4.0221e-08	4.61731	4.70069	-0.0833746
1422491_a_at	9.91593e-15	4.66193	4.58238	0.079546		1452066_a_at	1.98574e-13	8.31004	8.47941	-0.169365		1451748_a_at	4.02941e-08	8.07437	7.94084	0.133532
1426958_at	9.92766e-15	7.21678	7.4256	-0.208824		1445141_at	1.98917e-13	7.22348	6.94038	0.283099		1428081_at	4.08649e-08	5.91077	5.81221	0.0985606
1449265_at	1.01692e-14	7.60758	7.20538	0.402209		1452122_at	1.99182e-13	6.88051	6.70199	0.17852		1420901_a_at	4.1069e-08	7.05835	7.2632	-0.204847
1417412_at	1.01802e-14	6.06898	6.02705	0.0419251		1426064_at	1.9923e-13	7.50226	7.54448	-0.0422186		1433587_at	4.10837e-08	6.99387	7.07799	-0.0841196
1437845_x_at	1.02581e-14	4.28636	4.34182	-0.0554527		1416446_at	2.0074e-13	5.70675	5.69352	0.0132273		1417133_at	4.10939e-08	7.26106	7.19616	0.064898
1446618_at	1.03453e-14	5.35965	5.55238	-0.192728		1440984_at	2.06225e-13	9.44809	9.49543	-0.0473373		1443931_at	4.12155e-08	8.73955	8.53724	0.202314
1426415_a_at	1.06198e-14	7.19074	6.88069	0.310055		1424657_at	2.06943e-13	5.24549	5.07776	0.167729		1415899_at	4.13293e-08	3.24559	3.23812	0.00746897
1437467_at	1.08841e-14	4.76192	4.757	0.0049213		1460317_s_at	2.07238e-13	6.38003	6.35666	0.023374		1434289_at	4.17486e-08	8.46166	8.35521	0.106446
1434618_at	1.13071e-14	4.92099	4.9848	-0.0638095		1422510_at	2.08258e-13	3.36042	3.0827	0.277718		1434388_at	4.1919e-08	6.88825	6.40481	0.483437
1451745_a_at	1.13082e-14	5.03149	5.07017	-0.0386812		1433778_at	2.09332e-13	4.37902	4.55635	-0.177332		1456378_s_at	4.2091e-08	2.51324	2.49451	0.0187347
1443771_x_at	1.15495e-14	5.45454	5.30548	0.149056		1432744_at	2.09605e-13	5.90208	5.64159	0.260491		1419156_at	4.21263e-08	7.37419	7.47979	-0.105599
1423389_at	1.15913e-14	8.43097	8.46676	-0.0357967		1415931_at	2.11396e-13	9.4509	9.34398	0.10692		1434109_at	4.21757e-08	3.61663	3.53948	0.0771472
1457470_at	1.16804e-14	3.89749	3.91213	-0.0146372		1416052_at	2.1204e-13	9.46621	9.46298	0.00323249		1448398_s_at	4.23597e-08	10.1946	10.4567	-0.26211
1441391_at	1.17807e-14	5.56127	5.60733	-0.0460614		1416432_at	2.14401e-13	13.2085	13.1394	0.0691038		1443713_at	4.23646e-08	7.54986	7.40987	0.139991
1438235_at	1.2304e-14	5.13173	5.20559	-0.0738563		1438797_at	2.15592e-13	8.82366	8.8556	-0.0319422		1425979_a_at	4.23744e-08	6.26156	6.35291	-0.0913527
1455370_at	1.23767e-14	8.2303	7.81242	0.41788		1421210_at	2.17034e-13	7.09736	6.93802	0.159339		1452780_at	4.29026e-08	7.60455	7.53747	0.0670829
1447452_at	1.24328e-14	6.58502	6.54336	0.0416569		1446992_at	2.17158e-13	6.4539	5.91049	0.543411		1451300_a_at	4.29537e-08	5.8516	5.90413	-0.0525221
1438731_at	1.29348e-14	7.98612	8.40265	-0.416536		1440161_at	2.1763e-13	6.42779	6.6317	-0.203912		1452731_x_at	4.31945e-08	8.5096	8.53724	-0.0276391
1426640_s_at	1.29576e-14	7.68433	6.36939	1.31494		1442206_at	2.19712e-13	5.10608	4.98639	0.119688		1457718_at	4.32217e-08	7.63329	7.67604	-0.0427508
1420866_at	1.33319e-14	8.87743	8.66077	0.216663		1447918_x_at	2.19847e-13	4.85898	4.73561	0.123374		1453850_at	4.33402e-08	6.96572	7.52804	-0.562314
1416506_at	1.37923e-14	13.5731	13.1919	0.381127		1436424_at	2.21339e-13	13.5477	13.5547	-0.00704217		1421173_at	4.43577e-08	6.61377	6.8022	-0.188434
1428337_at	1.39196e-14	6.09812	6.24396	-0.145835		1458612_at	2.22215e-13	5.7339	5.70477	0.0291287		1435265_at	4.47758e-08	8.53632	8.88275	-0.346428
1434027_at	1.41232e-14	7.87731	7.79667	0.0806439		1417114_at	2.22972e-13	7.50062	7.3136	0.18702		1416927_at	4.48625e-08	7.92401	7.93167	-0.00766252
1428132_at	1.45039e-14	6.303	5.79526	0.507741		1446381_at	2.25688e-13	5.38091	5.41381	-0.0328934		1424195_a_at	4.5241e-08	8.71994	8.92957	-0.209622
1448916_at	1.461e-14	5.85635	5.95086	-0.0945031		1457002_at	2.2588e-13	5.99531	5.90577	0.0895433		1440815_x_at	4.5596e-08	5.44953	5.72664	-0.277118
1449079_s_at	1.46883e-14	7.21499	7.46747	-0.252479		1425487_at	2.27071e-13	11.6836	12.1734	-0.489738		1416722_at	4.6944e-08	9.8004	9.89786	-0.0974662
1426864_a_at	1.48875e-14	6.79648	6.54354	0.252934		1436595_at	2.29262e-13	7.82219	7.65062	0.171568		1452817_at	4.70006e-08	2.85686	2.67916	0.177699
1419282_at	1.50269e-14	6.0041	6.78471	-0.780601		1439072_at	2.30286e-13	10.4982	10.7453	-0.247117		1459923_at	4.7591e-08	5.67998	5.738	-0.0580249
1440344_at	1.50765e-14	3.61147	3.79201	-0.180536		1434954_at	2.32121e-13	7.68377	7.51427	0.169505		1448165_at	4.76304e-08	5.40027	5.4432	-0.0429279
1452203_at	1.50786e-14	5.75152	5.34203	0.409487		1419721_at	2.32868e-13	7.14968	7.02759	0.12209		1452377_at	4.76349e-08	10.3344	9.71373	0.620671
1458889_at	1.5194e-14	9.60049	10.0412	-0.440713		1443023_at	2.33654e-13	2.78382	2.84104	-0.057216		1437283_at	4.76895e-08	7.01502	6.58569	0.429327
1434517_at	1.52114e-14	5.53302	5.13924	0.393779		1455516_at	2.35871e-13	5.40462	5.31609	0.0885258		1438947_x_at	4.77347e-08	6.40745	6.53274	-0.125292
1418131_at	1.52137e-14	7.08857	6.8627	0.22587		1417408_at	2.41771e-13	6.26399	5.78676	0.477225		1453299_a_at	4.80151e-08	5.98861	6.27006	-0.281451
1423905_at	1.52504e-14	8.91109	8.77493	0.136169		1432733_at	2.42791e-13	4.60375	4.76494	-0.161194		1419665_a_at	4.81862e-08	6.71161	6.64541	0.0662075
1433632_at	1.52674e-14	6.61884	6.7272	-0.108357		1429939_at	2.43143e-13	6.82817	6.82484	0.00333729		1457409_at	4.838e-08	7.76167	7.52356	0.238104
1419226_at	1.53597e-14	5.99989	6.00926	-0.00937165		1455123_at	2.43344e-13	6.77108	6.86954	-0.0984627		1443807_x_at	4.85275e-08	8.89766	8.90125	-0.0035906
1427464_s_at	1.55167e-14	7.56357	6.29695	1.26662		1428335_a_at	2.43914e-13	10.1208	10.431	-0.31022		1419512_at	4.87525e-08	9.22113	9.45373	-0.232602
1449085_at	1.56051e-14	7.26227	8.06725	-0.804987		1429406_at	2.45091e-13	3.54889	3.63219	-0.0832998		1424484_at	4.91347e-08	6.77693	7.82518	-1.04825
1451703_s_at	1.56249e-14	4.40216	4.41899	-0.0168323		1443069_at	2.46255e-13	2.43138	2.48059	-0.0492148		1451392_at	4.92451e-08	10.0808	9.7897	0.291066
1423167_at	1.64779e-14	8.16693	8.04499	0.121936		1457274_at	2.47522e-13	5.4311	5.59149	-0.160393		1416610_a_at	4.96455e-08	9.143	9.30011	-0.157111
1420877_at	1.6696e-14	7.57308	7.44562	0.127454		1435449_at	2.50851e-13	5.41715	5.49987	-0.0827209		1441906_x_at	5.02258e-08	7.15544	7.83212	-0.676677
1452887_at	1.68573e-14	7.97102	8.23153	-0.260512		1418479_at	2.50889e-13	7.57288	7.3385	0.234379		1426297_at	5.02561e-08	5.52787	5.62335	-0.0954777
1436039_at	1.74392e-14	9.17394	9.50133	-0.327391		1423722_at	2.52436e-13	7.70933	7.42436	0.284969		1425025_at	5.04202e-08	8.72464	8.69527	0.0293739
1423207_at	1.75508e-14	8.94233	8.95087	-0.00854309		1460643_at	2.52568e-13	3.15871	3.13984	0.0188619		1451972_at	5.06974e-08	6.40732	6.64935	-0.242023
1440178_x_at	1.76058e-14	3.83297	3.93583	-0.10286		1431515_at	2.53779e-13	3.81849	3.91832	-0.0998275		1418840_at	5.09924e-08	6.86545	6.62964	0.235809
1452327_at	1.77585e-14	2.66858	2.64275	0.0258241		1450913_at	2.54228e-13	4.94732	4.92996	0.0173598		1436297_a_at	5.13545e-08	6.41854	6.54558	-0.127035
1426044_a_at	1.80987e-14	8.19191	8.31763	-0.125712		1417209_at	2.56764e-13	12.5348	12.8591	-0.324268		1431592_a_at	5.16738e-08	6.38361	6.72807	-0.344462
1438307_at	1.81526e-14	8.73099	7.64891	1.08208		1433327_at	2.59194e-13	6.54671	6.46108	0.0856276		1454875_a_at	5.19398e-08	9.67259	9.87858	-0.205998
1449454_at	1.848e-14	6.67587	6.54084	0.135032		1447716_x_at	2.61215e-13	5.38948	5.4316	-0.0421254		1418991_at	5.21296e-08	6.83496	6.92597	-0.0910082
1419369_at	1.86561e-14	4.24339	4.36482	-0.121435		1450008_a_at	2.62886e-13	2.41196	2.37237	0.0395926		1423646_at	5.23687e-08	8.79742	8.61433	0.183096
1433874_at	1.88021e-14	4.13012	4.20604	-0.0759211		1435065_x_at	2.63441e-13	6.49893	6.39265	0.106281		1457097_at	5.27122e-08	4.13744	4.15632	-0.0188831
1460573_at	1.89092e-14	6.44476	6.72822	-0.28346		1457620_at	2.69754e-13	7.42709	7.05852	0.368573		1425581_s_at	5.29933e-08	7.48064	7.72083	-0.24019
1425335_at	1.89992e-14	10.4413	10.0439	0.397366		1429042_at	2.70602e-13	5.4381	5.53545	-0.0973546		1427068_x_at	5.30338e-08	8.59951	8.54091	0.0585951
1419641_at	1.90818e-14	7.73043	7.94538	-0.214951		1416931_at	2.71856e-13	9.79659	9.90947	-0.112882		1451193_x_at	5.36363e-08	6.81789	6.98101	-0.163127
1422490_at	1.93354e-14	5.10128	5.05059	0.0506806		1449444_a_at	2.80804e-13	7.44162	7.20986	0.231765		1421141_a_at	5.37496e-08	8.35103	9.02909	-0.678062
1416060_at	1.93876e-14	7.43785	7.63183	-0.193977		1456505_at	2.81941e-13	4.37394	4.63963	-0.265697		1451379_at	5.37523e-08	8.76304	8.73234	0.0307042
1427742_a_at	1.94216e-14	6.41504	6.48532	-0.0702808		1444329_at	2.8232e-13	10.337	10.5197	-0.182704		1421147_at	5.37599e-08	7.55303	7.4363	0.116727
1433864_at	1.95984e-14	10.136	8.84669	1.28935		1456535_at	2.84873e-13	5.04446	5.04166	0.00280163		1436201_x_at	5.38519e-08	8.77241	9.26466	-0.492251
1440273_at	1.9729e-14	6.26431	6.11499	0.149324		1445484_at	2.88954e-13	7.28917	7.48665	-0.197474		1451445_at	5.4199e-08	9.96599	10.1623	-0.196273
1434771_at	1.99332e-14	6.59432	6.61091	-0.0165894		1442394_at	2.91364e-13	2.48294	2.40745	0.0754898		1435185_at	5.42721e-08	4.03337	3.98996	0.0434113
1453313_at	2.00738e-14	6.26138	6.29842	-0.0370356		1458001_at	2.91725e-13	8.51854	8.85907	-0.340528		1450039_at	5.4458e-08	8.28802	8.31683	-0.0288167
1416985_at	2.01833e-14	9.68511	9.65513	0.0299762		1459667_at	2.92219e-13	5.08809	5.05623	0.0318642		1452690_at	5.45193e-08	4.56514	4.60554	-0.040403
1425216_at	2.07763e-14	7.77833	8.53491	-0.756578		1420078_at	2.92956e-13	4.31708	4.3863	-0.069223		1426017_a_at	5.45383e-08	6.99772	6.58653	0.411184
1416065_a_at	2.10027e-14	9.49579	9.28916	0.20663		1431492_at	2.94998e-13	5.50837	5.51234	-0.00396714		1450153_at	5.48173e-08	8.50329	8.65051	-0.14722
1426368_at	2.15799e-14	7.00893	6.67613	0.332803		1426372_a_at	2.9672e-13	6.9079	6.76076	0.147141		1436033_at	5.48475e-08	7.74763	7.92325	-0.175628
1434376_at	2.1671e-14	5.80367	5.95397	-0.150304		1452328_s_at	2.96928e-13	2.96377	2.99739	-0.03362		1446821_at	5.51806e-08	7.6541	7.49089	0.163217
1453395_at	2.18577e-14	2.77673	2.86187	-0.0851472		1417350_at	2.97357e-13	7.53173	7.40201	0.129728		1429046_at	5.54602e-08	9.29719	9.45764	-0.160446
1425482_s_at	2.21423e-14	6.17311	6.18873	-0.0156229		1460164_at	2.9989e-13	7.37567	7.62871	-0.253034		1417062_at	5.56637e-08	8.0984	8.07923	0.0191676
1437112_at	2.22761e-14	7.39579	7.36728	0.0285042		1437076_at	3.00694e-13	5.5544	4.6087	0.945699		1432004_a_at	5.61757e-08	8.45229	8.71383	-0.26154
1452729_at	2.26288e-14	5.65062	5.69142	-0.040795		1423190_at	3.04544e-13	7.75054	7.57709	0.17345		1439634_at	5.61939e-08	7.59793	7.94406	-0.346131
1428620_at	2.27624e-14	9.40205	9.45753	-0.0554796		1415696_at	3.10692e-13	2.86729	2.88466	-0.0173702		1418179_at	5.61985e-08	5.49871	5.49738	0.0013311
1418633_at	2.27992e-14	7.77821	7.62332	0.154897		1421638_at	3.11657e-13	7.6111	7.35179	0.259316		1424997_at	5.6754e-08	6.16308	6.1907	-0.027616
1451306_at	2.28151e-14	8.44771	8.48236	-0.0346524		1442891_at	3.12246e-13	4.98968	5.00924	-0.019559		1438761_a_at	5.68181e-08	7.76387	7.71873	0.0451318
1433619_at	2.30305e-14	2.43708	2.44483	-0.00775096		1441401_at	3.15893e-13	8.5173	8.49011	0.0271829		1416484_at	5.70723e-08	7.2554	7.63183	-0.376436
1426806_at	2.32991e-14	8.27569	8.36083	-0.0851383		1427229_at	3.17261e-13	6.66488	6.87583	-0.210951		1435070_at	5.71355e-08	5.7324	5.82075	-0.088343
1453590_at	2.3369e-14	4.84901	4.8932	-0.0441859		1417705_at	3.17856e-13	8.10881	7.89553	0.213275		1419908_at	5.71539e-08	8.50815	8.62229	-0.114142
1443071_at	2.35708e-14	5.23653	5.29618	-0.0596422		1456671_at	3.25634e-13	6.17779	6.05982	0.117971		1417409_at	5.77728e-08	9.52487	9.65475	-0.129879
1447613_at	2.3579e-14	4.00911	4.07205	-0.062947		1438123_at	3.28303e-13	7.34173	7.32558	0.0161523		1422548_at	5.77854e-08	5.17067	5.24891	-0.0782363
1422946_a_at	2.38142e-14	8.75226	8.30484	0.447428		1421857_at	3.34183e-13	6.18629	6.25916	-0.072878		1415703_at	5.79091e-08	11.766	12.0353	-0.269257
1439273_at	2.38766e-14	7.03337	6.82007	0.213293		1433810_x_at	3.35923e-13	8.74822	8.89197	-0.143754		1455388_at	5.81329e-08	9.08414	7.65598	1.42816
1442007_at	2.39524e-14	4.78057	4.62581	0.154761		1431418_at	3.39944e-13	2.82421	2.77722	0.0469927		1421919_a_at	5.84821e-08	7.88656	7.76926	0.117304
1428113_at	2.45013e-14	6.93092	7.11909	-0.188171		1440568_at	3.41275e-13	8.01883	8.14098	-0.122146		1424743_at	5.85574e-08	4.52484	4.66541	-0.140569
1419666_x_at	2.45527e-14	4.70567	4.87171	-0.166042		1458787_at	3.43663e-13	9.15343	8.657	0.496428		1420089_at	5.86446e-08	6.9359	7.07364	-0.137748
1458643_at	2.4921e-14	4.87131	4.87508	-0.00376864		1445538_at	3.46946e-13	5.01012	4.73414	0.275976		1439198_at	5.89946e-08	6.89753	6.7668	0.130736
1450913_at	2.51613e-14	8.41348	7.9531	0.460382		1434830_at	3.47539e-13	4.79236	4.66968	0.122675		1417056_at	5.90085e-08	8.25396	8.41442	-0.160455
1420481_at	2.52573e-14	7.41296	7.64689	-0.233933		1459531_at	3.53704e-13	6.73081	5.49807	1.23273		1444459_at	5.95952e-08	6.60054	6.87668	-0.276143
1446509_at	2.53269e-14	3.10802	3.11264	-0.00462098		1449890_at	3.5559e-13	3.93034	4.0581	-0.12776		1435531_at	5.99073e-08	5.14178	5.11286	0.0289159
1417509_at	2.54212e-14	8.94306	9.0341	-0.0910392		1454328_at	3.56815e-13	6.74199	6.6495	0.0924844		1425794_at	6.02275e-08	9.86467	9.67106	0.193614
1455944_at	2.55236e-14	5.34131	5.35929	-0.0179783		1416338_at	3.58566e-13	13.5731	13.2171	0.355941		1459983_at	6.02524e-08	5.59707	5.72624	-0.129167
1429484_at	2.57312e-14	6.08212	6.1316	-0.0494715		1423129_at	3.59058e-13	4.92718	4.54704	0.380136		1421765_at	6.03092e-08	8.70773	8.61209	0.0956319
1431289_at	2.6046e-14	3.44009	3.35149	0.0885958		1423006_at	3.59397e-13	6.50087	6.53458	-0.0337151		1424542_at	6.08043e-08	5.20415	5.14387	0.0602795
1439102_at	2.61942e-14	3.33627	3.01647	0.319801		1452230_at	3.63543e-13	5.6382	5.84929	-0.211094		1421838_at	6.10114e-08	9.15274	9.37832	-0.225572
1419405_at	2.65745e-14	5.44043	5.52752	-0.087094		1430378_at	3.64911e-13	4.33912	5.24325	-0.904127		1449734_s_at	6.1035e-08	6.19836	6.12464	0.0737225
1431749_a_at	2.71624e-14	14.0724	14.1435	-0.0710654		1447008_at	3.65982e-13	3.48747	3.50986	-0.0223846		1444055_at	6.10756e-08	4.76931	5.16162	-0.392307
1426396_at	2.76163e-14	8.72823	8.52791	0.200318		1431962_a_at	3.69566e-13	7.11585	5.85503	1.26082		1434904_at	6.10791e-08	6.44856	6.63434	-0.185777
1433981_s_at	2.8254e-14	7.58743	7.83016	-0.242725		1452118_at	3.70777e-13	5.49733	5.58801	-0.0906869		1448870_at	6.12344e-08	6.67203	6.74629	-0.07426
1434674_at	2.83364e-14	6.73016	7.18059	-0.450427		1455194_at	3.72202e-13	4.89699	4.855	0.0419946		1448337_at	6.12662e-08	11.6852	12.0414	-0.356174
1448681_at	2.84777e-14	6.63597	6.33546	0.300506		1453009_at	3.81154e-13	4.98833	5.22081	-0.232473		1458001_at	6.16654e-08	7.68362	7.62969	0.0539252
1427860_at	2.85009e-14	6.28146	6.43727	-0.15581		1419605_at	3.81835e-13	8.05921	8.04888	0.0103227		1445061_at	6.17562e-08	6.16056	6.3075	-0.146942
1417032_at	2.87555e-14	7.59347	7.55646	0.0370125		1417219_s_at	3.81875e-13	9.44201	9.22113	0.220878		1443894_at	6.17728e-08	5.69683	5.86611	-0.169284
1424129_at	2.89898e-14	8.80319	8.94925	-0.146059		1422761_at	3.82207e-13	7.94337	8.03261	-0.0892414		1424333_at	6.20345e-08	6.64545	6.78471	-0.139251
1426312_at	2.99846e-14	5.24549	5.08295	0.162537		1419815_at	3.85209e-13	8.47995	8.10923	0.370714		1423724_at	6.27881e-08	9.93065	9.31449	0.616162
1418497_at	3.03129e-14	4.93624	5.09945	-0.163202		1441545_at	3.85629e-13	2.79098	2.87895	-0.0879641		1458757_at	6.28217e-08	3.45638	3.55882	-0.102446
1435087_at	3.0336e-14	5.57162	4.9752	0.59642		1418160_at	3.8738e-13	7.4994	7.14261	0.356796		1457507_at	6.30085e-08	6.8127	6.83404	-0.0213466
1429943_at	3.07531e-14	3.82404	3.8602	-0.0361602		1423472_at	3.93626e-13	6.16826	6.07328	0.0949888		1416205_at	6.3066e-08	4.48061	4.53572	-0.0551181
1449150_at	3.11323e-14	5.14977	5.13692	0.0128479		1431777_a_at	3.99519e-13	3.64795	3.61734	0.0306133		1429533_at	6.33158e-08	10.205	10.1591	0.045869
1433916_at	3.12765e-14	8.42978	8.53724	-0.107459		1460251_at	4.00106e-13	5.1307	5.19114	-0.0604382		1439790_at	6.35425e-08	8.93369	8.64382	0.289869
1434002_at	3.24758e-14	5.03005	5.2346	-0.204556		1449342_at	4.03376e-13	4.4794	4.53042	-0.0510194		1457793_a_at	6.3686e-08	5.20472	5.4254	-0.220679
1427031_s_at	3.29287e-14	5.2977	5.35207	-0.0543747		1439374_x_at	4.04962e-13	7.77228	7.60289	0.169388		1421096_at	6.37395e-08	10.319	10.1174	0.201647
1450298_at	3.31844e-14	5.34994	5.34036	0.00958059		1454739_at	4.07516e-13	9.62942	8.9358	0.693627		1446991_at	6.39718e-08	5.15603	5.05499	0.10104
1428219_at	3.31945e-14	3.77272	3.80879	-0.0360696		1418760_at	4.08615e-13	13.7568	13.8956	-0.138785		1425330_a_at	6.41658e-08	6.0428	6.39291	-0.350111
1416933_at	3.41381e-14	9.69244	8.76343	0.929012		1422450_at	4.08726e-13	6.47519	6.1343	0.340898		1453569_s_at	6.4585e-08	5.69616	5.69775	-0.00159408
1424891_a_at	3.46234e-14	7.55567	7.80366	-0.247985		1441614_at	4.09066e-13	2.65489	2.69743	-0.0425407		1425326_at	6.46654e-08	7.558	7.7727	-0.214702
1447147_at	3.48925e-14	3.09099	3.16144	-0.0704459		1453294_at	4.09161e-13	4.59211	4.66814	-0.0760263		1421880_at	6.49442e-08	4.54709	4.5341	0.0129947
1434395_at	3.49785e-14	10.1032	9.79338	0.309838		1460243_at	4.09893e-13	8.45799	7.71647	0.741524		1455220_at	6.516e-08	5.83539	6.04235	-0.206952
1429693_at	3.53994e-14	5.52196	5.53304	-0.0110796		1423614_at	4.10057e-13	2.87158	3.03759	-0.16601		1449682_s_at	6.58033e-08	6.24771	6.52863	-0.280917
1460020_at	3.59627e-14	5.9763	6.04503	-0.0687276		1417838_at	4.11696e-13	7.60784	7.26095	0.34689		1438763_at	6.59605e-08	6.97919	7.24329	-0.2641
1458330_x_at	3.62282e-14	5.27798	5.39414	-0.116161		1430581_at	4.11791e-13	6.423	6.48013	-0.0571266		1452699_at	6.59765e-08	7.09865	7.1615	-0.0628555
1451486_at	3.63039e-14	3.84055	3.9169	-0.076349		1446931_at	4.11854e-13	4.04538	4.3255	-0.280119		1443427_at	6.6021e-08	8.5195	8.50359	0.0159029
1427935_at	3.64301e-14	7.46058	7.41911	0.0414759		1441613_at	4.12777e-13	4.64427	4.59656	0.0477088		1418067_at	6.6161e-08	8.83024	8.76897	0.0612748
1451506_at	3.72015e-14	3.08649	2.98108	0.105417		1448738_at	4.14752e-13	4.4077	4.59066	-0.18296		1427924_at	6.71332e-08	6.25195	6.17376	0.0781882
1436510_a_at	3.72057e-14	9.31177	8.77111	0.540658		1426227_s_at	4.16757e-13	9.83922	9.57332	0.2659		1434065_at	6.72228e-08	7.10354	7.4816	-0.378063
1455681_at	3.75274e-14	7.02222	7.45756	-0.435339		1439106_at	4.16818e-13	5.72588	5.73991	-0.01403		1455373_at	6.75096e-08	7.45205	7.48741	-0.0353686
1421534_at	3.78155e-14	6.00355	5.80582	0.197733		1458255_at	4.17036e-13	4.4955	4.49523	0.000271553		1440331_at	6.81441e-08	4.62194	4.80059	-0.178652
1432263_a_at	3.78796e-14	6.21295	6.21935	-0.00640062		1460641_a_at	4.17671e-13	4.10827	4.1705	-0.0622279		1460438_at	6.83748e-08	6.92756	7.01843	-0.0908623
1451612_at	3.79348e-14	2.93055	2.90793	0.022624		1419385_a_at	4.22653e-13	8.65058	8.01701	0.63356		1450976_at	6.87242e-08	10.4715	10.0656	0.405951
1417691_at	3.80808e-14	7.25338	6.78046	0.472925		1418507_s_at	4.24493e-13	9.97995	9.79772	0.18223		1458319_at	6.87706e-08	4.30667	4.34182	-0.0351429
1450569_a_at	3.82018e-14	8.00063	7.58749	0.413145		1425329_a_at	4.32188e-13	6.79648	6.46936	0.327115		1450186_s_at	6.91309e-08	5.8854	6.06179	-0.176394
1416465_a_at	3.87052e-14	8.26215	8.27183	-0.00967639		1432504_at	4.37588e-13	5.6009	5.40287	0.198035		1425096_a_at	6.92555e-08	5.61446	5.26742	0.34703
1436788_at	3.88264e-14	6.76328	6.43929	0.323991		1438885_at	4.38771e-13	8.63097	8.06789	0.563079		1448454_at	6.95635e-08	8.4184	7.9337	0.484699
1430623_s_at	3.88541e-14	4.50552	4.58264	-0.0771115		1435122_x_at	4.38845e-13	7.15554	7.27225	-0.116711		1423223_a_at	6.97765e-08	8.28048	8.5166	-0.236119
1419766_at	3.89684e-14	10.6847	9.6975	0.987217		1444793_at	4.49499e-13	6.64833	6.39137	0.256966		1428003_s_at	6.98011e-08	6.42308	6.73149	-0.308416
1416986_a_at	3.90488e-14	4.41146	4.63769	-0.22623		1425326_at	4.52284e-13	6.54648	6.49425	0.0522336		1431655_a_at	7.09119e-08	5.28518	5.20501	0.0801695
1460174_at	3.90555e-14	4.88109	4.99403	-0.112942		1453740_a_at	4.56252e-13	4.4392	4.79068	-0.351479		1420608_at	7.1045e-08	8.35864	7.96608	0.392554
1449156_at	4.0127e-14	4.31771	4.31772	-6.90033e-06		1444529_at	4.56531e-13	2.79398	2.97148	-0.177501		1426176_a_at	7.15649e-08	6.19653	6.66588	-0.469353
1438030_at	4.02379e-14	8.8335	8.72837	0.105126		1457200_at	4.57333e-13	9.66001	9.73156	-0.0715502		1424174_at	7.19094e-08	5.6968	5.64597	0.0508241
1425902_a_at	4.07893e-14	3.00753	2.90011	0.10742		1420509_at	4.59065e-13	12.6217	12.6973	-0.0756473		1418168_at	7.23903e-08	14.4818	14.4468	0.0350142
1452803_at	4.11411e-14	12.2184	9.86415	2.3542		1442524_at	4.59654e-13	5.57951	5.38489	0.194622		1424101_at	7.24793e-08	9.46541	9.73339	-0.267981
1418038_s_at	4.17557e-14	8.59065	8.29946	0.291188		1425683_at	4.59709e-13	7.00218	6.89207	0.110113		1418353_at	7.2502e-08	5.75755	5.68666	0.0708884
1429264_at	4.18066e-14	4.87449	4.8164	0.0580968		1426233_at	4.59952e-13	4.92869	4.53537	0.39332		1447959_at	7.32434e-08	8.16605	8.27453	-0.108477
1453993_a_at	4.22411e-14	4.58164	4.45802	0.123617		1422820_at	4.61828e-13	8.80951	8.41378	0.39573		AFFX-ThrX-M_at	7.33442e-08	10.1259	9.99114	0.134742
1457438_at	4.22713e-14	7.8596	7.61728	0.242316		1421863_at	4.66234e-13	2.94092	2.95602	-0.0150932		1437600_at	7.33705e-08	3.59634	3.61893	-0.0225924
1419753_at	4.27451e-14	6.38768	6.52498	-0.1373		1433476_at	4.7029e-13	8.35987	8.41559	-0.0557153		1448503_at	7.34387e-08	10.5617	10.5361	0.0255971
1434447_at	4.33361e-14	5.29203	5.3298	-0.0377772		1421233_at	4.74469e-13	4.3431	4.62354	-0.280438		1454719_at	7.40745e-08	9.55162	9.27928	0.272339
1428866_at	4.40103e-14	5.14994	5.56457	-0.414636		1423159_at	4.75563e-13	7.15183	7.12846	0.0233728		1426747_at	7.43187e-08	7.71664	7.76998	-0.0533329
1428510_at	4.4275e-14	3.73984	3.61735	0.122483		1416035_at	4.7721e-13	8.48919	8.026	0.463186		1426592_a_at	7.43904e-08	8.73908	8.37458	0.364504
1432339_at	4.44739e-14	5.13263	4.85808	0.274548		1448850_a_at	4.82697e-13	5.5523	5.14789	0.40441		1437214_at	7.47001e-08	7.02183	7.05093	-0.0290925
1437377_a_at	4.46623e-14	4.14792	4.15632	-0.00840436		1433707_at	4.84888e-13	4.33649	4.34795	-0.0114616		1418501_a_at	7.51548e-08	8.98409	8.94542	0.0386785
1459348_at	4.48973e-14	4.06493	4.04962	0.0153112		1453054_at	4.87522e-13	3.04521	3.0823	-0.037088		1428985_at	7.52213e-08	8.44528	8.36263	0.082659
1448248_at	4.62148e-14	5.54824	5.85432	-0.306075		1440345_at	4.93291e-13	5.47455	5.10082	0.373729		1445604_at	7.53336e-08	5.03058	4.99146	0.0391198
1455854_a_at	4.62402e-14	7.5075	7.48978	0.0177112		1444105_at	4.96215e-13	2.55968	2.58472	-0.0250349		1440108_at	7.54464e-08	6.83139	6.69925	0.132138
1430980_a_at	4.66484e-14	8.92911	8.83472	0.0943964		1430242_at	4.96341e-13	7.53779	7.53515	0.00263714		1437857_at	7.54908e-08	4.84518	4.77364	0.0715427
1448617_at	4.69958e-14	10.5542	11.0993	-0.545078		1459916_at	4.98741e-13	10.2289	7.63561	2.59326		1438663_at	7.56249e-08	4.84045	4.86544	-0.0249888
1426922_s_at	4.81296e-14	13.0942	13.0754	0.0187792		1426299_at	4.99672e-13	5.69928	5.77766	-0.0783849		1423902_s_at	7.59062e-08	4.64198	5.04092	-0.398931
1427564_at	4.89586e-14	4.93833	4.88321	0.0551209		1428557_a_at	5.02583e-13	9.90249	9.99849	-0.0959997		1424478_at	7.61044e-08	8.69319	8.85937	-0.166186
1425147_at	4.91591e-14	8.09098	7.84069	0.250289		1431974_at	5.04414e-13	7.91178	7.29331	0.618463		1427683_at	7.62639e-08	4.75192	4.75574	-0.00381617
1434985_a_at	4.93829e-14	6.32528	6.12464	0.200639		1423334_at	5.09159e-13	7.15206	6.88841	0.263647		1426358_at	7.6358e-08	6.41794	6.15105	0.266891
1446354_at	5.01671e-14	5.79741	5.68712	0.110297		1427243_at	5.09428e-13	5.56167	5.31936	0.242309		1438672_at	7.64138e-08	9.28405	9.19144	0.0926142
1421052_a_at	5.01713e-14	8.98204	8.98443	-0.00239161		1447898_s_at	5.09768e-13	3.26074	3.46787	-0.207136		1448560_at	7.71916e-08	8.89865	9.15099	-0.252341
1451401_a_at	5.05457e-14	6.84122	7.23245	-0.391227		1454400_at	5.1043e-13	9.05927	8.98303	0.0762414		1426232_at	7.72189e-08	6.65284	6.95072	-0.297887
1452911_at	5.07848e-14	2.82235	2.74638	0.0759703		1435434_at	5.1245e-13	5.62602	5.41873	0.207285		1424852_at	7.76002e-08	10.8295	11.239	-0.409559
1437448_s_at	5.13877e-14	4.62736	4.70845	-0.0810926		1451561_at	5.16104e-13	8.528	8.14339	0.384604		1426372_a_at	7.7773e-08	4.3863	4.43599	-0.0496905
1454268_a_at	5.16384e-14	5.22773	5.25457	-0.0268394		1451658_a_at	5.1803e-13	7.50388	7.32198	0.181901		1459239_at	7.79596e-08	5.09845	6.12262	-1.02416
1438802_at	5.1698e-14	3.47054	3.65569	-0.185145		1423670_a_at	5.18397e-13	9.5488	9.26064	0.288153		1460577_at	7.85656e-08	7.93469	7.91131	0.0233792
1417593_at	5.21127e-14	9.12835	8.79476	0.333582		1425795_a_at	5.19448e-13	8.65477	8.65477	-6.3932e-07		1426049_a_at	7.86458e-08	5.56372	5.68765	-0.123928
1455734_at	5.24615e-14	5.08359	5.12994	-0.0463574		1442900_at	5.19632e-13	6.74099	6.87155	-0.130564		AFFX-DapX-M_at	7.8722e-08	9.46326	9.31677	0.146491
1430594_at	5.25189e-14	3.18341	3.29841	-0.114998		1424211_at	5.26267e-13	9.78036	9.8865	-0.106131		1425467_a_at	7.89664e-08	6.67099	7.0385	-0.3675
1439154_at	5.26803e-14	5.97547	6.01899	-0.0435219		1437503_a_at	5.27194e-13	5.11462	4.9097	0.204925		1424622_at	7.89984e-08	11.2606	11.1656	0.0950188
1419165_at	5.27192e-14	8.90702	9.18127	-0.274257		1448970_at	5.29865e-13	7.62987	7.78321	-0.153338		1452246_at	8.01625e-08	7.42992	7.188	0.241915
1423673_at	5.34775e-14	7.35978	7.46019	-0.100417		1447764_at	5.31458e-13	10.3221	10.468	-0.145842		1455256_at	8.02313e-08	3.05124	3.07083	-0.0195892
1421821_at	5.3479e-14	8.48276	8.10677	0.375987		1436452_x_at	5.32216e-13	7.1083	7.12307	-0.0147696		1451794_at	8.0405e-08	8.05984	8.15037	-0.0905373
1417551_at	5.36314e-14	6.91296	6.61708	0.295874		1423228_at	5.35409e-13	8.40546	7.52298	0.882475		1449504_at	8.05899e-08	5.61994	6.21672	-0.596788
1455549_at	5.39684e-14	4.78177	4.82919	-0.0474237		1450445_at	5.35641e-13	3.62631	3.4891	0.137212		1443442_at	8.06865e-08	5.6928	5.73918	-0.0463792
1433982_at	5.39987e-14	7.89502	7.93683	-0.0418079		1453668_at	5.35687e-13	10.0366	10.3469	-0.310316		1419164_at	8.153e-08	5.07484	5.28467	-0.209827
1418655_at	5.42159e-14	8.20763	8.26685	-0.0592216		1444360_at	5.4217e-13	5.34858	5.58592	-0.237346		1431420_s_at	8.20232e-08	6.12888	6.20546	-0.0765756
1436585_at	5.52694e-14	6.45785	6.45641	0.00144587		1427292_at	5.47201e-13	5.93149	6.16056	-0.22907		1455349_at	8.23178e-08	5.00239	5.25807	-0.255681
1455242_at	5.53756e-14	3.24461	3.25362	-0.00901221		1435758_at	5.47294e-13	5.74322	5.66359	0.0796343		1424495_a_at	8.2824e-08	8.51735	8.84542	-0.328072
1421853_at	5.61223e-14	7.74736	7.72485	0.0225117		1447792_x_at	5.48117e-13	5.16674	5.05763	0.109112		1459999_at	8.30391e-08	7.84634	7.82725	0.0190905
1439456_x_at	5.63345e-14	8.53199	8.36533	0.166662		1423360_at	5.53558e-13	3.88049	3.79847	0.0820114		1447813_x_at	8.33452e-08	8.05113	8.05196	-0.000822548
1443082_at	5.64181e-14	3.8375	3.79153	0.0459697		1440385_at	5.53621e-13	4.08633	3.94074	0.145587		1433979_at	8.41489e-08	6.14388	6.19429	-0.0504115
1444542_at	5.72789e-14	5.98599	7.21827	-1.23227		1426313_at	5.53652e-13	8.52034	8.56098	-0.0406382		1416462_at	8.41908e-08	7.66788	7.78691	-0.119039
1416021_a_at	5.73734e-14	8.3912	8.33259	0.0586105		1446465_at	5.53806e-13	5.11392	5.22952	-0.115602		1448747_at	8.42579e-08	13.8548	13.8881	-0.0332669
1416863_at	5.78228e-14	2.74451	2.80691	-0.0623915		1426912_at	5.53996e-13	8.5253	8.27875	0.246549		1434618_at	8.43439e-08	4.19687	4.43762	-0.240751
1452068_at	5.79921e-14	3.07487	3.10713	-0.0322612		1447829_x_at	5.64315e-13	3.3298	3.26361	0.0661831		1424460_s_at	8.44264e-08	5.57537	5.52752	0.0478495
1427292_at	5.80078e-14	3.59586	3.52329	0.0725784		1445620_at	5.65761e-13	4.31647	4.45869	-0.142218		1435481_at	8.51644e-08	7.336	7.58838	-0.25238
1448648_at	5.9458e-14	5.26139	5.3353	-0.0739122		1426098_a_at	5.68873e-13	4.7426	4.69299	0.0496098		1434318_a_at	8.52685e-08	7.50052	7.41429	0.086226
1445640_at	5.98599e-14	6.13295	6.3489	-0.215947		1439035_at	5.74737e-13	5.1985	5.26243	-0.063929		1434668_at	8.54739e-08	3.47715	3.52329	-0.0461324
1449300_at	5.99143e-14	7.48027	7.31054	0.169723		1436839_at	5.774e-13	5.47424	5.50556	-0.0313224		1432339_at	8.56065e-08	4.77702	4.73904	0.0379792
1435221_at	6.27823e-14	6.82	6.81045	0.00954309		1430902_at	5.77626e-13	5.34639	5.09845	0.247933		1455187_at	8.56241e-08	7.46099	7.70203	-0.24104
1422053_at	6.44691e-14	14.4926	14.4924	0.000157468		1417601_at	5.82592e-13	6.37674	6.52894	-0.1522		1434507_at	8.56249e-08	7.35179	7.48018	-0.128392
1416392_a_at	6.5218e-14	8.07325	8.40742	-0.334177		1455332_x_at	5.8278e-13	3.34542	3.64491	-0.299493		1417279_at	8.56459e-08	9.13536	9.44626	-0.310897
1431423_a_at	6.58929e-14	10.9114	9.20552	1.70586		1431334_a_at	5.83822e-13	3.02381	3.11579	-0.0919805		1415998_at	8.58692e-08	14.3643	14.3493	0.0150538
1416458_at	6.6397e-14	10.0153	9.9235	0.0917616		1450396_at	5.84755e-13	4.2539	4.32206	-0.0681661		1421269_at	8.63094e-08	8.44175	8.24786	0.193884
1455656_at	6.68546e-14	5.23713	5.7991	-0.561975		1425955_at	5.86994e-13	5.99446	6.15639	-0.161933		1421911_at	8.67112e-08	4.32418	4.29669	0.0274919
1457218_at	6.68642e-14	8.03184	7.71581	0.31603		1434457_at	5.89191e-13	7.12321	7.51143	-0.388214		1448020_at	8.82513e-08	8.48652	8.46676	0.0197526
1452306_at	6.70431e-14	8.64065	8.80146	-0.160805		1460655_a_at	5.96666e-13	4.667	4.95132	-0.284316		1423433_at	8.87319e-08	11.0453	10.642	0.403279
1416022_at	6.71079e-14	9.02026	9.62144	-0.601176		1424711_at	6.02854e-13	7.00893	6.6281	0.380833		1455827_at	8.8835e-08	5.34841	5.3776	-0.0291864
1456678_at	6.71984e-14	4.6682	4.7092	-0.0410029		1420922_at	6.0689e-13	8.30122	8.26396	0.0372668		1454920_at	8.89779e-08	5.85675	6.02044	-0.16369
1420097_at	6.75335e-14	4.06169	3.6218	0.439889		1428312_at	6.08397e-13	9.65504	9.27732	0.37772		1416157_at	8.97985e-08	11.7063	11.3941	0.312164
1452169_a_at	6.8339e-14	6.1365	6.11172	0.0247741		1417033_at	6.09972e-13	7.67962	7.24815	0.431467		1423508_at	9.02991e-08	7.85032	7.60055	0.249769
1454824_s_at	6.83637e-14	5.58765	5.31601	0.271641		1431202_at	6.11725e-13	2.3894	2.48853	-0.0991239		1420249_s_at	9.06331e-08	6.67251	6.61708	0.055428
1456357_at	6.86876e-14	7.84409	8.48744	-0.643351		1416466_at	6.13843e-13	8.83048	8.40602	0.424463		1435657_at	9.11561e-08	7.35525	7.27488	0.0803651
1416722_at	6.90414e-14	10.5401	10.1312	0.408822		1442895_at	6.16775e-13	5.04118	4.76359	0.277597		1421334_x_at	9.12668e-08	12.3611	12.2009	0.160274
1417408_at	7.12554e-14	3.00817	2.93286	0.0753044		1446942_at	6.22373e-13	5.60401	5.52814	0.0758647		1437705_at	9.19819e-08	6.19081	6.18683	0.0039771
1426382_at	7.25806e-14	9.77354	9.44689	0.326651		1452646_at	6.23338e-13	5.80144	5.88145	-0.0800072		1452368_at	9.21704e-08	6.59689	6.87152	-0.274624
1434892_x_at	7.41111e-14	2.91137	2.9196	-0.00823678		1448787_at	6.27534e-13	4.40216	4.35563	0.0465308		1423488_at	9.21986e-08	4.93079	5.04992	-0.119132
1448026_at	7.42277e-14	7.00922	7.30347	-0.294247		1428779_at	6.27915e-13	4.36083	4.27594	0.0848876		1453712_a_at	9.2305e-08	7.74606	8.09439	-0.348329
1454895_at	7.62627e-14	7.15472	7.15663	-0.00190529		1442508_at	6.29244e-13	4.36131	4.52268	-0.161369		1423793_at	9.25934e-08	7.90781	7.7595	0.14831
1440451_at	7.63479e-14	3.40002	3.36208	0.0379397		1458347_s_at	6.30089e-13	4.75622	4.70499	0.0512246		1425086_a_at	9.33314e-08	6.83704	6.73929	0.0977569
1434214_at	7.67523e-14	9.73133	10.1114	-0.380027		1455000_at	6.44555e-13	9.01947	8.83429	0.185184		1449127_at	9.41643e-08	9.54478	9.34115	0.203628
1421230_a_at	7.86736e-14	8.0385	7.61142	0.427078		1445114_at	6.46301e-13	6.91812	6.73169	0.186432		1434498_at	9.4277e-08	5.43614	5.67491	-0.238767
1426373_at	7.9305e-14	9.53514	9.19643	0.338708		1452527_a_at	6.48191e-13	8.41345	7.79322	0.620234		1423989_at	9.45742e-08	13.7751	13.7798	-0.00466439
1449134_s_at	7.97033e-14	4.00613	3.84239	0.163747		1434430_s_at	6.56959e-13	9.89204	9.80426	0.0877729		1415693_at	9.47571e-08	10.7781	11.4009	-0.622823
1426738_at	7.97817e-14	6.70982	6.54546	0.164367		1459064_at	6.62551e-13	6.34649	6.63666	-0.290166		1423614_at	9.48281e-08	9.1749	9.11856	0.0563392
1426957_at	7.99569e-14	5.15313	5.03177	0.121358		1419653_a_at	6.65492e-13	6.08633	5.8765	0.209832		1449009_at	9.496e-08	8.79671	9.10135	-0.304635
1427404_x_at	8.17731e-14	6.31731	6.70892	-0.391612		1423462_at	6.73862e-13	5.58078	5.53395	0.046834		1452828_at	9.55849e-08	5.57806	5.78234	-0.204274
1436059_at	8.35992e-14	7.89917	7.57648	0.322695		1425668_a_at	6.81311e-13	8.44147	8.32396	0.117512		1420812_at	9.60959e-08	5.11739	5.22658	-0.10919
1438744_at	8.36294e-14	3.54457	3.55299	-0.00841576		1422852_at	6.83996e-13	7.56756	7.33757	0.229983		1419276_at	9.61127e-08	4.77843	4.77218	0.00625016
1427322_at	8.41953e-14	5.93006	6.06639	-0.136329		1429861_at	6.87013e-13	4.43238	4.49201	-0.0596202		1425911_a_at	9.72019e-08	7.11779	7.2545	-0.136706
1439565_at	8.42319e-14	3.31181	3.36481	-0.0530083		1447704_s_at	6.92688e-13	8.18352	8.36812	-0.184599		1421736_at	9.79204e-08	7.71558	7.97329	-0.257713
1429650_at	8.44861e-14	5.90816	5.83973	0.0684239		1441902_x_at	7.0273e-13	4.20162	4.27704	-0.0754175		1422601_at	9.79668e-08	8.28371	8.76977	-0.486057
1428594_at	8.51972e-14	3.15218	3.12758	0.0245979		1423753_at	7.07084e-13	3.7512	3.65259	0.0986129		1418578_at	9.81209e-08	4.75508	4.63769	0.117383
1442019_at	8.73902e-14	10.9705	10.4933	0.477266		1448611_at	7.09185e-13	3.71863	2.79847	0.920162		1458543_at	9.9206e-08	3.78309	3.77671	0.00637162
1419700_a_at	8.74948e-14	2.95094	2.9104	0.0405432		1415856_at	7.11604e-13	8.32053	8.13499	0.185532		1451978_at	9.95732e-08	6.41771	6.43544	-0.0177286
1453244_at	8.89214e-14	3.50442	3.53236	-0.0279407		1435546_a_at	7.11832e-13	4.34752	4.4687	-0.121174		1438561_x_at	1.00486e-07	6.44027	6.3576	0.0826785
1451733_at	8.92617e-14	5.11428	5.32746	-0.213183		1425803_a_at	7.13424e-13	7.56357	6.73965	0.823922		1440217_at	1.00641e-07	2.32942	2.40255	-0.0731251
1447174_at	9.1886e-14	3.57443	3.64532	-0.0708923		1458776_at	7.13878e-13	9.84383	9.27346	0.570371		1428726_at	1.00713e-07	10.0339	10.0338	4.05948e-05
1454967_at	9.23041e-14	4.49891	4.19501	0.303898		1433511_at	7.2823e-13	8.11743	8.35936	-0.241927		1426756_at	1.01733e-07	9.08367	8.66831	0.415357
1432526_a_at	9.23912e-14	3.72555	3.35373	0.371817		1442122_at	7.29804e-13	4.25388	4.11158	0.142299		1433058_at	1.01938e-07	9.03161	8.38663	0.644982
1420376_a_at	9.97232e-14	3.89018	3.93187	-0.0416945		1450026_a_at	7.31621e-13	7.35514	6.73393	0.621201		1428858_at	1.02146e-07	5.75227	5.86304	-0.110763
1442073_at	1.00266e-13	7.75066	6.99057	0.760085		1423135_at	7.31719e-13	3.0134	3.08555	-0.0721515		1429039_s_at	1.03034e-07	5.51299	5.41775	0.0952327
1459742_at	1.00633e-13	5.64654	5.71389	-0.0673439		1456200_at	7.34373e-13	10.3158	10.3965	-0.080684		1453893_at	1.03098e-07	8.09447	8.1101	-0.0156374
1454656_at	1.01721e-13	5.81675	5.91442	-0.0976644		1446006_at	7.37192e-13	7.29593	7.36653	-0.0705967		1421038_a_at	1.0319e-07	2.57884	2.61325	-0.0344117
1446503_at	1.02714e-13	7.85252	7.83824	0.0142873		1444535_at	7.37869e-13	5.57017	5.53223	0.0379466		1417153_at	1.03679e-07	9.26385	9.35592	-0.0920739
1451932_a_at	1.03285e-13	5.90346	5.88246	0.0210076		1455300_at	7.40525e-13	4.15635	4.17712	-0.0207776		1449962_at	1.03743e-07	5.10456	5.01966	0.0849042
1435574_at	1.03447e-13	5.04139	5.01177	0.0296192		1426484_at	7.42553e-13	7.74881	7.67482	0.0739878		1447999_x_at	1.03774e-07	7.73211	7.93015	-0.198046
1442723_at	1.04018e-13	5.56401	5.59092	-0.0269091		1433580_at	7.44459e-13	4.37453	4.59946	-0.224932		1437023_at	1.04149e-07	5.71483	5.30668	0.408147
1451206_s_at	1.06896e-13	6.71981	6.68177	0.038032		1429620_at	7.445e-13	4.94221	4.7587	0.183512		1416075_at	1.04277e-07	9.35226	9.46209	-0.109832
1444120_at	1.08017e-13	6.07543	6.07767	-0.00224573		1441544_at	7.55429e-13	2.95769	3.00596	-0.0482734		1458772_at	1.0428e-07	3.19353	3.19159	0.00194531
1426012_a_at	1.08849e-13	11.5634	8.83114	2.73228		1415779_s_at	7.57549e-13	10.3979	10.6314	-0.233467		1443717_at	1.04623e-07	4.79263	4.94154	-0.148915
1435394_s_at	1.09239e-13	3.2878	3.68768	-0.399883		1420804_s_at	7.6014e-13	7.95003	7.63167	0.318358		1428083_at	1.04701e-07	7.02552	7.01511	0.0104164
1431018_at	1.1118e-13	3.9741	3.99368	-0.0195808		1417573_at	7.60407e-13	9.29494	8.52496	0.769972		1452706_a_at	1.04891e-07	7.39348	7.49116	-0.0976753
1449324_at	1.13208e-13	8.08566	8.13588	-0.0502189		1415711_at	7.72362e-13	9.27283	9.54178	-0.268951		1460453_at	1.04968e-07	7.67899	6.81613	0.862866
1453288_at	1.14972e-13	4.87711	4.95773	-0.0806212		1416653_at	7.7684e-13	9.69244	8.98675	0.705687		1437743_at	1.05606e-07	8.4233	9.41184	-0.988543
1436050_x_at	1.1557e-13	5.68131	5.61078	0.0705313		1415863_at	7.80298e-13	10.7503	10.3217	0.428551		1419680_a_at	1.05622e-07	12.5072	12.5505	-0.0432736
1428702_at	1.20144e-13	5.16928	5.1905	-0.0212193		1455523_at	7.80384e-13	7.5471	7.28429	0.26281		1434895_s_at	1.05702e-07	5.8744	6.19061	-0.316214
1431961_at	1.22827e-13	3.05182	3.3369	-0.285071		1429685_at	7.86339e-13	6.714	6.71307	0.000934122		1450686_at	1.05965e-07	7.02933	7.1644	-0.135067
1450399_at	1.23979e-13	6.58549	6.48505	0.100446		1441736_at	7.92522e-13	3.63528	3.73685	-0.101562		1435939_s_at	1.06009e-07	3.1074	3.1628	-0.0553928
1431894_at	1.23996e-13	3.12413	3.17666	-0.0525277		1452895_at	8.03454e-13	7.12111	6.93031	0.190801		1424033_at	1.06148e-07	8.93796	9.18127	-0.243311
1437423_a_at	1.24453e-13	5.494	5.55975	-0.0657522		1443453_at	8.03667e-13	4.65592	4.87434	-0.218425		1434578_x_at	1.06964e-07	6.77744	6.84224	-0.0648041
1435231_at	1.28425e-13	11.3172	9.97807	1.33911		1425640_at	8.04264e-13	7.08581	6.43823	0.647571		1454021_a_at	1.07214e-07	8.22693	8.27634	-0.0494123
1443777_at	1.29708e-13	8.60283	8.5718	0.031033		1420370_s_at	8.15581e-13	2.96954	2.99617	-0.0266345		1451852_at	1.07679e-07	5.50018	5.45687	0.0433093
1425855_a_at	1.30825e-13	5.33418	5.54818	-0.214003		1439145_at	8.18992e-13	5.77653	5.6848	0.0917276		1416389_a_at	1.08349e-07	8.93737	9.13101	-0.193642
1441172_at	1.31023e-13	4.69517	4.73039	-0.0352193		1416851_at	8.22768e-13	13.03	13.2385	-0.208533		1449098_a_at	1.08576e-07	7.22792	7.24725	-0.0193259
1440856_at	1.32441e-13	2.82421	2.84797	-0.0237576		1423986_a_at	8.25941e-13	5.71899	5.67192	0.0470748		1424382_at	1.10718e-07	10.3049	10.7417	-0.436735
1440790_x_at	1.33259e-13	4.13895	4.12305	0.0159011		1448620_at	8.43563e-13	6.60351	6.4399	0.163605		1420869_at	1.10795e-07	3.38988	3.34387	0.0460102
1445141_at	1.35709e-13	3.98275	4.01282	-0.0300668		1455198_a_at	8.50592e-13	8.80801	8.92836	-0.12035		1451910_a_at	1.10966e-07	5.33156	5.42294	-0.0913798
1435240_at	1.36035e-13	5.38677	5.4347	-0.0479383		1420773_at	8.56304e-13	5.52492	5.35626	0.16866		1455337_at	1.11407e-07	9.09515	9.36396	-0.268808
1452015_at	1.36186e-13	3.86431	3.78846	0.0758543		1460217_at	8.58988e-13	5.93177	5.62568	0.306095		1428339_at	1.11996e-07	3.97638	3.97104	0.00534066
1429281_at	1.38518e-13	5.01186	5.00697	0.00488941		1457917_at	8.59582e-13	4.25879	4.12846	0.130322		1431340_a_at	1.1274e-07	6.46936	6.54354	-0.0741808
1422775_at	1.40112e-13	6.80018	6.51341	0.286766		1430203_at	8.69199e-13	6.21404	6.08542	0.128617		1420928_at	1.13473e-07	5.15761	5.37074	-0.213124
1418834_at	1.4083e-13	7.58748	6.93493	0.652549		1416061_at	8.70299e-13	8.60883	8.53356	0.0752712		1425936_a_at	1.15836e-07	12.2978	12.5907	-0.292901
1425860_x_at	1.42049e-13	7.43709	7.31412	0.122976		1451041_at	8.78294e-13	4.83707	4.76562	0.0714516		1436938_at	1.15839e-07	7.74803	7.79065	-0.0426268
1425197_at	1.42207e-13	7.46427	7.56434	-0.100065		1423333_at	8.82321e-13	6.24034	6.24996	-0.00961805		1440245_at	1.16112e-07	6.24117	6.38051	-0.139339
1452038_at	1.4259e-13	4.22986	4.18812	0.041741		1445113_at	8.83875e-13	7.8115	7.53788	0.273623		1431612_at	1.1626e-07	4.78456	4.83677	-0.0522077
1456870_at	1.43864e-13	11.6875	10.1104	1.57708		1423838_s_at	8.84923e-13	8.10306	8.24627	-0.14321		1421605_a_at	1.16272e-07	9.86744	10.6577	-0.790223
1441725_at	1.4598e-13	5.39614	5.45069	-0.0545511		1445024_at	8.88022e-13	6.14082	5.81932	0.321499		1436718_at	1.16279e-07	6.21506	6.50532	-0.290261
1443964_at	1.46673e-13	6.54671	6.53787	0.00883731		1416308_at	8.95924e-13	6.11718	5.08622	1.03096		1423794_at	1.17534e-07	7.28813	7.36851	-0.0803734
1415791_at	1.46915e-13	14.2019	14.1482	0.0536361		1416429_a_at	9.04668e-13	6.12982	5.77392	0.35591		1416382_at	1.17599e-07	7.72707	7.59563	0.131438
1435555_at	1.47514e-13	5.73587	5.33175	0.404117		1459961_a_at	9.12847e-13	9.8756	8.95017	0.925421		1435797_at	1.19058e-07	5.78948	5.70778	0.081693
1435580_at	1.50178e-13	2.6058	2.76483	-0.159032		1440047_at	9.17177e-13	4.89304	4.88548	0.00756397		1424426_at	1.20412e-07	8.65857	8.76244	-0.103866
1452682_at	1.50448e-13	4.09038	4.22762	-0.137239		1438046_at	9.18345e-13	5.98394	5.90577	0.0781719		1452338_s_at	1.2092e-07	3.65259	3.76249	-0.109904
1460643_at	1.52724e-13	5.84504	6.02321	-0.178165		1458851_at	9.19362e-13	6.80956	6.7444	0.065163		1454723_at	1.21009e-07	5.57455	5.99265	-0.418098
1428499_at	1.53458e-13	4.82829	4.83326	-0.00496896		1444120_at	9.24622e-13	4.08923	3.97966	0.10957		1452175_at	1.21034e-07	5.17631	4.99194	0.184369
1424555_at	1.53971e-13	8.68501	8.67289	0.0121281		1447877_x_at	9.37644e-13	7.23014	6.42747	0.802677		1423599_a_at	1.21162e-07	2.91155	2.94824	-0.0366818
1458205_at	1.54559e-13	3.53731	3.64876	-0.111453		1434290_at	9.46448e-13	4.46587	4.37263	0.0932368		1437491_at	1.21279e-07	5.71667	6.12252	-0.405853
1423954_at	1.5712e-13	7.22603	7.3186	-0.0925677		1445800_at	9.52071e-13	4.39147	4.53474	-0.143268		1423306_at	1.21778e-07	8.50633	8.28876	0.217573
1447977_x_at	1.5807e-13	5.00856	4.80617	0.202395		1449901_a_at	9.53136e-13	5.49368	5.4477	0.0459877		1418597_at	1.22052e-07	8.16614	8.49278	-0.326641
1416235_at	1.58739e-13	11.5576	11.9683	-0.410657		1416191_at	9.59371e-13	8.35823	8.42727	-0.069041		1455584_at	1.22059e-07	7.13047	7.52474	-0.394267
1417840_at	1.58914e-13	5.25013	5.37074	-0.12061		1420889_at	9.65935e-13	5.23525	5.09635	0.138903		1433641_at	1.22248e-07	7.49817	7.14152	0.356645
1421852_at	1.59151e-13	8.2742	8.21751	0.0566953		1416658_at	9.83774e-13	8.93069	8.98409	-0.0534065		1433532_a_at	1.2339e-07	8.39152	8.35929	0.0322333
1419022_a_at	1.64341e-13	9.82449	9.94582	-0.121333		1452545_a_at	9.85253e-13	5.02319	5.03984	-0.0166492		1444556_at	1.24064e-07	5.63188	5.57863	0.0532508
1425871_a_at	1.65023e-13	6.74646	6.02077	0.725688		1446496_at	9.91107e-13	4.9145	5.05308	-0.138571		1422444_at	1.24749e-07	9.45846	9.43224	0.0262123
1440847_at	1.66947e-13	3.80756	3.84155	-0.0339884		1419627_s_at	9.91886e-13	9.18659	9.01489	0.171704		1444969_at	1.25007e-07	5.77039	5.94926	-0.17887
1421322_a_at	1.69288e-13	3.4847	3.5253	-0.0405976		1415893_at	9.9616e-13	9.08246	8.94733	0.13513		1451402_at	1.25381e-07	7.12953	7.11793	0.0115993
1428029_a_at	1.74282e-13	4.64714	4.3514	0.295742		1428141_at	1.01516e-12	6.92481	6.66007	0.264744		1416362_a_at	1.25713e-07	10.2295	10.1983	0.0311176
1439484_at	1.7438e-13	3.06421	3.18839	-0.124174		1421676_at	1.01768e-12	6.02838	6.04164	-0.0132589		1454611_a_at	1.26154e-07	10.2151	10.1217	0.0933974
1440020_at	1.74489e-13	2.46033	2.38724	0.0730884		1421819_a_at	1.01865e-12	10.0818	10.4749	-0.393141		1421028_a_at	1.26216e-07	6.60783	6.4346	0.173237
1430154_at	1.75215e-13	6.93907	6.90408	0.0349895		1426978_at	1.01991e-12	5.26131	5.17615	0.0851669		1434091_at	1.2714e-07	4.33067	4.2559	0.0747763
1439671_at	1.82891e-13	6.23945	6.14926	0.0901957		1422403_at	1.03639e-12	6.86446	6.56172	0.30274		1460688_s_at	1.27514e-07	3.86043	3.80915	0.0512846
1459362_at	1.83768e-13	4.67929	4.61146	0.0678304		1425977_a_at	1.03686e-12	5.09856	5.40957	-0.311006		1445753_at	1.27971e-07	5.0654	5.24622	-0.180821
1451965_at	1.85702e-13	5.4428	5.50468	-0.0618788		1436718_at	1.03997e-12	4.58465	4.58322	0.00142957		1443058_at	1.28063e-07	2.55459	2.45879	0.0958
1445711_at	1.883e-13	4.46587	4.54794	-0.0820745		1420121_at	1.04053e-12	6.0518	6.15114	-0.0993361		1448485_at	1.28134e-07	5.75513	5.89843	-0.143304
1446844_at	1.88982e-13	4.85038	4.19934	0.651043		1459254_at	1.04488e-12	5.35424	5.2196	0.134643		1447846_x_at	1.28527e-07	3.48175	3.46637	0.0153814
1442605_at	1.90256e-13	4.7002	4.71669	-0.0164915		1426775_s_at	1.04565e-12	12.2722	12.3235	-0.0513052		1426172_a_at	1.28533e-07	10.5874	10.9417	-0.354274
1448439_at	1.92581e-13	6.04915	6.06582	-0.0166664		1427898_at	1.04729e-12	4.23167	4.12953	0.102132		1428202_at	1.28778e-07	9.71995	9.44689	0.273058
1448607_at	1.94235e-13	4.42181	4.40094	0.0208703		1453045_at	1.05073e-12	3.05139	3.48698	-0.435585		1430447_a_at	1.29135e-07	8.66243	8.83247	-0.170039
1426956_a_at	1.96571e-13	7.30609	7.44204	-0.135956		1454213_at	1.05489e-12	5.37975	5.85025	-0.470495		1439408_a_at	1.29378e-07	4.35061	4.11804	0.23257
1440355_at	1.96938e-13	3.02095	3.04901	-0.0280624		1419488_at	1.05545e-12	9.87778	8.8191	1.05868		1428490_at	1.29473e-07	6.13619	6.3	-0.163809
1435732_x_at	1.98193e-13	8.2188	8.1101	0.108694		1456991_at	1.06202e-12	6.22718	6.34799	-0.120803		1453433_at	1.29939e-07	6.90007	7.0973	-0.197234
1433745_at	2.03618e-13	7.81861	7.28041	0.538194		1416497_at	1.06944e-12	6.48538	7.05964	-0.574263		1425335_at	1.29999e-07	6.43427	6.6422	-0.207932
1460204_at	2.04057e-13	6.34461	6.28269	0.0619218		1419144_at	1.07599e-12	8.15434	7.81021	0.344131		1456121_at	1.30653e-07	5.54408	5.80685	-0.262771
1435153_at	2.04745e-13	9.68429	9.71233	-0.028034		1454109_a_at	1.08366e-12	4.52283	4.4408	0.0820257		1422109_at	1.31568e-07	7.11437	7.12207	-0.00769513
1459877_x_at	2.04756e-13	7.15972	7.25285	-0.0931309		1415887_at	1.08372e-12	6.53649	6.62241	-0.0859158		1418822_a_at	1.31828e-07	8.84919	8.9367	-0.0875059
1424842_a_at	2.06487e-13	7.37796	7.68306	-0.305105		1445440_at	1.08923e-12	7.43959	7.29523	0.144354		1419128_at	1.31922e-07	3.42905	3.40829	0.0207542
1455894_at	2.11121e-13	5.34348	5.70148	-0.358005		1421562_at	1.09499e-12	2.61108	2.5924	0.0186822		1440411_at	1.32051e-07	6.63404	6.70579	-0.0717515
1434589_x_at	2.11426e-13	6.00536	6.42217	-0.416818		1460057_at	1.09797e-12	7.69558	7.74189	-0.0463158		1460460_a_at	1.3261e-07	4.99107	4.87438	0.116689
1449317_at	2.11759e-13	7.3871	7.18381	0.203291		1422791_at	1.10712e-12	7.5041	7.32651	0.17759		1419169_at	1.34518e-07	4.12394	3.97503	0.148918
1419705_at	2.12606e-13	5.97254	6.13367	-0.161128		1422499_at	1.1082e-12	11.1713	10.8641	0.307209		1431220_at	1.35755e-07	4.49636	4.54738	-0.051018
1426311_s_at	2.15199e-13	4.80606	4.87438	-0.0683152		1423307_s_at	1.11274e-12	7.10797	6.63786	0.470111		1424293_s_at	1.35767e-07	9.72071	8.08961	1.6311
1425921_a_at	2.1532e-13	7.17669	6.74535	0.431339		1415700_a_at	1.11416e-12	8.52598	8.85574	-0.329753		1440370_at	1.3586e-07	7.96564	8.02706	-0.0614228
1416505_at	2.19048e-13	9.86454	9.15117	0.713376		1428138_s_at	1.12249e-12	6.92844	6.60958	0.318852		1434705_at	1.36005e-07	2.98847	2.92353	0.0649404
1460255_at	2.22608e-13	8.3814	8.70657	-0.325168		1448819_at	1.12278e-12	5.83999	5.5829	0.257095		1445767_at	1.36386e-07	10.9403	10.9108	0.0295114
1418607_at	2.31131e-13	7.57288	7.33916	0.233718		1440988_at	1.12415e-12	5.9066	6.02572	-0.11912		AFFX-r2-Bs-thr-M_s_at	1.36497e-07	11.0172	10.9635	0.0536769
1428052_a_at	2.32188e-13	6.82428	6.77155	0.0527287		1425471_x_at	1.12691e-12	8.16977	8.12499	0.0447778		1449055_x_at	1.37779e-07	6.90862	7.01246	-0.103843
1436705_at	2.34081e-13	4.03953	4.0677	-0.0281779		1420751_at	1.12717e-12	6.6627	6.36965	0.293053		1440900_at	1.37856e-07	3.37038	3.38166	-0.0112863
1423360_at	2.42208e-13	6.86446	6.73441	0.130045		1447605_at	1.13313e-12	5.07292	5.07173	0.00119363		1426888_at	1.38019e-07	4.97659	4.8824	0.0941939
1416329_at	2.43276e-13	8.72799	8.46752	0.260467		1460104_at	1.1343e-12	4.89291	4.58901	0.3039		1425464_at	1.38106e-07	10.7295	10.0342	0.695294
1450786_x_at	2.43359e-13	7.66634	7.87373	-0.207388		1422632_at	1.13512e-12	6.44889	6.49149	-0.0426019		1420638_at	1.3893e-07	7.41228	6.55673	0.855548
1425494_s_at	2.46138e-13	9.2734	9.46795	-0.19455		1415783_at	1.13752e-12	9.10065	8.8026	0.29805		1427568_a_at	1.39156e-07	3.46948	3.5253	-0.0558233
1438566_at	2.46739e-13	5.37438	5.3801	-0.00572072		1453581_at	1.14483e-12	6.07476	6.21768	-0.142917		1419165_at	1.39312e-07	11.0776	11.1488	-0.0711479
1449909_at	2.47477e-13	8.38902	8.6965	-0.307475		1448617_at	1.14708e-12	3.84055	3.85986	-0.0193111		1434333_a_at	1.39737e-07	12.9578	12.974	-0.0161702
1454729_at	2.49089e-13	4.73813	4.40672	0.331415		1429579_at	1.17057e-12	4.10737	4.18077	-0.0733953		1449028_at	1.40612e-07	8.54678	8.48779	0.0589923
1450459_at	2.49839e-13	6.98202	6.7293	0.252713		1420814_at	1.17165e-12	10.1169	10.446	-0.329035		1423489_at	1.40654e-07	2.47976	2.51726	-0.0375032
1456509_at	2.5083e-13	6.60961	6.5807	0.0289044		1437992_x_at	1.17775e-12	3.9976	3.7961	0.201505		1421369_a_at	1.40704e-07	6.81511	6.90285	-0.087741
1451374_x_at	2.53293e-13	4.76261	4.88238	-0.119772		1448094_at	1.18242e-12	5.11347	4.97426	0.139209		1422428_at	1.41255e-07	6.1396	6.63726	-0.497658
1417888_at	2.53725e-13	6.30875	6.4346	-0.125848		1427077_a_at	1.20022e-12	7.25542	7.23015	0.0252714		1452286_at	1.41261e-07	6.12843	6.18662	-0.0581959
1423388_at	2.54512e-13	7.60089	7.93015	-0.32926		1434498_at	1.20098e-12	7.14166	6.66368	0.477975		1446642_at	1.41865e-07	5.99703	6.06257	-0.065547
1435122_x_at	2.5543e-13	6.85603	6.61052	0.245515		1435480_at	1.20455e-12	6.43208	6.5033	-0.071213		1415840_at	1.42247e-07	10.0281	10.2047	-0.176604
1455095_at	2.55898e-13	9.97886	9.96839	0.0104668		1438881_at	1.21168e-12	6.98172	5.99946	0.982258		1448534_at	1.43111e-07	9.14132	9.39669	-0.255377
1449666_at	2.59208e-13	6.818	6.87156	-0.0535583		1418169_at	1.21327e-12	8.20564	8.22922	-0.0235796		1419361_at	1.43202e-07	13.4898	13.4908	-0.00103349
1457897_at	2.59988e-13	6.82445	6.88703	-0.0625807		1423193_at	1.2165e-12	9.31182	9.15449	0.157333		1418123_at	1.43741e-07	7.24143	7.41818	-0.176748
1418540_a_at	2.62428e-13	6.4769	6.39582	0.081087		1456644_at	1.22834e-12	6.00139	5.87037	0.131029		1434286_at	1.43865e-07	7.64643	7.97987	-0.333437
1425435_at	2.64343e-13	5.53734	5.79501	-0.257671		1449262_s_at	1.2306e-12	5.60653	5.52086	0.0856721		1451243_at	1.44214e-07	3.79847	3.90097	-0.102492
1438577_at	2.70513e-13	5.3682	5.42701	-0.0588148		1427464_s_at	1.24329e-12	11.2415	11.3169	-0.0754109		1426538_a_at	1.4466e-07	7.58071	7.55974	0.0209787
1448443_at	2.70587e-13	8.07687	7.94443	0.132441		1452429_s_at	1.25242e-12	3.76277	3.67957	0.0831931		1424824_at	1.44879e-07	7.94983	8.11483	-0.165003
1424288_at	2.71024e-13	7.51687	6.37518	1.14169		1420654_a_at	1.25292e-12	6.2709	6.30419	-0.0332909		1459151_x_at	1.45075e-07	7.74098	7.93259	-0.191609
1452706_a_at	2.71646e-13	4.34752	4.67994	-0.332413		1417884_at	1.27849e-12	10.7319	10.5568	0.175112		1429650_at	1.46177e-07	4.01869	3.99014	0.0285474
1431726_a_at	2.72091e-13	4.15288	3.73236	0.420518		1434804_at	1.28519e-12	6.49219	6.46311	0.0290744		1420463_at	1.4674e-07	5.7726	6.03068	-0.258072
1438010_at	2.72183e-13	7.95138	8.07336	-0.121981		1426624_a_at	1.29202e-12	9.16013	8.93975	0.220383		1418774_a_at	1.47003e-07	4.13933	4.22617	-0.0868424
1426004_a_at	2.7471e-13	9.91481	10.5168	-0.601939		1453562_a_at	1.29393e-12	8.51508	8.45353	0.0615476		1449250_at	1.47484e-07	3.09213	3.20024	-0.108114
1427139_at	2.77845e-13	5.60642	5.1667	0.439724		1438135_at	1.29755e-12	5.91803	5.82989	0.0881361		1428737_s_at	1.47538e-07	8.85417	8.57732	0.276852
1424508_at	2.79798e-13	8.95578	8.68666	0.269123		1425653_at	1.30107e-12	5.38522	4.6823	0.702922		1425744_a_at	1.48218e-07	7.62568	7.99515	-0.369474
1426276_at	2.82016e-13	8.63863	9.04319	-0.404558		1420703_at	1.32989e-12	6.37856	6.16942	0.209138		1424989_at	1.49386e-07	8.0062	7.94538	0.060823
1424988_at	2.82375e-13	3.64373	3.72324	-0.0795069		1446582_at	1.33085e-12	5.9854	6.22117	-0.235775		1447479_at	1.53465e-07	6.10212	5.13182	0.970294
1421023_at	2.83279e-13	11.479	11.6609	-0.181944		1439510_at	1.3332e-12	5.90512	5.86204	0.0430822		1434334_at	1.5401e-07	8.04129	8.126	-0.0847065
1417201_at	2.83665e-13	7.14513	6.92597	0.219165		1455886_at	1.36204e-12	5.63506	5.609	0.0260574		1419823_s_at	1.55583e-07	7.76615	8.25257	-0.486414
1428119_a_at	2.84565e-13	9.87668	9.2753	0.601377		1419099_x_at	1.36655e-12	7.75021	7.81613	-0.0659212		1440482_at	1.56031e-07	7.90197	7.74457	0.157395
1421765_at	2.85602e-13	10.832	11.072	-0.23995		1424294_at	1.38118e-12	8.38893	8.3257	0.063229		1417558_at	1.56378e-07	8.07993	8.16848	-0.0885542
1444213_at	2.88406e-13	5.35075	5.47835	-0.127605		1432658_at	1.38174e-12	4.41069	4.54158	-0.130888		1434356_a_at	1.56704e-07	7.03245	7.3175	-0.285053
1424996_at	2.89339e-13	10.5926	10.3419	0.250641		1444215_at	1.38174e-12	3.53459	3.59503	-0.0604421		1452218_at	1.57118e-07	3.80373	3.95347	-0.149739
1456685_at	2.94438e-13	6.71386	6.98673	-0.272874		1429980_x_at	1.38675e-12	6.42554	6.28348	0.142057		1451004_at	1.57162e-07	4.82604	5.25118	-0.425138
1440169_x_at	2.94802e-13	3.3729	3.47743	-0.104527		1415956_a_at	1.40133e-12	8.63789	8.32364	0.314252		1419829_a_at	1.57366e-07	5.25739	5.23266	0.0247254
1417492_at	2.95291e-13	7.53173	7.48767	0.0440639		1425738_at	1.40724e-12	4.50007	4.62413	-0.124054		1419872_at	1.57696e-07	8.12984	8.58076	-0.450922
1421847_at	2.96988e-13	3.43704	3.12004	0.317		1446790_at	1.44129e-12	6.30532	6.54835	-0.243028		1451952_at	1.59372e-07	4.58003	4.63098	-0.050951
1454693_at	2.98676e-13	7.82219	7.60659	0.215595		1432777_at	1.44631e-12	4.82441	4.97284	-0.148434		1435431_at	1.59817e-07	11.2724	11.3845	-0.112154
1430137_at	2.98881e-13	7.25702	7.00786	0.249162		1419309_at	1.47446e-12	7.39038	7.07623	0.314151		1424508_at	1.60287e-07	6.9303	7.375	-0.444696
1441544_at	3.02829e-13	2.98831	3.03804	-0.0497332		1456479_at	1.48872e-12	5.79371	5.86511	-0.0713952		1427376_a_at	1.60946e-07	6.84968	6.90971	-0.0600242
1437111_at	3.05424e-13	4.26116	4.32843	-0.0672718		1449677_s_at	1.49953e-12	7.149	7.07298	0.0760166		1443595_at	1.60996e-07	5.86708	6.01546	-0.148384
1418751_at	3.06136e-13	6.56899	6.64185	-0.0728597		1460671_at	1.5001e-12	3.59696	3.79271	-0.195744		1459580_at	1.6182e-07	8.26768	8.06405	0.203626
1427016_at	3.09148e-13	6.43089	6.4025	0.0283886		1449958_a_at	1.50075e-12	8.74491	6.66775	2.07717		1419084_a_at	1.63223e-07	7.88169	8.01961	-0.13792
1451141_at	3.09641e-13	5.94154	5.84108	0.100455		1425521_at	1.50692e-12	4.83892	4.47076	0.368168		1428493_at	1.64177e-07	5.47502	5.4575	0.0175173
1423571_at	3.11223e-13	10.4165	10.4567	-0.0402264		1452077_at	1.53157e-12	5.43638	5.32883	0.107553		1427051_at	1.64395e-07	12.3391	12.3533	-0.0142255
1436941_at	3.19934e-13	3.38284	3.4409	-0.058068		1452397_at	1.53264e-12	14.1775	13.9023	0.275244		1418243_at	1.64541e-07	4.75613	4.74634	0.00979768
1455783_at	3.31003e-13	7.34173	7.69882	-0.357095		1417971_at	1.549e-12	3.99475	4.04712	-0.0523698		1450211_at	1.65462e-07	4.73852	4.74507	-0.00654535
1436215_at	3.3698e-13	4.08257	3.91365	0.168924		1453420_at	1.56866e-12	3.76608	3.85204	-0.0859573		1453221_at	1.65596e-07	4.27327	4.2153	0.0579695
1423590_at	3.38114e-13	5.2226	5.00554	0.217052		1428547_at	1.5705e-12	11.1841	11.3743	-0.190161		1434697_at	1.65857e-07	6.20195	6.70042	-0.498476
1426771_at	3.42194e-13	6.42403	6.53143	-0.107396		1453467_s_at	1.57211e-12	3.83631	3.82046	0.0158437		1427358_a_at	1.66498e-07	8.10778	8.19784	-0.0900594
1453200_at	3.43785e-13	6.0415	4.78645	1.25506		1428655_at	1.58047e-12	7.95904	7.41452	0.544517		1415688_at	1.66638e-07	14.0045	13.924	0.0804969
1421235_s_at	3.44124e-13	5.3055	5.37986	-0.0743604		1449835_at	1.58104e-12	6.4994	6.70875	-0.20935		1452941_at	1.67506e-07	7.15978	7.27191	-0.112121
1430704_at	3.50798e-13	14.1775	12.5328	1.64472		1450641_at	1.5847e-12	6.15939	6.19583	-0.036439		1428926_at	1.6761e-07	6.18291	6.39711	-0.214201
1438279_at	3.5358e-13	3.80736	3.8543	-0.046938		1419776_at	1.60376e-12	3.34269	3.43283	-0.0901331		1420069_at	1.67946e-07	9.79295	9.70195	0.0910009
1418860_a_at	3.55712e-13	13.0221	13.1017	-0.0796732		1426369_at	1.60618e-12	7.05214	7.31987	-0.26773		1416881_at	1.67975e-07	7.39658	7.47011	-0.0735309
1418355_at	3.57873e-13	8.9315	9.12515	-0.193645		1459386_at	1.61727e-12	7.5304	7.42507	0.105335		1426820_at	1.70238e-07	8.14339	7.98955	0.153839
1417458_s_at	3.62804e-13	7.90572	7.71805	0.187673		1457665_x_at	1.62041e-12	7.60533	7.36145	0.243875		1416435_at	1.71319e-07	9.37143	9.62144	-0.250009
1431377_at	3.63526e-13	8.04977	8.29054	-0.240767		1421940_at	1.64146e-12	5.60568	5.11123	0.494455		1435263_at	1.72097e-07	8.42083	8.75463	-0.333801
1420498_a_at	3.64024e-13	8.44302	8.15756	0.285468		1426600_at	1.6415e-12	8.9184	8.93369	-0.0152867		1426743_at	1.72126e-07	7.68023	7.44562	0.234608
1448751_at	3.64096e-13	6.75107	6.47439	0.276685		1456732_at	1.65376e-12	5.38427	5.20314	0.181131		1446262_at	1.72352e-07	7.92445	8.14181	-0.217357
1433921_s_at	3.68397e-13	5.93846	5.99602	-0.0575502		1454685_at	1.66817e-12	4.91222	4.93888	-0.026667		1418041_at	1.72808e-07	8.12863	8.2651	-0.136471
1436405_at	3.70984e-13	5.34371	5.36148	-0.0177746		1425162_at	1.67386e-12	6.18959	6.44007	-0.250487		1434884_at	1.72889e-07	6.96255	7.05483	-0.0922765
1450937_at	3.74908e-13	13.1046	12.5583	0.5463		1447920_at	1.67407e-12	4.76754	4.08781	0.679735		1449262_s_at	1.73559e-07	6.72992	6.68759	0.0423293
1423137_at	3.75694e-13	5.21001	5.00134	0.208665		1457238_at	1.68851e-12	7.13491	7.26909	-0.134185		1426246_at	1.74373e-07	7.25529	7.51961	-0.264322
1454919_at	3.78239e-13	7.66985	7.67298	-0.00313103		1422556_at	1.69063e-12	8.34909	8.61333	-0.264238		1422746_s_at	1.74381e-07	7.3385	7.33916	-0.000661073
1424057_at	3.90993e-13	8.25441	8.38396	-0.129547		1420396_at	1.69527e-12	10.0167	9.46975	0.546912		1451395_at	1.75013e-07	7.33117	7.45471	-0.123532
1430986_at	4.0256e-13	7.39068	6.9743	0.416381		1441591_at	1.71004e-12	6.16095	5.87321	0.287744		1454917_at	1.75486e-07	6.25072	6.0985	0.152219
1422895_at	4.13639e-13	5.42237	5.44291	-0.0205395		1427108_at	1.73715e-12	5.39861	5.32251	0.0760978		1435242_at	1.76614e-07	6.2462	7.68572	-1.43952
1428446_at	4.15827e-13	6.25391	6.32335	-0.0694429		1428592_s_at	1.75876e-12	9.42479	9.15414	0.270649		1452181_at	1.76837e-07	6.84308	7.14242	-0.299341
1434267_at	4.24854e-13	5.08924	5.04986	0.0393809		1433384_at	1.76721e-12	6.49696	6.32733	0.169636		1440396_at	1.77268e-07	7.1501	6.94001	0.210081
1435351_at	4.34349e-13	4.91299	4.98227	-0.0692772		1438782_at	1.77808e-12	6.84183	6.56174	0.280083		1431746_a_at	1.77686e-07	4.25097	4.35196	-0.100984
1455146_at	4.37832e-13	7.1086	7.1708	-0.0621961		1418634_at	1.79948e-12	8.60046	8.64249	-0.0420313		1419226_at	1.78213e-07	7.52978	7.55854	-0.0287672
1446908_at	4.39165e-13	6.33676	6.42633	-0.0895638		1436139_at	1.81731e-12	2.93919	2.93238	0.00681091		1421314_at	1.78255e-07	10.5568	10.1462	0.410582
1420920_a_at	4.40975e-13	9.55979	9.30794	0.251856		1436813_x_at	1.83824e-12	5.04598	5.01203	0.0339502		1446593_at	1.79227e-07	5.67419	6.05275	-0.37856
1439283_at	4.43524e-13	5.68408	5.63262	0.0514585		1448543_at	1.85767e-12	8.96608	9.26746	-0.301378		1434645_at	1.7936e-07	6.89207	6.47639	0.415684
1444177_at	4.44248e-13	5.57375	5.69463	-0.120877		1452565_x_at	1.86618e-12	8.9495	8.93461	0.0148853		1423126_at	1.80161e-07	8.98262	9.12375	-0.141131
1436371_at	4.49906e-13	4.66014	4.60069	0.0594523		1430316_at	1.87938e-12	3.15145	3.0958	0.0556456		1459892_at	1.80231e-07	7.78034	7.82449	-0.0441531
1415828_a_at	4.53378e-13	8.90865	9.16099	-0.25234		1434485_a_at	1.87982e-12	5.3699	5.41477	-0.0448643		1453264_at	1.81197e-07	6.18344	6.21218	-0.028734
1428411_at	4.54873e-13	3.60464	3.6005	0.00413711		1458192_at	1.88623e-12	11.1445	11.5646	-0.420115		1434175_s_at	1.8204e-07	9.22602	9.0663	0.159718
1419714_at	4.55079e-13	7.07973	7.18298	-0.103249		1422620_s_at	1.89173e-12	8.89006	8.69103	0.199028		1417890_at	1.82206e-07	5.01555	5.03379	-0.0182339
1438063_at	4.56744e-13	4.9604	5.03418	-0.0737841		1456383_at	1.90827e-12	11.3134	10.7739	0.539446		1451218_at	1.82634e-07	7.80185	8.08325	-0.2814
1449347_a_at	4.59199e-13	8.11711	8.07209	0.0450196		1443056_at	1.92567e-12	5.82134	5.50282	0.318519		1443495_at	1.8301e-07	6.10314	6.16198	-0.0588423
1455102_at	4.63086e-13	3.57041	3.53276	0.0376428		1458140_at	1.95118e-12	5.65871	5.65801	0.00069191		1452966_at	1.83159e-07	7.81994	7.23526	0.584682
1440343_at	4.7145e-13	3.55878	3.53574	0.0230353		1422690_at	1.96674e-12	9.3324	9.13202	0.200378		1417227_at	1.84267e-07	6.0954	6.26939	-0.173996
1448440_x_at	4.82537e-13	8.88861	8.57825	0.310363		1424241_at	1.98228e-12	7.05848	6.91566	0.142822		1453804_a_at	1.84464e-07	7.63624	7.70541	-0.069168
1455116_at	4.88843e-13	7.6901	8.23955	-0.549443		1439884_at	1.9989e-12	4.87131	4.88976	-0.018455		1421215_a_at	1.84887e-07	4.41143	4.50524	-0.0938031
1418340_at	5.00602e-13	7.4084	6.70507	0.703331		1424347_at	2.00636e-12	5.79089	5.50617	0.284721		1451141_at	1.85079e-07	6.24996	7.05556	-0.805595
1436177_at	5.05337e-13	4.50814	4.44465	0.0634881		1430922_at	2.00763e-12	3.59352	3.53855	0.0549684		1438817_at	1.85185e-07	7.02617	7.40371	-0.377542
1455683_a_at	5.07211e-13	3.67938	3.6433	0.0360781		1450669_at	2.00838e-12	3.87038	3.486	0.384383		1457971_at	1.85525e-07	6.9816	7.00581	-0.0242074
1451095_at	5.13103e-13	5.07127	5.78197	-0.710694		1425861_x_at	2.03168e-12	4.82735	4.89624	-0.0688866		1448390_a_at	1.86686e-07	8.16594	7.85908	0.306863
1430622_at	5.27595e-13	6.44326	6.47528	-0.032025		1453733_a_at	2.04193e-12	5.15613	5.22224	-0.0661051		1419026_at	1.86922e-07	8.89727	8.95966	-0.0623951
1452542_x_at	5.28e-13	14.7088	14.7479	-0.039121		1447984_at	2.04361e-12	5.36239	5.15306	0.209333		1453260_a_at	1.87804e-07	6.81768	6.81256	0.00512308
1439747_at	5.30832e-13	4.07192	4.1004	-0.0284724		1453288_at	2.04825e-12	2.70096	2.64521	0.0557576		1421491_a_at	1.88395e-07	4.04712	4.02414	0.0229798
1460436_at	5.34769e-13	5.11302	5.06507	0.0479457		1434892_x_at	2.04932e-12	6.14979	6.29812	-0.148327		1428191_s_at	1.8889e-07	4.01635	4.02311	-0.00676192
1430448_at	5.4108e-13	5.51489	5.5657	-0.050809		1458984_at	2.052e-12	7.784	7.61206	0.171939		1446851_at	1.90481e-07	5.66141	5.45302	0.208393
1417793_at	5.46237e-13	6.32812	5.69344	0.63468		1442315_at	2.05392e-12	4.5945	4.68406	-0.0895626		1454967_at	1.92934e-07	10.6387	10.6355	0.00319959
1417160_s_at	5.48727e-13	4.53701	4.52639	0.0106237		1449485_at	2.05836e-12	5.00382	5.18055	-0.176729		1428314_at	1.93896e-07	8.34824	8.1719	0.176333
1449988_at	5.58692e-13	6.08545	5.53784	0.547608		1455426_at	2.06499e-12	14.1718	14.2416	-0.0698582		1427004_at	1.94307e-07	10.7731	10.8887	-0.115547
1427035_at	5.68937e-13	7.68986	7.20154	0.488319		1448960_at	2.07172e-12	5.4428	5.5841	-0.141307		1460003_at	1.94697e-07	6.1493	6.30728	-0.157988
1455796_x_at	5.78215e-13	10.3547	10.4973	-0.142624		1444318_at	2.08295e-12	4.73941	4.83892	-0.0995125		1427147_at	1.94936e-07	4.82404	5.21979	-0.395753
1440206_at	5.78478e-13	3.59352	3.60702	-0.0134997		1430665_at	2.09468e-12	7.62378	7.40867	0.215108		1428476_a_at	1.95164e-07	4.58389	4.56927	0.0146227
1440669_at	5.80201e-13	2.50299	2.4982	0.00478817		1452291_at	2.14971e-12	7.23999	7.09411	0.145889		1446018_at	1.9551e-07	6.69153	6.88543	-0.193906
1456688_at	5.81077e-13	7.34812	7.31509	0.0330302		1457522_at	2.15617e-12	4.28948	4.2038	0.0856837		1426289_at	1.95694e-07	6.01739	6.04859	-0.0311977
1419023_x_at	5.85701e-13	8.30026	8.32764	-0.0273837		1426655_a_at	2.17558e-12	8.83408	8.5848	0.249278		1439379_x_at	1.97851e-07	3.07019	3.07719	-0.00699707
1440370_at	5.87689e-13	9.30204	9.05956	0.242476		1423547_at	2.20232e-12	7.76384	8.07437	-0.310523		1422268_a_at	1.98164e-07	8.32411	8.23541	0.0886989
1435099_at	5.97256e-13	7.01708	7.26269	-0.245602		1453503_at	2.2025e-12	5.1973	5.15019	0.047111		1458579_at	1.98901e-07	10.7375	11.0764	-0.338817
1447253_x_at	5.99441e-13	4.66887	4.76306	-0.0941899		1440020_at	2.2066e-12	5.27305	5.3471	-0.0740585		1425671_at	2.0029e-07	13.2025	13.1784	0.0240637
1452002_at	6.01536e-13	8.82385	6.97006	1.8538		1441806_at	2.20714e-12	6.01059	6.01087	-0.000277101		1425976_x_at	2.00479e-07	7.26612	7.0342	0.231918
1448552_s_at	6.02347e-13	7.37324	7.45903	-0.0857861		1420433_at	2.2079e-12	3.90586	3.95386	-0.0479935		1429216_at	2.01214e-07	8.13621	8.1334	0.00281084
1425531_at	6.03167e-13	6.48984	6.59136	-0.101517		1420310_at	2.22091e-12	6.60834	6.08037	0.52797		1435490_at	2.0154e-07	5.99507	5.8855	0.109572
1423978_at	6.05549e-13	5.99392	6.03248	-0.0385554		1422677_at	2.22476e-12	6.87095	6.82439	0.0465634		1418459_at	2.01551e-07	8.98675	8.76343	0.223324
1452021_a_at	6.06171e-13	6.57597	6.65908	-0.0831119		1435571_at	2.24956e-12	5.86939	5.94017	-0.0707829		1448218_s_at	2.01903e-07	6.56993	6.68967	-0.119739
1426923_at	6.08833e-13	12.642	12.7108	-0.0688374		1434040_at	2.25813e-12	4.68303	4.48316	0.199865		1430449_at	2.0298e-07	7.10326	8.01736	-0.914106
1416880_at	6.20641e-13	3.53698	3.04272	0.494263		1447714_x_at	2.28025e-12	4.73927	4.88123	-0.141961		1459595_at	2.03222e-07	5.09381	5.16431	-0.0705008
1438784_at	6.22441e-13	3.65816	3.59005	0.0681094		1438747_at	2.29307e-12	7.80409	7.2098	0.594286		1428009_a_at	2.03329e-07	4.27256	4.43148	-0.158914
1447092_at	6.31044e-13	5.55168	4.75836	0.793326		1443225_at	2.3039e-12	4.53664	4.60213	-0.0654896		1438134_at	2.03694e-07	5.17872	5.34661	-0.167889
1458089_at	6.33871e-13	7.08865	7.58021	-0.491559		1423382_a_at	2.32183e-12	6.29369	5.8516	0.442086		1422997_s_at	2.03917e-07	5.86268	6.05024	-0.187564
1449170_at	6.41234e-13	7.35293	7.33713	0.0157996		1443348_at	2.3231e-12	5.47604	5.76212	-0.286081		1429191_at	2.04175e-07	8.36863	8.24044	0.128191
1425193_at	6.46887e-13	7.58276	7.72955	-0.146783		1425822_a_at	2.34088e-12	7.45533	7.66883	-0.213508		1432872_at	2.05177e-07	7.1643	7.4256	-0.261299
1448795_a_at	6.55629e-13	6.18836	6.13386	0.0545054		1438573_at	2.35409e-12	3.03991	2.99998	0.0399261		1440137_at	2.05298e-07	8.5848	8.39412	0.190678
1417585_at	6.5593e-13	5.85761	5.88155	-0.0239368		1416543_at	2.36439e-12	14.4098	14.4818	-0.071935		1422565_s_at	2.05428e-07	6.00466	6.39582	-0.391153
1448298_at	6.60724e-13	6.96862	7.06152	-0.0928976		1416424_at	2.36693e-12	9.71501	10.1176	-0.40255		1435171_at	2.05526e-07	3.92724	3.87099	0.056244
1450816_at	6.68994e-13	5.91939	5.96383	-0.0444405		1418468_at	2.38257e-12	7.56235	7.28362	0.278729		1455161_at	2.07491e-07	9.44682	9.27226	0.174561
1447995_x_at	6.69715e-13	6.57582	6.33032	0.245497		1432560_at	2.39522e-12	6.66261	6.47449	0.188113		1448185_at	2.07869e-07	9.34208	9.25006	0.0920113
1439462_x_at	6.70738e-13	6.84655	7.09457	-0.248017		1416157_at	2.39759e-12	8.74903	8.35232	0.396702		1422787_at	2.07978e-07	7.60672	7.62332	-0.0166004
1437540_at	6.74419e-13	11.384	11.9314	-0.547452		1432174_a_at	2.39998e-12	3.35035	3.41979	-0.0694441		1437065_at	2.1127e-07	4.53537	4.69671	-0.161334
1436180_at	6.82091e-13	6.85779	7.23545	-0.377654		1426393_a_at	2.41877e-12	6.59658	6.29695	0.299638		1435769_at	2.117e-07	8.50851	8.44901	0.059495
1456147_at	6.92968e-13	4.55483	4.61491	-0.0600751		1458518_at	2.44484e-12	4.77551	4.66564	0.109866		1421872_at	2.1259e-07	6.49998	6.21509	0.284897
1423986_a_at	6.9318e-13	12.0767	12.1187	-0.0419759		1449053_s_at	2.46782e-12	3.80398	3.76073	0.0432457		1445881_at	2.13282e-07	8.9422	8.83652	0.105681
1455678_at	6.99209e-13	4.45417	4.48791	-0.0337405		1430689_at	2.47042e-12	8.31936	8.33172	-0.012351		1424921_at	2.13806e-07	6.78747	6.65093	0.136541
1418888_a_at	7.05999e-13	7.46457	7.48308	-0.0185018		1424574_at	2.4757e-12	2.69097	2.86911	-0.178142		1457720_at	2.14172e-07	4.05027	4.14478	-0.0945068
1435571_at	7.13106e-13	5.52949	5.73379	-0.204299		1452812_at	2.49267e-12	4.63406	4.53836	0.0956944		1449824_at	2.16202e-07	7.78307	7.93284	-0.149775
1421873_s_at	7.14388e-13	4.35631	4.14008	0.21623		1441126_at	2.50175e-12	4.70434	4.70908	-0.00474256		1434532_at	2.16636e-07	7.49159	7.29279	0.198795
1421547_at	7.16446e-13	6.4934	6.62205	-0.128652		1452843_at	2.51217e-12	9.46648	9.66639	-0.199907		1433838_at	2.17078e-07	12.1734	12.3047	-0.131297
1429205_at	7.20388e-13	7.48234	8.57242	-1.09008		1459717_at	2.51728e-12	5.61756	5.71744	-0.0998796		1448700_at	2.1718e-07	10.4815	10.3817	0.0997837
1448050_s_at	7.23211e-13	6.18858	6.20878	-0.0202064		1439349_at	2.52029e-12	6.01577	5.8951	0.120664		1440463_at	2.17513e-07	6.1931	6.27069	-0.0775882
1449608_a_at	7.23905e-13	4.92263	5.03632	-0.113687		1429897_a_at	2.53206e-12	3.86636	3.71855	0.147803		1450899_at	2.17809e-07	8.73805	8.6047	0.133349
1416702_at	7.304e-13	7.99382	7.41818	0.575637		1438294_at	2.53425e-12	8.38632	7.73424	0.652086		1423399_a_at	2.18106e-07	7.54565	7.83215	-0.286506
1456566_x_at	7.38442e-13	6.01105	5.60913	0.401926		1433058_at	2.5482e-12	3.80569	3.89593	-0.0902332		1424247_at	2.19107e-07	10.631	10.3865	0.244468
1443932_at	7.44947e-13	2.57122	2.27926	0.291956		1453100_at	2.55815e-12	2.9244	2.87454	0.0498513		1423490_at	2.20226e-07	10.3173	10.4325	-0.115259
1423053_at	7.52922e-13	7.99039	7.63271	0.357674		1417016_at	2.59207e-12	11.0044	11.2367	-0.232249		1434086_at	2.21155e-07	4.87013	5.1667	-0.296569
1449259_at	7.60166e-13	6.44967	6.20213	0.247542		1423332_at	2.59689e-12	7.82202	7.32057	0.501451		1456178_at	2.21161e-07	3.66578	3.70055	-0.0347719
1419455_at	7.65603e-13	5.2863	4.91563	0.370662		1445777_at	2.63574e-12	6.18744	6.27245	-0.0850122		1451571_s_at	2.21849e-07	5.9834	5.69613	0.287277
1460135_at	7.67137e-13	3.3965	3.49873	-0.102234		1431511_at	2.63883e-12	4.00169	4.09615	-0.0944648		1422393_at	2.22099e-07	5.43881	5.48721	-0.0484052
1460402_at	7.73202e-13	4.55135	4.56639	-0.0150385		1437909_at	2.64778e-12	6.01956	6.01587	0.00368564		1421895_at	2.22569e-07	9.28998	9.28556	0.00442245
1435766_at	7.8615e-13	10.8534	11.5881	-0.734697		1418539_a_at	2.65154e-12	6.73652	6.46969	0.266824		1416525_at	2.23609e-07	8.52639	8.90796	-0.381574
1444894_at	7.90566e-13	4.34299	4.3107	0.0322889		1422272_at	2.65349e-12	7.88149	7.9096	-0.0281096		1424433_at	2.23814e-07	10.8938	11.1201	-0.226287
1452982_at	7.93937e-13	7.72571	5.34253	2.38318		1428720_s_at	2.66864e-12	4.62736	4.82176	-0.194404		1429317_at	2.25285e-07	6.22715	6.24422	-0.0170627
1444347_at	8.0418e-13	3.60009	3.64199	-0.0418939		1421392_a_at	2.67598e-12	3.07324	3.23765	-0.164411		1454998_at	2.2561e-07	9.8865	9.79426	0.0922305
1423058_at	8.05155e-13	7.79926	7.66935	0.129915		1416522_a_at	2.68353e-12	11.1613	10.8971	0.264208		1424225_at	2.25631e-07	8.31173	8.476	-0.164269
1423854_a_at	8.22264e-13	6.49081	6.47904	0.0117721		1438324_at	2.69262e-12	7.13053	7.22645	-0.0959175		1417781_at	2.26759e-07	5.58113	5.65871	-0.0775824
1455953_x_at	8.34823e-13	8.06257	7.96054	0.102028		1428148_s_at	2.70657e-12	7.19652	7.07963	0.11689		1449495_at	2.27614e-07	7.73716	8.0664	-0.329241
1428967_at	8.35117e-13	5.20473	5.35065	-0.145913		1443271_at	2.72845e-12	4.55171	4.56264	-0.0109308		1416140_a_at	2.28311e-07	14.0544	14.0412	0.0132503
1451387_s_at	8.3738e-13	4.75799	4.22432	0.533672		1427792_at	2.75981e-12	7.97971	7.88644	0.0932662		1427628_at	2.28478e-07	7.81632	8.17588	-0.359561
1429504_at	8.4125e-13	4.90712	4.90416	0.00296399		1418162_at	2.7604e-12	7.02002	7.03068	-0.0106657		1447777_x_at	2.28486e-07	8.0026	7.9969	0.00569849
1417775_at	8.56426e-13	3.36309	3.34387	0.0192194		1453242_x_at	2.77096e-12	3.32032	3.2962	0.0241241		1427614_at	2.28542e-07	11.1575	11.1489	0.0085677
1426620_at	8.64393e-13	6.12816	5.78829	0.339871		1456828_at	2.77594e-12	6.83232	6.82246	0.00986202		1426504_a_at	2.30089e-07	8.29874	8.30886	-0.0101194
1435186_s_at	8.67303e-13	9.23871	8.51409	0.724623		1446913_at	2.77723e-12	4.30713	4.33725	-0.0301172		1452868_at	2.30557e-07	7.06512	7.2832	-0.218079
1433922_at	8.67319e-13	4.15002	4.10814	0.0418816		1426616_at	2.78345e-12	6.85544	6.45545	0.399991		1424296_at	2.33699e-07	5.32207	4.96288	0.359189
1451025_at	8.68229e-13	6.45564	5.48917	0.966472		1450908_at	2.80828e-12	8.3814	8.60145	-0.220048		1460571_at	2.33942e-07	8.21781	8.50693	-0.289115
1426552_a_at	8.72384e-13	10.0284	10.1685	-0.140121		1440171_x_at	2.81791e-12	5.7978	5.54084	0.256969		1417463_a_at	2.33956e-07	8.33462	8.4099	-0.0752754
1419637_s_at	8.7582e-13	5.7017	5.80778	-0.106084		1435450_at	2.85153e-12	7.32877	7.20503	0.123739		1453897_at	2.34033e-07	7.08272	7.14034	-0.0576125
1432367_a_at	9.09387e-13	8.58337	8.3032	0.280169		1443625_at	2.86387e-12	6.83662	6.68066	0.155961		1452856_at	2.34212e-07	6.03391	6.04174	-0.00782809
1436452_x_at	9.0954e-13	4.3724	4.39894	-0.0265389		1429310_at	2.87577e-12	6.72332	6.72149	0.00182946		1451249_at	2.34732e-07	4.74418	4.85765	-0.113474
1416459_at	9.15968e-13	6.77747	6.68406	0.0934146		1434164_s_at	2.88673e-12	5.79693	5.66733	0.129595		1454801_at	2.34793e-07	4.58807	4.54768	0.0403909
1424495_a_at	9.16454e-13	5.36076	5.39905	-0.0382977		1435477_s_at	2.89707e-12	5.94602	5.99815	-0.0521387		1421142_s_at	2.34939e-07	7.60779	7.71357	-0.105783
1436078_at	9.33991e-13	7.6551	7.13514	0.519963		1454045_a_at	2.89771e-12	5.03005	4.56923	0.460814		1421861_at	2.35765e-07	9.05788	9.29089	-0.233012
1425295_at	9.41635e-13	7.19087	6.87152	0.319353		1416737_at	2.93429e-12	9.60956	9.71313	-0.103571		1415755_a_at	2.37611e-07	9.67979	9.63013	0.049656
1418518_at	9.45245e-13	5.17682	5.24891	-0.0720938		1435644_at	2.9737e-12	5.70456	5.69846	0.00610481		1429267_at	2.37713e-07	5.9529	6.14966	-0.196752
1420867_at	9.55707e-13	10.0167	9.809	0.207671		1460221_at	2.97896e-12	8.31873	6.52811	1.79062		1443264_at	2.38731e-07	3.3344	3.41335	-0.078953
1441342_at	9.55992e-13	6.72784	7.32848	-0.600648		1453351_at	3.00656e-12	6.69821	6.84815	-0.14994		1455094_s_at	2.39287e-07	10.431	10.3791	0.0519108
1436820_at	9.59959e-13	7.95904	7.72771	0.231326		1416110_at	3.01501e-12	11.5342	11.6341	-0.0998502		1423965_at	2.4012e-07	5.2105	5.13042	0.0800841
1441855_x_at	9.6e-13	8.96085	7.6509	1.30995		1420558_at	3.01524e-12	10.6139	10.7731	-0.159229		1439820_at	2.42026e-07	4.18392	4.06169	0.122232
1416064_a_at	9.62021e-13	7.74117	7.8657	-0.124534		1450196_s_at	3.0764e-12	4.49891	4.17056	0.328348		1434503_s_at	2.42493e-07	5.97384	6.24123	-0.267394
1417977_at	9.63236e-13	8.35798	7.91884	0.439139		1456751_x_at	3.07819e-12	5.75796	6.15148	-0.393515		1434846_at	2.43301e-07	5.41836	5.35344	0.0649199
1428997_at	9.70134e-13	4.81916	4.86544	-0.046282		1449305_at	3.10144e-12	5.91197	5.89441	0.017559		1434430_s_at	2.43599e-07	7.51126	7.6988	-0.187536
1446258_at	9.77173e-13	3.63494	3.65155	-0.0166132		1426311_s_at	3.10348e-12	3.73984	3.26529	0.474545		1416052_at	2.44995e-07	8.64514	8.54916	0.095978
1429722_at	1.01275e-12	4.94556	4.98964	-0.044082		1435458_at	3.10721e-12	5.73601	5.75575	-0.0197427		1425706_a_at	2.4758e-07	7.70638	8.1963	-0.489912
1451673_at	1.0268e-12	4.23859	4.24165	-0.00306121		1417263_at	3.13317e-12	5.24007	4.83842	0.40165		1434999_at	2.48024e-07	6.90542	6.83065	0.074769
1435772_at	1.03084e-12	7.51814	8.25964	-0.7415		1459241_at	3.16834e-12	7.25996	7.15113	0.108831		1433555_at	2.48281e-07	6.31374	6.4025	-0.0887657
1452336_at	1.03607e-12	6.299	6.36852	-0.0695202		1417297_at	3.18921e-12	6.58646	6.71161	-0.125155		1455172_at	2.49488e-07	6.702	6.85796	-0.155963
1423955_a_at	1.04416e-12	5.43528	5.28421	0.151073		1450480_a_at	3.1925e-12	6.3482	6.09496	0.253241		1433834_at	2.49748e-07	8.98357	8.5672	0.416378
1456440_s_at	1.04435e-12	6.65221	6.76073	-0.108521		1450747_at	3.23322e-12	5.27882	5.32381	-0.0449906		1431125_a_at	2.51765e-07	9.95225	9.63257	0.319687
1434105_at	1.04436e-12	10.8016	6.7047	4.09691		1455133_s_at	3.26754e-12	3.58075	3.4381	0.142646		1429559_at	2.52572e-07	5.38785	4.84888	0.538971
1429400_at	1.06327e-12	8.63303	7.51012	1.12291		1423267_s_at	3.29415e-12	11.1242	10.4715	0.652688		1456976_at	2.52652e-07	5.19566	5.44892	-0.253261
1433564_at	1.06992e-12	2.9244	2.92358	0.000818664		1449701_at	3.30043e-12	5.44349	5.23156	0.21193		1415796_at	2.53243e-07	6.89264	8.18149	-1.28885
1442380_at	1.07713e-12	4.31951	4.34138	-0.0218751		1447881_x_at	3.32082e-12	5.47676	5.44949	0.027268		1431074_a_at	2.53387e-07	7.37587	7.15392	0.221954
1430135_at	1.07956e-12	7.76418	7.51422	0.249959		1448604_at	3.33366e-12	2.81527	2.82262	-0.00734931		1455318_at	2.54033e-07	8.76136	9.07735	-0.315993
1417877_at	1.1063e-12	8.69953	8.13968	0.559841		1419709_at	3.34369e-12	6.40452	6.4484	-0.0438815		1451393_at	2.56586e-07	9.50115	9.52011	-0.0189596
1424336_at	1.10847e-12	3.39598	3.80999	-0.414013		1449670_x_at	3.36002e-12	8.1055	8.07529	0.0302055		1454198_a_at	2.58871e-07	7.53555	7.65659	-0.121042
1436387_at	1.11885e-12	4.667	4.80383	-0.136829		1450064_at	3.373e-12	4.9482	4.89021	0.0579806		1435077_at	2.59855e-07	8.12483	8.31075	-0.185922
1433966_x_at	1.1218e-12	12.0266	12.2702	-0.243562		1457208_at	3.38559e-12	8.79609	8.43382	0.362264		1425538_x_at	2.60147e-07	6.85897	7.34819	-0.489219
1456065_at	1.15419e-12	5.49	4.72957	0.760436		1427742_a_at	3.40127e-12	4.59307	4.56514	0.0279266		1416657_at	2.60279e-07	8.75198	8.89387	-0.14189
1448905_at	1.15645e-12	5.74322	5.70109	0.0421275		1437146_x_at	3.40767e-12	5.78836	5.92998	-0.141623		1434196_at	2.60286e-07	5.60727	5.58888	0.0183894
1436421_s_at	1.16742e-12	12.2093	12.2989	-0.0896624		1427692_a_at	3.42277e-12	8.20155	8.0026	0.198948		1455659_at	2.60453e-07	7.24231	7.15154	0.090769
1451275_at	1.19183e-12	4.98556	5.04913	-0.0635678		1438427_at	3.46507e-12	13.304	13.5283	-0.224385		1442827_at	2.61308e-07	6.01303	6.08435	-0.0713156
[truncated: 5,539 more rows]
