# Supplementary material for: Gene Expression-Based Classifiers Identify Staphylococcus aureus Infection in Mice and Humans
Source: PLoS One. 2013 Jan 9;8(1):e48979. doi: 10.1371/journal.pone.0048979 (PMC3541361; doi:10.1371/journal.pone.0048979)
Supplement: Table S3 — Probes, ranked by p-value, that were differentially expressed (after Bonferroni correction) in humans with S. aureus infection vs. Healthy controls; S. aureus vs. E. coli infection; and E. coli vs. Healthy controls. Also presented is the average probe expression in each comparator group and the fold-change within the pairwise comparison. (XLSX) [file pone.0048979.s011.xlsx]

## Sheet: Table S3
Table S3. Probes, ranked by p-value, that were differentially expressed (after Bonferroni correction) in humans with S. aureus infection vs. Healthy controls; S. aureus vs. E. coli infection; and E. coli vs. Healthy controls. Also presented is the average probe expression in each comparator group and the fold-change within the pairwise comparison.
S. AUREUS VS. HEALTHY CONTROLS						S. AUREUS VS. E. COLI						E. COLI VS. HEALTHY
Probe ID	P-value	Average S. aureus Expression	Average Healthy Expression	Fold-change		Probe ID	P-value	Average S. aureus Expression	Average E. coli Expression	Fold-change		Probe ID	P-value	Average E. coli Expression	Average Healthy Expression	Fold-change
203234_at	8.30198e-37	11.2296	8.88885	2.34072		NA	NA	NA	NA	NA		203234_at	2.39583e-35	11.4899	8.88885	2.60102
210166_at	3.85893e-36	10.951	8.19595	2.75502								205965_at	4.65101e-30	10.0428	8.33427	1.70852
210948_s_at	3.73343e-34	5.07801	7.51304	-2.43503								204214_s_at	1.3388e-29	11.0472	9.46845	1.57876
203090_at	9.85294e-34	9.44654	8.46846	0.978087								210166_at	5.82489e-29	10.9758	8.19595	2.77985
202524_s_at	4.14975e-33	7.96676	10.6964	-2.72964								205781_at	1.01051e-28	9.07894	7.06289	2.01606
205005_s_at	1.60707e-32	4.6174	7.16422	-2.54681								207982_at	1.98186e-28	7.98123	6.05233	1.9289
217835_x_at	2.93262e-32	12.785	11.6005	1.1845								219669_at	4.29123e-28	12.4518	7.12478	5.32703
206513_at	6.08753e-32	9.59421	6.5238	3.07041								216950_s_at	2.09794e-27	12.4558	8.43344	4.02238
209369_at	1.74942e-31	11.2591	6.91195	4.34711								201356_at	4.38252e-27	9.44347	10.432	-0.988567
218627_at	2.67258e-31	9.46269	7.43729	2.02539								203062_s_at	4.67144e-27	6.03415	7.45895	-1.42481
220034_at	1.17156e-30	9.05967	6.35345	2.70622								211275_s_at	5.02906e-27	12.3746	10.0205	2.35409
201998_at	1.75459e-30	8.68332	10.5241	-1.84073								203090_at	5.04641e-27	9.54397	8.46846	1.07552
205006_s_at	1.82495e-30	4.4977	6.6164	-2.1187								220935_s_at	5.65526e-27	9.98731	7.75496	2.23234
221221_s_at	2.90296e-30	6.28531	7.99776	-1.71245								218627_at	8.34865e-27	9.32923	7.43729	1.89194
200965_s_at	3.16522e-30	8.17542	10.731	-2.55554								212692_s_at	1.36718e-26	7.34698	8.7538	-1.40682
209782_s_at	3.36562e-30	6.34582	8.14781	-1.80199								201934_at	1.38353e-26	9.81581	11.2671	-1.45126
212400_at	4.17376e-30	7.27168	10.0226	-2.75091								218280_x_at	2.38183e-26	12.4589	10.5592	1.89969
216950_s_at	4.30698e-30	12.2421	8.43344	3.80871								212807_s_at	4.62606e-26	9.59071	7.22174	2.36897
221234_s_at	4.39824e-30	5.85454	8.69745	-2.84291								208734_x_at	6.29612e-26	10.0075	9.17025	0.837285
215524_x_at	5.09379e-30	5.58526	7.53767	-1.95241								212056_at	8.5779e-26	6.85697	8.62416	-1.76718
219528_s_at	5.20435e-30	6.64667	9.61442	-2.96775								202521_at	9.25463e-26	8.89484	9.88837	-0.993534
204793_at	5.21235e-30	5.44864	7.58199	-2.13335								201554_x_at	9.28424e-26	12.4169	9.88529	2.53158
219394_at	5.70526e-30	11.2967	9.47318	1.8235								212375_at	9.82044e-26	6.97612	8.17372	-1.1976
206761_at	6.08634e-30	5.77071	8.04033	-2.26962								212538_at	9.86692e-26	5.18795	7.34637	-2.15843
221011_s_at	6.21259e-30	8.0472	10.3063	-2.25911								219394_at	1.14866e-25	11.3239	9.47318	1.85069
221058_s_at	6.85998e-30	10.0615	8.23223	1.82923								214511_x_at	1.22723e-25	12.3551	8.68369	3.67137
221601_s_at	8.71597e-30	9.22158	11.9063	-2.68471								213360_s_at	1.37052e-25	9.50007	10.7303	-1.23025
209840_s_at	1.20988e-29	4.94335	7.68352	-2.74018								219210_s_at	1.62539e-25	8.6622	7.0796	1.58259
218728_s_at	1.26422e-29	8.99203	5.77748	3.21455								201368_at	1.77864e-25	10.3756	12.3264	-1.95076
208858_s_at	1.69014e-29	8.81353	10.7263	-1.91278								204125_at	1.82145e-25	8.92896	7.81527	1.11369
219283_at	2.49614e-29	9.02513	7.03543	1.98971								200953_s_at	1.92852e-25	8.51769	10.48	-1.96232
202523_s_at	2.5317e-29	6.63206	8.20607	-1.57401								201998_at	2.0789e-25	8.83894	10.5241	-1.68512
214511_x_at	3.80971e-29	12.2196	8.68369	3.53595								209369_at	2.10679e-25	11.2383	6.91195	4.32635
221602_s_at	5.48982e-29	8.12003	10.7633	-2.64326								206440_at	2.71089e-25	7.74817	5.86713	1.88105
221558_s_at	5.79549e-29	8.34841	11.4599	-3.11144								208827_at	2.81808e-25	9.9618	8.94652	1.01529
217822_at	8.24332e-29	8.72221	9.96175	-1.23954								206513_at	3.85089e-25	9.5428	6.5238	3.019
203685_at	1.33253e-28	6.54299	8.73447	-2.19148								217835_x_at	4.53773e-25	12.8396	11.6005	1.23919
203717_at	1.39627e-28	5.94444	7.69649	-1.75205								200983_x_at	4.87029e-25	10.4252	8.13517	2.29
203413_at	1.4614e-28	6.65684	9.60024	-2.9434								203445_s_at	4.98594e-25	10.3157	11.2753	-0.959575
207826_s_at	1.8292e-28	5.7779	7.29612	-1.51823								213039_at	6.58491e-25	10.7139	11.9893	-1.27546
219210_s_at	1.86554e-28	8.70062	7.0796	1.62101								212789_at	7.16205e-25	6.50906	7.31981	-0.810748
211478_s_at	1.99437e-28	4.54416	6.74071	-2.19655								212288_at	8.21761e-25	10.7394	11.7233	-0.983883
200815_s_at	2.06419e-28	9.8434	9.03921	0.804195								218764_at	9.34452e-25	8.54855	10.2286	-1.68004
202479_s_at	2.12914e-28	5.36761	7.27572	-1.90811								204232_at	9.91267e-25	13.5439	12.249	1.29489
213054_at	2.40022e-28	4.61042	5.79474	-1.18432								202524_s_at	1.13439e-24	8.30641	10.6964	-2.38998
205255_x_at	2.62924e-28	10.0033	12.2067	-2.20339								207500_at	1.28056e-24	9.57451	6.80892	2.76559
209671_x_at	3.15762e-28	9.6475	12.249	-2.60146								200760_s_at	1.36444e-24	11.3444	10.4142	0.930199
203371_s_at	3.45321e-28	9.8132	7.42957	2.38364								208858_s_at	1.68779e-24	8.85049	10.7263	-1.87581
210972_x_at	3.46965e-28	10.0139	12.7888	-2.77486								214290_s_at	1.94776e-24	13.2106	11.6508	1.55983
210038_at	3.57735e-28	7.28987	9.19911	-1.90924								205698_s_at	1.98939e-24	9.08415	7.19625	1.8879
217995_at	3.69822e-28	12.6194	11.4541	1.16527								218754_at	2.24126e-24	8.01091	9.21572	-1.20482
217394_at	4.54668e-28	4.81397	7.173	-2.35903								213302_at	2.56561e-24	5.37561	7.08511	-1.7095
207565_s_at	5.09382e-28	8.00123	6.48184	1.51938								200737_at	2.77621e-24	11.0326	9.72491	1.30769
218918_at	5.37445e-28	5.99372	8.30085	-2.30713								212268_at	2.96897e-24	11.9819	9.99077	1.99113
212807_s_at	6.26635e-28	9.62821	7.22174	2.40646								208470_s_at	3.42803e-24	10.3415	6.12178	4.21971
205863_at	6.27896e-28	13.519	10.0967	3.4223								209014_at	3.5779e-24	7.4133	8.84058	-1.42728
204232_at	7.33564e-28	13.5071	12.249	1.25807								200073_s_at	3.61528e-24	9.80378	10.8593	-1.05549
219669_at	8.00231e-28	12.2446	7.12478	5.11977								209330_s_at	3.66544e-24	8.57363	9.86307	-1.28944
206584_at	8.23136e-28	10.2976	7.16145	3.13615								215537_x_at	3.6843e-24	9.63786	8.0453	1.59255
217412_at	8.86136e-28	5.56935	7.34756	-1.77821								206584_at	3.97979e-24	9.94548	7.16145	2.78403
218333_at	8.93797e-28	9.74183	8.76389	0.977935								216951_at	5.12927e-24	5.30103	4.38252	0.918516
210031_at	9.4442e-28	8.99044	11.3687	-2.37823								220099_s_at	5.64779e-24	8.06893	9.1151	-1.04617
221757_at	9.78192e-28	8.08809	9.66901	-1.58091								208931_s_at	7.22929e-24	6.48636	7.89253	-1.40617
201172_x_at	1.07335e-27	12.5855	11.8263	0.759128								212690_at	7.43414e-24	5.34445	7.19624	-1.85179
200620_at	1.09545e-27	11.8848	10.8081	1.07674								219014_at	7.46426e-24	13.3191	11.7027	1.6164
209604_s_at	1.09589e-27	7.78451	10.0893	-2.30475								218189_s_at	7.81599e-24	9.51167	8.41421	1.09745
205456_at	1.214e-27	7.76881	10.3162	-2.54741								213703_at	8.53836e-24	5.65473	7.30314	-1.64841
203535_at	1.32207e-27	14.8086	13.9105	0.898086								203831_at	8.54591e-24	8.58097	9.31061	-0.729631
209623_at	1.64724e-27	7.2311	8.51043	-1.27934								203959_s_at	9.03149e-24	7.67291	8.52867	-0.855759
210039_s_at	1.64915e-27	6.73032	8.42405	-1.69373								217518_at	9.80318e-24	6.59404	5.38219	1.21185
208644_at	1.73502e-27	7.75295	9.01681	-1.26386								211067_s_at	1.05621e-23	10.5998	8.7525	1.84725
214771_x_at	2.14993e-27	8.26673	9.55901	-1.29228								202262_x_at	1.17196e-23	9.58397	8.0025	1.58147
209670_at	2.30116e-27	9.34585	11.9071	-2.56125								217822_at	1.56723e-23	8.74159	9.96175	-1.22015
209504_s_at	2.7735e-27	5.63727	7.54467	-1.9074								206761_at	1.58131e-23	5.81556	8.04033	-2.22477
205254_x_at	3.24769e-27	6.1016	8.54364	-2.44205								221481_x_at	1.79144e-23	10.2653	11.3388	-1.07346
200983_x_at	3.38921e-27	10.5164	8.13517	2.38124								221221_s_at	1.96678e-23	6.39452	7.99776	-1.60324
212692_s_at	3.87816e-27	7.4387	8.7538	-1.3151								203413_at	2.17778e-23	6.84249	9.60024	-2.75774
219129_s_at	3.95677e-27	8.10819	6.96964	1.13855								219528_s_at	2.22343e-23	6.80819	9.61442	-2.80623
209014_at	3.97302e-27	7.45444	8.84058	-1.38614								220941_s_at	2.24746e-23	7.43007	6.13225	1.29782
209841_s_at	4.21796e-27	4.87327	7.1751	-2.30183								219938_s_at	2.50703e-23	10.586	8.25895	2.32709
203959_s_at	4.22963e-27	7.64986	8.52867	-0.878816								203247_s_at	2.51261e-23	9.82123	8.73735	1.08388
219870_at	4.28548e-27	6.75536	7.86662	-1.11125								209882_at	3.17898e-23	9.0482	7.43149	1.61671
213958_at	4.50137e-27	8.28132	10.1251	-1.84373								222243_s_at	3.47479e-23	6.73106	8.12549	-1.39442
200953_s_at	5.00174e-27	8.48455	10.48	-1.99545								217884_at	3.7437e-23	7.4207	8.66213	-1.24143
211902_x_at	5.17075e-27	9.59428	12.1829	-2.58864								217769_s_at	4.23775e-23	10.9445	9.95226	0.992271
203716_s_at	5.29447e-27	5.63843	7.04656	-1.40812								208798_x_at	4.85805e-23	6.67497	9.07016	-2.39519
202917_s_at	5.3658e-27	14.6116	12.9285	1.68314								220034_at	5.14267e-23	8.96285	6.35345	2.6094
218280_x_at	5.61938e-27	12.242	10.5592	1.68277								214771_x_at	5.76545e-23	8.42844	9.55901	-1.13057
219734_at	6.0214e-27	6.4535	8.33943	-1.88593								210425_x_at	5.78593e-23	6.75726	8.87931	-2.12205
217838_s_at	6.20936e-27	9.4146	11.2882	-1.87356								211951_at	6.25977e-23	7.84324	9.28123	-1.43799
201853_s_at	6.44231e-27	8.81244	10.7177	-1.90522								201128_s_at	6.65694e-23	9.15014	10.0001	-0.849961
206440_at	7.39578e-27	7.75882	5.86713	1.89169								201074_at	7.51335e-23	8.70146	9.49345	-0.791983
212429_s_at	7.64549e-27	8.6596	9.57502	-0.915424								212232_at	7.6378e-23	7.97351	9.32545	-1.35194
221790_s_at	8.74363e-27	8.0793	10.095	-2.01568								207625_s_at	8.05277e-23	6.54142	7.36342	-0.822001
200984_s_at	8.85432e-27	10.6743	8.63331	2.04101								205291_at	8.60258e-23	8.554	10.7577	-2.2037
208659_at	9.15988e-27	12.7449	11.1572	1.58766								200058_s_at	8.90118e-23	9.81153	10.9424	-1.13085
221756_at	9.33238e-27	8.61666	10.5032	-1.88656								205006_s_at	9.35481e-23	4.55689	6.6164	-2.05951
215044_s_at	9.40665e-27	7.72023	6.48887	1.23137								217995_at	9.48278e-23	12.5844	11.4541	1.13032
214290_s_at	9.86232e-27	13.0698	11.6508	1.41899								219283_at	1.00895e-22	8.80002	7.03543	1.76459
204366_s_at	1.02479e-26	8.82604	9.71537	-0.889328								221597_s_at	1.13328e-22	8.88552	8.01691	0.868605
205781_at	1.09003e-26	9.01518	7.06289	1.9523								211561_x_at	1.13345e-22	10.5799	8.92287	1.65699
201529_s_at	1.13258e-26	8.48165	9.84696	-1.36531								214748_at	1.16374e-22	8.22609	6.90344	1.32265
214733_s_at	1.17616e-26	9.81622	8.82006	0.996158								209815_at	1.22845e-22	4.44328	6.68515	-2.24187
211275_s_at	1.28525e-26	12.3458	10.0205	2.32526								205005_s_at	1.33089e-22	4.78	7.16422	-2.38422
205681_at	1.29813e-26	10.0862	6.34019	3.746								202813_at	1.45331e-22	7.27047	8.47132	-1.20085
215796_at	1.36796e-26	4.19419	5.84638	-1.65219								41220_at	1.48946e-22	11.2364	12.5588	-1.32236
201528_at	1.64573e-26	9.40147	10.6824	-1.28096								221011_s_at	1.55702e-22	8.34026	10.3063	-1.96605
201675_at	1.6934e-26	6.6641	7.93521	-1.27112								218773_s_at	1.57431e-22	11.0198	9.37022	1.64959
218754_at	1.92084e-26	7.94846	9.21572	-1.26727								201538_s_at	1.66521e-22	6.79738	5.11988	1.67749
219607_s_at	1.98585e-26	9.59166	5.39042	4.20124								214909_s_at	2.01974e-22	9.53461	7.97473	1.55988
204214_s_at	1.99841e-26	10.8408	9.46845	1.37238								212071_s_at	2.04452e-22	8.6087	10.4503	-1.84157
220485_s_at	2.32225e-26	6.26176	8.48602	-2.22427								211306_s_at	2.08764e-22	6.95981	4.62352	2.33629
212268_at	2.35501e-26	12.0027	9.99077	2.01194								219451_at	2.19608e-22	9.16198	7.4003	1.76169
202207_at	2.4852e-26	8.27404	10.4028	-2.12872								203580_s_at	2.2004e-22	8.21445	9.79406	-1.5796
212197_x_at	2.51999e-26	7.82194	9.06395	-1.24201								219757_s_at	2.2244e-22	9.84789	8.06401	1.78388
205353_s_at	2.88732e-26	7.4224	8.91043	-1.48803								221558_s_at	2.51843e-22	8.78196	11.4599	-2.6779
204861_s_at	2.99088e-26	9.85379	7.71931	2.13447								200909_s_at	2.78816e-22	12.9835	13.8847	-0.901185
202968_s_at	3.21724e-26	6.78031	8.30278	-1.52246								204744_s_at	2.89711e-22	8.41375	9.61509	-1.20134
219316_s_at	3.39165e-26	8.69141	6.94612	1.7453								219906_at	3.18979e-22	9.40049	8.18231	1.21817
222303_at	3.55549e-26	10.1645	8.38294	1.78154								200040_at	3.38616e-22	9.53422	10.7125	-1.1783
208073_x_at	3.59205e-26	8.54637	10.2319	-1.68553								210156_s_at	3.46009e-22	9.33884	8.03354	1.30529
201361_at	4.25586e-26	8.11024	9.2359	-1.12565								207565_s_at	3.55703e-22	7.81406	6.48184	1.33221
211005_at	4.28011e-26	7.91863	9.82229	-1.90366								212197_x_at	3.65094e-22	7.98977	9.06395	-1.07419
207072_at	4.55153e-26	12.1745	9.72051	2.45402								200016_x_at	3.67591e-22	11.8104	12.7669	-0.956564
210645_s_at	4.57759e-26	7.98109	9.93668	-1.95559								203342_at	3.90752e-22	8.89762	8.09491	0.802708
57082_at	4.71684e-26	8.98186	10.9759	-1.99404								222303_at	3.91619e-22	10.1961	8.38294	1.81315
209602_s_at	5.66462e-26	4.63081	6.65243	-2.02162								209393_s_at	4.01231e-22	8.93774	8.22811	0.709628
212846_at	5.69631e-26	7.54457	9.05438	-1.50982								218306_s_at	4.04372e-22	8.89274	9.93354	-1.0408
209174_s_at	5.98611e-26	8.60776	9.4673	-0.859544								201648_at	4.44941e-22	11.486	12.3102	-0.824159
210825_s_at	6.6769e-26	7.5988	9.19377	-1.59497								210449_x_at	4.59252e-22	10.5798	8.92328	1.65648
205965_at	6.94674e-26	9.81243	8.33427	1.47816								219607_s_at	4.67362e-22	9.41795	5.39042	4.02754
209994_s_at	7.06873e-26	4.64771	5.88389	-1.23618								202905_x_at	4.72441e-22	8.85302	7.38249	1.47053
206983_at	7.64288e-26	5.77507	7.43119	-1.65611								202584_at	4.74005e-22	7.17955	8.00955	-0.83
207460_at	7.98214e-26	6.35329	8.20232	-1.84903								206697_s_at	4.98397e-22	10.7368	6.72073	4.01606
205929_at	8.27434e-26	6.23737	7.23187	-0.994499								201225_s_at	5.04949e-22	9.49595	10.6447	-1.1487
202478_at	8.37365e-26	6.95015	9.19243	-2.24228								201697_s_at	5.22009e-22	7.54765	9.15482	-1.60717
203846_at	9.27202e-26	5.91222	6.96991	-1.05769								201555_at	5.5482e-22	7.39313	8.57451	-1.18138
217884_at	9.30941e-26	7.40174	8.66213	-1.26039								214733_s_at	5.68369e-22	9.87684	8.82006	1.05678
211392_s_at	9.36102e-26	5.89662	6.65198	-0.755365								204372_s_at	5.74716e-22	7.409	8.58203	-1.17303
211067_s_at	1.00784e-25	10.4994	8.7525	1.74693								221937_at	5.89589e-22	9.15207	10.0369	-0.884882
218648_at	1.17528e-25	9.22216	10.3543	-1.13212								218932_at	6.06644e-22	5.60574	7.31107	-1.70533
203408_s_at	1.3288e-25	10.3655	11.5676	-1.20212								202230_s_at	6.20916e-22	8.25007	9.56202	-1.31195
206662_at	1.3346e-25	10.7386	9.33652	1.4021								219192_at	6.34846e-22	6.82321	8.26707	-1.44386
214042_s_at	1.45744e-25	9.36745	10.9331	-1.56569								205681_at	6.47046e-22	9.69104	6.34019	3.35086
201778_s_at	1.50547e-25	9.83166	10.5663	-0.734604								212808_at	6.70311e-22	6.24216	7.1653	-0.923139
214945_at	1.82985e-25	5.26186	7.03677	-1.77491								212139_at	6.87873e-22	7.34881	8.50657	-1.15776
208713_at	1.84295e-25	9.6863	10.5061	-0.819782								202347_s_at	7.12143e-22	9.27524	8.67602	0.599227
214748_at	2.00893e-25	8.45508	6.90344	1.55164								209604_s_at	7.67046e-22	7.9628	10.0893	-2.12646
205038_at	2.03149e-25	8.94501	9.66886	-0.72385								212673_at	8.03284e-22	7.60076	8.50108	-0.900324
219938_s_at	2.04192e-25	10.5591	8.25895	2.30016								213356_x_at	8.69247e-22	11.6102	12.5005	-0.890292
218325_s_at	2.17958e-25	7.68615	8.5348	-0.848648								203685_at	8.95347e-22	6.7272	8.73447	-2.00727
206150_at	2.19081e-25	8.35922	10.8101	-2.45091								203298_s_at	9.1237e-22	8.73181	10.2788	-1.54702
206828_at	2.40695e-25	6.39123	8.39292	-2.00169								212017_at	9.13521e-22	8.53939	9.3574	-0.818017
210140_at	2.64275e-25	13.1288	11.2115	1.9173								217527_s_at	9.19728e-22	8.66543	9.72906	-1.06363
200060_s_at	2.76902e-25	10.2344	11.0325	-0.798074								204102_s_at	9.27384e-22	12.5196	13.6606	-1.14099
212808_at	2.87409e-25	6.13339	7.1653	-1.03192								209174_s_at	1.00405e-21	8.62647	9.4673	-0.840826
212599_at	2.88961e-25	6.05718	8.35899	-2.30181								215641_at	1.06669e-21	5.55136	4.36296	1.1884
218575_at	3.02013e-25	7.13535	8.16866	-1.03331								204520_x_at	1.0717e-21	6.92508	8.4206	-1.49552
200694_s_at	3.27736e-25	8.84051	10.1077	-1.26722								209782_s_at	1.07891e-21	6.64092	8.14781	-1.50689
209368_at	3.58506e-25	5.85827	7.60735	-1.74909								203774_at	1.09924e-21	5.57093	7.21133	-1.6404
35147_at	3.61149e-25	6.10675	6.82206	-0.71531								212144_at	1.19835e-21	9.37852	10.2698	-0.891312
203127_s_at	3.99047e-25	10.2053	8.75146	1.45384								200644_at	1.21109e-21	9.19583	10.5413	-1.34548
211893_x_at	4.04333e-25	6.17244	7.77695	-1.60451								200984_s_at	1.2228e-21	10.5863	8.63331	1.95299
216342_x_at	4.14544e-25	11.2207	12.5486	-1.32783								202642_s_at	1.25909e-21	7.49791	8.71143	-1.21352
216133_at	4.14946e-25	5.87463	7.45825	-1.58362								212237_at	1.27905e-21	7.48196	8.44511	-0.963152
206485_at	4.17656e-25	7.01468	8.4576	-1.44291								200663_at	1.41795e-21	12.8721	11.7813	1.09083
200985_s_at	4.34951e-25	10.4512	8.47086	1.98038								219129_s_at	1.45143e-21	8.13833	6.96964	1.16869
212538_at	4.55844e-25	5.23164	7.34637	-2.11473								221277_s_at	1.46978e-21	8.20095	7.01502	1.18594
213360_s_at	4.6786e-25	9.56415	10.7303	-1.16618								203579_s_at	1.49557e-21	6.13563	7.48658	-1.35095
203580_s_at	4.75695e-25	8.13238	9.79406	-1.66168								200694_s_at	1.5217e-21	8.85564	10.1077	-1.25209
205936_s_at	5.11908e-25	11.8127	9.86093	1.95173								214280_x_at	1.62949e-21	9.08687	10.2824	-1.19557
209882_at	5.20214e-25	9.00422	7.43149	1.57273								200094_s_at	1.87521e-21	12.3583	13.5449	-1.18661
211874_s_at	5.26747e-25	6.02647	6.97773	-0.951261								202968_s_at	1.8921e-21	6.87971	8.30278	-1.42307
211339_s_at	5.64524e-25	7.77725	10.3666	-2.58933								218333_at	2.02203e-21	9.68151	8.76389	0.917617
221501_x_at	6.39759e-25	10.2066	11.5578	-1.35118								201853_s_at	2.06918e-21	9.05723	10.7177	-1.66043
209870_s_at	6.52045e-25	7.68268	8.82248	-1.13979								207681_at	2.12038e-21	5.92708	7.3376	-1.41052
221726_at	6.68881e-25	9.0075	10.7061	-1.69858								212709_at	2.18925e-21	5.45926	7.12839	-1.66913
208758_at	7.87613e-25	7.78591	9.23676	-1.45085								211478_s_at	2.23945e-21	4.84067	6.74071	-1.90004
213269_at	8.43306e-25	5.49685	6.45205	-0.955201								200942_s_at	2.34492e-21	9.6359	8.23385	1.40204
212414_s_at	9.51511e-25	8.77987	10.2393	-1.45947								205690_s_at	2.40821e-21	9.75139	9.01737	0.734021
217969_at	9.64134e-25	9.73446	10.9944	-1.25996								218284_at	2.70898e-21	7.2334	8.33703	-1.10363
218237_s_at	9.66974e-25	8.74037	10.589	-1.84865								219433_at	2.85971e-21	5.44427	6.70063	-1.25636
205896_at	1.06161e-24	10.9732	9.23238	1.74077								204881_s_at	2.87089e-21	10.3169	7.85219	2.46472
41220_at	1.07257e-24	11.2543	12.5588	-1.3045								201421_s_at	2.89408e-21	7.16149	7.81639	-0.654904
209431_s_at	1.12205e-24	6.919	8.26031	-1.34131								213090_s_at	2.89511e-21	6.48946	8.13773	-1.64827
204352_at	1.14665e-24	7.18673	9.19998	-2.01326								212074_at	2.91076e-21	6.86297	8.63049	-1.76752
209815_at	1.2419e-24	4.65676	6.68515	-2.02839								202206_at	2.91413e-21	7.46149	9.31965	-1.85816
209440_at	1.25969e-24	7.87758	8.83766	-0.960082								209514_s_at	3.16301e-21	10.5365	9.20898	1.32756
202789_at	1.3565e-24	7.17924	8.89489	-1.71565								218918_at	3.18e-21	6.12004	8.30085	-2.18081
217099_s_at	1.36426e-24	6.86073	7.58251	-0.721788								200687_s_at	3.19622e-21	7.96738	9.1404	-1.17303
204891_s_at	1.38073e-24	9.46234	11.7847	-2.32231								202224_at	3.22692e-21	9.45214	8.55844	0.893698
204773_at	1.39033e-24	6.33101	7.8951	-1.5641								209054_s_at	3.25326e-21	6.36051	7.14806	-0.787547
203130_s_at	1.74816e-24	5.59452	6.56952	-0.975004								202207_at	3.31733e-21	8.27532	10.4028	-2.12743
200094_s_at	1.76546e-24	12.2467	13.5449	-1.2982								202188_at	3.6906e-21	7.47087	8.67541	-1.20454
204153_s_at	1.82977e-24	9.21743	10.3889	-1.1715								215044_s_at	3.75309e-21	7.71648	6.48887	1.22761
211715_s_at	1.85579e-24	6.22672	7.22688	-1.00016								200708_at	3.7952e-21	8.30808	9.42566	-1.11758
220418_at	1.8649e-24	6.49177	8.60377	-2.11201								208834_x_at	3.85171e-21	13.728	14.3476	-0.619601
204890_s_at	1.87014e-24	8.191	10.5841	-2.39305								203717_at	4.02503e-21	5.98287	7.69649	-1.71362
214280_x_at	1.91052e-24	9.04364	10.2824	-1.23879								213988_s_at	4.39898e-21	12.1949	10.8404	1.35445
211584_s_at	1.94722e-24	6.487	7.38833	-0.901331								203380_x_at	4.51432e-21	9.33973	10.6426	-1.30287
206099_at	1.94942e-24	7.6645	9.05622	-1.39172								200620_at	4.52206e-21	11.7854	10.8081	0.977332
218667_at	2.03019e-24	7.94751	9.02911	-1.08159								212124_at	4.79068e-21	8.90254	10.4021	-1.49955
202191_s_at	2.03679e-24	10.6207	8.98172	1.63903								202754_at	4.8498e-21	7.30308	8.28867	-0.985597
202431_s_at	2.03708e-24	8.4958	10.3546	-1.85885								213153_at	5.30345e-21	10.3174	11.0969	-0.779504
218764_at	2.08369e-24	8.44534	10.2286	-1.78325								209602_s_at	5.47296e-21	4.67546	6.65243	-1.97697
204125_at	2.10615e-24	8.9082	7.81527	1.09293								209431_s_at	5.57286e-21	6.93437	8.26031	-1.32594
207180_s_at	2.12315e-24	9.59176	8.59594	0.995817								205323_s_at	5.60106e-21	9.65529	8.3579	1.29739
212229_s_at	2.17352e-24	7.35208	8.75895	-1.40687								203759_at	5.6503e-21	7.27352	5.99196	1.28157
209494_s_at	2.29943e-24	6.64298	7.61568	-0.972691								209702_at	5.82583e-21	7.53851	8.92082	-1.38231
210625_s_at	2.42295e-24	5.753	6.72949	-0.97649								210972_x_at	6.06349e-21	10.5369	12.7888	-2.25194
201554_x_at	2.46512e-24	12.2332	9.88529	2.34792								203286_at	6.24586e-21	10.087	11.1685	-1.08151
206114_at	2.59938e-24	5.54092	6.56092	-1.02001								210645_s_at	6.76193e-21	8.199	9.93668	-1.73768
212313_at	2.66517e-24	8.64853	9.70164	-1.0531								209276_s_at	6.91289e-21	9.9436	7.84429	2.09931
202499_s_at	2.69487e-24	12.3895	10.7207	1.66886								200815_s_at	7.29011e-21	9.80965	9.03921	0.770447
203437_at	2.82713e-24	8.4904	7.87828	0.612115								202479_s_at	7.44492e-21	5.62544	7.27572	-1.65027
205323_s_at	2.85075e-24	9.59686	8.3579	1.23896								212812_at	7.77123e-21	7.92973	9.31776	-1.38803
202481_at	2.94057e-24	6.55508	8.19187	-1.63679								204143_s_at	8.79566e-21	6.42581	7.88669	-1.46089
215537_x_at	2.95549e-24	9.60036	8.0453	1.55505								210142_x_at	8.82236e-21	12.4422	11.0355	1.40667
213703_at	3.04482e-24	5.42234	7.30314	-1.8808								203012_x_at	9.17057e-21	13.4613	14.2128	-0.751479
207500_at	3.07109e-24	9.43003	6.80892	2.62111								208773_s_at	9.25175e-21	9.48005	10.3309	-0.850897
203264_s_at	3.1454e-24	5.53541	6.72595	-1.19054								204793_at	9.79946e-21	5.61257	7.58199	-1.96942
202262_x_at	3.15747e-24	9.5545	8.0025	1.552								213619_at	1.0669e-20	10.8871	12.0961	-1.20901
208113_x_at	3.20663e-24	12.2985	13.1011	-0.802587								212463_at	1.09101e-20	10.0989	8.33327	1.76566
213193_x_at	3.26278e-24	10.6821	13.0203	-2.33823								212693_at	1.10519e-20	6.62487	7.80216	-1.17728
214870_x_at	3.50046e-24	9.58644	10.8556	-1.26913								212846_at	1.14439e-20	7.64347	9.05438	-1.41092
219014_at	3.72465e-24	13.3009	11.7027	1.59822								208659_at	1.15639e-20	12.7046	11.1572	1.54734
220935_s_at	4.31268e-24	9.7833	7.75496	2.02834								220999_s_at	1.16817e-20	7.93811	9.24362	-1.30551
206337_at	4.42809e-24	8.28454	10.9889	-2.70436								212653_s_at	1.216e-20	5.98147	7.0739	-1.09243
211951_at	4.46995e-24	7.98216	9.28123	-1.29907								206025_s_at	1.23366e-20	12.0074	8.32714	3.68029
200057_s_at	4.49029e-24	11.1351	12.0837	-0.948585								201172_x_at	1.24455e-20	12.5347	11.8263	0.708354
208864_s_at	4.57882e-24	10.3573	8.11868	2.23864								219690_at	1.2784e-20	10.3624	9.20887	1.15355
210915_x_at	4.65569e-24	10.0068	12.3429	-2.3361								212429_s_at	1.28106e-20	8.65269	9.57502	-0.922337
210609_s_at	4.69919e-24	8.30358	6.40757	1.89602								218237_s_at	1.28261e-20	9.09464	10.589	-1.49438
217527_s_at	4.96207e-24	8.72854	9.72906	-1.00052								208073_x_at	1.33201e-20	8.73231	10.2319	-1.49959
205798_at	5.00747e-24	9.95397	12.2324	-2.27843								213054_at	1.54776e-20	4.66094	5.79474	-1.1338
219700_at	5.13691e-24	4.97768	6.61797	-1.64029								213657_s_at	1.60953e-20	6.18274	7.23285	-1.05012
39248_at	5.15119e-24	7.18553	9.68884	-2.50331								211902_x_at	1.62878e-20	10.0496	12.1829	-2.13336
201538_s_at	5.28979e-24	6.74092	5.11988	1.62104								210038_at	1.64273e-20	7.45334	9.19911	-1.74577
221081_s_at	5.58748e-24	9.30475	10.6193	-1.31455								210191_s_at	1.66712e-20	7.51801	5.84373	1.67428
213534_s_at	5.67375e-24	6.12744	8.35623	-2.22879								201528_at	1.66843e-20	9.25468	10.6824	-1.42775
209871_s_at	5.67929e-24	6.69744	8.34837	-1.65093								220690_s_at	1.69898e-20	8.62831	7.81853	0.809784
205698_s_at	5.72827e-24	9.25422	7.19625	2.05797								221234_s_at	1.84953e-20	6.42843	8.69745	-2.26902
218312_s_at	5.74337e-24	7.19048	8.7459	-1.55542								215460_x_at	1.87545e-20	6.96761	8.34279	-1.37518
219161_s_at	5.90898e-24	10.8598	9.10139	1.75843								208644_at	1.87878e-20	7.72606	9.01681	-1.29075
214909_s_at	6.43896e-24	9.54857	7.97473	1.57384								221081_s_at	1.9599e-20	9.54607	10.6193	-1.07324
201999_s_at	6.45727e-24	11.8826	10.2466	1.63597								213725_x_at	2.06069e-20	6.6136	8.09744	-1.48384
211938_at	6.5178e-24	10.1032	11.3289	-1.22561								221492_s_at	2.08051e-20	11.2536	10.0565	1.19711
211955_at	6.51828e-24	7.26551	8.1569	-0.891391								206544_x_at	2.1216e-20	7.19392	8.41299	-1.21907
216863_s_at	6.71181e-24	6.78482	8.19328	-1.40846								217513_at	2.32369e-20	7.20341	5.71644	1.48697
207734_at	6.99028e-24	6.75119	8.08319	-1.332								206015_s_at	2.4953e-20	8.55994	9.47333	-0.913386
204744_s_at	7.02921e-24	8.3218	9.61509	-1.29329								209671_x_at	2.53684e-20	10.1456	12.249	-2.10335
215823_x_at	7.02982e-24	11.8028	12.6247	-0.821948								211938_at	2.54289e-20	10.191	11.3289	-1.13788
206980_s_at	7.1587e-24	6.0931	7.64218	-1.54908								213084_x_at	2.60373e-20	13.6556	14.3804	-0.724769
201761_at	7.17305e-24	9.44454	7.14609	2.29845								201470_at	2.6069e-20	11.5358	10.1891	1.3467
207681_at	7.29868e-24	5.91224	7.3376	-1.42536								64418_at	2.60757e-20	8.92182	9.79932	-0.877498
200942_s_at	8.35152e-24	9.61625	8.23385	1.3824								219477_s_at	2.61607e-20	5.61413	6.6571	-1.04297
218149_s_at	1.04048e-23	6.97185	8.71035	-1.7385								218409_s_at	2.65762e-20	7.89557	7.13453	0.761043
216945_x_at	1.07693e-23	5.83283	8.01149	-2.17866								201726_at	2.76049e-20	9.54997	10.402	-0.852046
201356_at	1.09462e-23	9.5519	10.432	-0.880146								210039_s_at	2.8474e-20	6.8353	8.42405	-1.58875
211270_x_at	1.25092e-23	9.77329	10.5855	-0.812197								218882_s_at	2.87334e-20	6.17135	7.3063	-1.13495
204538_x_at	1.25756e-23	9.84776	11.2101	-1.36236								202864_s_at	2.96584e-20	10.2503	9.2948	0.95548
217769_s_at	1.32113e-23	11.0195	9.95226	1.06728								210160_at	3.04964e-20	5.8746	5.17508	0.699519
204102_s_at	1.32166e-23	12.4126	13.6606	-1.24793								210948_s_at	3.05005e-20	5.43849	7.51304	-2.07455
212693_at	1.3574e-23	6.64173	7.80216	-1.16043								211685_s_at	3.09052e-20	5.90466	7.20086	-1.2962
200610_s_at	1.35858e-23	9.82302	10.8086	-0.985547								217591_at	3.27337e-20	8.00933	6.40732	1.60201
205259_at	1.40631e-23	4.62115	5.904	-1.28285								208117_s_at	3.28981e-20	7.77152	8.53908	-0.767556
203732_at	1.43887e-23	9.19516	8.23396	0.961199								219662_at	3.31657e-20	6.33221	5.65657	0.675637
218011_at	1.47957e-23	10.4657	8.89462	1.57107								55872_at	3.31716e-20	5.66208	7.24448	-1.5824
203431_s_at	1.53589e-23	5.29422	6.41877	-1.12455								201054_at	3.44366e-20	8.16911	9.66616	-1.49705
211306_s_at	1.58143e-23	6.78815	4.62352	2.16463								200060_s_at	3.53423e-20	10.3131	11.0325	-0.719331
55872_at	1.62818e-23	5.79122	7.24448	-1.45326								208825_x_at	3.54868e-20	13.6303	14.3161	-0.685829
205322_s_at	1.76987e-23	9.56289	8.3343	1.22859								202592_at	3.54935e-20	10.4778	9.07475	1.403
202872_at	1.84955e-23	8.54267	6.1841	2.35857								216316_x_at	3.63982e-20	8.84555	6.96036	1.88519
213340_s_at	1.85082e-23	6.8604	7.9603	-1.0999								203716_s_at	3.70398e-20	5.7274	7.04656	-1.31916
211941_s_at	1.8832e-23	8.63024	10.0295	-1.39923								202466_at	3.7494e-20	7.97342	9.04752	-1.0741
200663_at	1.93814e-23	12.8707	11.7813	1.0894								211715_s_at	3.77918e-20	6.36086	7.22688	-0.866018
202592_at	1.997e-23	10.6412	9.07475	1.56645								221058_s_at	3.96438e-20	9.94973	8.23223	1.7175
204197_s_at	2.01777e-23	8.55939	10.2685	-1.70916								221973_at	4.04233e-20	5.22042	6.69768	-1.47726
215177_s_at	2.04368e-23	5.63352	7.30587	-1.67235								200811_at	4.04956e-20	8.32496	9.73675	-1.41179
221270_s_at	2.13814e-23	5.93282	6.88259	-0.94977								214221_at	4.05932e-20	5.29854	6.32385	-1.02531
209276_s_at	2.15442e-23	10.0622	7.84429	2.21794								218728_s_at	4.24865e-20	8.59333	5.77748	2.81585
211796_s_at	2.36711e-23	10.177	12.5816	-2.40464								212485_at	4.25499e-20	7.88799	8.82801	-0.94002
41577_at	2.36895e-23	7.012	8.65878	-1.64678								215977_x_at	4.30818e-20	9.66994	7.65155	2.0184
202723_s_at	2.39745e-23	8.53735	9.80888	-1.27153								200957_s_at	4.44514e-20	7.59957	8.61287	-1.0133
207625_s_at	2.43242e-23	6.60651	7.36342	-0.756912								210555_s_at	4.77053e-20	8.34068	9.72004	-1.37936
218440_at	2.5041e-23	7.27176	8.224	-0.952233								210031_at	4.78109e-20	9.2855	11.3687	-2.08317
211900_x_at	2.54841e-23	7.04286	8.22147	-1.17862								221493_at	5.00315e-20	8.88652	10.1174	-1.23089
219110_at	2.62303e-23	7.07281	7.95031	-0.877503								202191_s_at	5.06738e-20	10.634	8.98172	1.65225
212276_at	2.8037e-23	7.32557	8.59428	-1.2687								204197_s_at	5.11633e-20	8.6499	10.2685	-1.61865
213039_at	2.90338e-23	10.7843	11.9893	-1.20502								211105_s_at	5.15357e-20	7.71468	8.85536	-1.14068
205291_at	2.94176e-23	8.67838	10.7577	-2.07933								206420_at	5.17185e-20	10.5824	9.14106	1.44132
202206_at	3.05633e-23	7.01427	9.31965	-2.30538								214269_at	5.28846e-20	6.66411	5.62455	1.03956
212231_at	3.23452e-23	7.11371	8.16875	-1.05504								208749_x_at	5.70654e-20	12.482	11.1163	1.36574
203272_s_at	3.25157e-23	8.71787	7.90758	0.810289								203437_at	5.82113e-20	8.5838	7.87828	0.705521
215967_s_at	3.31385e-23	7.54575	9.20813	-1.66239								212991_at	5.87392e-20	7.94913	6.67335	1.27578
209514_s_at	3.62366e-23	10.5709	9.20898	1.3619								201012_at	6.00371e-20	11.5272	9.6235	1.90371
206765_at	3.82203e-23	11.6246	9.89676	1.72784								206296_x_at	6.15053e-20	7.53755	9.02241	-1.48486
215743_at	3.94503e-23	4.2621	5.51051	-1.24841								217167_x_at	6.22541e-20	9.73902	7.81608	1.92294
219526_at	4.07816e-23	7.33978	8.04861	-0.708836								210711_at	6.60784e-20	7.84877	6.52217	1.32659
218460_at	4.21778e-23	7.34021	8.24643	-0.906217								200985_s_at	7.37919e-20	10.3432	8.47086	1.87233
211596_s_at	4.85499e-23	5.6293	7.14909	-1.51979								215524_x_at	7.4343e-20	5.92272	7.53767	-1.61494
213988_s_at	5.01008e-23	12.0698	10.8404	1.22941								217394_at	7.60919e-20	5.07454	7.173	-2.09846
210555_s_at	5.04548e-23	8.17137	9.72004	-1.54867								218325_s_at	7.61512e-20	7.72162	8.5348	-0.813175
222126_at	5.10776e-23	6.13688	7.21453	-1.07765								212935_at	7.95253e-20	5.67983	6.38012	-0.700291
209603_at	5.40208e-23	4.49999	5.51852	-1.01853								201999_s_at	8.13569e-20	11.8473	10.2466	1.60074
59625_at	5.66198e-23	5.93954	5.27456	0.664979								202789_at	8.23134e-20	7.20987	8.89489	-1.68502
213347_x_at	5.81262e-23	12.6494	13.7011	-1.05164								200965_s_at	8.25062e-20	8.53795	10.731	-2.19301
221973_at	5.84102e-23	5.03333	6.69768	-1.66435								210872_x_at	8.60581e-20	8.73455	7.05309	1.68146
204970_s_at	6.12139e-23	8.71981	7.77619	0.943621								203964_at	8.64571e-20	11.153	9.74958	1.40342
208934_s_at	6.33041e-23	8.87637	7.33544	1.54092								218149_s_at	8.93272e-20	7.08842	8.71035	-1.62194
214430_at	6.79633e-23	9.98152	9.03206	0.949462								212462_at	9.07728e-20	6.60461	7.93069	-1.32608
213302_at	7.22068e-23	5.54019	7.08511	-1.54493								205322_s_at	9.30349e-20	9.55465	8.3343	1.22035
201470_at	7.95991e-23	11.6299	10.1891	1.44081								208113_x_at	9.98777e-20	12.3437	13.1011	-0.757358
210607_at	8.45893e-23	6.4676	8.68426	-2.21665								203264_s_at	1.02735e-19	5.54342	6.72595	-1.18253
219045_at	8.49908e-23	8.02577	9.29896	-1.27319								218575_at	1.02826e-19	7.18571	8.16866	-0.982957
221597_s_at	8.87762e-23	8.85625	8.01691	0.839336								202874_s_at	1.09546e-19	9.2297	7.17919	2.05051
214496_x_at	9.07768e-23	6.17931	7.06152	-0.882217								206542_s_at	1.10774e-19	7.71511	8.99702	-1.28191
219423_x_at	9.10729e-23	6.0241	8.24916	-2.22505								212400_at	1.17249e-19	7.94175	10.0226	-2.08084
214148_at	9.2078e-23	7.02332	7.98231	-0.958994								217838_s_at	1.21479e-19	9.55328	11.2882	-1.73489
211561_x_at	9.42488e-23	10.6429	8.92287	1.72002								202786_at	1.22592e-19	6.40396	7.68187	-1.2779
212771_at	9.70137e-23	5.80156	7.21649	-1.41493								205456_at	1.28668e-19	8.16201	10.3162	-2.1542
206296_x_at	1.00984e-22	7.38135	9.02241	-1.64106								210951_x_at	1.28695e-19	10.8725	9.58949	1.28304
212814_at	1.02547e-22	7.49386	8.24394	-0.75008								216515_x_at	1.29871e-19	10.2816	11.0942	-0.812575
202971_s_at	1.0501e-22	6.49435	8.39869	-1.90434								202530_at	1.3226e-19	11.8587	10.5302	1.32842
201188_s_at	1.08141e-22	6.16689	7.17057	-1.00368								212433_x_at	1.39288e-19	13.2137	13.8513	-0.637669
218932_at	1.08189e-22	5.60739	7.31107	-1.70368								206662_at	1.39535e-19	10.6491	9.33652	1.31255
201032_at	1.10383e-22	9.18699	9.78966	-0.602671								200003_s_at	1.59234e-19	13.6117	14.2173	-0.60561
201421_s_at	1.16877e-22	7.11529	7.81639	-0.701097								209623_at	1.73157e-19	7.44771	8.51043	-1.06273
204305_at	1.2327e-22	4.61435	5.15403	-0.539683								52731_at	1.73284e-19	6.49308	7.35966	-0.866574
213619_at	1.25971e-22	10.7917	12.0961	-1.30443								205324_s_at	1.75778e-19	7.62323	8.68212	-1.05889
201189_s_at	1.26136e-22	7.28036	8.73812	-1.45776								210663_s_at	1.76528e-19	8.66614	7.1909	1.47524
212945_s_at	1.31117e-22	6.48889	7.49415	-1.00527								212646_at	1.76699e-19	8.91936	10.0616	-1.14226
200957_s_at	1.31203e-22	7.61299	8.61287	-0.999878								203897_at	1.7922e-19	9.82306	8.52631	1.29676
220251_at	1.31221e-22	5.98478	6.82479	-0.840002								201701_s_at	1.79221e-19	5.47532	6.48068	-1.00536
37860_at	1.36465e-22	7.16938	7.98284	-0.813459								200810_s_at	1.8365e-19	9.41681	10.7769	-1.36005
201746_at	1.38013e-22	6.27525	7.87229	-1.59704								218833_at	1.90088e-19	6.66551	5.59219	1.07331
211282_x_at	1.49852e-22	6.85072	8.10935	-1.25864								202941_at	1.92122e-19	9.37494	8.56434	0.810598
201064_s_at	1.51016e-22	8.5819	9.99059	-1.40868								204385_at	1.92396e-19	8.3681	7.20932	1.15878
209881_s_at	1.52259e-22	8.01398	9.34336	-1.32938								216457_s_at	1.92937e-19	10.2206	11.1043	-0.883728
201697_s_at	1.55248e-22	7.7877	9.15482	-1.36712								207460_at	1.98525e-19	6.4931	8.20232	-1.70922
200708_at	1.56807e-22	8.37565	9.42566	-1.05001								212655_at	2.03435e-19	5.87164	7.0381	-1.16646
219812_at	1.6335e-22	7.99578	9.97461	-1.97884								39248_at	2.07331e-19	7.10999	9.68884	-2.57885
213658_at	1.70556e-22	5.70828	6.65279	-0.94451								212137_at	2.23771e-19	9.33458	10.2874	-0.95287
208117_s_at	1.71706e-22	7.73345	8.53908	-0.805635								203408_s_at	2.26491e-19	10.4992	11.5676	-1.06843
202189_x_at	1.77314e-22	9.69639	10.4749	-0.778538								209670_at	2.26773e-19	9.77036	11.9071	-2.13674
214705_at	1.78618e-22	4.04758	5.71954	-1.67196								218917_s_at	2.33229e-19	9.68026	10.6019	-0.921661
217170_at	1.82635e-22	5.912	6.96366	-1.05166								208619_at	2.34478e-19	9.35556	10.1822	-0.826634
201717_at	1.89047e-22	8.97011	9.6145	-0.644393								200597_at	2.44253e-19	6.59556	7.68888	-1.09332
202584_at	1.91236e-22	7.26314	8.00955	-0.746415								217785_s_at	2.46984e-19	6.76353	5.66615	1.09739
219315_s_at	1.93291e-22	7.21932	9.389	-2.16968								201537_s_at	2.55821e-19	8.1871	6.866	1.3211
222040_at	1.97298e-22	6.88305	7.94627	-1.06322								202683_s_at	2.66299e-19	7.2714	8.16268	-0.891281
209993_at	2.02121e-22	4.841	5.90113	-1.06013								221971_x_at	2.75237e-19	7.72822	8.63603	-0.907807
200909_s_at	2.02878e-22	13.0727	13.8847	-0.811978								202872_at	2.80614e-19	8.23173	6.1841	2.04763
201892_s_at	2.04655e-22	8.63957	10.1662	-1.52662								209020_at	2.86385e-19	9.5431	8.6809	0.862203
203939_at	2.19313e-22	4.85746	6.3249	-1.46744								208864_s_at	2.87981e-19	10.1904	8.11868	2.07171
201677_at	2.19752e-22	6.38679	7.37058	-0.983793								218282_at	3.01242e-19	9.74282	8.76364	0.979184
214219_x_at	2.37893e-22	7.23371	8.80877	-1.57506								207601_at	3.01565e-19	7.60803	5.945	1.66304
202530_at	2.43003e-22	11.9752	10.5302	1.44494								221589_s_at	3.0307e-19	5.39773	6.83169	-1.43396
220099_s_at	2.48597e-22	8.08786	9.1151	-1.02725								202523_s_at	3.04613e-19	6.89259	8.20607	-1.31347
203240_at	2.62698e-22	5.79317	7.16704	-1.37387								206099_at	3.20529e-19	7.87861	9.05622	-1.17761
220330_s_at	2.66461e-22	10.5927	7.92435	2.66838								202561_at	3.2239e-19	6.75279	7.66145	-0.908661
217821_s_at	2.68983e-22	7.29764	8.66839	-1.37075								215823_x_at	3.40971e-19	11.8396	12.6247	-0.785154
206034_at	2.75371e-22	7.79891	6.7757	1.02321								203371_s_at	3.41793e-19	9.47269	7.42957	2.04312
214049_x_at	2.77703e-22	7.88508	9.63917	-1.75408								220367_s_at	3.51714e-19	7.83251	8.58187	-0.749355
211271_x_at	2.78772e-22	9.75746	10.456	-0.698578								212599_at	3.60347e-19	6.07578	8.35899	-2.28321
212413_at	2.79437e-22	6.54491	8.0196	-1.4747								221839_s_at	3.62564e-19	7.32623	8.26386	-0.937638
218328_at	2.92308e-22	7.05042	8.00212	-0.951701								214016_s_at	3.67795e-19	9.72999	10.5393	-0.809358
221481_x_at	2.92431e-22	10.4339	11.3388	-0.904866								216841_s_at	3.71121e-19	11.7866	10.3687	1.41781
216306_x_at	2.93362e-22	10.4251	11.2538	-0.828684								214339_s_at	3.80137e-19	7.0845	8.47641	-1.39191
218095_s_at	3.12906e-22	9.18203	6.92046	2.26157								217388_s_at	3.80952e-19	9.55796	7.92345	1.63451
212715_s_at	3.42309e-22	5.40205	6.61211	-1.21006								219041_s_at	3.91901e-19	8.76902	9.75035	-0.981331
217526_at	3.43302e-22	8.19215	9.34371	-1.15156								205527_s_at	3.97757e-19	6.27257	7.22073	-0.948162
39650_s_at	3.4431e-22	6.18361	7.43551	-1.2519								210561_s_at	4.15703e-19	11.0792	9.78729	1.29191
209702_at	3.518e-22	7.56902	8.92082	-1.3518								209190_s_at	4.19067e-19	10.087	11.0256	-0.938575
210847_x_at	3.53083e-22	6.07924	7.93182	-1.85258								202481_at	4.22171e-19	6.91035	8.19187	-1.28152
203683_s_at	3.75312e-22	5.80133	6.74477	-0.943436								213340_s_at	4.22801e-19	6.86684	7.9603	-1.09346
214615_at	3.84412e-22	4.18178	5.3	-1.11822								201479_at	4.36382e-19	8.03003	8.87377	-0.843742
211841_s_at	3.88681e-22	6.63838	8.01087	-1.3725								221965_at	4.40642e-19	6.72201	8.24083	-1.51881
214339_s_at	3.9173e-22	6.91607	8.47641	-1.56034								213109_at	4.41457e-19	5.83135	7.06914	-1.23779
209567_at	3.92575e-22	7.47871	8.49004	-1.01133								205255_x_at	4.58717e-19	10.4029	12.2067	-1.80381
221492_s_at	3.97724e-22	11.1842	10.0565	1.12772								213658_at	4.68538e-19	5.74082	6.65279	-0.911968
210156_s_at	4.03203e-22	9.54204	8.03354	1.50849								205416_s_at	4.83949e-19	5.72238	4.77666	0.945712
221036_s_at	4.17045e-22	9.19766	8.29262	0.905037								205702_at	4.94474e-19	7.41002	6.17365	1.23637
215262_at	4.17103e-22	4.12338	5.70148	-1.5781								212823_s_at	5.12006e-19	8.2309	9.41864	-1.18774
212144_at	4.57051e-22	9.4476	10.2698	-0.82224								218060_s_at	5.23949e-19	9.97216	8.71174	1.26042
214081_at	4.58524e-22	4.64437	5.98203	-1.33765								204529_s_at	5.24722e-19	4.93476	6.4044	-1.46965
204484_at	5.03508e-22	7.52989	8.74856	-1.21868								217707_x_at	5.32816e-19	7.52109	8.6955	-1.17441
38340_at	5.074e-22	7.48778	8.44582	-0.958033								202577_s_at	5.69187e-19	6.2184	7.34819	-1.12978
200737_at	5.07506e-22	10.8809	9.72491	1.15603								205590_at	5.70408e-19	7.56692	9.54619	-1.97927
201934_at	5.13319e-22	9.85824	11.2671	-1.40883								218018_at	5.75063e-19	8.44871	7.47304	0.975672
214022_s_at	5.17041e-22	14.0071	13.2527	0.754406								201778_s_at	6.15136e-19	9.82796	10.5663	-0.738297
212646_at	5.18535e-22	8.72533	10.0616	-1.33629								203278_s_at	6.17162e-19	11.1852	10.1593	1.02597
221965_at	5.64485e-22	6.70375	8.24083	-1.53707								212331_at	6.49831e-19	9.29533	10.4762	-1.18089
209005_at	5.67771e-22	9.85832	8.59187	1.26645								213947_s_at	6.58465e-19	8.38916	9.53887	-1.14971
211600_at	5.79454e-22	10.0692	11.8282	-1.75903								216621_at	6.70606e-19	8.26744	7.19495	1.07248
208834_x_at	5.81528e-22	13.673	14.3476	-0.674565								214472_at	6.72781e-19	9.09426	6.87249	2.22177
200956_s_at	5.8776e-22	6.89194	8.05139	-1.15945								212320_at	7.24564e-19	10.2973	11.3196	-1.02231
219041_s_at	6.38979e-22	8.87183	9.75035	-0.87853								218031_s_at	7.32285e-19	8.7543	9.82843	-1.07413
210951_x_at	6.42025e-22	10.89	9.58949	1.30052								203535_at	7.34967e-19	14.7214	13.9105	0.810893
214760_at	6.50893e-22	7.48406	8.42094	-0.936884								221524_s_at	7.45686e-19	9.36724	8.36346	1.00378
222101_s_at	6.63365e-22	5.79748	7.09024	-1.29276								208003_s_at	7.46334e-19	7.99483	6.61575	1.37907
217760_at	6.85116e-22	8.10444	8.94687	-0.842428								203007_x_at	7.50336e-19	10.1629	8.97309	1.18985
205416_s_at	6.95264e-22	5.95463	4.77666	1.17796								205284_at	7.53391e-19	5.58662	6.24968	-0.663064
208662_s_at	7.33949e-22	8.56041	10.0444	-1.48404								216942_s_at	7.53817e-19	8.90648	7.14903	1.75746
214971_s_at	7.52645e-22	4.99822	6.51463	-1.51642								204861_s_at	7.59728e-19	9.70046	7.71931	1.98115
221493_at	7.83996e-22	9.09097	10.1174	-1.02643								213958_at	7.70236e-19	8.57196	10.1251	-1.55309
213947_s_at	8.39438e-22	8.34929	9.53887	-1.18959								215966_x_at	7.78977e-19	9.12182	7.17021	1.95161
210202_s_at	8.75874e-22	7.47271	8.83301	-1.36029								205896_at	7.86372e-19	11.0423	9.23238	1.8099
216559_x_at	8.7938e-22	8.08504	9.04858	-0.963546								203288_at	8.17273e-19	6.90754	7.93597	-1.02843
208734_x_at	8.89777e-22	9.87265	9.17025	0.702406								217526_at	8.30013e-19	8.19366	9.34371	-1.15005
54970_at	9.14548e-22	8.61124	9.37682	-0.765584								221919_at	8.3719e-19	5.99028	7.56008	-1.56979
39318_at	9.6604e-22	6.9807	9.48213	-2.50143								202199_s_at	8.50413e-19	8.5689	7.28004	1.28886
210242_x_at	9.82572e-22	8.53846	7.77107	0.767394								200956_s_at	8.53093e-19	6.9529	8.05139	-1.0985
204099_at	1.00307e-21	9.53073	8.06335	1.46738								213524_s_at	8.62393e-19	8.82313	6.38944	2.43369
201012_at	1.0089e-21	11.8216	9.6235	2.19813								201675_at	8.8194e-19	6.78306	7.93521	-1.15215
220144_s_at	1.01438e-21	4.32527	5.07181	-0.746546								212771_at	8.9182e-19	5.89946	7.21649	-1.31703
212098_at	1.02473e-21	8.99952	9.89107	-0.891555								209682_at	8.92946e-19	7.47913	8.92374	-1.44461
203012_x_at	1.03206e-21	13.365	14.2128	-0.847765								211270_x_at	8.98763e-19	9.62133	10.5855	-0.96416
205745_x_at	1.19428e-21	8.80975	7.90195	0.907791								215731_s_at	9.22774e-19	5.35995	6.88341	-1.52346
210370_s_at	1.21997e-21	6.00757	7.70927	-1.7017								204970_s_at	9.7593e-19	8.77076	7.77619	0.994575
205590_at	1.26572e-21	7.50167	9.54619	-2.04452								204891_s_at	9.79744e-19	9.85252	11.7847	-1.93214
210386_s_at	1.266e-21	10.8085	9.8899	0.918572								216237_s_at	1.02288e-18	8.20671	9.16123	-0.954518
212602_at	1.29752e-21	10.2173	8.73548	1.48179								212123_at	1.02662e-18	7.12011	7.6199	-0.49979
200058_s_at	1.30249e-21	9.9996	10.9424	-0.942785								214728_x_at	1.04765e-18	8.31569	9.21466	-0.898964
205690_s_at	1.37615e-21	9.73362	9.01737	0.716253								212706_at	1.05942e-18	5.8192	7.98622	-2.16702
200933_x_at	1.38291e-21	12.7921	13.781	-0.988875								207566_at	1.07872e-18	7.3937	6.39335	1.00036
217791_s_at	1.38479e-21	6.62498	7.52783	-0.902851								210829_s_at	1.11411e-18	6.61818	7.68215	-1.06397
219798_s_at	1.39236e-21	8.864	9.69694	-0.832944								212057_at	1.11957e-18	7.44945	8.90836	-1.45891
218833_at	1.39988e-21	6.73075	5.59219	1.13856								222369_at	1.16845e-18	5.63088	6.97585	-1.34497
212114_at	1.41738e-21	8.944	9.55552	-0.611518								217760_at	1.22101e-18	8.02044	8.94687	-0.926422
212673_at	1.42137e-21	7.62761	8.50108	-0.873471								212259_s_at	1.2371e-18	8.13611	9.82703	-1.69093
211105_s_at	1.47622e-21	7.78448	8.85536	-1.07088								219077_s_at	1.23791e-18	5.86457	6.86247	-0.9979
202466_at	1.6362e-21	8.00644	9.04752	-1.04108								201032_at	1.2484e-18	9.2438	9.78966	-0.545862
215157_x_at	1.64738e-21	13.1673	13.8164	-0.649114								212814_at	1.25954e-18	7.50944	8.24394	-0.734499
213263_s_at	1.67016e-21	8.38569	9.36279	-0.977103								203922_s_at	1.29825e-18	10.4959	9.16027	1.33564
212690_at	1.68425e-21	5.43815	7.19624	-1.75809								213804_at	1.29886e-18	6.83955	7.7498	-0.91025
216515_x_at	1.7041e-21	10.153	11.0942	-0.941147								210027_s_at	1.29906e-18	9.60122	10.6685	-1.06731
208842_s_at	1.72887e-21	8.70743	9.44181	-0.734382								203787_at	1.3059e-18	6.75277	8.20309	-1.45032
201186_at	1.82549e-21	10.4614	9.46836	0.993075								213408_s_at	1.32062e-18	9.66296	10.5997	-0.936769
210449_x_at	1.85086e-21	10.6174	8.92328	1.69409								203556_at	1.321e-18	8.74632	9.56403	-0.817711
221641_s_at	1.85233e-21	9.91804	9.05627	0.861769								202478_at	1.34148e-18	7.13499	9.19243	-2.05744
212375_at	1.87859e-21	6.91517	8.17372	-1.25855								203865_s_at	1.36871e-18	6.57254	7.87343	-1.30088
203964_at	1.9523e-21	11.081	9.74958	1.33141								200773_x_at	1.38084e-18	11.3583	12.1854	-0.827077
213980_s_at	1.95544e-21	9.65687	10.4811	-0.824223								202189_x_at	1.54723e-18	9.58	10.4749	-0.894931
202297_s_at	2.00913e-21	9.91024	9.32503	0.585213								214659_x_at	1.58165e-18	6.29036	7.88192	-1.59156
202096_s_at	2.01306e-21	12.947	11.8362	1.11087								200961_at	1.60664e-18	10.1721	9.20077	0.971316
205403_at	2.01347e-21	12.5522	10.055	2.49726								219745_at	1.62736e-18	7.80019	6.694	1.10618
209682_at	2.14525e-21	7.45317	8.92374	-1.47057								217412_at	1.64029e-18	5.67082	7.34756	-1.67675
36888_at	2.173e-21	7.29977	7.91006	-0.610286								218168_s_at	1.642e-18	8.3085	9.53475	-1.22626
208660_at	2.17867e-21	9.94567	10.8537	-0.908024								214109_at	1.6901e-18	6.0682	7.2837	-1.2155
220941_s_at	2.1997e-21	7.27867	6.13225	1.14642								212696_s_at	1.73591e-18	9.84176	10.7684	-0.926618
214035_x_at	2.23606e-21	9.25742	10.4472	-1.18979								204890_s_at	1.74934e-18	8.58338	10.5841	-2.00068
210027_s_at	2.25834e-21	9.47085	10.6685	-1.19768								205038_at	1.75434e-18	9.00004	9.66886	-0.668818
212015_x_at	2.26748e-21	9.66105	10.4113	-0.750261								214177_s_at	1.85774e-18	9.73816	11.0392	-1.30108
214439_x_at	2.30276e-21	8.24446	9.72441	-1.47995								221601_s_at	1.88881e-18	9.91968	11.9063	-1.98661
202347_s_at	2.34224e-21	9.25001	8.67602	0.573997								219098_at	1.92624e-18	6.84299	7.53936	-0.69637
221838_at	2.35828e-21	5.78503	7.26892	-1.48389								212335_at	1.93585e-18	11.0381	9.75006	1.28803
203107_x_at	2.36914e-21	13.5379	14.169	-0.631106								208776_at	1.95964e-18	6.12639	7.05445	-0.928065
208825_x_at	2.38593e-21	13.5538	14.3161	-0.762287								212205_at	1.98891e-18	7.77747	9.10594	-1.32848
213835_x_at	2.39342e-21	6.45418	7.24007	-0.785886								214148_at	1.99874e-18	7.17852	7.98231	-0.803788
201522_x_at	2.42433e-21	9.28612	10.4728	-1.18665								212229_s_at	2.00413e-18	7.5948	8.75895	-1.16415
218409_s_at	2.43611e-21	7.94204	7.13453	0.807507								203272_s_at	2.01552e-18	8.65774	7.90758	0.750162
212145_at	2.48927e-21	7.65499	8.71907	-1.06408								201788_at	2.04077e-18	7.97665	8.82784	-0.851188
212056_at	2.63412e-21	7.2223	8.62416	-1.40185								204713_s_at	2.07388e-18	9.80792	8.15542	1.6525
201162_at	2.71012e-21	8.97562	7.65012	1.3255								200096_s_at	2.11933e-18	12.9252	12.2051	0.720115
208268_at	2.7475e-21	4.39948	5.86181	-1.46233								200063_s_at	2.13309e-18	10.7895	11.8966	-1.10706
209091_s_at	2.76944e-21	12.1523	10.8087	1.34357								204593_s_at	2.18354e-18	6.79138	7.73634	-0.944959
204068_at	2.79092e-21	7.82491	6.03465	1.79025								219890_at	2.1977e-18	7.88803	5.49886	2.38917
203579_s_at	2.86227e-21	6.16188	7.48658	-1.32471								203648_at	2.2276e-18	8.71682	9.41764	-0.700821
217728_at	2.89712e-21	13.3416	12.6137	0.727944								210113_s_at	2.23201e-18	8.3381	9.64774	-1.30964
201537_s_at	2.91422e-21	8.06638	6.866	1.20038								205936_s_at	2.24394e-18	11.5997	9.86093	1.73875
212485_at	2.95756e-21	7.92566	8.82801	-0.902354								207072_at	2.32092e-18	11.9724	9.72051	2.25187
212660_at	2.97306e-21	8.99276	10.2644	-1.27162								216199_s_at	2.39857e-18	7.69316	8.92127	-1.22811
201726_at	3.04831e-21	9.61093	10.402	-0.791085								206464_at	2.40844e-18	8.69644	6.19477	2.50167
205790_at	3.05721e-21	7.06634	8.69335	-1.62702								201892_s_at	2.41507e-18	8.8787	10.1662	-1.2875
214150_x_at	3.09001e-21	11.7164	11.1805	0.535885								201529_s_at	2.42073e-18	8.48324	9.84696	-1.36372
212593_s_at	3.12354e-21	9.26646	10.3373	-1.07086								219812_at	2.45204e-18	8.28349	9.97461	-1.69112
204143_s_at	3.15803e-21	6.32705	7.88669	-1.55964								204366_s_at	2.58773e-18	8.8005	9.71537	-0.914872
204043_at	3.17853e-21	8.65144	7.32354	1.3279								202680_at	2.64356e-18	8.54558	7.86693	0.678648
55616_at	3.19413e-21	7.09514	7.84794	-0.752795								208748_s_at	2.78325e-18	9.4459	7.68625	1.75965
202912_at	3.22525e-21	11.8231	10.0064	1.8167								221501_x_at	2.82877e-18	10.3079	11.5578	-1.24985
204019_s_at	3.22985e-21	6.3763	8.48879	-2.11249								209558_s_at	2.8366e-18	6.71085	7.79456	-1.08371
216232_s_at	3.28659e-21	7.0525	8.06313	-1.01063								205259_at	2.85032e-18	4.69937	5.904	-1.20463
205324_s_at	3.3333e-21	7.52483	8.68212	-1.15729								204977_at	2.91958e-18	6.20367	6.99325	-0.789585
203385_at	3.37334e-21	9.17187	10.669	-1.49709								210105_s_at	2.92138e-18	10.4732	11.664	-1.19083
201225_s_at	3.51908e-21	9.54906	10.6447	-1.09559								211955_at	2.94828e-18	7.22332	8.1569	-0.933574
200735_x_at	3.54672e-21	12.737	13.4369	-0.699882								212231_at	3.08238e-18	7.2177	8.16875	-0.951054
202652_at	3.60903e-21	5.72706	6.75036	-1.02329								212066_s_at	3.11915e-18	9.37639	10.0019	-0.625547
206966_s_at	3.69944e-21	6.84544	7.97333	-1.12789								222126_at	3.15259e-18	6.16479	7.21453	-1.04975
210101_x_at	3.82191e-21	11.7349	10.4007	1.33421								212547_at	3.18543e-18	8.49109	9.24918	-0.758086
207601_at	3.90624e-21	7.83437	5.945	1.88937								210466_s_at	3.31624e-18	9.97699	10.7325	-0.755526
213109_at	4.03236e-21	5.83762	7.06914	-1.23152								201561_s_at	3.35534e-18	7.96599	9.17231	-1.20632
219151_s_at	4.27778e-21	6.43853	7.75945	-1.32092								37590_g_at	3.35699e-18	6.02366	6.75247	-0.728808
209448_at	4.3809e-21	10.2954	9.35793	0.937419								213390_at	3.36576e-18	9.13292	10.0971	-0.964151
202135_s_at	4.48028e-21	8.02974	8.57873	-0.54899								201031_s_at	3.36779e-18	10.3121	11.3635	-1.05138
216000_at	4.52451e-21	5.23558	6.32318	-1.0876								210223_s_at	3.38944e-18	8.27471	7.22114	1.05357
212139_at	4.6182e-21	7.45392	8.50657	-1.05264								217804_s_at	3.42919e-18	8.3023	9.0321	-0.729805
205977_s_at	4.77749e-21	6.31517	7.27218	-0.957007								212593_s_at	3.45511e-18	9.2778	10.3373	-1.05952
203723_at	4.78789e-21	8.57041	9.87733	-1.30692								207287_at	3.49945e-18	7.93479	7.05299	0.881794
47560_at	4.81825e-21	5.5073	6.633	-1.1257								213407_at	3.509e-18	5.83722	6.57072	-0.733501
205844_at	4.84109e-21	10.8222	7.57702	3.24514								214908_s_at	3.60926e-18	5.81568	6.87221	-1.05653
214129_at	4.85475e-21	5.77822	7.05789	-1.27967								201960_s_at	3.65667e-18	9.83365	10.8086	-0.974947
216199_s_at	4.88185e-21	7.74968	8.92127	-1.17159								217759_at	3.74888e-18	8.99063	9.93999	-0.949353
202208_s_at	4.893e-21	8.53578	9.99606	-1.46028								201272_at	3.75745e-18	8.83418	9.99406	-1.15988
208635_x_at	4.93464e-21	12.931	13.6194	-0.688357								221499_s_at	3.75973e-18	9.88527	9.13374	0.751531
201391_at	5.1147e-21	7.51772	8.45439	-0.936665								208766_s_at	3.80691e-18	9.69623	10.5663	-0.870113
214016_s_at	5.18062e-21	9.69643	10.5393	-0.842917								219675_s_at	3.83288e-18	7.06044	8.16216	-1.10171
220048_at	5.18329e-21	6.00862	6.85463	-0.846007								212238_at	3.85786e-18	7.01925	7.8042	-0.784949
218454_at	5.2467e-21	13.3656	12.1408	1.22481								218076_s_at	3.86587e-18	8.79095	9.70153	-0.910582
208663_s_at	5.38274e-21	6.41097	7.96095	-1.54997								209841_s_at	3.89749e-18	4.92752	7.1751	-2.24758
206445_s_at	5.45085e-21	7.98891	9.24076	-1.25185								210312_s_at	3.91842e-18	8.12157	7.43589	0.685675
212237_at	5.51134e-21	7.59303	8.44511	-0.852086								200057_s_at	3.97277e-18	11.1479	12.0837	-0.935728
221648_s_at	5.62822e-21	4.99245	6.42166	-1.42921								216331_at	4.04022e-18	7.51494	5.77924	1.73571
200880_at	5.6579e-21	9.44097	7.9501	1.49087								214321_at	4.1123e-18	4.17271	6.50716	-2.33445
202472_at	5.67619e-21	5.70146	6.75898	-1.05752								204929_s_at	4.20511e-18	8.97523	7.15079	1.82444
210872_x_at	5.77227e-21	8.59056	7.05309	1.53747								214486_x_at	4.35322e-18	10.8089	9.9513	0.857605
209498_at	5.82518e-21	10.8496	8.1373	2.71235								204089_x_at	4.39874e-18	7.6895	8.8652	-1.1757
212655_at	5.91121e-21	5.95383	7.0381	-1.08427								207623_at	4.49251e-18	5.57111	6.62378	-1.05266
200644_at	5.99659e-21	8.89529	10.5413	-1.64601								218440_at	4.50515e-18	7.30142	8.224	-0.922573
213666_at	6.15687e-21	8.04259	9.42289	-1.3803								206765_at	4.6623e-18	11.5515	9.89676	1.65473
208602_x_at	6.22427e-21	6.35515	7.79532	-1.44017								217170_at	4.72572e-18	5.94724	6.96366	-1.01642
217759_at	6.30375e-21	8.95737	9.93999	-0.982616								200863_s_at	4.72913e-18	11.2999	10.7402	0.559654
216841_s_at	6.52581e-21	11.6691	10.3687	1.30034								212486_s_at	4.82339e-18	6.79703	8.28285	-1.48582
215411_s_at	6.9768e-21	7.22066	7.97232	-0.751666								204153_s_at	4.87322e-18	9.31283	10.3889	-1.0761
203831_at	7.10554e-21	8.58889	9.31061	-0.721717								211889_x_at	4.92417e-18	9.55586	6.92323	2.63262
205715_at	7.28532e-21	10.224	8.61127	1.61269								204799_at	5.17269e-18	4.95816	5.95849	-1.00033
218060_s_at	7.33429e-21	9.74891	8.71174	1.03716								204352_at	5.233e-18	7.63176	9.19998	-1.56822
206385_s_at	7.3838e-21	4.29739	6.21048	-1.91309								34225_at	5.27205e-18	7.21571	8.1651	-0.949389
201272_at	7.44114e-21	8.66354	9.99406	-1.33053								201361_at	5.28367e-18	8.19607	9.2359	-1.03983
210592_s_at	7.45984e-21	12.9471	12.0949	0.852149								201349_at	5.29482e-18	10.2983	11.2998	-1.0015
211372_s_at	7.63753e-21	12.3647	9.50681	2.85784								204773_at	5.32885e-18	6.32836	7.8951	-1.56674
221919_at	8.41219e-21	5.97551	7.56008	-1.58457								214219_x_at	5.33521e-18	7.36828	8.80877	-1.44048
203062_s_at	8.47604e-21	6.28075	7.45895	-1.17821								221480_at	5.36105e-18	5.38105	6.18827	-0.807221
206464_at	8.78996e-21	8.69975	6.19477	2.50498								209870_s_at	5.36457e-18	7.95286	8.82248	-0.86962
203119_at	8.85431e-21	6.10098	6.89607	-0.795095								211596_s_at	5.46314e-18	5.67644	7.14909	-1.47265
206618_at	9.16989e-21	9.61402	6.80746	2.80656								210386_s_at	5.62562e-18	10.8124	9.8899	0.922519
204089_x_at	9.23773e-21	7.77006	8.8652	-1.09514								216863_s_at	5.7679e-18	6.99225	8.19328	-1.20102
200074_s_at	9.26677e-21	11.5119	12.6527	-1.14079								40446_at	5.89019e-18	9.48705	10.168	-0.680945
201926_s_at	9.4288e-21	12.2365	10.7406	1.4959								200036_s_at	6.23015e-18	11.4269	12.5591	-1.13217
219975_x_at	9.58347e-21	7.35103	3.92774	3.42329								208713_at	6.29242e-18	9.65791	10.5061	-0.848165
215966_x_at	9.70056e-21	8.97517	7.17021	1.80496								206828_at	6.38539e-18	6.44416	8.39292	-1.94876
209558_s_at	9.75433e-21	6.58917	7.79456	-1.20539								201092_at	6.39432e-18	8.39492	9.33675	-0.941835
217977_at	1.09868e-20	13.3197	12.5416	0.77802								218505_at	6.40394e-18	7.65929	8.59059	-0.931302
221123_x_at	1.12747e-20	6.92374	8.22741	-1.30367								211584_s_at	6.54215e-18	6.57357	7.38833	-0.814753
203387_s_at	1.12833e-20	6.09165	7.78912	-1.69748								203547_at	6.60131e-18	8.65661	10.1651	-1.50849
200023_s_at	1.18675e-20	11.3438	12.379	-1.03514								206150_at	6.63493e-18	8.72101	10.8101	-2.08912
218653_at	1.22317e-20	6.28122	7.01774	-0.736526								214838_at	6.70531e-18	7.55396	6.6292	0.924759
204142_at	1.25989e-20	6.75696	7.9377	-1.18074								221726_at	6.86732e-18	9.36486	10.7061	-1.34122
219073_s_at	1.26087e-20	4.56959	6.52675	-1.95717								215191_at	6.94716e-18	9.08747	8.03086	1.05661
205831_at	1.26187e-20	9.01323	10.824	-1.81073								202084_s_at	6.9817e-18	11.4879	12.5169	-1.02891
207574_s_at	1.26511e-20	10.5114	9.46066	1.05074								203107_x_at	7.1247e-18	13.6586	14.169	-0.510452
205861_at	1.28473e-20	6.96733	8.66108	-1.69375								219734_at	7.20269e-18	6.77964	8.33943	-1.55979
209995_s_at	1.28475e-20	7.58973	9.74427	-2.15454								204212_at	7.45568e-18	8.91102	8.20847	0.702547
208827_at	1.28618e-20	9.80974	8.94652	0.863219								221850_x_at	7.81032e-18	8.17177	9.16934	-0.997569
219662_at	1.31787e-20	6.38558	5.65657	0.729009								202753_at	8.1864e-18	10.2384	9.62272	0.61571
205527_s_at	1.3726e-20	6.31046	7.22073	-0.910267								204142_at	8.24974e-18	6.74568	7.9377	-1.19202
219279_at	1.38191e-20	7.24987	8.76467	-1.5148								209128_s_at	8.25744e-18	8.04558	8.74815	-0.702572
202464_s_at	1.38576e-20	10.7572	8.62941	2.12776								209498_at	8.41719e-18	10.9037	8.1373	2.76642
204423_at	1.40912e-20	8.00096	7.2142	0.786761								211852_s_at	8.62929e-18	5.32317	6.21737	-0.894202
210532_s_at	1.41685e-20	9.50434	7.49754	2.0068								219045_at	8.64632e-18	8.14396	9.29896	-1.155
209304_x_at	1.42277e-20	10.0722	9.10424	0.967961								206385_s_at	8.65883e-18	4.2897	6.21048	-1.92078
215797_at	1.43364e-20	4.83132	5.70286	-0.871547								207704_s_at	8.73266e-18	9.87904	7.84023	2.03882
208723_at	1.44613e-20	8.01808	9.26354	-1.24546								218695_at	8.8018e-18	9.503	7.79018	1.71282
211721_s_at	1.44663e-20	4.52159	5.67729	-1.15571								221495_s_at	8.92812e-18	9.92651	10.6595	-0.733008
213084_x_at	1.44752e-20	13.5652	14.3804	-0.815138								211005_at	9.07773e-18	8.16078	9.82229	-1.66151
203547_at	1.45455e-20	8.53936	10.1651	-1.62574								218992_at	9.18139e-18	8.39234	7.08556	1.30678
200773_x_at	1.49303e-20	11.2781	12.1854	-0.907283								209201_x_at	9.28952e-18	10.6939	11.8593	-1.16543
203818_s_at	1.49455e-20	7.66495	8.60543	-0.940481								207492_at	9.44037e-18	7.72337	6.72905	0.994322
221536_s_at	1.50648e-20	7.1676	8.17629	-1.00868								211434_s_at	1.01102e-17	8.19336	6.80192	1.39144
204699_s_at	1.61079e-20	6.16697	6.9582	-0.79123								211087_x_at	1.02473e-17	8.55586	6.98749	1.56837
200672_x_at	1.61272e-20	6.64604	7.80441	-1.15837								205708_s_at	1.0476e-17	7.78807	6.66417	1.12389
218189_s_at	1.63586e-20	9.43742	8.41421	1.02321								205715_at	1.05076e-17	10.1781	8.61127	1.56678
202025_x_at	1.6602e-20	9.72472	9.07014	0.654581								207180_s_at	1.09434e-17	9.55906	8.59594	0.963122
202155_s_at	1.68831e-20	10.9135	10.052	0.861488								201652_at	1.09578e-17	9.27824	8.31611	0.962132
203094_at	1.69042e-20	9.0634	8.30718	0.756226								200595_s_at	1.10302e-17	8.72307	10.1552	-1.43213
219906_at	1.70809e-20	9.26231	8.18231	1.08								201536_at	1.10341e-17	9.88246	8.72049	1.16197
208653_s_at	1.72012e-20	9.85052	8.53622	1.31429								202100_at	1.10975e-17	11.6414	10.609	1.03233
205484_at	1.7455e-20	7.76965	9.00474	-1.23509								219715_s_at	1.11115e-17	7.1606	7.961	-0.800396
219098_at	1.81166e-20	6.78224	7.53936	-0.75712								203385_at	1.12982e-17	9.18158	10.669	-1.48738
216044_x_at	1.81833e-20	5.02654	6.50351	-1.47697								203206_at	1.13273e-17	8.29593	9.19256	-0.896626
214221_at	1.83341e-20	5.45118	6.32385	-0.872676								36888_at	1.15048e-17	7.28406	7.91006	-0.625998
207157_s_at	1.86781e-20	12.7402	12.0808	0.65947								218696_at	1.176e-17	6.46423	7.96542	-1.50119
211685_s_at	1.89969e-20	5.96599	7.20086	-1.23486								209040_s_at	1.17902e-17	11.5515	10.6871	0.86438
202969_at	1.99331e-20	6.23777	7.58646	-1.34869								211883_x_at	1.18245e-17	10.0441	7.90206	2.14207
34225_at	2.09657e-20	7.27928	8.1651	-0.885818								209508_x_at	1.21795e-17	11.3705	10.4688	0.901738
212750_at	2.12853e-20	7.3618	8.68422	-1.32242								204305_at	1.22237e-17	4.61611	5.15403	-0.537916
211714_x_at	2.15017e-20	9.78824	10.7848	-0.996564								209871_s_at	1.27142e-17	6.95552	8.34837	-1.39285
211300_s_at	2.18321e-20	5.62432	6.72653	-1.10221								203723_at	1.27321e-17	8.78545	9.87733	-1.09188
209026_x_at	2.22831e-20	9.61049	10.5684	-0.957951								217969_at	1.27489e-17	9.98336	10.9944	-1.01107
205702_at	2.28688e-20	7.44647	6.17365	1.27281								210582_s_at	1.28109e-17	11.3884	9.97984	1.40852
218594_at	2.33668e-20	7.6705	8.50475	-0.834244								204538_x_at	1.29626e-17	9.99671	11.2101	-1.21341
1007_s_at	2.35951e-20	6.79904	7.42764	-0.628606								218312_s_at	1.31931e-17	7.51968	8.7459	-1.22622
205284_at	2.41783e-20	5.61449	6.24968	-0.635196								210242_x_at	1.35139e-17	8.6197	7.77107	0.848633
218269_at	2.45387e-20	7.40328	8.26078	-0.857507								212206_s_at	1.38338e-17	7.31506	8.2686	-0.953539
218286_s_at	2.51399e-20	8.04278	7.06256	0.980226								218501_at	1.41765e-17	8.32294	9.68486	-1.36192
214321_at	2.57779e-20	4.44133	6.50716	-2.06583								201317_s_at	1.42462e-17	9.54808	8.21841	1.32967
202874_s_at	2.61534e-20	9.3434	7.17919	2.16421								212723_at	1.43898e-17	9.22948	8.35593	0.873541
205997_at	2.6155e-20	5.86793	7.2011	-1.33317								209463_s_at	1.45527e-17	8.37804	7.76848	0.60956
201555_at	2.68825e-20	7.52209	8.57451	-1.05242								203396_at	1.45866e-17	8.79577	7.42789	1.36787
208752_x_at	2.71316e-20	9.74347	10.9683	-1.22479								211946_s_at	1.4989e-17	10.6138	11.3696	-0.755873
200945_s_at	2.73929e-20	9.51334	10.4166	-0.903236								208758_at	1.49943e-17	8.00856	9.23676	-1.2282
212696_s_at	2.74324e-20	9.81511	10.7684	-0.95327								210101_x_at	1.52526e-17	11.8577	10.4007	1.45702
208813_at	2.76549e-20	6.5294	7.34196	-0.812563								202208_s_at	1.58237e-17	8.64286	9.99606	-1.35319
204040_at	2.78403e-20	6.6114	7.88429	-1.27289								202380_s_at	1.619e-17	8.17852	9.26978	-1.09126
204929_s_at	2.84549e-20	9.14684	7.15079	1.99605								205863_at	1.63768e-17	13.1807	10.0967	3.08406
214551_s_at	2.85827e-20	6.82311	8.82468	-2.00156								201400_at	1.6412e-17	12.5849	11.8807	0.704165
65585_at	2.92702e-20	5.72441	6.88806	-1.16364								212712_at	1.70121e-17	6.25338	6.89844	-0.645056
213099_at	2.99068e-20	7.30812	7.89982	-0.591693								208760_at	1.73521e-17	7.33421	8.44712	-1.11291
64418_at	3.02853e-20	9.07084	9.79932	-0.728477								206485_at	1.7423e-17	7.22388	8.4576	-1.23372
213628_at	3.09734e-20	6.15415	7.03687	-0.882721								203250_at	1.76829e-17	8.05762	9.20588	-1.14825
201767_s_at	3.11106e-20	7.10738	7.80763	-0.700254								212832_s_at	1.77069e-17	7.3117	8.01896	-0.707266
203733_at	3.16369e-20	7.27578	8.08291	-0.807131								211180_x_at	1.77509e-17	6.20533	5.36989	0.835438
213785_at	3.20038e-20	5.62645	6.35897	-0.732519								210915_x_at	1.78809e-17	10.4876	12.3429	-1.85524
221937_at	3.25458e-20	9.28039	10.0369	-0.756555								208499_s_at	1.83185e-17	6.62326	5.50043	1.12283
203897_at	3.25851e-20	9.68138	8.52631	1.15507								218184_at	1.84553e-17	5.78163	6.79652	-1.01489
202683_s_at	3.31881e-20	7.33594	8.16268	-0.826743								208896_at	1.84816e-17	6.61798	7.99829	-1.38031
202578_s_at	3.35267e-20	6.27115	7.13252	-0.861368								211824_x_at	1.86577e-17	7.89677	9.26501	-1.36823
219155_at	3.35582e-20	8.60371	9.49551	-0.891801								201739_at	1.8747e-17	8.95657	10.559	-1.60244
200687_s_at	3.41703e-20	8.14659	9.1404	-0.993806								221790_s_at	1.88472e-17	8.45724	10.095	-1.63774
202252_at	3.44049e-20	8.45245	7.06369	1.38876								221536_s_at	1.94562e-17	7.0228	8.17629	-1.15349
208898_at	3.5651e-20	9.59091	8.16202	1.42889								219700_at	1.97548e-17	5.0655	6.61797	-1.55247
212894_at	3.75338e-20	6.50802	7.33169	-0.823666								212945_s_at	1.9767e-17	6.46822	7.49415	-1.02593
219622_at	3.806e-20	10.0655	8.36234	1.70315								205758_at	1.98289e-17	8.2613	10.3001	-2.03885
200881_s_at	3.90472e-20	10.6668	9.28659	1.3802								218454_at	1.99321e-17	13.2341	12.1408	1.0933
218885_s_at	3.95731e-20	4.59461	5.70664	-1.11203								219151_s_at	2.03239e-17	6.57439	7.75945	-1.18506
210145_at	3.97181e-20	6.40786	4.83636	1.5715								212414_s_at	2.04157e-17	8.94437	10.2393	-1.29497
206697_s_at	3.97751e-20	10.4007	6.72073	3.68001								218667_at	2.04522e-17	8.07646	9.02911	-0.952643
214032_at	3.99339e-20	8.05822	9.95706	-1.89884								216559_x_at	2.0493e-17	8.18841	9.04858	-0.860167
212935_at	4.00048e-20	5.61734	6.38012	-0.762777								200045_at	2.066e-17	8.66721	9.42676	-0.75955
201328_at	4.181e-20	9.94141	8.45447	1.48695								202431_s_at	2.06798e-17	8.63278	10.3546	-1.72187
206118_at	4.20725e-20	7.58729	8.97338	-1.38609								202562_s_at	2.07219e-17	6.89032	7.76134	-0.871022
200675_at	4.22014e-20	9.75611	10.9451	-1.18896								203846_at	2.07264e-17	6.05131	6.96991	-0.918604
203061_s_at	4.25457e-20	6.26663	6.94747	-0.68084								216044_x_at	2.09524e-17	5.07071	6.50351	-1.4328
212433_x_at	4.39115e-20	13.0796	13.8513	-0.771785								202414_at	2.13965e-17	7.69391	8.56686	-0.872942
212452_x_at	4.46379e-20	6.525	7.32772	-0.80272								201689_s_at	2.14055e-17	4.87318	6.60888	-1.7357
205758_at	4.49145e-20	8.2216	10.3001	-2.07854								211822_s_at	2.16934e-17	8.06872	9.36799	-1.29927
39249_at	4.52754e-20	6.97404	7.85392	-0.879887								202499_s_at	2.24319e-17	12.1632	10.7207	1.44256
201298_s_at	4.56275e-20	10.7899	9.72777	1.06212								200672_x_at	2.27853e-17	6.73728	7.80441	-1.06713
206177_s_at	4.62332e-20	10.2204	6.59099	3.62944								35685_at	2.28736e-17	9.22905	9.83553	-0.606477
206181_at	4.69323e-20	6.26259	7.61775	-1.35516								203430_at	2.28751e-17	10.5355	9.5078	1.02769
217805_at	4.79505e-20	6.85822	8.00295	-1.14473								204040_at	2.32824e-17	6.37191	7.88429	-1.51238
207416_s_at	4.87237e-20	7.57649	8.29909	-0.722602								211828_s_at	2.39985e-17	6.76617	8.08242	-1.31625
202953_at	4.92144e-20	8.50791	5.54536	2.96255								216306_x_at	2.46943e-17	10.3016	11.2538	-0.952122
202441_at	4.93635e-20	10.3127	8.74757	1.56514								209840_s_at	2.50698e-17	5.32587	7.68352	-2.35766
210142_x_at	4.97463e-20	12.26	11.0355	1.22452								204019_s_at	2.53518e-17	6.53378	8.48879	-1.955
218706_s_at	5.106e-20	4.29972	5.1027	-0.802973								217028_at	2.5505e-17	11.3936	12.3429	-0.949354
210191_s_at	5.22435e-20	7.44317	5.84373	1.59944								214618_at	2.56023e-17	5.93415	4.71434	1.21981
219531_at	5.49308e-20	5.32644	5.88474	-0.558307								200655_s_at	2.76182e-17	11.6451	12.0986	-0.45346
207704_s_at	5.81048e-20	9.67852	7.84023	1.8383								202123_s_at	2.79681e-17	7.33265	8.09286	-0.760203
212996_s_at	5.86363e-20	4.75149	5.44973	-0.698245								215157_x_at	2.79904e-17	13.2388	13.8164	-0.577622
221143_at	5.87149e-20	6.12625	4.88726	1.23899								218286_s_at	2.81604e-17	8.12778	7.06256	1.06522
208470_s_at	5.90556e-20	9.98776	6.12178	3.86597								210609_s_at	2.87542e-17	7.94321	6.40757	1.53564
209906_at	6.10741e-20	11.2235	9.15187	2.07167								208443_x_at	2.9108e-17	5.23239	4.57104	0.66135
200651_at	6.12819e-20	12.4962	13.4752	-0.979026								201825_s_at	2.95439e-17	7.53943	6.65434	0.885088
212967_x_at	6.43086e-20	9.66715	10.8968	-1.22961								222040_at	2.98466e-17	6.91361	7.94627	-1.03266
218016_s_at	6.49276e-20	7.448	8.49098	-1.04298								201230_s_at	2.99057e-17	7.60495	8.1865	-0.581554
212463_at	6.63642e-20	10.0423	8.33327	1.70904								201746_at	3.0114e-17	6.28806	7.87229	-1.58423
206126_at	6.70208e-20	6.225	7.6527	-1.42769								220418_at	3.0641e-17	6.75512	8.60377	-1.84865
206025_s_at	6.76207e-20	11.5207	8.32714	3.1936								212672_at	3.08417e-17	8.24587	9.52877	-1.2829
219922_s_at	6.89337e-20	6.85885	8.48777	-1.62893								219818_s_at	3.11236e-17	6.0361	6.95008	-0.913982
207566_at	6.94288e-20	7.31074	6.39335	0.917394								214032_at	3.16095e-17	8.15734	9.95706	-1.79972
218953_s_at	7.00027e-20	7.80644	8.71377	-0.907333								218460_at	3.17049e-17	7.39038	8.24643	-0.856052
218910_at	7.14292e-20	8.37968	7.32023	1.05944								206576_s_at	3.17114e-17	8.98858	6.29699	2.69159
212121_at	7.16995e-20	6.62683	7.62531	-0.998479								211893_x_at	3.2099e-17	6.51539	7.77695	-1.26155
56197_at	7.34318e-20	9.94756	10.9292	-0.981671								204099_at	3.25755e-17	9.44518	8.06335	1.38183
202680_at	7.4139e-20	8.4984	7.86693	0.63147								204801_s_at	3.27903e-17	6.61464	5.741	0.873647
205544_s_at	7.44554e-20	4.97246	6.21912	-1.24666								201307_at	3.30622e-17	6.29091	7.17931	-0.888399
209156_s_at	7.74872e-20	6.04192	7.09314	-1.05122								218363_at	3.31885e-17	5.6914	6.31946	-0.628066
213524_s_at	7.77088e-20	8.58858	6.38944	2.19914								205584_at	3.33913e-17	5.62036	6.72929	-1.10893
219757_s_at	8.3118e-20	9.44841	8.06401	1.3844								211919_s_at	3.39202e-17	10.7012	11.7787	-1.07749
219745_at	8.32831e-20	7.85625	6.694	1.16225								212660_at	3.47572e-17	9.10958	10.2644	-1.15479
49329_at	8.45694e-20	6.88284	8.03865	-1.1558								209575_at	3.55375e-17	11.1602	10.1751	0.985112
200702_s_at	8.49221e-20	6.81656	7.63818	-0.821617								200675_at	3.61726e-17	9.85479	10.9451	-1.09027
221798_x_at	8.5884e-20	13.9385	14.4099	-0.471456								220485_s_at	3.78742e-17	6.56948	8.48602	-1.91654
221250_s_at	8.75408e-20	8.59803	7.81077	0.787264								213798_s_at	3.80199e-17	13.5658	13.0149	0.550866
210999_s_at	8.93311e-20	8.54417	6.43227	2.11189								204297_at	3.81691e-17	8.99982	8.25508	0.744745
210581_x_at	9.04775e-20	5.53377	6.18781	-0.65404								211108_s_at	3.82687e-17	6.52992	5.20611	1.32382
214298_x_at	9.09126e-20	9.00652	10.4471	-1.44054								214971_s_at	3.83263e-17	5.1368	6.51463	-1.37784
212288_at	9.13249e-20	10.8774	11.7233	-0.845817								205254_x_at	3.83415e-17	6.58828	8.54364	-1.95537
218031_s_at	9.32371e-20	8.84868	9.82843	-0.979752								221602_s_at	3.84468e-17	8.75893	10.7633	-2.00437
209501_at	9.82887e-20	6.87338	8.10817	-1.2348								218809_at	3.85066e-17	10.1634	9.64856	0.514838
202759_s_at	1.01517e-19	6.50377	7.77381	-1.27004								201488_x_at	3.86171e-17	9.90398	10.48	-0.57598
217591_at	1.01747e-19	7.69301	6.40732	1.28569								221235_s_at	3.98552e-17	6.92235	7.57483	-0.652478
208749_x_at	1.03474e-19	12.3204	11.1163	1.20413								217099_s_at	4.00217e-17	6.94387	7.58251	-0.638648
212863_x_at	1.06528e-19	10.2644	10.9922	-0.72777								209945_s_at	4.14862e-17	9.42131	8.60542	0.81589
213587_s_at	1.06631e-19	7.37327	8.66109	-1.28782								201391_at	4.15896e-17	7.65444	8.45439	-0.799944
201030_x_at	1.06665e-19	10.0812	11.6761	-1.59492								218885_s_at	4.19367e-17	4.55819	5.70664	-1.14845
218601_at	1.12129e-19	7.39571	8.05014	-0.654434								214522_x_at	4.22022e-17	7.13068	5.87871	1.25198
211025_x_at	1.12896e-19	10.8207	9.98192	0.838798								214255_at	4.26384e-17	6.6959	7.80386	-1.10796
213540_at	1.23203e-19	6.73525	7.70049	-0.965235								206983_at	4.33013e-17	5.98911	7.43119	-1.44207
204714_s_at	1.24193e-19	9.93971	8.35488	1.58482								221876_at	4.3719e-17	7.16447	7.85897	-0.694498
214180_at	1.27956e-19	5.82395	6.78697	-0.963012								209911_x_at	4.37784e-17	10.4755	8.99207	1.48345
206545_at	1.29862e-19	5.66222	7.39501	-1.73279								217874_at	4.39187e-17	10.2348	9.61086	0.623898
210561_s_at	1.30753e-19	10.9916	9.78729	1.20429								221756_at	4.39702e-17	9.02429	10.5032	-1.47893
203433_at	1.32066e-19	8.86173	7.91963	0.942102								209091_s_at	4.40604e-17	12.2289	10.8087	1.42021
209442_x_at	1.33622e-19	5.6432	6.36349	-0.720298								214494_s_at	4.43181e-17	9.05914	9.83782	-0.778681
218494_s_at	1.35572e-19	7.51835	8.84166	-1.3233								209092_s_at	4.51947e-17	7.34483	8.40263	-1.05779
78495_at	1.36513e-19	7.38989	8.14365	-0.753763								218269_at	4.68696e-17	7.35208	8.26078	-0.908701
40446_at	1.37052e-19	9.38487	10.168	-0.783123								209881_s_at	4.72685e-17	8.17851	9.34336	-1.16485
212068_s_at	1.4009e-19	8.67779	9.50641	-0.828618								217964_at	4.81428e-17	7.64115	8.68603	-1.04488
200036_s_at	1.40957e-19	11.1683	12.5591	-1.39086								202657_s_at	4.86889e-17	8.24809	9.17552	-0.927435
218968_s_at	1.4128e-19	6.32486	7.04846	-0.723597								218247_s_at	4.97122e-17	4.93051	6.46885	-1.53835
217167_x_at	1.41634e-19	9.51598	7.81608	1.6999								202385_s_at	4.98408e-17	6.57682	7.2999	-0.723079
213564_x_at	1.41977e-19	10.4516	12.0477	-1.59614								200050_at	5.46396e-17	6.66116	7.95877	-1.29761
202446_s_at	1.42419e-19	11.993	10.0765	1.9165								206592_s_at	5.46799e-17	10.0147	10.5508	-0.536104
202931_x_at	1.4563e-19	7.83742	9.19341	-1.35599								207157_s_at	5.50217e-17	12.7445	12.0808	0.663739
204860_s_at	1.47685e-19	10.1674	7.83508	2.33229								206118_at	5.7178e-17	7.74494	8.97338	-1.22844
203288_at	1.51437e-19	6.78033	7.93597	-1.15565								213980_s_at	5.76324e-17	9.71689	10.4811	-0.764204
209310_s_at	1.52616e-19	10.374	9.18761	1.18638								215967_s_at	5.78725e-17	7.93972	9.20813	-1.26842
205418_at	1.56652e-19	10.2868	9.20016	1.08662								209305_s_at	5.84168e-17	9.18038	7.98402	1.19636
208709_s_at	1.58825e-19	10.8344	10.3038	0.530613								202491_s_at	5.84389e-17	7.72298	8.69106	-0.968081
208661_s_at	1.60165e-19	6.51204	7.90713	-1.39509								203130_s_at	5.95128e-17	5.64175	6.56952	-0.92777
215731_s_at	1.60871e-19	5.4394	6.88341	-1.44401								211725_s_at	6.09332e-17	10.74	9.77709	0.962903
206111_at	1.63238e-19	11.3473	8.95092	2.39636								213534_s_at	6.24128e-17	6.46968	8.35623	-1.88655
218552_at	1.63353e-19	7.98911	9.20582	-1.21671								204883_s_at	6.26556e-17	7.639	7.06431	0.574688
214193_s_at	1.66613e-19	5.01338	5.925	-0.911619								213048_s_at	6.43904e-17	10.2875	11.1395	-0.852039
210105_s_at	1.67421e-19	10.3978	11.664	-1.26624								209304_x_at	6.50309e-17	10.0975	9.10424	0.993257
218282_at	1.69904e-19	9.56515	8.76364	0.801511								219110_at	6.50623e-17	7.18889	7.95031	-0.76142
217513_at	1.76492e-19	7.27485	5.71644	1.5584								41577_at	6.5158e-17	7.26644	8.65878	-1.39234
212071_s_at	1.78769e-19	8.8222	10.4503	-1.62807								218259_at	6.67646e-17	5.51549	6.59324	-1.07775
212017_at	1.81499e-19	8.44296	9.3574	-0.914443								202537_s_at	6.73056e-17	9.39278	8.32377	1.06901
202188_at	1.92155e-19	7.69114	8.67541	-0.984272								214430_at	6.80546e-17	9.88525	9.03206	0.853191
210663_s_at	1.96368e-19	8.41256	7.1909	1.22166								208737_at	6.87942e-17	10.7946	9.55178	1.24284
210201_x_at	1.98235e-19	8.22803	9.54672	-1.31869								222204_s_at	7.22572e-17	5.40468	6.63281	-1.22813
201601_x_at	2.01595e-19	13.9424	13.1547	0.787715								58696_at	7.28813e-17	9.70519	8.08011	1.62508
211623_s_at	2.04286e-19	9.25243	10.5444	-1.29196								214945_at	7.44867e-17	5.38534	7.03677	-1.65144
208040_s_at	2.0752e-19	7.70609	6.9943	0.711794								202096_s_at	7.47523e-17	12.8952	11.8362	1.05903
202279_at	2.13596e-19	8.51299	6.78266	1.73033								214400_at	7.5222e-17	7.26766	5.89095	1.3767
202300_at	2.15718e-19	10.9271	9.79088	1.13618								218594_at	7.55751e-17	7.71757	8.50475	-0.787175
202521_at	2.2767e-19	8.92093	9.88837	-0.967438								205791_x_at	7.59672e-17	6.52908	5.64921	0.87987
205019_s_at	2.27944e-19	7.42305	8.59519	-1.17214								219073_s_at	7.66668e-17	4.64267	6.52675	-1.88409
204881_s_at	2.29085e-19	10.0583	7.85219	2.2061								218402_s_at	7.68712e-17	6.15209	6.87159	-0.719501
212153_at	2.33081e-19	9.07107	9.58366	-0.512584								217356_s_at	7.82783e-17	12.1304	11.2833	0.847132
201561_s_at	2.37774e-19	8.03112	9.17231	-1.14119								203028_s_at	8.02559e-17	13.5847	13.0018	0.582978
210223_s_at	2.40173e-19	8.22362	7.22114	1.00248								200819_s_at	8.21913e-17	13.4776	14.0733	-0.595788
209750_at	2.50593e-19	4.77381	6.33979	-1.56598								201188_s_at	8.3195e-17	6.38678	7.17057	-0.783791
208657_s_at	2.54182e-19	8.21353	9.80815	-1.59462								205353_s_at	8.40371e-17	7.72874	8.91043	-1.1817
211010_s_at	2.62146e-19	6.28074	7.56061	-1.27986								217842_at	8.47458e-17	6.60293	7.55659	-0.953658
210763_x_at	2.65127e-19	6.97403	8.14263	-1.16861								219566_at	8.91691e-17	7.32687	8.1062	-0.779329
200918_s_at	2.65235e-19	10.1553	10.8833	-0.727915								203935_at	9.10597e-17	6.77541	7.99198	-1.21656
219477_s_at	2.6678e-19	5.6454	6.6571	-1.0117								209025_s_at	9.22414e-17	7.0757	8.09667	-1.02097
201294_s_at	2.6698e-19	9.4155	7.38086	2.03464								213193_x_at	9.28366e-17	11.1681	13.0203	-1.85221
203759_at	2.70348e-19	7.21108	5.99196	1.21913								221757_at	9.28371e-17	8.43661	9.66901	-1.23239
203454_s_at	2.77991e-19	9.51016	8.52276	0.9874								200000_s_at	9.3697e-17	9.54758	10.7119	-1.16435
214329_x_at	2.79189e-19	9.6015	8.04214	1.55936								212178_s_at	9.74741e-17	7.72328	8.50265	-0.779368
201674_s_at	2.82235e-19	7.30216	8.38138	-1.07922								209993_at	9.85536e-17	4.89461	5.90113	-1.00652
208776_at	2.85237e-19	6.19309	7.05445	-0.861356								205407_at	1.00011e-16	4.24826	5.5287	-1.28044
210425_x_at	2.86584e-19	6.85671	8.87931	-2.02261								213596_at	1.01063e-16	9.82876	8.49391	1.33484
203922_s_at	2.86786e-19	10.4137	9.16027	1.25348								203919_at	1.02434e-16	6.0946	6.97291	-0.878313
204526_s_at	2.88517e-19	9.47119	7.83456	1.63663								32541_at	1.03099e-16	6.17798	7.22723	-1.04925
210582_s_at	2.93244e-19	11.2621	9.97984	1.28227								221798_x_at	1.05441e-16	13.9948	14.4099	-0.415143
207892_at	2.96532e-19	6.63006	7.4698	-0.839742								202106_at	1.06371e-16	8.14519	8.85227	-0.707075
202385_s_at	3.00974e-19	6.45779	7.2999	-0.842113								209310_s_at	1.07107e-16	10.3957	9.18761	1.20813
40837_at	3.02789e-19	6.70343	7.38583	-0.682399								210370_s_at	1.08146e-16	6.26879	7.70927	-1.44049
219581_at	3.04311e-19	5.58003	6.51458	-0.93455								208714_at	1.09099e-16	9.37816	10.2176	-0.839468
218997_at	3.07425e-19	6.65757	7.33556	-0.677991								91684_g_at	1.09132e-16	8.60827	7.2203	1.38797
217719_at	3.10967e-19	11.8858	12.9502	-1.0644								218401_s_at	1.09734e-16	8.67927	7.50298	1.17629
211368_s_at	3.13834e-19	11.4711	10.2674	1.20367								208602_x_at	1.09966e-16	6.54679	7.79532	-1.24852
201652_at	3.16215e-19	9.34881	8.31611	1.03271								212114_at	1.10044e-16	8.94877	9.55552	-0.606745
205541_s_at	3.2288e-19	5.99293	7.21999	-1.22706								202578_s_at	1.10485e-16	6.30371	7.13252	-0.828805
213093_at	3.30615e-19	6.89425	8.19597	-1.30172								213137_s_at	1.12217e-16	8.19215	7.31527	0.876886
201648_at	3.35826e-19	11.4848	12.3102	-0.825357								211367_s_at	1.14015e-16	10.5174	9.25409	1.26331
205593_s_at	3.38041e-19	4.76417	5.85371	-1.08954								205192_at	1.14202e-16	7.43178	8.34532	-0.913537
221971_x_at	3.4754e-19	7.67091	8.63603	-0.965113								210610_at	1.19843e-16	8.11268	6.06061	2.05207
218773_s_at	3.5467e-19	10.7144	9.37022	1.34417								221143_at	1.20131e-16	6.13989	4.88726	1.25264
221837_at	3.55287e-19	5.15089	6.02172	-0.870829								211339_s_at	1.2142e-16	8.09433	10.3666	-2.27225
219015_s_at	3.57978e-19	6.22852	4.86568	1.36284								214686_at	1.22159e-16	8.46938	9.61118	-1.14181
204985_s_at	3.59082e-19	7.98302	8.93915	-0.956133								220358_at	1.25624e-16	7.31228	6.41555	0.896724
219675_s_at	3.59459e-19	6.96829	8.16216	-1.19387								212594_at	1.31349e-16	6.69444	7.79163	-1.09719
221090_s_at	3.59793e-19	7.26123	8.44501	-1.18378								200881_s_at	1.31658e-16	10.7134	9.28659	1.42683
220603_s_at	3.60084e-19	10.1554	8.38658	1.76886								220607_x_at	1.34631e-16	8.4191	9.32719	-0.908089
218074_at	3.64527e-19	9.76534	9.20297	0.562375								217576_x_at	1.34937e-16	6.70822	5.77134	0.936883
208805_at	3.69544e-19	10.9471	8.72163	2.22545								205541_s_at	1.35064e-16	6.04194	7.21999	-1.17805
208664_s_at	3.70734e-19	5.37646	6.36923	-0.992768								211941_s_at	1.35238e-16	8.88866	10.0295	-1.1408
204225_at	3.72448e-19	9.71237	8.6377	1.07467								210294_at	1.37119e-16	7.75111	6.71565	1.03546
203880_at	3.7248e-19	8.63419	7.34214	1.29205								222108_at	1.40242e-16	5.54914	7.06088	-1.51173
217729_s_at	3.75581e-19	9.13886	10.4891	-1.3502								212068_s_at	1.41825e-16	8.76969	9.50641	-0.736723
212316_at	3.76218e-19	7.90667	8.84127	-0.934599								201483_s_at	1.4408e-16	9.95454	9.21562	0.738928
206042_x_at	3.88915e-19	7.90424	9.10654	-1.2023								212098_at	1.44933e-16	8.98857	9.89107	-0.902506
200096_s_at	3.90411e-19	12.9586	12.2051	0.753542								207838_x_at	1.45102e-16	7.46018	9.06088	-1.6007
219715_s_at	4.04876e-19	7.08701	7.961	-0.873987								216232_s_at	1.45136e-16	7.08472	8.06313	-0.978416
201074_at	4.05134e-19	8.81692	9.49345	-0.676524								217523_at	1.4564e-16	10.696	9.12956	1.5664
212826_s_at	4.12093e-19	10.9463	12.1425	-1.1962								209418_s_at	1.49795e-16	9.94397	9.11653	0.827435
202106_at	4.38838e-19	8.17803	8.85227	-0.674237								201477_s_at	1.52792e-16	6.81812	7.82998	-1.01187
208913_at	4.42553e-19	6.60253	7.43682	-0.834287								208184_s_at	1.58284e-16	6.32138	6.95634	-0.634964
204385_at	4.49772e-19	8.2528	7.20932	1.04348								208723_at	1.60592e-16	8.1527	9.26354	-1.11085
209511_at	4.5382e-19	8.25056	7.75571	0.494853								208598_s_at	1.61559e-16	8.86746	9.86239	-0.994929
210006_at	4.60887e-19	6.77791	8.03577	-1.25786								204484_at	1.67596e-16	7.68323	8.74856	-1.06533
219724_s_at	4.74518e-19	6.34531	7.54092	-1.19562								210825_s_at	1.70002e-16	7.98096	9.19377	-1.21281
201479_at	4.88804e-19	8.09604	8.87377	-0.77773								202025_x_at	1.73501e-16	9.73356	9.07014	0.663419
208931_s_at	4.94939e-19	6.65387	7.89253	-1.23866								215714_s_at	1.74642e-16	7.51663	8.49835	-0.981717
212218_s_at	4.97347e-19	6.57991	7.27872	-0.698814								221765_at	1.75515e-16	7.28601	4.87261	2.4134
217397_at	5.0832e-19	5.44433	6.1977	-0.753373								201105_at	1.79912e-16	12.6745	11.5944	1.08006
211984_at	5.09217e-19	10.1408	10.8782	-0.737373								211375_s_at	1.82628e-16	8.2813	9.31883	-1.03753
219038_at	5.2075e-19	4.91638	5.67327	-0.756886								213264_at	1.87658e-16	7.89394	8.706	-0.812058
200000_s_at	5.31635e-19	9.65497	10.7119	-1.05696								219766_at	1.88275e-16	8.48436	7.73547	0.748895
204454_at	5.32605e-19	6.35132	7.2649	-0.913577								220251_at	1.8983e-16	6.00558	6.82479	-0.819205
201270_x_at	5.36325e-19	8.16039	8.7502	-0.589812								203318_s_at	1.90319e-16	10.3675	9.59623	0.771274
212123_at	5.4005e-19	6.96767	7.6199	-0.652228								203941_at	1.92016e-16	7.60318	8.25803	-0.654851
203298_s_at	5.48271e-19	9.08262	10.2788	-1.1962								209359_x_at	1.92208e-16	5.65152	4.85424	0.797278
212921_at	5.57985e-19	5.90462	7.26598	-1.36135								210218_s_at	1.9477e-16	8.0368	6.80341	1.23339
204220_at	5.61657e-19	11.6948	10.3243	1.37057								38340_at	2.00434e-16	7.61417	8.44582	-0.83165
200811_at	5.90323e-19	8.43123	9.73675	-1.30552								208872_s_at	2.04162e-16	10.4188	9.64842	0.770373
201349_at	5.90697e-19	10.3157	11.2998	-0.984067								213266_at	2.05018e-16	6.35869	7.05674	-0.698044
218828_at	5.91133e-19	8.91141	9.89873	-0.987319								55616_at	2.05891e-16	7.1479	7.84794	-0.700037
221839_s_at	5.99141e-19	7.32222	8.26386	-0.94164								200610_s_at	2.09067e-16	9.82245	10.8086	-0.986116
212320_at	5.99626e-19	10.2981	11.3196	-1.02155								208076_at	2.09867e-16	7.01632	5.60475	1.41157
220607_x_at	6.00437e-19	8.39614	9.32719	-0.931048								215310_at	2.12728e-16	8.0598	7.13796	0.921841
220888_s_at	6.12768e-19	5.47655	6.40664	-0.930091								214129_at	2.1303e-16	5.85921	7.05789	-1.19868
209827_s_at	6.23456e-19	10.1647	11.2478	-1.08318								221477_s_at	2.16399e-16	11.1505	10.0058	1.14473
219641_at	6.29128e-19	6.08482	6.89764	-0.812826								211305_x_at	2.17005e-16	5.80992	5.06752	0.7424
210466_s_at	6.37221e-19	10.0516	10.7325	-0.680902								215177_s_at	2.17876e-16	5.78406	7.30587	-1.52181
221876_at	6.45613e-19	7.05114	7.85897	-0.807829								212316_at	2.18744e-16	7.98091	8.84127	-0.860361
214659_x_at	6.56177e-19	6.49191	7.88192	-1.39								208843_s_at	2.19319e-16	7.93084	9.12011	-1.18927
218254_s_at	6.86392e-19	7.73446	5.8035	1.93096								212121_at	2.20488e-16	6.84659	7.62531	-0.778721
217804_s_at	7.05012e-19	8.31125	9.0321	-0.72085								219279_at	2.21502e-16	7.19766	8.76467	-1.56701
205049_s_at	7.05341e-19	7.55893	9.33399	-1.77507								200651_at	2.21541e-16	12.7091	13.4752	-0.76614
213657_s_at	7.08648e-19	6.25955	7.23285	-0.973301								217805_at	2.26377e-16	6.84988	8.00295	-1.15307
202299_s_at	7.2361e-19	10.9934	9.84127	1.15216								211841_s_at	2.26604e-16	6.80107	8.01087	-1.20981
206420_at	7.74194e-19	10.2853	9.14106	1.14425								204562_at	2.28189e-16	6.84968	7.94019	-1.09051
219449_s_at	7.95998e-19	9.26686	8.03738	1.22948								215650_at	2.28215e-16	5.68872	5.05189	0.636826
221850_x_at	7.98237e-19	8.17342	9.16934	-0.99592								217985_s_at	2.29037e-16	10.9479	9.81953	1.12833
217807_s_at	8.00231e-19	11.9701	13.3279	-1.35778								214870_x_at	2.33972e-16	9.73925	10.8556	-1.11633
219126_at	8.00467e-19	8.19344	8.97521	-0.781773								205895_s_at	2.34146e-16	6.32584	7.1344	-0.808567
214482_at	8.39549e-19	5.52163	6.34513	-0.823497								208934_s_at	2.4421e-16	8.76229	7.33544	1.42685
214005_at	8.49256e-19	6.94722	5.77065	1.17657								205246_at	2.46833e-16	5.60491	4.93867	0.66624
211569_s_at	8.66983e-19	5.44028	6.46002	-1.01974								210581_x_at	2.51895e-16	5.51407	6.18781	-0.673738
201054_at	8.79691e-19	8.23061	9.66616	-1.43556								219423_x_at	2.58617e-16	6.26688	8.24916	-1.98228
218505_at	8.82031e-19	7.62106	8.59059	-0.969532								209567_at	2.61258e-16	7.47299	8.49004	-1.01705
207655_s_at	8.88721e-19	6.37364	8.24595	-1.87231								211272_s_at	2.63538e-16	7.2571	8.85718	-1.60008
221940_at	8.95205e-19	5.657	6.48201	-0.825011								218016_s_at	2.68966e-16	7.41503	8.49098	-1.07595
212085_at	8.98949e-19	11.1281	12.4613	-1.33326								212376_s_at	2.73476e-16	6.69027	7.39503	-0.704757
209389_x_at	9.03325e-19	8.67308	7.0095	1.66358								213628_at	2.75883e-16	6.18168	7.03687	-0.855193
216033_s_at	9.08477e-19	9.22453	10.6218	-1.3973								201858_s_at	2.77274e-16	13.7635	12.2799	1.48357
212335_at	9.20227e-19	10.8797	9.75006	1.12961								203528_at	2.77399e-16	10.081	10.9481	-0.867073
204795_at	9.24324e-19	6.32903	6.87243	-0.543392								216033_s_at	2.78791e-16	9.4051	10.6218	-1.21674
218307_at	9.2495e-19	7.44539	8.38703	-0.941639								206512_at	2.8123e-16	5.81233	4.95552	0.856815
200063_s_at	9.30571e-19	10.6781	11.8966	-1.21843								210564_x_at	2.83131e-16	10.6075	9.68017	0.927304
211070_x_at	9.56227e-19	8.83505	7.1884	1.64666								203848_at	2.84341e-16	7.65372	8.21394	-0.560219
217734_s_at	9.66769e-19	8.57462	9.47835	-0.903733								212914_at	2.84838e-16	9.33516	10.2753	-0.940177
204971_at	9.69389e-19	10.807	8.45377	2.35322								211984_at	2.97865e-16	10.2012	10.8782	-0.677017
209409_at	9.69511e-19	8.69549	6.39246	2.30303								208929_x_at	3.09653e-16	13.2953	13.8817	-0.586355
212547_at	1.0067e-18	8.51209	9.24918	-0.737089								209827_s_at	3.10386e-16	10.1362	11.2478	-1.11165
218175_at	1.01504e-18	8.22358	9.50553	-1.28196								211316_x_at	3.12531e-16	11.7719	10.8672	0.904722
202577_s_at	1.04407e-18	6.32603	7.34819	-1.02216								204835_at	3.13129e-16	6.01194	6.66417	-0.652231
220690_s_at	1.0738e-18	8.46752	7.81853	0.648996								218385_at	3.13697e-16	7.79119	7.303	0.488189
214876_s_at	1.07871e-18	4.5397	5.33358	-0.793887								218204_s_at	3.15663e-16	6.70668	7.66913	-0.962454
217986_s_at	1.10669e-18	10.5606	8.8639	1.69675								204633_s_at	3.22941e-16	8.91182	10.2497	-1.33791
222128_at	1.11732e-18	5.28598	6.28046	-0.994476								217719_at	3.25334e-16	11.9931	12.9502	-0.957025
203787_at	1.12382e-18	6.85744	8.20309	-1.34565								211796_s_at	3.34937e-16	10.704	12.5816	-1.87763
207856_s_at	1.12837e-18	6.78785	7.73509	-0.947241								208794_s_at	3.3978e-16	8.18811	9.27563	-1.08752
219815_at	1.15253e-18	6.37976	7.06522	-0.68546								212153_at	3.41621e-16	9.08639	9.58366	-0.497268
203276_at	1.18672e-18	9.86115	8.55617	1.30498								203188_at	3.43096e-16	6.26757	7.00956	-0.741985
220610_s_at	1.21675e-18	8.31698	7.51134	0.805639								211071_s_at	3.44029e-16	6.84202	7.77048	-0.928453
202193_at	1.22572e-18	11.0684	9.72023	1.34816								213612_x_at	3.45159e-16	11.1554	11.9231	-0.76768
217422_s_at	1.24085e-18	5.38306	7.00702	-1.62396								203433_at	3.47941e-16	8.90379	7.91963	0.984162
222266_at	1.24291e-18	6.81543	8.21701	-1.40158								204481_at	3.49579e-16	7.58446	8.34221	-0.75775
214643_x_at	1.27032e-18	7.70313	8.4976	-0.79447								201717_at	3.50998e-16	9.03609	9.6145	-0.578415
221216_s_at	1.27983e-18	6.45709	7.03555	-0.578463								218672_at	3.51456e-16	10.068	9.53342	0.534565
210102_at	1.29789e-18	7.37506	5.70898	1.66609								217807_s_at	3.57007e-16	12.3164	13.3279	-1.01146
220500_s_at	1.30818e-18	5.59349	6.34037	-0.746875								219724_s_at	3.607e-16	6.3151	7.54092	-1.22583
207979_s_at	1.37292e-18	7.38774	8.86987	-1.48213								202297_s_at	3.61874e-16	9.90231	9.32503	0.577282
204528_s_at	1.37791e-18	8.8392	9.88931	-1.05011								202464_s_at	3.62381e-16	10.564	8.62941	1.93464
213264_at	1.38121e-18	7.96522	8.706	-0.740775								207541_s_at	3.62468e-16	7.87274	8.88792	-1.01518
219419_at	1.39015e-18	6.83291	7.59827	-0.765356								201270_x_at	3.77332e-16	8.26403	8.7502	-0.486176
202906_s_at	1.41317e-18	9.00099	7.691	1.30999								37860_at	3.81005e-16	7.26542	7.98284	-0.717417
203611_at	1.4281e-18	8.19999	8.98336	-0.783364								207753_at	3.82525e-16	4.89258	5.95756	-1.06498
209627_s_at	1.43403e-18	5.94851	7.07673	-1.12821								205844_at	3.83177e-16	10.4309	7.57702	2.85391
217249_x_at	1.43622e-18	8.83104	7.45998	1.37106								217475_s_at	3.83275e-16	9.20938	7.46852	1.74086
213927_at	1.46387e-18	4.40565	5.22565	-0.820008								210640_s_at	3.83809e-16	7.29329	5.91582	1.37747
218383_at	1.48917e-18	10.7031	9.61374	1.08935								205929_at	3.8515e-16	6.43674	7.23187	-0.795135
221265_s_at	1.4949e-18	6.92542	7.5727	-0.647281								209236_at	3.87099e-16	7.27046	8.21171	-0.941252
207170_s_at	1.50798e-18	8.21153	9.06128	-0.849748								208040_s_at	3.8741e-16	7.73447	6.9943	0.740175
217552_x_at	1.51281e-18	9.82547	8.49245	1.33302								206221_at	3.87526e-16	4.11894	5.22456	-1.10562
216920_s_at	1.51766e-18	8.29745	10.3607	-2.06326								205364_at	3.94908e-16	5.74018	4.80166	0.938518
217627_at	1.52038e-18	6.05412	7.47091	-1.41679								214086_s_at	4.01127e-16	4.77352	5.67013	-0.896609
203455_s_at	1.53122e-18	12.6655	11.8681	0.797352								218628_at	4.0896e-16	8.28217	7.44632	0.835844
204922_at	1.56822e-18	5.59394	6.39684	-0.8029								201503_at	4.23367e-16	7.80636	8.91498	-1.10862
213588_x_at	1.57371e-18	12.1289	13.1017	-0.97287								210983_s_at	4.34789e-16	7.39531	8.32588	-0.93057
204700_x_at	1.60196e-18	5.68435	6.7734	-1.08906								207616_s_at	4.37676e-16	10.562	9.57365	0.988336
220255_at	1.61198e-18	6.27198	6.77528	-0.503298								220210_at	4.4067e-16	6.23166	5.57797	0.653686
203188_at	1.61764e-18	6.29046	7.00956	-0.719103								205819_at	4.49379e-16	8.87433	6.75528	2.11904
201230_s_at	1.63266e-18	7.62249	8.1865	-0.564005								216250_s_at	4.51534e-16	10.1552	11.0183	-0.863115
200863_s_at	1.63296e-18	11.2066	10.7402	0.466424								202296_s_at	4.52526e-16	10.6998	10.2276	0.472202
212957_s_at	1.64628e-18	5.18551	6.39673	-1.21122								219833_s_at	4.57874e-16	5.35034	6.33401	-0.983674
213361_at	1.69217e-18	9.0989	7.91743	1.18147								213851_at	4.58025e-16	7.8808	6.8971	0.983696
212039_x_at	1.70111e-18	12.4414	13.4576	-1.01617								212313_at	4.58637e-16	8.7515	9.70164	-0.95014
212234_at	1.735e-18	7.5539	8.14115	-0.587249								200022_at	4.593e-16	12.6543	13.3918	-0.737479
213474_at	1.75477e-18	7.2886	8.27345	-0.98485								202288_at	4.59679e-16	6.04855	6.50794	-0.459391
214096_s_at	1.75567e-18	8.84319	9.61868	-0.775497								218017_s_at	4.60849e-16	8.60634	9.7888	-1.18247
208881_x_at	1.76311e-18	10.1439	7.93658	2.20729								216133_at	4.72747e-16	6.08956	7.45825	-1.3687
215921_at	1.81681e-18	5.2986	6.65811	-1.3595								218494_s_at	4.78489e-16	7.61185	8.84166	-1.22981
213040_s_at	1.82738e-18	4.53918	5.36239	-0.82321								212234_at	4.82468e-16	7.46725	8.14115	-0.673898
201217_x_at	1.83425e-18	12.4455	13.4822	-1.03664								212621_at	4.90955e-16	5.46779	6.72005	-1.25226
214006_s_at	1.85662e-18	6.79384	6.18853	0.605308								208903_at	4.9275e-16	6.2305	6.92907	-0.698568
202177_at	1.86081e-18	6.50081	5.58785	0.912953								57082_at	4.93964e-16	9.31951	10.9759	-1.65639
207425_s_at	1.89541e-18	6.38899	7.67951	-1.29052								217299_s_at	4.94035e-16	7.22593	5.79062	1.43531
211744_s_at	1.98141e-18	9.15428	7.18372	1.97056								210424_s_at	4.96013e-16	5.58241	6.43699	-0.854577
202343_x_at	2.00416e-18	11.1337	10.3727	0.761004								216129_at	4.97267e-16	6.5137	5.37731	1.1364
212931_at	2.01293e-18	8.3186	8.9654	-0.646803								217825_s_at	4.9943e-16	9.3881	8.08693	1.30117
215977_x_at	2.01619e-18	9.43257	7.65155	1.78102								218095_s_at	5.01774e-16	8.50619	6.92046	1.58573
200961_at	2.03683e-18	10.0448	9.20077	0.844054								201294_s_at	5.05337e-16	9.44777	7.38086	2.06691
205568_at	2.05638e-18	13.1523	12.239	0.913248								202446_s_at	5.05613e-16	12.1273	10.0765	2.05076
201557_at	2.07492e-18	7.81571	8.62927	-0.813563								219777_at	5.20051e-16	9.03626	10.3469	-1.31068
209813_x_at	2.09635e-18	7.8698	9.98174	-2.11194								209504_s_at	5.21568e-16	5.92335	7.54467	-1.62132
209516_at	2.15739e-18	6.50343	7.28355	-0.780121								218648_at	5.27152e-16	9.37161	10.3543	-0.982666
218309_at	2.17282e-18	4.83748	5.56996	-0.732478								210592_s_at	5.29036e-16	12.9107	12.0949	0.815724
219933_at	2.22365e-18	7.83137	6.97862	0.852751								201189_s_at	5.29795e-16	7.46535	8.73812	-1.27277
219071_x_at	2.24326e-18	7.63722	8.33117	-0.693946								211792_s_at	5.30286e-16	6.64122	5.92274	0.718485
200029_at	2.24727e-18	12.8994	13.6656	-0.766155								215411_s_at	5.30795e-16	7.32222	7.97232	-0.650109
209128_s_at	2.25403e-18	8.13477	8.74815	-0.61338								212894_at	5.49353e-16	6.55329	7.33169	-0.778392
218025_s_at	2.31076e-18	6.89485	8.02023	-1.12538								200971_s_at	5.52049e-16	11.6969	11.1836	0.513273
218435_at	2.35101e-18	7.79135	6.07942	1.71193								204731_at	5.53636e-16	6.40256	8.47261	-2.07005
214472_at	2.37696e-18	8.77999	6.87249	1.9075								203210_s_at	5.54166e-16	4.92194	5.60651	-0.684576
205718_at	2.40466e-18	8.03819	9.24204	-1.20386								202183_s_at	5.54977e-16	6.6289	7.39369	-0.764787
211073_x_at	2.40477e-18	12.4211	13.4623	-1.0412								214617_at	5.55974e-16	10.4388	12.3658	-1.92694
205126_at	2.51133e-18	7.99071	6.87688	1.11383								207759_s_at	5.56238e-16	6.32943	4.71772	1.61171
208760_at	2.52303e-18	7.17768	8.44712	-1.26944								209994_s_at	5.58346e-16	4.84005	5.88389	-1.04384
215963_x_at	2.52849e-18	11.8575	12.8717	-1.01414								213689_x_at	5.63292e-16	5.76508	6.96432	-1.19925
37152_at	2.54599e-18	7.6952	8.98951	-1.29431								205821_at	5.66128e-16	7.92458	9.51853	-1.59395
212259_s_at	2.55054e-18	8.40777	9.82703	-1.41926								209501_at	5.73807e-16	6.87484	8.10817	-1.23334
203051_at	2.56851e-18	6.87603	7.47356	-0.597532								201543_s_at	5.75771e-16	8.26856	7.46497	0.803592
207616_s_at	2.6443e-18	10.5292	9.57365	0.955532								204985_s_at	5.81187e-16	8.00709	8.93915	-0.932057
219498_s_at	2.67689e-18	6.58507	7.39356	-0.808487								207163_s_at	5.8261e-16	8.59307	9.79576	-1.20269
201597_at	2.80496e-18	10.4365	8.50603	1.93045								203387_s_at	5.84105e-16	6.1183	7.78912	-1.67082
203828_s_at	2.84069e-18	9.78083	11.7802	-1.99939								200868_s_at	5.85133e-16	8.63322	7.86388	0.769335
212422_at	2.8604e-18	6.95569	7.77664	-0.820949								202177_at	6.1701e-16	6.44178	5.58785	0.853922
213689_x_at	2.88915e-18	5.74403	6.96432	-1.22029								215235_at	6.24548e-16	7.88231	9.27533	-1.39301
216212_s_at	2.91148e-18	6.90833	7.40905	-0.500721								201478_s_at	6.30837e-16	7.80278	8.52206	-0.71929
36865_at	2.92429e-18	6.14941	6.67323	-0.523816								213666_at	6.36515e-16	8.34016	9.42289	-1.08272
204633_s_at	2.93185e-18	8.64356	10.2497	-1.60617								213926_s_at	6.40304e-16	7.38391	5.78573	1.59819
37590_g_at	2.9375e-18	6.09201	6.75247	-0.660466								210607_at	6.41474e-16	6.78323	8.68426	-1.90103
214130_s_at	3.00151e-18	4.40812	5.39265	-0.984523								202160_at	6.53704e-16	9.53759	10.4818	-0.944256
220404_at	3.00533e-18	10.981	9.60957	1.3714								201170_s_at	6.6301e-16	8.46134	9.71893	-1.25759
219405_at	3.09996e-18	6.99289	7.82494	-0.832048								211783_s_at	6.63272e-16	7.07215	8.42276	-1.35061
218660_at	3.17891e-18	12.6547	11.395	1.25962								217977_at	6.69849e-16	13.4044	12.5416	0.862782
218817_at	3.22037e-18	6.74959	5.04468	1.70491								212602_at	6.77493e-16	10.1781	8.73548	1.44266
214177_s_at	3.2603e-18	9.92374	11.0392	-1.11549								211139_s_at	6.7853e-16	7.99749	7.20267	0.794819
212914_at	3.33456e-18	9.19989	10.2753	-1.07544								211600_at	6.87242e-16	10.6928	11.8282	-1.13549
211144_x_at	3.37658e-18	7.86797	9.9569	-2.08893								203760_s_at	7.04239e-16	12.3838	11.3882	0.995627
222262_s_at	3.39962e-18	6.20257	5.24498	0.957591								210997_at	7.08839e-16	6.65587	4.58111	2.07476
218327_s_at	3.43358e-18	8.36672	7.60593	0.760797								218770_s_at	7.1133e-16	6.83028	7.6972	-0.866919
201115_at	3.56087e-18	7.09701	8.02629	-0.929276								211366_x_at	7.17761e-16	11.3257	10.2984	1.02726
201568_at	3.6163e-18	8.789	6.63289	2.15611								200772_x_at	7.25281e-16	11.5672	12.3287	-0.761524
202430_s_at	3.63003e-18	10.3546	8.41011	1.94446								209970_x_at	7.27217e-16	11.6603	10.6277	1.03261
200747_s_at	3.68053e-18	8.70806	9.58074	-0.872677								217914_at	7.412e-16	7.82622	8.90285	-1.07663
209970_x_at	3.86266e-18	11.6876	10.6277	1.05998								215092_s_at	7.47784e-16	6.75252	5.88083	0.871686
201193_at	3.8798e-18	10.3789	9.34005	1.03881								203320_at	7.59023e-16	9.06689	9.95053	-0.883644
220890_s_at	4.02275e-18	8.58191	9.51746	-0.935551								214193_s_at	7.71872e-16	4.96731	5.925	-0.957684
219192_at	4.03084e-18	7.12096	8.26707	-1.14611								212043_at	7.83455e-16	11.4003	12.0428	-0.642555
221969_at	4.06248e-18	6.81403	8.81758	-2.00355								209214_s_at	7.8549e-16	10.2568	10.6326	-0.375772
221495_s_at	4.11581e-18	9.91937	10.6595	-0.740147								205118_at	7.8814e-16	9.91181	8.34624	1.56557
215233_at	4.13351e-18	6.31279	5.40226	0.910528								211073_x_at	8.0144e-16	12.6879	13.4623	-0.774423
200941_at	4.15824e-18	9.12873	8.33977	0.788954								203263_s_at	8.02884e-16	5.16842	5.95545	-0.787027
201105_at	4.21382e-18	12.6466	11.5944	1.05223								219714_s_at	8.07906e-16	5.86778	7.28109	-1.41331
216191_s_at	4.24475e-18	6.25934	8.73573	-2.47639								200959_at	8.1147e-16	8.34309	9.81595	-1.47286
202715_at	4.30855e-18	7.16237	8.02053	-0.858159								222067_x_at	8.29479e-16	10.0653	8.93337	1.13195
212471_at	4.31195e-18	6.79191	6.12601	0.665905								200702_s_at	8.42604e-16	6.84804	7.63818	-0.79014
203956_at	4.42868e-18	7.94206	8.99305	-1.051								212276_at	8.50563e-16	7.33067	8.59428	-1.2636
203073_at	4.43562e-18	7.92589	8.68155	-0.755662								220712_at	8.58792e-16	8.64138	7.32833	1.31305
202961_s_at	4.50096e-18	10.851	9.9213	0.929732								212471_at	8.6076e-16	6.75244	6.12601	0.626429
202501_at	4.5051e-18	9.79496	10.4058	-0.610819								214035_x_at	8.61557e-16	9.39179	10.4472	-1.05542
212486_s_at	4.62819e-18	7.02652	8.28285	-1.25633								222047_s_at	8.71866e-16	9.81922	10.6498	-0.830606
220018_at	4.69959e-18	6.23309	7.38012	-1.14703								208813_at	8.92082e-16	6.63366	7.34196	-0.708303
202689_at	4.71598e-18	7.78891	8.28758	-0.498673								211271_x_at	8.99073e-16	9.6753	10.456	-0.780733
200016_x_at	4.75836e-18	11.7962	12.7669	-0.970684								206618_at	9.14737e-16	9.3311	6.80746	2.52365
203133_at	4.83861e-18	10.4544	9.92004	0.534336								208030_s_at	9.2569e-16	10.1332	10.8437	-0.71055
209020_at	4.85783e-18	9.49267	8.6809	0.811768								219315_s_at	9.49276e-16	7.52994	9.389	-1.85906
47069_at	4.87729e-18	8.12461	9.432	-1.30739								208488_s_at	9.60333e-16	8.81343	7.35061	1.46282
215540_at	4.89557e-18	5.97534	6.66798	-0.692646								213560_at	9.69744e-16	5.96969	5.36774	0.601946
212082_s_at	5.10383e-18	12.9033	11.714	1.18931								200662_s_at	9.78996e-16	8.27157	9.43265	-1.16108
201656_at	5.14892e-18	6.20167	7.61533	-1.41366								206980_s_at	9.99919e-16	6.26421	7.64218	-1.37796
205708_s_at	5.22563e-18	8.04908	6.66417	1.3849								218135_at	1.00867e-15	8.41069	7.10238	1.30831
203206_at	5.24106e-18	8.2309	9.19256	-0.961665								210763_x_at	1.016e-15	7.13294	8.14263	-1.0097
208798_x_at	5.36586e-18	6.88969	9.07016	-2.18047								211623_s_at	1.0206e-15	9.54586	10.5444	-0.998543
208580_x_at	5.46233e-18	6.93988	5.8355	1.10438								201993_x_at	1.04062e-15	9.22225	10.0577	-0.835484
218338_at	5.51903e-18	6.56384	7.77325	-1.20941								200972_at	1.04249e-15	7.23555	8.41609	-1.18054
216942_s_at	5.53637e-18	8.96925	7.14903	1.82022								212110_at	1.04949e-15	5.26726	6.12165	-0.854392
219968_at	5.59078e-18	7.39146	8.30302	-0.911558								203611_at	1.07609e-15	8.19504	8.98336	-0.788321
217388_s_at	5.6305e-18	9.34717	7.92345	1.42373								204706_at	1.08034e-15	6.8064	7.59763	-0.791236
216347_s_at	5.68602e-18	5.84278	6.55033	-0.707554								220764_at	1.08518e-15	4.53783	3.92323	0.614599
218284_at	5.6978e-18	7.25889	8.33703	-1.07814								221203_s_at	1.0898e-15	6.59146	7.38093	-0.789469
221589_s_at	5.70127e-18	5.59204	6.83169	-1.23964								201298_s_at	1.09897e-15	10.8292	9.72777	1.10143
216551_x_at	5.71685e-18	6.56771	7.25757	-0.689859								39650_s_at	1.143e-15	6.36971	7.43551	-1.0658
201420_s_at	5.74755e-18	7.22676	7.72359	-0.49683								221641_s_at	1.15799e-15	9.82397	9.05627	0.767697
207543_s_at	5.7899e-18	8.14763	6.96534	1.18229								212510_at	1.16008e-15	7.4298	8.15585	-0.726055
202428_x_at	5.79213e-18	9.22757	7.65975	1.56782								212726_at	1.1606e-15	7.3571	8.15433	-0.797228
200868_s_at	5.79418e-18	8.57504	7.86388	0.711164								222088_s_at	1.16632e-15	11.5366	10.2085	1.32814
203781_at	5.85229e-18	8.83867	8.03599	0.802681								218435_at	1.17083e-15	7.48572	6.07942	1.4063
207812_s_at	5.89661e-18	8.32232	9.13367	-0.811346								204714_s_at	1.18993e-15	9.86445	8.35488	1.50956
214728_x_at	6.125e-18	8.37009	9.21466	-0.844564								210625_s_at	1.20729e-15	5.93174	6.72949	-0.797755
219774_at	6.13119e-18	6.69109	5.94463	0.746456								212659_s_at	1.22191e-15	10.459	8.86264	1.59634
218770_s_at	6.14713e-18	6.85269	7.6972	-0.84451								221004_s_at	1.22245e-15	7.52759	8.6312	-1.10361
218441_s_at	6.21061e-18	6.69304	7.35042	-0.657386								212618_at	1.22336e-15	5.93257	6.70199	-0.769416
202688_at	6.39401e-18	12.3848	10.9013	1.48346								213227_at	1.22909e-15	5.72974	6.70394	-0.974194
218092_s_at	6.51812e-18	9.50225	8.09263	1.40962								208407_s_at	1.22982e-15	5.75092	7.03168	-1.28076
217379_at	6.61322e-18	10.4027	11.3147	-0.91209								201612_at	1.24843e-15	10.2495	10.8954	-0.645851
208914_at	6.62737e-18	7.32276	8.39193	-1.06917								202200_s_at	1.29641e-15	10.5936	9.29411	1.29949
202642_s_at	6.70024e-18	7.64149	8.71143	-1.06993								209005_at	1.29825e-15	9.79326	8.59187	1.20139
206576_s_at	6.75845e-18	8.72666	6.29699	2.42967								218441_s_at	1.31091e-15	6.71104	7.35042	-0.639386
201516_at	6.7605e-18	7.62712	8.60599	-0.978868								218710_at	1.31258e-15	5.99095	6.78163	-0.790678
202905_x_at	6.8444e-18	8.55995	7.38249	1.17746								206034_at	1.32083e-15	7.66059	6.7757	0.884895
219442_at	6.95263e-18	7.57071	8.69862	-1.12792								217604_at	1.35226e-15	4.6811	5.57164	-0.890541
201689_s_at	7.11157e-18	5.01796	6.60888	-1.59092								36545_s_at	1.40406e-15	7.26068	8.38446	-1.12378
204731_at	7.15783e-18	6.41475	8.47261	-2.05786								218582_at	1.44267e-15	8.41085	7.61454	0.796312
217740_x_at	7.21526e-18	12.9509	13.6378	-0.68681								212039_x_at	1.4602e-15	12.6919	13.4576	-0.76565
215766_at	7.27289e-18	5.4087	6.05762	-0.648914								208805_at	1.46652e-15	10.6665	8.72163	1.94489
210640_s_at	7.31512e-18	7.22133	5.91582	1.30552								212191_x_at	1.46684e-15	12.887	13.5971	-0.710151
205036_at	7.37194e-18	8.97209	8.22522	0.746869								202724_s_at	1.50384e-15	7.41676	8.52541	-1.10865
206026_s_at	7.53463e-18	10.3957	7.24226	3.15341								208674_x_at	1.51442e-15	9.40952	10.0719	-0.662378
214269_at	7.56217e-18	6.5891	5.62455	0.964552								218653_at	1.51973e-15	6.37328	7.01774	-0.644461
219717_at	7.61569e-18	5.17772	6.0324	-0.854677								201926_s_at	1.52222e-15	12.207	10.7406	1.46642
203865_s_at	8.14745e-18	6.54284	7.87343	-1.33059								219526_at	1.54591e-15	7.48801	8.04861	-0.5606
205791_x_at	8.16162e-18	6.74877	5.64921	1.09956								201484_at	1.55511e-15	9.86023	9.21167	0.648563
217985_s_at	8.24748e-18	10.9801	9.81953	1.16059								204594_s_at	1.57699e-15	7.62917	8.21906	-0.589882
203941_at	8.25638e-18	7.57724	8.25803	-0.680788								204497_at	1.58777e-15	5.5966	6.82353	-1.22694
220865_s_at	8.43384e-18	7.46461	5.42243	2.04218								204528_s_at	1.61605e-15	8.88354	9.88931	-1.00576
212053_at	8.66186e-18	7.97708	8.54507	-0.567993								201186_at	1.63919e-15	10.3011	9.46836	0.832748
204713_s_at	8.73674e-18	9.53846	8.15542	1.38304								213969_x_at	1.64831e-15	12.4653	13.1643	-0.699003
214463_x_at	8.81869e-18	7.16375	5.98123	1.18252								212455_at	1.65182e-15	9.92665	10.6585	-0.731846
200810_s_at	8.88701e-18	9.58603	10.7769	-1.19083								201377_at	1.65728e-15	7.6797	8.49115	-0.811447
201688_s_at	8.92116e-18	5.55031	7.21025	-1.65993								210847_x_at	1.66362e-15	6.28998	7.93182	-1.64183
208968_s_at	9.00088e-18	8.10018	8.7042	-0.604019								204493_at	1.66997e-15	10.0629	9.16421	0.898684
214526_x_at	9.00838e-18	7.61004	8.30083	-0.690797								204225_at	1.67318e-15	9.63773	8.6377	1.00003
210424_s_at	9.01792e-18	5.64558	6.43699	-0.79141								213149_at	1.69012e-15	4.48552	5.43198	-0.946453
219433_at	9.12106e-18	5.57589	6.70063	-1.12475								212221_x_at	1.73733e-15	10.5922	11.4799	-0.887769
207838_x_at	9.2134e-18	7.57357	9.06088	-1.4873								208623_s_at	1.74618e-15	9.43178	10.344	-0.912196
203965_at	9.24951e-18	7.67703	8.45284	-0.775812								203209_at	1.76275e-15	5.68647	6.61889	-0.932421
202199_s_at	9.34018e-18	8.47577	7.28004	1.19573								201144_s_at	1.80186e-15	8.57442	7.9108	0.663621
212074_at	9.38357e-18	7.092	8.63049	-1.5385								201680_x_at	1.80305e-15	8.94101	9.74589	-0.80488
211889_x_at	9.57689e-18	9.16225	6.92323	2.23902								209440_at	1.80507e-15	7.95194	8.83766	-0.885717
218992_at	9.59736e-18	8.2571	7.08556	1.17154								211921_x_at	1.80735e-15	11.6691	12.4554	-0.786353
216250_s_at	9.76908e-18	10.0857	11.0183	-0.932658								216243_s_at	1.80902e-15	10.3109	8.65177	1.65912
46142_at	9.80642e-18	4.94391	5.70485	-0.760943								220603_s_at	1.81188e-15	10.0467	8.38658	1.66011
207753_at	9.84415e-18	4.90121	5.95756	-1.05634								204643_s_at	1.82318e-15	6.08571	6.63957	-0.553863
203021_at	9.95433e-18	10.3284	8.03672	2.29163								201103_x_at	1.84782e-15	11.1972	11.9211	-0.723856
202813_at	1.00843e-17	7.44317	8.47132	-1.02814								208657_s_at	1.84858e-15	8.32461	9.80815	-1.48353
208843_s_at	1.00881e-17	8.14353	9.12011	-0.976579								218601_at	1.86587e-15	7.52837	8.05014	-0.521774
203360_s_at	1.00998e-17	8.19816	7.39457	0.803591								212069_s_at	1.89668e-15	7.55678	8.60399	-1.04721
217063_x_at	1.02021e-17	4.1751	4.63346	-0.458365								204513_s_at	1.93474e-15	8.24375	9.29369	-1.04994
210160_at	1.03298e-17	5.7504	5.17508	0.575314								210224_at	1.93558e-15	8.42852	7.56626	0.862261
203278_s_at	1.08575e-17	11.0731	10.1593	0.913806								200049_at	1.93697e-15	8.91634	9.50475	-0.588403
213864_s_at	1.086e-17	9.48477	10.6657	-1.18089								204555_s_at	1.93932e-15	7.83627	6.45321	1.38306
204777_s_at	1.09108e-17	8.27348	10.1494	-1.87594								202892_at	1.94257e-15	6.31337	7.3418	-1.02843
201036_s_at	1.12866e-17	5.65158	6.79912	-1.14754								78495_at	1.94899e-15	7.51762	8.14365	-0.626026
218695_at	1.13681e-17	9.4577	7.79018	1.66752								213047_x_at	1.95544e-15	9.41007	10.4268	-1.01677
205565_s_at	1.18384e-17	5.8464	6.87532	-1.02892								207387_s_at	1.98053e-15	9.79372	7.94318	1.85054
205821_at	1.19035e-17	7.88376	9.51853	-1.63477								221768_at	1.99131e-15	9.37544	10.1644	-0.788923
213735_s_at	1.21557e-17	11.3815	10.6884	0.693097								208485_x_at	2.00458e-15	11.2046	10.245	0.95962
220940_at	1.21787e-17	5.56098	6.88507	-1.32409								206026_s_at	2.00778e-15	10.4812	7.24226	3.23898
203985_at	1.25204e-17	7.95719	8.43916	-0.481968								219316_s_at	2.03668e-15	8.39575	6.94612	1.44963
219346_at	1.25577e-17	4.77577	5.92738	-1.15161								208780_x_at	2.05498e-15	11.894	11.0363	0.85766
222088_s_at	1.25979e-17	11.6603	10.2085	1.45185								213269_at	2.07123e-15	5.6595	6.45205	-0.792558
201572_x_at	1.28548e-17	7.37217	8.21334	-0.841172								201217_x_at	2.0764e-15	12.7091	13.4822	-0.77307
218696_at	1.28977e-17	6.61677	7.96542	-1.34865								215233_at	2.12267e-15	6.50951	5.40226	1.10725
218152_at	1.29214e-17	6.71121	7.84526	-1.13405								213835_x_at	2.16822e-15	6.48597	7.24007	-0.754101
204615_x_at	1.30943e-17	10.0408	8.02458	2.0162								211368_s_at	2.19089e-15	11.3675	10.2674	1.10006
205963_s_at	1.31327e-17	7.7054	8.40209	-0.696693								200069_at	2.19457e-15	7.5847	8.46987	-0.88517
203118_at	1.3279e-17	8.77045	9.68883	-0.918379								207223_s_at	2.21817e-15	8.17136	7.3163	0.855059
214183_s_at	1.33361e-17	5.98192	7.27612	-1.2942								202759_s_at	2.25266e-15	6.57172	7.77381	-1.20209
218168_s_at	1.34705e-17	8.44045	9.53475	-1.09431								222133_s_at	2.3172e-15	9.60107	8.66951	0.931559
209575_at	1.36459e-17	11.0096	10.1751	0.834429								201826_s_at	2.33681e-15	6.25487	5.56421	0.690661
208190_s_at	1.4104e-17	5.39119	6.60718	-1.21598								217939_s_at	2.37586e-15	10.815	10.345	0.469933
205232_s_at	1.44145e-17	6.39983	7.16753	-0.767703								219681_s_at	2.39137e-15	10.5245	11.3213	-0.796742
221538_s_at	1.47162e-17	5.53805	6.44088	-0.902824								216570_x_at	2.41052e-15	9.66149	10.5065	-0.845012
215248_at	1.47353e-17	7.88913	5.81994	2.06919								212904_at	2.4149e-15	8.92968	9.86858	-0.938891
200972_at	1.48382e-17	7.13637	8.41609	-1.27973								209364_at	2.41763e-15	7.16613	6.62911	0.537016
211133_x_at	1.48405e-17	11.6019	10.6764	0.925477								212223_at	2.42704e-15	9.05769	10.0247	-0.967026
220036_s_at	1.49001e-17	7.59705	8.25457	-0.657518								203431_s_at	2.43068e-15	5.49314	6.41877	-0.925631
213356_x_at	1.49561e-17	11.6199	12.5005	-0.880671								216347_s_at	2.43536e-15	5.84039	6.55033	-0.709944
204372_s_at	1.51199e-17	7.58702	8.58203	-0.995012								205437_at	2.44351e-15	7.56521	8.18145	-0.616242
204191_at	1.53493e-17	7.53926	6.53634	1.00292								205020_s_at	2.44653e-15	8.75027	7.46492	1.28536
210678_s_at	1.54673e-17	7.74824	7.06133	0.686915								201025_at	2.51164e-15	4.95066	5.64679	-0.696135
217868_s_at	1.55993e-17	12.3417	10.9654	1.37629								205019_s_at	2.5251e-15	7.5546	8.59519	-1.04059
221255_s_at	1.56385e-17	8.41469	7.74974	0.664959								220200_s_at	2.62372e-15	6.84649	6.12378	0.722704
203505_at	1.58435e-17	10.0811	8.5242	1.55688								221036_s_at	2.63163e-15	9.0994	8.29262	0.806782
204327_s_at	1.60259e-17	6.09085	6.99835	-0.907499								202396_at	2.63945e-15	7.20089	8.58161	-1.38072
204198_s_at	1.6097e-17	9.1768	10.7072	-1.53037								200747_s_at	2.64039e-15	8.66139	9.58074	-0.919351
203684_s_at	1.64533e-17	4.92818	5.4629	-0.534721								209068_at	2.64796e-15	7.44363	8.51584	-1.07221
221909_at	1.69109e-17	4.70034	5.60106	-0.900724								206175_x_at	2.65892e-15	6.10514	5.25755	0.847591
200990_at	1.72693e-17	9.37572	10.5049	-1.12916								217654_at	2.6808e-15	7.95233	6.78468	1.16765
212109_at	1.76019e-17	5.89889	6.39862	-0.49973								204526_s_at	2.72912e-15	9.37153	7.83456	1.53697
36129_at	1.77371e-17	9.53793	10.1136	-0.575667								204068_at	2.73704e-15	7.66179	6.03465	1.62713
218135_at	1.78514e-17	8.45831	7.10238	1.35593								210569_s_at	2.77713e-15	9.21499	7.91117	1.30382
212695_at	1.79034e-17	7.0505	7.60903	-0.558524								48531_at	2.78541e-15	9.46485	8.92281	0.542044
218232_at	1.79123e-17	8.70696	6.27646	2.4305								218436_at	2.81795e-15	7.88286	7.21881	0.664054
214109_at	1.79964e-17	6.02924	7.2837	-1.25446								200792_at	2.84589e-15	10.6652	11.2838	-0.61864
212238_at	1.80997e-17	7.09274	7.8042	-0.711455								209446_s_at	2.86676e-15	7.19675	6.10264	1.09411
202754_at	1.82322e-17	7.49702	8.28867	-0.791654								201690_s_at	2.88053e-15	6.3675	7.69911	-1.33161
220570_at	1.83482e-17	10.1637	7.00903	3.15465								219015_s_at	2.88965e-15	6.04467	4.86568	1.17899
218712_at	1.83976e-17	4.5835	5.54034	-0.956843								210439_at	2.93165e-15	5.2971	6.09507	-0.79797
202436_s_at	1.86389e-17	10.1401	7.8079	2.33216								200023_s_at	2.95823e-15	11.5786	12.379	-0.800374
212232_at	1.91469e-17	8.14044	9.32545	-1.18501								214482_at	2.98946e-15	5.49914	6.34513	-0.845985
213798_s_at	1.91515e-17	13.5202	13.0149	0.505316								203410_at	2.99728e-15	6.57461	7.36996	-0.795348
35685_at	1.95338e-17	9.24708	9.83553	-0.588446								215838_at	3.04963e-15	10.5324	7.65842	2.87398
206453_s_at	1.98699e-17	6.4244	7.10286	-0.678458								219798_s_at	3.05668e-15	8.98364	9.69694	-0.713304
221540_x_at	2.01593e-17	7.94674	6.88761	1.05913								208795_s_at	3.09667e-15	7.92203	8.68874	-0.766713
212697_at	2.06755e-17	9.5411	10.3352	-0.794125								213036_x_at	3.13733e-15	10.2318	11.1147	-0.882902
210470_x_at	2.08801e-17	8.95716	9.89195	-0.934791								204504_s_at	3.14232e-15	7.29848	7.99222	-0.693742
212787_at	2.10879e-17	7.15612	8.63438	-1.47825								201075_s_at	3.14465e-15	7.47977	8.30514	-0.825364
54037_at	2.11602e-17	5.45215	5.90607	-0.453916								219933_at	3.146e-15	7.84674	6.97862	0.868115
209147_s_at	2.12366e-17	5.4768	6.19514	-0.718335								218120_s_at	3.1507e-15	8.25215	9.12298	-0.870829
216202_s_at	2.14038e-17	9.23948	7.97351	1.26597								217309_s_at	3.19798e-15	6.33001	5.736	0.59401
222025_s_at	2.16549e-17	8.23647	6.34977	1.8867								46142_at	3.21348e-15	4.85178	5.70485	-0.853071
204924_at	2.16769e-17	13.0218	12.1502	0.871642								212116_at	3.22208e-15	10.4859	9.70491	0.780946
203748_x_at	2.17246e-17	11.4167	10.5628	0.853868								218618_s_at	3.2457e-15	11.5552	10.3395	1.21574
212691_at	2.18364e-17	7.277	7.9346	-0.657603								217821_s_at	3.25668e-15	7.44312	8.66839	-1.22527
213645_at	2.24755e-17	6.33435	7.47113	-1.13678								206445_s_at	3.27066e-15	8.06554	9.24076	-1.17522
213288_at	2.29177e-17	8.29857	7.33997	0.958605								1598_g_at	3.32987e-15	8.20959	7.65344	0.55615
218018_at	2.29266e-17	8.25922	7.47304	0.786181								209603_at	3.33942e-15	4.58324	5.51852	-0.935275
214595_at	2.31399e-17	4.69519	5.48747	-0.792281								220371_s_at	3.35732e-15	9.93805	9.04858	0.889472
216951_at	2.3172e-17	5.55262	4.38252	1.1701								208857_s_at	3.3936e-15	9.22907	8.05271	1.17636
202780_at	2.34698e-17	6.04482	7.01896	-0.974134								220439_at	3.47988e-15	7.60738	6.79497	0.812407
205192_at	2.39358e-17	7.2183	8.34532	-1.12702								219870_at	3.6392e-15	7.02309	7.86662	-0.843528
212594_at	2.39481e-17	6.79899	7.79163	-0.992643								220237_at	3.6566e-15	5.22679	4.46033	0.766469
202200_s_at	2.40462e-17	10.6647	9.29411	1.37056								214080_x_at	3.7433e-15	9.53674	10.3458	-0.809058
219799_s_at	2.42786e-17	10.6825	8.871	1.81149								214450_at	3.75216e-15	8.72648	10.3369	-1.61047
212539_at	2.48497e-17	8.024	8.7879	-0.763893								208842_s_at	3.75656e-15	8.87364	9.44181	-0.56817
213390_at	2.49019e-17	9.30649	10.0971	-0.79058								219136_s_at	3.76194e-15	5.31803	6.07089	-0.752858
202230_s_at	2.49438e-17	8.54588	9.56202	-1.01613								202193_at	3.76891e-15	11.0014	9.72023	1.28113
206760_s_at	2.50908e-17	5.8527	7.21028	-1.35759								203051_at	3.76932e-15	6.89221	7.47356	-0.581355
212057_at	2.57517e-17	7.62047	8.90836	-1.28789								211862_x_at	3.77076e-15	11.2432	10.3215	0.921671
214173_x_at	2.63245e-17	7.09415	7.93536	-0.841211								220888_s_at	3.81113e-15	5.55208	6.40664	-0.854554
207819_s_at	2.69029e-17	4.67028	5.37521	-0.704929								218163_at	3.97101e-15	8.79297	7.55497	1.238
208598_s_at	2.69418e-17	8.90221	9.86239	-0.960187								212921_at	4.0237e-15	6.14096	7.26598	-1.12501
210829_s_at	2.72816e-17	6.69425	7.68215	-0.987898								219505_at	4.0413e-15	10.6189	12.1835	-1.56459
201296_s_at	2.7308e-17	11.2209	10.1791	1.04172								219622_at	4.14506e-15	9.96244	8.36234	1.6001
221485_at	2.73871e-17	11.1937	9.99931	1.19435								219449_s_at	4.17031e-15	9.2469	8.03738	1.20952
204376_at	2.79248e-17	4.69011	5.43354	-0.743423								202300_at	4.2766e-15	10.7436	9.79088	0.952766
207266_x_at	2.80868e-17	11.4447	10.5828	0.861976								54970_at	4.32894e-15	8.6661	9.37682	-0.710723
215127_s_at	3.00838e-17	11.7831	11.0393	0.743825								217729_s_at	4.34889e-15	9.22479	10.4891	-1.26426
204581_at	3.13729e-17	6.88335	8.24346	-1.36012								208660_at	4.39101e-15	9.96622	10.8537	-0.887472
201543_s_at	3.18761e-17	8.31432	7.46497	0.849344								211372_s_at	4.42295e-15	11.8459	9.50681	2.33913
213408_s_at	3.21449e-17	9.71381	10.5997	-0.885926								215193_x_at	4.58477e-15	11.8253	13.0789	-1.25366
203367_at	3.23752e-17	5.53041	6.28898	-0.758561								201727_s_at	4.71725e-15	6.61303	7.39449	-0.781452
200045_at	3.26831e-17	8.68792	9.42676	-0.738844								209368_at	4.72792e-15	6.1541	7.60735	-1.45326
217785_s_at	3.27299e-17	6.49321	5.66615	0.827068								218152_at	4.76083e-15	6.62487	7.84526	-1.22039
208549_x_at	3.28808e-17	9.77646	10.6358	-0.859294								219161_s_at	4.76958e-15	10.6856	9.10139	1.58418
203410_at	3.32451e-17	6.55676	7.36996	-0.813193								220330_s_at	4.80248e-15	10.2924	7.92435	2.36808
201368_at	3.37573e-17	10.5337	12.3264	-1.79267								215772_x_at	4.94779e-15	6.73874	8.19041	-1.45167
219271_at	3.38428e-17	9.26937	7.08938	2.17999								200823_x_at	4.98386e-15	12.1576	12.9101	-0.752469
203613_s_at	3.39795e-17	10.1608	9.37952	0.7813								211563_s_at	5.0147e-15	5.77639	6.76755	-0.991161
210695_s_at	3.43958e-17	6.47356	6.97072	-0.497161								202330_s_at	5.01861e-15	5.70594	6.73285	-1.02691
203556_at	3.49374e-17	8.77235	9.56403	-0.791679								219271_at	5.03904e-15	9.11914	7.08938	2.02977
215907_at	3.49595e-17	7.82065	8.85139	-1.03075								219374_s_at	5.111e-15	6.0292	6.75685	-0.72765
209359_x_at	3.58166e-17	5.65617	4.85424	0.801931								214081_at	5.17404e-15	4.71062	5.98203	-1.27141
44146_at	3.59699e-17	8.87141	9.28044	-0.409029								215743_at	5.3036e-15	4.4089	5.51051	-1.10162
212510_at	3.59883e-17	7.40362	8.15585	-0.75223								212931_at	5.31056e-15	8.38297	8.9654	-0.582432
206715_at	3.62564e-17	6.58818	4.49479	2.0934								203965_at	5.39617e-15	7.64723	8.45284	-0.805608
219356_s_at	3.67228e-17	9.31501	7.50574	1.80928								208611_s_at	5.39739e-15	8.26744	9.71704	-1.4496
208611_s_at	3.67886e-17	8.42828	9.71704	-1.28876								206363_at	5.40618e-15	6.16346	7.33136	-1.16791
212390_at	3.68069e-17	6.04136	7.16094	-1.11958								210598_at	5.44503e-15	8.11265	6.91548	1.19717
204173_at	3.73277e-17	7.22066	6.18345	1.03721								213049_at	5.53256e-15	5.89064	7.17888	-1.28824
201483_s_at	3.73971e-17	9.96029	9.21562	0.744671								47069_at	5.57988e-15	8.24595	9.432	-1.18605
218085_at	3.75087e-17	7.85597	5.75774	2.09824								219975_x_at	5.59186e-15	6.49011	3.92774	2.56237
63009_at	3.8045e-17	5.86433	6.33477	-0.47044								203485_at	5.64022e-15	6.20949	8.01248	-1.80299
208903_at	3.82345e-17	6.2439	6.92907	-0.685171								200921_s_at	5.72241e-15	11.8369	12.726	-0.889086
200792_at	3.88484e-17	10.6104	11.2838	-0.673452								203100_s_at	5.72318e-15	6.25301	7.17215	-0.919138
205895_s_at	3.89757e-17	6.41291	7.1344	-0.721497								202250_s_at	5.77904e-15	8.1347	8.95742	-0.822714
207982_at	4.04839e-17	7.60622	6.05233	1.55389								211282_x_at	5.7958e-15	6.99249	8.10935	-1.11687
215806_x_at	4.15209e-17	7.95032	9.9517	-2.00137								211976_at	5.8475e-15	8.76616	9.7074	-0.941244
201678_s_at	4.17008e-17	7.50503	8.22291	-0.717872								204833_at	5.85732e-15	7.24418	6.60989	0.634295
208149_x_at	4.23591e-17	7.39981	8.52068	-1.12087								200074_s_at	5.86837e-15	11.8162	12.6527	-0.836515
200073_s_at	4.23802e-17	9.97665	10.8593	-0.882621								202687_s_at	5.8718e-15	10.7869	9.08378	1.70311
212376_s_at	4.2601e-17	6.80463	7.39503	-0.590396								212854_x_at	5.87658e-15	10.7261	11.4216	-0.695595
219541_at	4.37995e-17	7.39553	8.48696	-1.09143								205403_at	5.95098e-15	12.0741	10.055	2.0191
211305_x_at	4.3972e-17	5.7003	5.06752	0.632777								203828_s_at	5.98907e-15	9.9859	11.7802	-1.79433
209619_at	4.39802e-17	12.5541	13.8331	-1.27898								218328_at	6.31596e-15	7.25449	8.00212	-0.747634
211921_x_at	4.43547e-17	11.4852	12.4554	-0.970232								212482_at	6.32919e-15	7.94344	8.95313	-1.0097
214220_s_at	4.52417e-17	5.16731	5.94432	-0.777008								207734_at	6.35501e-15	7.00525	8.08319	-1.07795
211828_s_at	4.53856e-17	6.68885	8.08242	-1.39357								203073_at	6.39803e-15	7.92466	8.68155	-0.756887
208766_s_at	4.59096e-17	9.81409	10.5663	-0.752253								212680_x_at	6.56404e-15	10.0811	9.0634	1.01768
221567_at	4.60489e-17	6.10495	5.57249	0.532453								221838_at	6.60935e-15	5.78832	7.26892	-1.48059
217418_x_at	4.60714e-17	7.06094	8.92979	-1.86885								221123_x_at	6.6704e-15	7.20851	8.22741	-1.01889
200022_at	4.76608e-17	12.4748	13.3918	-0.917018								206478_at	6.69447e-15	5.96004	7.2978	-1.33776
212991_at	4.77137e-17	7.74668	6.67335	1.07333								217763_s_at	6.69786e-15	12.3662	11.482	0.884218
202179_at	4.82339e-17	6.60518	7.51414	-0.908959								212657_s_at	6.748e-15	12.4413	11.0062	1.4351
219374_s_at	4.83055e-17	6.01582	6.75685	-0.741035								202641_at	6.77816e-15	7.53705	6.63297	0.904081
208915_s_at	4.83541e-17	7.60821	8.24084	-0.63263								201498_at	6.88809e-15	9.32437	9.78493	-0.460557
200959_at	4.83634e-17	8.47019	9.81595	-1.34576								203578_s_at	6.93955e-15	4.89825	5.47738	-0.579137
212823_s_at	4.92406e-17	8.29767	9.41864	-1.12097								209103_s_at	6.93992e-15	9.74457	9.16598	0.578589
205819_at	4.93898e-17	8.43915	6.75528	1.68386								208549_x_at	6.94657e-15	9.94082	10.6358	-0.694935
211883_x_at	5.0254e-17	9.70116	7.90206	1.79911								202671_s_at	6.95008e-15	9.62383	8.70292	0.920909
201612_at	5.04023e-17	10.2016	10.8954	-0.693832								218712_at	6.99059e-15	4.36984	5.54034	-1.1705
217914_at	5.1339e-17	7.75433	8.90285	-1.14852								215963_x_at	7.05027e-15	12.1274	12.8717	-0.744309
204152_s_at	5.23491e-17	7.00003	8.13494	-1.13491								203956_at	7.09245e-15	7.93839	8.99305	-1.05466
36545_s_at	5.31371e-17	7.27045	8.38446	-1.11401								202780_at	7.1799e-15	5.94416	7.01896	-1.0748
212116_at	5.42978e-17	10.5367	9.70491	0.831767								210137_s_at	7.19378e-15	7.87328	8.65912	-0.785846
201061_s_at	5.4474e-17	11.9689	9.93584	2.03306								218074_at	7.3006e-15	9.81596	9.20297	0.612986
218364_at	5.53218e-17	8.5414	7.63923	0.902164								210528_at	7.30611e-15	8.88993	7.97099	0.918937
203088_at	5.5701e-17	5.78135	7.19111	-1.40976								207551_s_at	7.37175e-15	10.4354	9.38329	1.05216
208929_x_at	5.61762e-17	13.155	13.8817	-0.726713								204474_at	7.40892e-15	7.3334	7.73575	-0.402348
202645_s_at	5.62688e-17	7.37668	8.43581	-1.05913								203732_at	7.45221e-15	9.05189	8.23396	0.817928
202491_s_at	5.62691e-17	7.75723	8.69106	-0.933827								208855_s_at	7.47091e-15	11.6601	12.1415	-0.48139
219228_at	5.65158e-17	6.52228	7.46833	-0.946053								208921_s_at	7.51444e-15	10.7564	10.1345	0.621928
207623_at	5.69794e-17	5.74915	6.62378	-0.874627								200918_s_at	7.55367e-15	10.1819	10.8833	-0.701337
200875_s_at	5.7411e-17	8.29103	9.38273	-1.0917								220018_at	7.6156e-15	6.09973	7.38012	-1.28039
218590_at	5.74439e-17	5.98511	6.74005	-0.754937								207574_s_at	7.88304e-15	10.4611	9.46066	1.00048
203774_at	5.7495e-17	5.74551	7.21133	-1.46582								202776_at	8.01029e-15	8.67511	7.79983	0.875287
49452_at	5.83583e-17	5.12172	6.15413	-1.03241								201064_s_at	8.03051e-15	8.88624	9.99059	-1.10435
206221_at	6.00997e-17	4.27642	5.22456	-0.948135								213645_at	8.11928e-15	6.26538	7.47113	-1.20575
219156_at	6.02445e-17	5.15831	6.19944	-1.04112								219922_s_at	8.14246e-15	7.01771	8.48777	-1.47007
1405_i_at	6.05176e-17	10.45	12.1425	-1.69253								211985_s_at	8.19196e-15	9.55499	10.341	-0.786023
205173_x_at	6.06496e-17	9.70092	8.03398	1.66693								218590_at	8.24905e-15	6.03531	6.74005	-0.704741
218363_at	6.11076e-17	5.65333	6.31946	-0.666135								221013_s_at	8.51254e-15	7.55129	6.78635	0.764942
218163_at	6.12459e-17	8.83459	7.55497	1.27963								217620_s_at	8.54294e-15	6.07235	5.09722	0.975133
215235_at	6.25139e-17	8.11651	9.27533	-1.15881								212750_at	8.71749e-15	7.6417	8.68422	-1.04251
201060_x_at	6.26172e-17	11.3262	9.51484	1.81137								219667_s_at	8.75036e-15	6.46936	7.98092	-1.51156
209144_s_at	6.33997e-17	5.73493	6.17988	-0.444955								200933_x_at	8.76275e-15	13.1207	13.781	-0.660276
217825_s_at	6.35572e-17	9.46084	8.08693	1.37391								201761_at	8.85376e-15	9.16306	7.14609	2.01697
216908_x_at	6.3883e-17	6.58445	7.66648	-1.08203								202917_s_at	8.87404e-15	14.3333	12.9285	1.40479
201114_x_at	6.45071e-17	10.7186	10.1224	0.596194								212084_at	8.96861e-15	7.18161	6.53532	0.646283
208872_s_at	6.45308e-17	10.3279	9.64842	0.679441								218968_s_at	9.13093e-15	6.284	7.04846	-0.764457
203725_at	6.47927e-17	9.47328	7.36255	2.11072								220570_at	9.23315e-15	10.0442	7.00903	3.03514
219136_s_at	6.52509e-17	5.37299	6.07089	-0.697898								207559_s_at	9.23877e-15	7.01884	7.79709	-0.778259
203342_at	6.52945e-17	8.84103	8.09491	0.746121								204479_at	9.2638e-15	10.6475	9.95661	0.690925
210997_at	6.55306e-17	6.87795	4.58111	2.29683								203081_at	9.41246e-15	7.77178	8.20153	-0.429751
209818_s_at	6.57114e-17	5.91551	6.37291	-0.457398								219145_at	9.55672e-15	6.32883	6.87265	-0.543815
213135_at	6.60936e-17	7.87993	9.31328	-1.43335								201065_s_at	9.6093e-15	9.87835	10.4688	-0.590484
201321_s_at	6.82895e-17	8.64375	9.57772	-0.933967								210059_s_at	9.6308e-15	7.70023	7.11965	0.580574
208678_at	7.04474e-17	10.5847	9.8067	0.777996								204860_s_at	9.64761e-15	10.0885	7.83508	2.25341
211583_x_at	7.08323e-17	7.15979	8.35548	-1.19569								208899_x_at	9.69047e-15	9.44574	8.31136	1.13438
212827_at	7.09319e-17	9.23295	11.3491	-2.1162								203905_at	9.70303e-15	8.41014	8.94643	-0.536286
216316_x_at	7.15348e-17	8.55662	6.96036	1.59626								202184_s_at	9.7819e-15	7.4623	8.17786	-0.715557
218084_x_at	7.17116e-17	11.0414	12.0418	-1.00035								201572_x_at	9.82063e-15	7.41706	8.21334	-0.796282
203648_at	7.22583e-17	8.77302	9.41764	-0.644619								205252_at	9.92394e-15	6.10958	6.64609	-0.536515
204960_at	7.2315e-17	9.04821	10.3833	-1.33512								221516_s_at	9.99106e-15	8.53107	9.22571	-0.694635
203445_s_at	7.44235e-17	10.4115	11.2753	-0.863768								205963_s_at	1.0206e-14	7.78114	8.40209	-0.620953
218120_s_at	7.46083e-17	8.11677	9.12298	-1.00621								212787_at	1.02153e-14	6.57227	8.63438	-2.06211
218618_s_at	7.52889e-17	11.4735	10.3395	1.13396								201434_at	1.03894e-14	9.25163	8.85686	0.394774
200715_x_at	7.54067e-17	11.4188	12.4178	-0.99903								216945_x_at	1.05908e-14	6.20034	8.01149	-1.81115
204977_at	7.56054e-17	6.27772	6.99325	-0.715529								214042_s_at	1.06338e-14	9.69395	10.9331	-1.23919
209253_at	7.60777e-17	7.4812	8.18751	-0.70631								204700_x_at	1.06665e-14	5.67885	6.7734	-1.09456
211391_s_at	7.6239e-17	5.43503	6.11823	-0.683194								202326_at	1.07543e-14	6.88241	8.15508	-1.27266
218091_at	7.68187e-17	9.65452	8.16737	1.48715								213277_at	1.10444e-14	5.82269	5.2565	0.56619
213842_x_at	7.77284e-17	9.18705	9.86614	-0.679092								221287_at	1.10758e-14	8.08071	7.2352	0.845508
211366_x_at	7.86854e-17	11.3484	10.2984	1.05003								47560_at	1.11197e-14	5.612	6.633	-1.02099
210569_s_at	7.98729e-17	9.13713	7.91117	1.22596								218953_s_at	1.13869e-14	7.85961	8.71377	-0.854164
221488_s_at	8.04961e-17	9.51393	10.5547	-1.04073								208662_s_at	1.14031e-14	8.87367	10.0444	-1.17077
202435_s_at	8.10621e-17	9.57287	7.62194	1.95093								219625_s_at	1.15141e-14	9.69627	8.75821	0.93806
203919_at	8.19449e-17	6.14126	6.97291	-0.831649								202912_at	1.16175e-14	11.7119	10.0064	1.70558
209286_at	8.41628e-17	11.222	10.1443	1.07766								202645_s_at	1.17587e-14	7.43966	8.43581	-0.996149
212812_at	8.48598e-17	8.12371	9.31776	-1.19405								200925_at	1.17591e-14	11.3474	10.6868	0.660626
207541_s_at	8.49745e-17	7.92757	8.88792	-0.960344								57540_at	1.18217e-14	6.01387	5.43687	0.576998
210439_at	8.5192e-17	5.32601	6.09507	-0.769051								220642_x_at	1.19048e-14	7.52855	8.30455	-0.776001
206965_at	8.64848e-17	4.98066	6.50971	-1.52905								204152_s_at	1.19972e-14	7.22904	8.13494	-0.905907
217466_x_at	8.64958e-17	10.6118	11.3465	-0.734618								211549_s_at	1.20262e-14	5.9131	4.38094	1.53217
217143_s_at	8.79335e-17	7.59568	9.90736	-2.31168								212695_at	1.22549e-14	7.1056	7.60903	-0.503431
210356_x_at	9.04735e-17	7.26795	9.09607	-1.82811								202054_s_at	1.22776e-14	7.24059	7.89498	-0.654392
207387_s_at	9.12138e-17	9.71191	7.94318	1.76873								216383_at	1.22885e-14	8.5544	9.16775	-0.613341
200999_s_at	9.14921e-17	11.5761	10.1667	1.40934								211929_at	1.23623e-14	8.3058	9.47182	-1.16601
204328_at	9.29167e-17	9.19795	10.1782	-0.980219								208129_x_at	1.23802e-14	6.25151	5.71668	0.534825
212706_at	9.52003e-17	5.99113	7.98622	-1.99509								200754_x_at	1.2403e-14	9.95436	10.8952	-0.940798
209740_s_at	9.58091e-17	4.22557	4.77622	-0.550647								222279_at	1.25451e-14	6.7726	7.7864	-1.0138
213266_at	9.79571e-17	6.39736	7.05674	-0.659376								218327_s_at	1.25965e-14	8.48848	7.60593	0.882558
220068_at	1.00965e-16	6.15955	7.68302	-1.52347								202715_at	1.262e-14	7.19406	8.02053	-0.826469
219864_s_at	1.01099e-16	4.59824	5.29726	-0.699013								206545_at	1.29332e-14	5.7781	7.39501	-1.61691
218204_s_at	1.02946e-16	6.86259	7.66913	-0.806541								203725_at	1.30563e-14	9.29858	7.36255	1.93603
213090_s_at	1.03793e-16	6.75749	8.13773	-1.38024								204635_at	1.31597e-14	7.33356	8.58363	-1.25007
202641_at	1.05219e-16	7.55251	6.63297	0.91954								213538_at	1.3297e-14	7.03937	7.78232	-0.742956
221516_s_at	1.06719e-16	8.55543	9.22571	-0.670273								205583_s_at	1.33733e-14	6.74897	7.95599	-1.20702
213034_at	1.08576e-16	8.6148	9.22546	-0.610661								214150_x_at	1.34609e-14	11.6715	11.1805	0.491043
213048_s_at	1.09043e-16	10.3558	11.1395	-0.78376								212734_x_at	1.3479e-14	13.5577	14.0754	-0.517658
212115_at	1.11263e-16	7.66184	8.29966	-0.637817								202050_s_at	1.35318e-14	6.59891	7.23199	-0.633082
208336_s_at	1.11601e-16	8.34286	9.4162	-1.07334								211816_x_at	1.37615e-14	8.43883	7.02418	1.41465
203140_at	1.12999e-16	12.9724	11.9755	0.996902								217122_s_at	1.38306e-14	10.4372	11.1842	-0.747046
214276_at	1.15854e-16	5.54983	6.17159	-0.621752								213588_x_at	1.39605e-14	12.3434	13.1017	-0.758311
209583_s_at	1.16224e-16	4.79183	6.09168	-1.29985								212062_at	1.39755e-14	8.85536	6.74957	2.10579
209330_s_at	1.17681e-16	8.647	9.86307	-1.21607								212326_at	1.40763e-14	7.29665	7.99154	-0.694889
209473_at	1.1773e-16	10.2672	9.26011	1.00706								213135_at	1.40936e-14	7.87533	9.31328	-1.43795
208857_s_at	1.1833e-16	9.40071	8.05271	1.348								212422_at	1.40998e-14	7.01432	7.77664	-0.762319
201024_x_at	1.18586e-16	8.60078	9.34899	-0.748212								202179_at	1.4165e-14	6.57521	7.51414	-0.938931
200772_x_at	1.19557e-16	11.355	12.3287	-0.973725								203098_at	1.42159e-14	7.12626	7.70864	-0.582387
52159_at	1.19953e-16	7.37716	7.90712	-0.529956								202155_s_at	1.42586e-14	10.9241	10.052	0.872102
222133_s_at	1.19992e-16	9.47235	8.66951	0.802842								209619_at	1.43772e-14	12.572	13.8331	-1.26112
219168_s_at	1.20739e-16	7.02263	8.23747	-1.21484								214060_at	1.44784e-14	5.30913	5.9291	-0.619972
204883_s_at	1.20752e-16	7.58534	7.06431	0.521021								200692_s_at	1.46571e-14	7.44128	8.54044	-1.09916
212621_at	1.20964e-16	5.5467	6.72005	-1.17335								204615_x_at	1.47154e-14	9.63575	8.02458	1.61117
212734_x_at	1.22329e-16	13.4109	14.0754	-0.664471								207425_s_at	1.47684e-14	6.41265	7.67951	-1.26687
220353_at	1.22734e-16	4.93897	5.47623	-0.537261								203026_at	1.4972e-14	6.71499	7.27338	-0.558383
220040_x_at	1.23133e-16	6.39787	6.84815	-0.450279								222132_s_at	1.50174e-14	6.8921	7.58221	-0.690106
201092_at	1.24182e-16	8.44147	9.33675	-0.895285								219168_s_at	1.51173e-14	7.06537	8.23747	-1.1721
205922_at	1.26337e-16	12.9028	11.5854	1.31743								218477_at	1.51963e-14	5.56723	6.51559	-0.948359
214756_x_at	1.30364e-16	7.91912	8.46596	-0.546842								222101_s_at	1.53352e-14	5.93529	7.09024	-1.15496
216902_s_at	1.31034e-16	5.65334	6.45325	-0.799904								207760_s_at	1.54697e-14	8.88529	9.75436	-0.86907
203569_s_at	1.34623e-16	8.11169	8.86949	-0.757794								202804_at	1.59918e-14	8.15875	8.9047	-0.745949
217957_at	1.34962e-16	8.44704	9.22365	-0.776618								218165_at	1.59948e-14	8.18388	9.0339	-0.850012
205603_s_at	1.35231e-16	8.23358	7.30425	0.92933								207416_s_at	1.61863e-14	7.66903	8.29909	-0.630056
219947_at	1.37024e-16	10.2837	9.099	1.18474								214049_x_at	1.64705e-14	8.06075	9.63917	-1.57842
210347_s_at	1.39461e-16	7.59978	8.67187	-1.07209								213263_s_at	1.65496e-14	8.48549	9.36279	-0.877297
211375_s_at	1.416e-16	8.32986	9.31883	-0.988974								208304_at	1.66582e-14	7.1146	9.69283	-2.57824
204129_at	1.41622e-16	6.36822	6.84418	-0.475958								212459_x_at	1.6695e-14	6.508	7.92319	-1.41519
202643_s_at	1.43371e-16	9.82536	8.7304	1.09495								215078_at	1.71515e-14	5.82775	4.49697	1.33079
218584_at	1.44549e-16	6.36503	7.18426	-0.819226								200631_s_at	1.71697e-14	9.81421	10.696	-0.881784
208066_s_at	1.44591e-16	9.2511	8.14175	1.10935								218788_s_at	1.72373e-14	6.34039	7.17353	-0.83314
221484_at	1.45064e-16	11.3481	9.80965	1.53848								214835_s_at	1.76311e-14	6.32783	7.6767	-1.34887
201488_x_at	1.45752e-16	9.84104	10.48	-0.638917								218626_at	1.77393e-14	8.09876	8.66491	-0.566144
205933_at	1.46052e-16	5.79881	6.7314	-0.932584								214496_x_at	1.77993e-14	6.255	7.06152	-0.80652
218306_s_at	1.46233e-16	9.10584	9.93354	-0.827699								205977_s_at	1.80007e-14	6.4421	7.27218	-0.830084
214698_at	1.48041e-16	6.6505	6.05521	0.595294								202305_s_at	1.82879e-14	8.604	7.91004	0.693961
222013_x_at	1.48917e-16	6.45298	7.14331	-0.690327								204573_at	1.87156e-14	6.03516	6.48319	-0.448033
218140_x_at	1.50573e-16	7.35781	8.23436	-0.876548								201321_s_at	1.87756e-14	8.63846	9.57772	-0.939263
201536_at	1.51437e-16	9.85471	8.72049	1.13423								218556_at	1.88113e-14	9.91867	9.25293	0.665738
203396_at	1.53583e-16	9.10444	7.42789	1.67655								208635_x_at	1.88717e-14	13.0052	13.6194	-0.614119
203380_x_at	1.54329e-16	9.38137	10.6426	-1.26123								213785_at	1.89118e-14	5.70608	6.35897	-0.652891
206790_s_at	1.5452e-16	9.45672	8.10217	1.35455								217094_s_at	1.92062e-14	7.41095	6.74726	0.663682
202576_s_at	1.55783e-16	7.61938	8.11296	-0.493576								206188_at	1.93367e-14	4.80731	5.59762	-0.790311
204833_at	1.57287e-16	7.29619	6.60989	0.686306								213540_at	1.99123e-14	6.78172	7.70049	-0.918768
201076_at	1.58212e-16	8.45405	9.13478	-0.680731								205036_at	1.99238e-14	9.09642	8.22522	0.871203
218500_at	1.59882e-16	6.01824	6.74732	-0.729081								201517_at	2.05498e-14	6.69901	7.66955	-0.970538
219443_at	1.60144e-16	5.00553	5.74668	-0.741148								203534_at	2.06888e-14	8.65093	7.80195	0.84898
213367_at	1.61887e-16	6.70438	7.18423	-0.47985								202064_s_at	2.07669e-14	7.04772	6.42014	0.627575
214241_at	1.6285e-16	7.37864	8.37539	-0.996748								221142_s_at	2.09422e-14	6.8198	5.92067	0.899131
212272_at	1.64045e-16	5.32424	6.10116	-0.77692								217740_x_at	2.09929e-14	13.0956	13.6378	-0.542143
218184_at	1.64288e-16	5.81267	6.79652	-0.983854								207170_s_at	2.10771e-14	8.34569	9.06128	-0.715591
202730_s_at	1.6447e-16	7.76085	8.73215	-0.971298								214298_x_at	2.18666e-14	9.36259	10.4471	-1.08448
216457_s_at	1.67106e-16	10.228	11.1043	-0.876246								203737_s_at	2.20007e-14	6.73564	7.55175	-0.816107
221053_s_at	1.67267e-16	4.09459	4.55755	-0.462952								205831_at	2.21722e-14	9.3287	10.824	-1.49526
202724_s_at	1.68036e-16	7.42286	8.52541	-1.10254								212247_at	2.21745e-14	6.91546	7.904	-0.988541
218104_at	1.70048e-16	7.04837	7.71445	-0.666078								200763_s_at	2.22114e-14	13.6885	14.0822	-0.393704
210288_at	1.7093e-16	7.06174	8.24162	-1.17988								201677_at	2.22276e-14	6.53113	7.37058	-0.839455
201080_at	1.73443e-16	8.07792	8.84195	-0.764032								202783_at	2.25273e-14	6.99707	7.80271	-0.805647
38398_at	1.74163e-16	7.89476	8.36873	-0.473969								215605_at	2.25364e-14	9.25182	8.52281	0.729015
216570_x_at	1.76931e-16	9.60571	10.5065	-0.900793								209579_s_at	2.26182e-14	10.3437	9.79743	0.54622
205135_s_at	1.89366e-16	4.16226	4.93083	-0.768565								217734_s_at	2.28928e-14	8.61362	9.47835	-0.864727
214337_at	1.90025e-16	4.57231	3.92535	0.646954								205763_s_at	2.32886e-14	6.59419	7.37644	-0.782249
216843_x_at	1.94302e-16	7.55274	8.20146	-0.648724								221270_s_at	2.3733e-14	6.0955	6.88259	-0.787094
206220_s_at	1.9781e-16	6.58248	7.49106	-0.90858								211714_x_at	2.44345e-14	9.87854	10.7848	-0.906273
209418_s_at	1.98829e-16	9.86971	9.11653	0.753176								209312_x_at	2.45085e-14	12.1327	13.2776	-1.14486
213122_at	2.00968e-16	4.67925	5.22833	-0.549085								216667_at	2.45645e-14	7.71367	6.27479	1.43888
221688_s_at	2.03615e-16	8.43869	9.38046	-0.941769								213572_s_at	2.46973e-14	11.6996	10.3661	1.33352
216384_x_at	2.0438e-16	10.7122	11.5206	-0.808345								207266_x_at	2.47022e-14	11.561	10.5828	0.978267
222297_x_at	2.04569e-16	5.74757	6.52898	-0.781411								210498_at	2.479e-14	3.9405	3.53485	0.405645
200921_s_at	2.09419e-16	11.7781	12.726	-0.94791								218428_s_at	2.48531e-14	6.12766	7.20295	-1.07529
218607_s_at	2.0946e-16	7.30573	8.06264	-0.75691								218383_at	2.48839e-14	10.761	9.61374	1.14723
219890_at	2.10181e-16	7.86574	5.49886	2.36688								209026_x_at	2.50634e-14	9.70693	10.5684	-0.861505
209139_s_at	2.11117e-16	6.8335	7.7913	-0.957799								208583_x_at	2.53872e-14	8.54958	7.90114	0.648444
205202_at	2.12853e-16	10.0975	8.73203	1.36543								203678_at	2.56046e-14	6.03981	7.09944	-1.05962
58696_at	2.1428e-16	9.63371	8.08011	1.5536								208898_at	2.56478e-14	9.39955	8.16202	1.23753
213333_at	2.1506e-16	7.09725	7.68678	-0.589528								209663_s_at	2.57895e-14	6.47002	5.06316	1.40686
40149_at	2.16294e-16	7.25604	7.85379	-0.597754								202880_s_at	2.57954e-14	9.90316	10.5386	-0.635456
222279_at	2.16664e-16	6.82295	7.7864	-0.963456								215796_at	2.59253e-14	4.42957	5.84638	-1.41681
204396_s_at	2.17655e-16	7.41066	8.34847	-0.937813								203127_s_at	2.6475e-14	9.83797	8.75146	1.0865
201921_at	2.23015e-16	11.4679	9.69539	1.77248								204031_s_at	2.65186e-14	12.8254	13.3977	-0.572278
209868_s_at	2.24474e-16	11.4306	10.6046	0.826031								203297_s_at	2.66518e-14	9.54517	10.4967	-0.951534
219077_s_at	2.32617e-16	5.98883	6.86247	-0.873636								210470_x_at	2.71843e-14	9.08233	9.89195	-0.809624
52940_at	2.33088e-16	8.87465	10.027	-1.15233								202548_s_at	2.73124e-14	8.51389	9.15733	-0.64344
202110_at	2.35251e-16	8.75408	6.50668	2.2474								205718_at	2.77025e-14	8.07736	9.24204	-1.16469
210062_s_at	2.36799e-16	6.25261	7.24362	-0.991005								201674_s_at	2.80436e-14	7.38112	8.38138	-1.00026
202687_s_at	2.38092e-16	10.7238	9.08378	1.63998								217957_at	2.80802e-14	8.36561	9.22365	-0.85805
219690_at	2.42584e-16	10.1146	9.20887	0.905691								219405_at	2.83707e-14	6.99043	7.82494	-0.834509
201163_s_at	2.43171e-16	9.57587	7.95062	1.62525								214752_x_at	2.84429e-14	10.3734	11.3357	-0.962331
206361_at	2.49958e-16	6.71109	8.39404	-1.68295								57516_at	2.88328e-14	6.00713	6.60016	-0.593033
211071_s_at	2.52441e-16	6.90321	7.77048	-0.867268								218279_s_at	2.89155e-14	5.67221	4.63254	1.03967
211152_s_at	2.53664e-16	8.54023	7.9073	0.632923								218552_at	2.90478e-14	8.14551	9.20582	-1.0603
211937_at	2.54615e-16	9.62202	10.3609	-0.738848								202906_s_at	2.95036e-14	8.98482	7.691	1.29381
213205_s_at	2.62207e-16	7.83061	8.47792	-0.647307								209494_s_at	2.96424e-14	6.82815	7.61568	-0.787527
218573_at	2.64483e-16	6.01844	6.83423	-0.815793								218551_at	2.9985e-14	9.06717	8.50243	0.564739
200955_at	2.66125e-16	8.98026	9.62077	-0.640509								221250_s_at	2.9993e-14	8.4892	7.81077	0.678433
218957_s_at	2.66765e-16	7.154	7.99785	-0.843848								203690_at	3.03663e-14	7.24927	8.45779	-1.20852
39835_at	2.68832e-16	8.44201	9.22597	-0.783957								219988_s_at	3.07807e-14	8.97741	9.53592	-0.558508
208510_s_at	2.71538e-16	5.19041	4.27525	0.915158								201991_s_at	3.08141e-14	10.4572	9.90511	0.552135
222285_at	2.74536e-16	6.29632	7.74423	-1.44792								206608_s_at	3.11478e-14	5.74563	6.63395	-0.888326
214522_x_at	2.75852e-16	7.04828	5.87871	1.16957								208804_s_at	3.12348e-14	9.10237	9.9798	-0.877426
202863_at	2.81637e-16	9.45126	8.60144	0.84982								212825_at	3.14552e-14	6.412	7.44072	-1.02872
204899_s_at	2.85133e-16	6.82245	5.83701	0.985441								215716_s_at	3.151e-14	7.1839	8.54987	-1.36597
218183_at	2.87974e-16	6.08901	6.73637	-0.647361								212956_at	3.15849e-14	6.79649	8.44276	-1.64627
203737_s_at	2.91551e-16	6.70178	7.55175	-0.849968								220692_at	3.16329e-14	6.38274	7.08075	-0.69801
213643_s_at	2.92427e-16	6.12359	6.78657	-0.662985								211554_s_at	3.19246e-14	7.60216	6.86081	0.74135
200738_s_at	2.93555e-16	12.9751	12.3522	0.622904								221688_s_at	3.19781e-14	8.6094	9.38046	-0.771067
217773_s_at	2.94897e-16	9.70032	7.48893	2.21139								206347_at	3.22561e-14	5.91462	5.23088	0.683735
206359_at	2.97217e-16	8.70196	7.0879	1.61406								200594_x_at	3.22958e-14	10.7193	11.4884	-0.769136
202970_at	3.00216e-16	6.38781	7.04179	-0.653984								212145_at	3.23709e-14	7.92152	8.71907	-0.797545
219625_s_at	3.00472e-16	9.65496	8.75821	0.896756								211000_s_at	3.28621e-14	5.68076	4.87298	0.807779
202084_s_at	3.10833e-16	11.5449	12.5169	-0.971973								222266_at	3.29418e-14	7.0117	8.21701	-1.20531
202330_s_at	3.13525e-16	5.70833	6.73285	-1.02452								214427_at	3.37266e-14	7.89725	8.62727	-0.730013
206074_s_at	3.14814e-16	8.64814	9.4273	-0.779165								34408_at	3.41465e-14	8.31183	7.48968	0.822152
219451_at	3.23341e-16	8.82743	7.4003	1.42713								201935_s_at	3.43033e-14	8.82682	8.0282	0.798622
212933_x_at	3.26478e-16	12.3113	12.9783	-0.667041								202649_x_at	3.47592e-14	12.4934	13.1839	-0.69051
202022_at	3.30206e-16	7.61758	8.5772	-0.959622								39835_at	3.55254e-14	8.44046	9.22597	-0.785507
200819_s_at	3.30771e-16	13.5495	14.0733	-0.523848								208625_s_at	3.57679e-14	8.38616	9.07082	-0.684667
212191_x_at	3.38264e-16	12.6351	13.5971	-0.961976								217883_at	3.57717e-14	11.3352	10.3952	0.93995
203038_at	3.40941e-16	4.152	4.98408	-0.832079								210006_at	3.58789e-14	7.01791	8.03577	-1.01786
207691_x_at	3.48327e-16	9.03088	7.93233	1.09856								221940_at	3.59195e-14	5.85639	6.48201	-0.625618
218210_at	3.50162e-16	7.59539	8.42916	-0.833766								212395_s_at	3.59215e-14	5.7695	6.25647	-0.486969
210976_s_at	3.55959e-16	6.69366	7.4351	-0.741434								213093_at	3.61318e-14	6.94583	8.19597	-1.25014
219997_s_at	3.57495e-16	7.55571	8.11905	-0.563344								202978_s_at	3.63159e-14	5.45677	6.3309	-0.874134
205841_at	3.58572e-16	7.10669	5.40811	1.69859								201115_at	3.66756e-14	7.23408	8.02629	-0.792212
208794_s_at	3.59177e-16	8.31696	9.27563	-0.958675								218062_x_at	3.69762e-14	8.03553	7.52946	0.506067
220450_at	3.61738e-16	5.55615	4.60492	0.951232								202101_s_at	3.73769e-14	9.58865	8.55458	1.03407
217810_x_at	3.62252e-16	7.87566	8.67523	-0.799567								201656_at	3.74408e-14	6.27707	7.61533	-1.33826
210949_s_at	3.67261e-16	10.4343	11.536	-1.10167								212015_x_at	3.78422e-14	9.60106	10.4113	-0.810242
222192_s_at	3.81688e-16	5.91568	6.64925	-0.733566								214790_at	3.78904e-14	5.60197	6.65518	-1.0532
204565_at	3.85903e-16	7.57697	6.66032	0.916658								59625_at	3.82637e-14	5.80565	5.27456	0.531084
205689_at	3.95439e-16	5.65944	6.46101	-0.801575								214626_s_at	3.87812e-14	8.26665	9.471	-1.20435
219334_s_at	3.99184e-16	6.14003	4.6033	1.53673								200945_s_at	3.89397e-14	9.44834	10.4166	-0.968231
208447_s_at	4.01042e-16	5.77992	6.5623	-0.782387								202971_s_at	3.92387e-14	6.95241	8.39869	-1.44628
209103_s_at	4.01731e-16	9.75808	9.16598	0.592105								201765_s_at	3.98064e-14	8.47518	9.15436	-0.679176
205016_at	4.10984e-16	8.74946	7.32405	1.42541								201688_s_at	3.98943e-14	5.69509	7.21025	-1.51515
205119_s_at	4.13665e-16	14.2232	13.6926	0.530611								220404_at	4.0481e-14	10.9985	9.60957	1.38889
219024_at	4.16509e-16	7.32491	8.61383	-1.28892								206111_at	4.06388e-14	11.2239	8.95092	2.27295
201433_s_at	4.17128e-16	9.7461	10.396	-0.649932								210992_x_at	4.08823e-14	11.932	11.0526	0.879455
204593_s_at	4.28605e-16	6.8847	7.73634	-0.85164								210202_s_at	4.09933e-14	7.81201	8.83301	-1.021
222120_at	4.34916e-16	6.10591	6.56081	-0.454904								211954_s_at	4.10575e-14	6.77931	7.75162	-0.972305
220237_at	4.38435e-16	5.47207	4.46033	1.01175								214061_at	4.11527e-14	5.66074	6.60124	-0.940506
218852_at	4.41282e-16	9.63114	8.51584	1.1153								203454_s_at	4.12287e-14	9.35019	8.52276	0.827434
201400_at	4.45682e-16	12.5291	11.8807	0.648436								211874_s_at	4.15664e-14	6.05061	6.97773	-0.927116
46665_at	4.46855e-16	7.01087	7.84536	-0.834491								202462_s_at	4.16098e-14	9.33855	9.90905	-0.570498
214908_s_at	4.48436e-16	5.88429	6.87221	-0.98792								221650_s_at	4.16099e-14	7.1683	6.41994	0.748356
208304_at	4.48631e-16	7.16554	9.69283	-2.5273								202042_at	4.16172e-14	8.18405	8.72181	-0.537767
204655_at	4.50915e-16	9.80386	11.2382	-1.43436								65585_at	4.18471e-14	5.92496	6.88806	-0.963097
209161_at	4.52175e-16	8.15807	8.69195	-0.533882								203084_at	4.27237e-14	6.07925	5.48576	0.593492
219777_at	4.53016e-16	9.29388	10.3469	-1.05306								202010_s_at	4.31262e-14	8.98975	8.43762	0.552138
203430_at	4.54132e-16	10.4201	9.5078	0.912285								200875_s_at	4.32888e-14	8.3897	9.38273	-0.993028
218017_s_at	4.57431e-16	8.81316	9.7888	-0.975643								208981_at	4.33368e-14	10.7409	11.7102	-0.969322
38521_at	4.57799e-16	8.38822	9.35389	-0.965676								209320_at	4.42649e-14	7.14189	6.20012	0.94176
204562_at	4.58834e-16	6.76665	7.94019	-1.17354								201179_s_at	4.44138e-14	8.68311	7.80142	0.881696
209381_x_at	4.64149e-16	7.42385	8.37645	-0.952598								219175_s_at	4.44474e-14	7.2819	7.90118	-0.619273
212657_s_at	4.70362e-16	12.2228	11.0062	1.21661								40189_at	4.50306e-14	9.1639	10.1303	-0.96644
204912_at	4.70747e-16	10.5848	11.4698	-0.884916								36865_at	4.5185e-14	6.17312	6.67323	-0.500111
210218_s_at	4.7385e-16	7.91035	6.80341	1.10694								63009_at	4.54262e-14	5.94214	6.33477	-0.392634
219513_s_at	4.74402e-16	5.23263	5.94302	-0.710395								204912_at	4.5873e-14	10.6404	11.4698	-0.829401
202246_s_at	4.78296e-16	7.80904	8.69453	-0.885488								204334_at	4.61608e-14	10.1103	9.21213	0.898185
203404_at	4.78733e-16	4.93719	5.81068	-0.873491								201602_s_at	4.62238e-14	8.85865	7.9827	0.875949
203952_at	4.86825e-16	9.45002	8.8551	0.594915								208881_x_at	4.6396e-14	9.65293	7.93658	1.71635
202100_at	4.89124e-16	11.4354	10.609	0.826345								201010_s_at	4.64083e-14	13.5147	13.9476	-0.43299
210137_s_at	4.90725e-16	7.79881	8.65912	-0.860313								203819_s_at	4.6609e-14	6.19999	4.65358	1.54641
210784_x_at	4.96375e-16	11.8293	10.9635	0.865824								218131_s_at	4.70834e-14	9.99469	10.7819	-0.787165
207628_s_at	4.99321e-16	8.12249	8.96972	-0.847227								200682_s_at	4.7293e-14	10.7075	10.3205	0.386953
52731_at	4.99588e-16	6.69811	7.35966	-0.661544								204718_at	4.74387e-14	6.72981	7.70255	-0.972739
215133_s_at	5.00744e-16	5.07255	6.10527	-1.03271								216274_s_at	4.74418e-14	10.2117	9.53046	0.68123
203313_s_at	5.0485e-16	6.4499	7.62042	-1.17051								218154_at	4.83819e-14	9.97743	9.14866	0.828773
218165_at	5.19242e-16	8.0746	9.0339	-0.959298								218391_at	4.85535e-14	9.17848	8.73177	0.446714
204513_s_at	5.21067e-16	8.27444	9.29369	-1.01925								212740_at	4.92672e-14	7.4233	8.24202	-0.818722
210616_s_at	5.39577e-16	8.69164	9.42945	-0.737808								204075_s_at	4.92854e-14	3.80662	4.72024	-0.913616
208499_s_at	5.62497e-16	6.54375	5.50043	1.04333								212517_at	4.95416e-14	5.46134	6.06691	-0.605573
213398_s_at	5.71453e-16	8.57893	9.46923	-0.890295								211744_s_at	4.95749e-14	8.87224	7.18372	1.68852
221780_s_at	5.80933e-16	7.86004	8.47323	-0.613192								202252_at	5.03896e-14	8.28276	7.06369	1.21907
203082_at	5.95506e-16	7.43697	8.06131	-0.624332								208880_s_at	5.1531e-14	8.85955	9.71026	-0.850716
219751_at	5.9941e-16	5.75337	6.77192	-1.01855								201104_x_at	5.15327e-14	10.4416	11.1827	-0.741146
211180_x_at	6.00467e-16	6.19741	5.36989	0.827524								210543_s_at	5.31929e-14	7.17313	8.41419	-1.24107
219988_s_at	6.04747e-16	8.96352	9.53592	-0.572398								206208_at	5.34314e-14	9.51823	7.81947	1.69875
200594_x_at	6.09396e-16	10.7597	11.4884	-0.728682								206337_at	5.35543e-14	9.22171	10.9889	-1.7672
209068_at	6.12087e-16	7.48336	8.51584	-1.03247								218838_s_at	5.39881e-14	7.97262	8.54967	-0.577052
208674_x_at	6.20473e-16	9.46559	10.0719	-0.606308								209627_s_at	5.47486e-14	5.98248	7.07673	-1.09424
212315_s_at	6.23426e-16	7.27198	8.08877	-0.816786								218768_at	5.49666e-14	6.81259	7.63905	-0.826458
212638_s_at	6.24531e-16	8.28458	9.23208	-0.947507								212053_at	5.55654e-14	7.90006	8.54507	-0.645008
210802_s_at	6.25471e-16	5.8401	6.66119	-0.821089								211034_s_at	5.57955e-14	7.50024	8.16179	-0.661547
218402_s_at	6.30558e-16	6.1955	6.87159	-0.676092								218130_at	5.58125e-14	11.0681	10.3073	0.760826
200049_at	6.33769e-16	8.87183	9.50475	-0.632914								213398_s_at	5.75737e-14	8.72817	9.46923	-0.741056
216331_at	6.35925e-16	7.63009	5.77924	1.85085								215773_x_at	5.7894e-14	6.33488	6.89037	-0.555489
208907_s_at	6.3944e-16	7.34821	8.14995	-0.801743								200029_at	5.82275e-14	13.1253	13.6656	-0.540328
221765_at	6.41955e-16	7.13956	4.87261	2.26695								206361_at	5.83943e-14	6.68797	8.39404	-1.70608
211087_x_at	6.4379e-16	8.57284	6.98749	1.58535								202730_s_at	5.86165e-14	7.79675	8.73215	-0.935399
201614_s_at	6.52854e-16	7.29584	8.1362	-0.840361								214130_s_at	5.94788e-14	4.4411	5.39265	-0.95155
203660_s_at	6.66562e-16	7.81664	8.52954	-0.712897								208206_s_at	6.06588e-14	9.49541	10.6897	-1.19433
205246_at	6.69233e-16	5.62481	4.93867	0.686139								203118_at	6.09896e-14	8.80508	9.68883	-0.883749
203263_s_at	6.74214e-16	5.1952	5.95545	-0.760251								200735_x_at	6.11508e-14	12.8534	13.4369	-0.58351
206478_at	6.75117e-16	5.93785	7.2978	-1.35994								44040_at	6.17898e-14	6.50912	7.21072	-0.701601
220739_s_at	6.82242e-16	7.75024	8.73332	-0.983084								211953_s_at	6.19453e-14	5.35829	6.61969	-1.26141
212723_at	6.97596e-16	9.21634	8.35593	0.860404								1405_i_at	6.27632e-14	10.9716	12.1425	-1.17087
215376_at	6.99102e-16	5.44407	6.20844	-0.764374								215454_x_at	6.31005e-14	6.45769	5.83856	0.619133
218357_s_at	7.02834e-16	9.03909	7.45081	1.58828								201541_s_at	6.31484e-14	9.55076	8.95083	0.599927
203081_at	7.06343e-16	7.74499	8.20153	-0.456541								212413_at	6.39452e-14	6.91127	8.0196	-1.10834
215031_x_at	7.13394e-16	6.94163	7.48748	-0.545854								219149_x_at	6.43991e-14	5.91076	6.41234	-0.50158
209960_at	7.1581e-16	5.83494	3.43043	2.40451								212711_at	6.46835e-14	5.44142	5.95439	-0.512969
203534_at	7.16423e-16	8.8612	7.80195	1.05925								200950_at	6.46992e-14	10.2483	9.62322	0.625104
219034_at	7.20119e-16	7.28539	7.98271	-0.69732								204198_s_at	6.47789e-14	9.50007	10.7072	-1.20711
218838_s_at	7.20188e-16	7.97529	8.54967	-0.574384								215262_at	6.52921e-14	4.23665	5.70148	-1.46483
217789_at	7.21591e-16	10.0494	9.5614	0.488017								202704_at	6.62572e-14	7.48001	8.90478	-1.42476
219566_at	7.37809e-16	7.19937	8.1062	-0.906829								210205_at	6.69418e-14	8.80111	8.20659	0.594513
217990_at	7.43901e-16	9.98151	9.35309	0.628422								218210_at	6.7679e-14	7.57733	8.42916	-0.851825
205842_s_at	7.53615e-16	8.92162	7.28837	1.63325								218302_at	6.77668e-14	9.55183	8.83442	0.717405
208880_s_at	7.82366e-16	8.94985	9.71026	-0.760416								200715_x_at	6.8633e-14	11.5798	12.4178	-0.838036
209410_s_at	8.0957e-16	8.29434	6.72681	1.56754								212454_x_at	6.9007e-14	8.90671	9.97773	-1.07102
222243_s_at	8.10013e-16	7.1529	8.12549	-0.972587								218175_at	6.93167e-14	8.42248	9.50553	-1.08306
214686_at	8.24757e-16	8.43397	9.61118	-1.17721								207572_at	6.93931e-14	4.55523	3.87601	0.679225
211954_s_at	8.24825e-16	6.83817	7.75162	-0.913444								218568_at	6.99273e-14	4.47207	5.30245	-0.830378
214661_s_at	8.25132e-16	6.5367	7.18313	-0.646431								205987_at	6.99842e-14	6.93015	7.83488	-0.904731
217408_at	8.36954e-16	8.21781	8.98706	-0.769245								203034_s_at	7.0262e-14	13.1346	13.6707	-0.536169
208716_s_at	8.42809e-16	8.195	6.65733	1.53767								216585_at	7.03581e-14	4.60713	4.16579	0.441336
211783_s_at	8.49288e-16	7.17325	8.42276	-1.24951								204220_at	7.1467e-14	11.4392	10.3243	1.11498
216380_x_at	8.53541e-16	8.98976	9.78948	-0.799717								212010_s_at	7.21093e-14	10.4736	11.0665	-0.592896
219714_s_at	8.55835e-16	5.9831	7.28109	-1.29798								210813_s_at	7.23173e-14	5.04439	4.17732	0.86707
203026_at	8.59655e-16	6.66469	7.27338	-0.608691								201976_s_at	7.32788e-14	5.83674	4.37425	1.46249
211792_s_at	8.63238e-16	6.79725	5.92274	0.874508								205484_at	7.33201e-14	8.04392	9.00474	-0.96082
202727_s_at	8.64105e-16	11.8987	10.5575	1.34115								210247_at	7.35325e-14	7.25946	6.00638	1.25308
220960_x_at	8.67119e-16	10.3906	11.3924	-1.00177								215457_at	7.37365e-14	4.02209	3.38173	0.640355
202326_at	8.68077e-16	6.9086	8.15508	-1.24648								213605_s_at	7.44984e-14	9.62271	10.5787	-0.955994
210415_s_at	8.7587e-16	5.4697	6.00488	-0.535188								219217_at	7.45647e-14	6.09262	6.68624	-0.59362
212904_at	8.86963e-16	9.02212	9.86858	-0.846457								219541_at	7.46467e-14	7.57553	8.48696	-0.911436
201369_s_at	8.89362e-16	8.50795	10.0467	-1.53878								209078_s_at	7.47386e-14	8.58711	8.12803	0.459087
212521_s_at	8.93539e-16	7.35822	7.76697	-0.408748								203748_x_at	7.60257e-14	11.514	10.5628	0.951193
211272_s_at	8.95469e-16	7.21328	8.85718	-1.64389								206752_s_at	7.60522e-14	5.76151	6.59344	-0.83193
204431_at	8.99982e-16	4.93506	5.59405	-0.658997								205603_s_at	7.61427e-14	8.23897	7.30425	0.934723
206759_at	9.16225e-16	5.62856	6.83126	-1.20271								213535_s_at	7.71379e-14	10.2911	10.8692	-0.578138
212415_at	9.18526e-16	9.20684	10.1022	-0.895329								211250_s_at	7.71469e-14	9.73281	8.68594	1.04687
213145_at	9.35695e-16	7.80084	8.67758	-0.876746								219869_s_at	7.73921e-14	7.57141	5.64674	1.92467
217485_x_at	9.64867e-16	7.89657	8.38937	-0.492806								211152_s_at	7.74162e-14	8.46779	7.9073	0.560491
214838_at	9.66819e-16	7.55318	6.6292	0.923977								208580_x_at	7.75938e-14	6.77237	5.8355	0.936864
207939_x_at	9.68066e-16	8.35725	8.7975	-0.440251								201055_s_at	7.8842e-14	6.86325	8.56959	-1.70634
212334_at	9.74174e-16	11.3435	10.543	0.800498								217755_at	7.92012e-14	11.2292	10.4704	0.7588
203782_s_at	1.01249e-15	6.88656	7.97136	-1.08481								217119_s_at	7.96731e-14	5.87909	6.72683	-0.847737
212076_at	1.01678e-15	7.3954	8.57638	-1.18099								203240_at	7.97364e-14	5.94592	7.16704	-1.22112
214255_at	1.0218e-15	6.78364	7.80386	-1.02022								36612_at	7.98448e-14	5.32953	5.92822	-0.598692
200003_s_at	1.04526e-15	13.7713	14.2173	-0.446044								202435_s_at	7.99215e-14	9.48962	7.62194	1.86769
219766_at	1.04581e-15	8.35616	7.73547	0.620691								200691_s_at	8.0267e-14	8.3515	9.27308	-0.921578
204794_at	1.04776e-15	5.6293	6.40538	-0.776084								214756_x_at	8.20955e-14	8.05296	8.46596	-0.413004
217775_s_at	1.04833e-15	8.01529	8.7893	-0.774007								207812_s_at	8.23416e-14	8.38897	9.13367	-0.744694
211977_at	1.05065e-15	7.5364	6.84755	0.688848								203021_at	8.33609e-14	10.2873	8.03672	2.25061
220773_s_at	1.0592e-15	4.22606	4.8212	-0.59515								221205_at	8.36977e-14	7.27083	6.05158	1.21925
202001_s_at	1.06404e-15	8.67765	7.54772	1.12993								213571_s_at	8.44739e-14	9.53589	8.99313	0.542762
204195_s_at	1.06841e-15	7.69845	7.04478	0.65367								212266_s_at	8.46148e-14	9.34119	10.8964	-1.55519
213535_s_at	1.07234e-15	10.1973	10.8692	-0.671925								202269_x_at	8.51473e-14	11.6921	9.74557	1.94657
204346_s_at	1.07249e-15	8.38898	9.15942	-0.770445								205798_at	8.69773e-14	10.5005	12.2324	-1.73193
212348_s_at	1.08005e-15	7.67916	8.2626	-0.583431								219618_at	8.71325e-14	7.77015	6.92269	0.847465
218323_at	1.08847e-15	9.41064	8.1572	1.25344								212826_s_at	8.7319e-14	10.971	12.1425	-1.17151
217809_at	1.09055e-15	8.39041	9.11864	-0.72823								202051_s_at	8.74673e-14	6.11907	6.99206	-0.872991
204355_at	1.09149e-15	7.68976	8.54416	-0.854392								212004_at	8.87677e-14	9.37692	8.88216	0.494756
221869_at	1.0945e-15	4.83202	5.53231	-0.700291								216438_s_at	8.95984e-14	13.4895	13.9776	-0.488054
221004_s_at	1.15781e-15	7.6187	8.6312	-1.0125								209409_at	9.00157e-14	8.08748	6.39246	1.69503
202616_s_at	1.16524e-15	8.43748	9.11004	-0.672563								219100_at	9.11861e-14	8.88888	7.97672	0.912158
201960_s_at	1.16711e-15	10.0886	10.8086	-0.720028								218381_s_at	9.26065e-14	8.69733	9.42007	-0.722749
218735_s_at	1.17289e-15	6.18424	6.86283	-0.678588								213034_at	9.40678e-14	8.58471	9.22546	-0.640748
218259_at	1.18522e-15	5.69302	6.59324	-0.900225								218078_s_at	9.41233e-14	8.68299	7.76755	0.915443
205987_at	1.23443e-15	6.92809	7.83488	-0.906791								202723_s_at	9.47038e-14	8.81113	9.80888	-0.99775
43427_at	1.23666e-15	5.27123	6.02894	-0.75771								211323_s_at	9.50487e-14	6.09453	6.86568	-0.771156
213815_x_at	1.25223e-15	6.74989	7.34893	-0.599039								211583_x_at	9.57708e-14	7.27787	8.35548	-1.07761
202671_s_at	1.27026e-15	9.53948	8.70292	0.836555								213746_s_at	9.68576e-14	9.89263	11.1521	-1.25943
213969_x_at	1.28001e-15	12.3542	13.1643	-0.810117								202969_at	9.87379e-14	6.32773	7.58646	-1.25873
205878_at	1.28883e-15	6.1959	7.14211	-0.946215								218224_at	9.90861e-14	7.11297	8.08111	-0.968135
208897_s_at	1.30104e-15	8.15886	8.7057	-0.546834								208510_s_at	9.98572e-14	5.12986	4.27525	0.854606
214617_at	1.30664e-15	10.637	12.3658	-1.72876								208799_at	1.00313e-13	9.07616	8.538	0.538157
204547_at	1.30848e-15	4.30009	4.99037	-0.690283								39402_at	1.00657e-13	10.7987	9.60885	1.18984
208904_s_at	1.31421e-15	12.9376	13.6981	-0.760471								202631_s_at	1.04574e-13	6.57824	5.64373	0.934514
32541_at	1.31695e-15	6.27954	7.22723	-0.947691								217900_at	1.05411e-13	8.13616	8.79216	-0.655996
210061_at	1.32361e-15	5.57839	6.24895	-0.670563								40225_at	1.06795e-13	9.93173	10.4783	-0.546534
210224_at	1.3243e-15	8.39382	7.56626	0.827564								204327_s_at	1.07228e-13	6.32823	6.99835	-0.670118
222290_at	1.33202e-15	4.3613	5.14408	-0.782781								219419_at	1.0734e-13	7.06329	7.59827	-0.534984
215693_x_at	1.34645e-15	8.28039	8.79141	-0.511017								205067_at	1.08037e-13	11.1519	9.87705	1.27483
202054_s_at	1.3474e-15	7.25231	7.89498	-0.642671								201328_at	1.08943e-13	9.74476	8.45447	1.2903
220035_at	1.37573e-15	8.00413	9.33272	-1.32859								207856_s_at	1.09446e-13	6.88563	7.73509	-0.849461
213572_s_at	1.38742e-15	11.7547	10.3661	1.38861								213587_s_at	1.10087e-13	7.51811	8.66109	-1.14298
204031_s_at	1.40943e-15	12.7405	13.3977	-0.657209								209674_at	1.12289e-13	4.84991	6.17851	-1.3286
204216_s_at	1.43664e-15	7.49788	7.9431	-0.445213								214637_at	1.12841e-13	6.82898	6.01215	0.816821
203800_s_at	1.44241e-15	8.656	8.09592	0.560078								221486_at	1.13303e-13	7.75974	7.16997	0.589773
201031_s_at	1.44338e-15	10.328	11.3635	-1.0355								221141_x_at	1.14074e-13	6.95921	6.38997	0.569242
215314_at	1.44409e-15	5.67324	6.74161	-1.06837								218366_x_at	1.14771e-13	8.59124	9.33541	-0.744174
219859_at	1.44794e-15	8.65462	7.11112	1.5435								211934_x_at	1.14831e-13	8.34453	9.95559	-1.61107
210225_x_at	1.44845e-15	11.9123	11.0593	0.853039								204423_at	1.1554e-13	7.92839	7.2142	0.714184
211135_x_at	1.45541e-15	11.9065	11.0561	0.850422								209798_at	1.16076e-13	6.63141	7.7109	-1.07949
207788_s_at	1.45644e-15	5.41561	6.07723	-0.661613								202104_s_at	1.16436e-13	8.48162	9.29323	-0.81161
215792_s_at	1.47054e-15	7.47406	8.11005	-0.635989								220610_s_at	1.16586e-13	8.18411	7.51134	0.67277
217962_at	1.47592e-15	12.1276	10.9039	1.22369								212539_at	1.16819e-13	8.1457	8.7879	-0.642199
204012_s_at	1.48502e-15	6.90718	7.5473	-0.640121								212085_at	1.1716e-13	11.0509	12.4613	-1.41048
215332_s_at	1.49606e-15	5.82518	7.29195	-1.46677								201162_at	1.17449e-13	8.74511	7.65012	1.09499
219111_s_at	1.50182e-15	6.3589	6.96465	-0.605743								219765_at	1.18467e-13	4.68219	5.62026	-0.938065
201632_at	1.51467e-15	8.82186	9.42365	-0.601782								208914_at	1.18807e-13	7.58922	8.39193	-0.80271
216667_at	1.52383e-15	7.58447	6.27479	1.30967								216920_s_at	1.19513e-13	8.43837	10.3607	-1.92235
213762_x_at	1.54053e-15	9.41687	9.9792	-0.562328								205684_s_at	1.19615e-13	6.45645	7.23889	-0.782442
213460_x_at	1.56653e-15	8.26965	8.98255	-0.712899								201773_at	1.20514e-13	8.42495	9.48395	-1.05901
218279_s_at	1.57151e-15	5.50277	4.63254	0.870231								201164_s_at	1.22103e-13	9.23125	9.80523	-0.573984
200647_x_at	1.5809e-15	10.4187	11.4196	-1.00091								214542_x_at	1.22277e-13	7.56614	7.00603	0.560109
219108_x_at	1.63357e-15	8.23741	8.79594	-0.558531								204795_at	1.22732e-13	6.41975	6.87243	-0.45268
206208_at	1.65141e-15	9.57595	7.81947	1.75647								211721_s_at	1.23117e-13	4.73225	5.67729	-0.945048
212110_at	1.68195e-15	5.42394	6.12165	-0.69771								201027_s_at	1.24187e-13	6.71854	7.4779	-0.759368
202365_at	1.74657e-15	8.2124	9.06324	-0.850836								221090_s_at	1.24809e-13	7.14708	8.44501	-1.29794
208807_s_at	1.77501e-15	8.4789	9.32812	-0.849218								203319_s_at	1.25686e-13	9.84675	9.10436	0.742395
210998_s_at	1.87373e-15	7.00442	5.64412	1.36029								202080_s_at	1.26362e-13	8.31781	8.86141	-0.5436
218121_at	1.87461e-15	7.29362	7.82547	-0.531857								202688_at	1.26787e-13	12.2996	10.9013	1.39834
202631_s_at	1.87665e-15	6.55779	5.64373	0.914061								214352_s_at	1.27444e-13	10.5095	9.63472	0.874814
214351_x_at	1.87736e-15	12.8848	13.5793	-0.694572								201350_at	1.27914e-13	12.4228	11.5081	0.914715
200725_x_at	1.87824e-15	12.8405	13.6048	-0.764323								217791_s_at	1.28112e-13	6.82942	7.52783	-0.698405
209396_s_at	1.88124e-15	7.66082	10.6576	-2.99675								210222_s_at	1.32351e-13	6.86724	8.26331	-1.39607
200925_at	1.90442e-15	11.3861	10.6868	0.699383								204346_s_at	1.36656e-13	8.37535	9.15942	-0.784067
204937_s_at	1.92005e-15	7.96355	8.79124	-0.827685								211392_s_at	1.38079e-13	6.11598	6.65198	-0.536001
218342_s_at	1.95028e-15	6.87477	7.50617	-0.6314								216088_s_at	1.38588e-13	8.77373	8.0484	0.725327
208806_at	1.95319e-15	7.22669	7.95155	-0.724863								204858_s_at	1.389e-13	10.8399	9.36526	1.47468
204900_x_at	1.95566e-15	8.49795	7.14749	1.35046								205418_at	1.39311e-13	10.2571	9.20016	1.05694
200823_x_at	2.01839e-15	12.0776	12.9101	-0.832463								214244_s_at	1.39861e-13	6.6493	5.73787	0.911431
206255_at	2.02013e-15	5.93469	7.44413	-1.50944								217832_at	1.40724e-13	8.00802	9.04776	-1.03974
203117_s_at	2.05343e-15	6.87924	7.62609	-0.746849								200860_s_at	1.41664e-13	9.91273	10.4236	-0.510867
218287_s_at	2.05936e-15	8.19502	8.88314	-0.688123								212348_s_at	1.42256e-13	7.64678	8.2626	-0.61582
218628_at	2.07832e-15	8.27433	7.44632	0.828005								210999_s_at	1.4241e-13	8.08919	6.43227	1.65691
219093_at	2.07891e-15	6.09598	7.47315	-1.37717								208979_at	1.42564e-13	8.43232	9.03668	-0.604367
218482_at	2.0822e-15	8.42364	7.24901	1.17462								210623_at	1.43414e-13	5.88721	5.38328	0.503925
221247_s_at	2.0879e-15	6.98	7.5219	-0.541902								205568_at	1.43459e-13	13.1926	12.239	0.953601
204951_at	2.10477e-15	8.06906	8.9659	-0.896838								200869_at	1.43749e-13	13.0949	13.6496	-0.554622
204571_x_at	2.1148e-15	7.42546	6.80818	0.617282								201277_s_at	1.44834e-13	9.89272	10.6223	-0.72955
200982_s_at	2.15215e-15	9.13719	10.1474	-1.01018								210532_s_at	1.50897e-13	9.11291	7.49754	1.61537
218880_at	2.15509e-15	9.52192	8.34071	1.18121								202784_s_at	1.56573e-13	6.04227	7.07392	-1.03164
201164_s_at	2.16129e-15	9.18913	9.80523	-0.616096								215223_s_at	1.57113e-13	12.9177	11.9244	0.993292
211108_s_at	2.16875e-15	6.29892	5.20611	1.09282								205173_x_at	1.57416e-13	9.48563	8.03398	1.45164
41660_at	2.18739e-15	4.64279	5.1056	-0.462807								205593_s_at	1.58494e-13	4.91724	5.85371	-0.93647
202167_s_at	2.19117e-15	7.7821	8.54527	-0.763171								213347_x_at	1.60735e-13	12.9744	13.7011	-0.726658
217895_at	2.23021e-15	7.55357	8.21564	-0.662068								220890_s_at	1.62819e-13	8.71222	9.51746	-0.805236
201701_s_at	2.23895e-15	5.63191	6.48068	-0.848764								216729_at	1.63674e-13	6.01368	5.43875	0.574925
203825_at	2.24131e-15	9.17826	9.91099	-0.732734								212168_at	1.69475e-13	8.65352	9.38926	-0.735738
37652_at	2.24739e-15	8.86886	9.9884	-1.11954								218670_at	1.70444e-13	6.47697	7.19935	-0.722379
218805_at	2.25281e-15	9.9658	11.0702	-1.10435								208614_s_at	1.71382e-13	7.33934	8.16314	-0.8238
218201_at	2.26208e-15	7.76527	6.78402	0.981254								215322_at	1.73047e-13	7.68778	6.67967	1.00811
219667_s_at	2.3101e-15	6.51001	7.98092	-1.4709								214705_at	1.74615e-13	4.31867	5.71954	-1.40088
217647_at	2.31041e-15	5.00759	5.58461	-0.57702								218310_at	1.74708e-13	9.45739	8.34149	1.1159
206129_s_at	2.31378e-15	6.34526	5.46811	0.877151								218619_s_at	1.75541e-13	7.05542	7.58517	-0.529748
213902_at	2.37195e-15	9.52393	8.62066	0.903272								211569_s_at	1.75808e-13	5.68167	6.46002	-0.77835
209446_s_at	2.37246e-15	7.12591	6.10264	1.02327								208709_s_at	1.80327e-13	10.8075	10.3038	0.503731
202731_at	2.3742e-15	7.55822	8.79119	-1.23297								204777_s_at	1.81138e-13	8.56981	10.1494	-1.57962
212598_at	2.3852e-15	8.01905	6.66403	1.35501								215908_at	1.83223e-13	7.08387	6.58058	0.503288
205419_at	2.38913e-15	6.23306	7.72527	-1.49221								203676_at	1.83455e-13	8.16333	7.05672	1.10661
201991_s_at	2.3952e-15	10.4896	9.90511	0.584452								218817_at	1.84494e-13	6.67323	5.04468	1.62855
200805_at	2.42235e-15	9.85784	9.3644	0.493445								208833_s_at	1.85096e-13	9.12661	9.82968	-0.703072
215773_x_at	2.42775e-15	6.29365	6.89037	-0.596727								220684_at	1.86268e-13	7.41963	8.74942	-1.32979
200597_at	2.44829e-15	6.88362	7.68888	-0.805266								218321_x_at	1.86917e-13	9.55194	8.7172	0.83474
216609_at	2.4624e-15	6.53058	4.9448	1.58579								218153_at	1.91307e-13	10.7007	9.88225	0.818482
208714_at	2.47553e-15	9.37322	10.2176	-0.844405								203833_s_at	1.9232e-13	9.14257	8.42323	0.71934
217657_at	2.49618e-15	5.32573	4.83765	0.488085								209868_s_at	1.92949e-13	11.5887	10.6046	0.984061
205763_s_at	2.50497e-15	6.55031	7.37644	-0.82613								201522_x_at	1.98869e-13	9.51403	10.4728	-0.958741
203112_s_at	2.54661e-15	6.52923	7.32917	-0.799939								202643_s_at	1.989e-13	9.98581	8.7304	1.25541
217593_at	2.55058e-15	6.34522	7.16088	-0.81566								215994_x_at	2.01803e-13	8.05231	8.4889	-0.436595
222067_x_at	2.55737e-15	9.9508	8.93337	1.01743								216782_at	2.01991e-13	11.6105	10.0238	1.58673
219497_s_at	2.58496e-15	6.18246	7.30414	-1.12168								214173_x_at	2.02474e-13	7.09536	7.93536	-0.840004
218949_s_at	2.64619e-15	6.23453	7.03641	-0.801886								221216_s_at	2.02586e-13	6.58758	7.03555	-0.447968
218199_s_at	2.718e-15	6.39073	6.93124	-0.540508								217946_s_at	2.02798e-13	8.16269	8.79683	-0.634142
209992_at	2.75726e-15	8.15663	5.50225	2.65439								218287_s_at	2.04892e-13	8.19639	8.88314	-0.686756
206130_s_at	2.77081e-15	9.55309	8.31686	1.23623								204127_at	2.06733e-13	5.12242	5.93291	-0.810499
201317_s_at	2.84613e-15	9.60903	8.21841	1.39062								218971_s_at	2.06906e-13	6.87353	7.4505	-0.576968
219275_at	2.86056e-15	6.72767	6.13862	0.589055								214615_at	2.08302e-13	4.33104	5.3	-0.968958
215845_x_at	2.87141e-15	5.79577	6.28539	-0.489625								210337_s_at	2.08371e-13	7.76881	8.56159	-0.79278
213341_at	2.87309e-15	7.76801	6.51875	1.24926								201614_s_at	2.08796e-13	7.36978	8.1362	-0.766429
218130_at	2.8989e-15	11.0865	10.3073	0.779236								220009_at	2.12615e-13	6.32441	5.49595	0.828454
213605_s_at	2.90249e-15	9.57466	10.5787	-1.00404								209254_at	2.19413e-13	7.09887	6.47583	0.623034
204448_s_at	2.92098e-15	6.89549	6.40192	0.493574								206444_at	2.23074e-13	6.88654	6.3626	0.523931
217883_at	2.98393e-15	11.3744	10.3952	0.979198								203367_at	2.24521e-13	5.539	6.28898	-0.749979
217118_s_at	2.99743e-15	10.9648	10.1902	0.774644								207988_s_at	2.24858e-13	12.4652	11.9348	0.530394
203858_s_at	3.0139e-15	7.41865	7.89184	-0.473193								76897_s_at	2.2566e-13	5.77296	5.01559	0.757373
219765_at	3.06507e-15	4.77683	5.62026	-0.843426								217534_at	2.26995e-13	6.7101	5.77322	0.936876
201858_s_at	3.06516e-15	13.6365	12.2799	1.35658								213699_s_at	2.27231e-13	10.4687	11.3572	-0.888519
201976_s_at	3.09599e-15	6.18117	4.37425	1.80692								218873_at	2.29151e-13	8.15828	8.67445	-0.516167
205020_s_at	3.10208e-15	8.95032	7.46492	1.4854								219497_s_at	2.30082e-13	6.16463	7.30414	-1.13951
206804_at	3.10614e-15	5.94651	7.2194	-1.27289								209085_x_at	2.30195e-13	7.19892	7.74795	-0.549037
203527_s_at	3.14385e-15	6.33565	5.83982	0.495827								217379_at	2.3339e-13	10.5998	11.3147	-0.714914
201238_s_at	3.15989e-15	10.2937	8.58448	1.70923								203094_at	2.34151e-13	8.91042	8.30718	0.603242
44040_at	3.22201e-15	6.53421	7.21072	-0.676505								201080_at	2.35172e-13	8.03676	8.84195	-0.805195
207559_s_at	3.23931e-15	7.07206	7.79709	-0.725033								220694_at	2.40024e-13	8.3586	7.17273	1.18587
212411_at	3.2983e-15	8.4907	9.24057	-0.749875								219172_at	2.41578e-13	7.07555	6.37709	0.698459
217824_at	3.30268e-15	8.35904	7.09572	1.26333								202719_s_at	2.41586e-13	9.33859	8.72088	0.617707
204064_at	3.31076e-15	7.45264	8.02591	-0.57327								217824_at	2.46638e-13	8.26471	7.09572	1.16899
91684_g_at	3.32693e-15	8.47668	7.2203	1.25638								200859_x_at	2.47229e-13	10.5262	11.4519	-0.925729
218511_s_at	3.33549e-15	6.84443	7.40762	-0.563197								206555_s_at	2.49448e-13	8.06409	8.91828	-0.854193
213848_at	3.39895e-15	7.78995	8.76901	-0.979058								202309_at	2.51202e-13	7.58679	8.40121	-0.814422
214994_at	3.44723e-15	5.86381	5.1519	0.711913								200990_at	2.52582e-13	9.47363	10.5049	-1.03124
204573_at	3.44954e-15	6.04644	6.48319	-0.436759								216342_x_at	2.52722e-13	11.6183	12.5486	-0.930226
208780_x_at	3.47877e-15	11.8498	11.0363	0.813453								214220_s_at	2.57832e-13	5.15431	5.94432	-0.790009
209190_s_at	3.68325e-15	10.3195	11.0256	-0.706133								221837_at	2.57834e-13	5.25722	6.02172	-0.7645
221629_x_at	3.71969e-15	7.02345	7.50464	-0.481195								200725_x_at	2.59323e-13	13.0725	13.6048	-0.532384
211036_x_at	3.82036e-15	10.0994	10.6586	-0.559229								202761_s_at	2.60798e-13	7.63543	9.28613	-1.6507
218882_s_at	3.82481e-15	6.37065	7.3063	-0.935653								201815_s_at	2.63299e-13	6.82189	7.27245	-0.450555
208313_s_at	3.82514e-15	10.1287	10.7423	-0.613578								210678_s_at	2.67089e-13	7.76595	7.06133	0.704624
222280_at	3.83883e-15	5.69377	6.42016	-0.726385								215797_at	2.71454e-13	5.00868	5.70286	-0.694185
201209_at	3.90479e-15	10.3411	11.0303	-0.689275								202679_at	2.71659e-13	7.37324	8.06545	-0.692213
218316_at	3.91648e-15	6.5601	7.31312	-0.753014								201678_s_at	2.72348e-13	7.61137	8.22291	-0.611541
208808_s_at	3.99163e-15	10.49	8.89583	1.5942								200613_at	2.73433e-13	10.9183	11.7168	-0.798568
208737_at	4.02236e-15	10.6899	9.55178	1.13814								207435_s_at	2.74279e-13	8.53457	9.68293	-1.14837
201797_s_at	4.02402e-15	6.17993	7.20506	-1.02513								201779_s_at	2.7525e-13	11.7538	10.8177	0.936143
206608_s_at	4.03981e-15	5.88423	6.63395	-0.749721								217776_at	2.75446e-13	7.97572	8.91952	-0.943798
217762_s_at	4.04713e-15	12.292	11.4821	0.809927								221700_s_at	2.7551e-13	13.6725	14.0623	-0.389785
206209_s_at	4.05482e-15	9.99061	8.12106	1.86954								201209_at	2.79728e-13	10.3375	11.0303	-0.692856
210589_s_at	4.07377e-15	9.65446	8.73091	0.923546								203988_s_at	2.79971e-13	5.63093	6.4079	-0.77697
204297_at	4.1481e-15	8.93707	8.25508	0.681991								202970_at	2.81992e-13	6.38726	7.04179	-0.654532
207163_s_at	4.27104e-15	8.79785	9.79576	-0.997913								201978_s_at	2.85711e-13	8.55787	8.98973	-0.431863
203397_s_at	4.30208e-15	8.61726	7.09973	1.51752								204391_x_at	2.86608e-13	5.95706	6.79155	-0.834491
200596_s_at	4.34737e-15	9.03725	9.71225	-0.675								209732_at	2.95092e-13	7.9673	6.54871	1.41859
209492_x_at	4.3702e-15	8.87296	7.86286	1.0101								216675_at	2.95252e-13	7.3827	6.4256	0.957096
217604_at	4.37874e-15	4.75764	5.57164	-0.814002								211986_at	2.9635e-13	9.38722	10.5713	-1.18412
203678_at	4.38229e-15	6.12037	7.09944	-0.979072								210976_s_at	2.98432e-13	6.7349	7.4351	-0.700194
57516_at	4.39199e-15	6.05564	6.60016	-0.544526								208679_s_at	2.99014e-13	13.3423	12.8615	0.480723
219104_at	4.41162e-15	8.42531	7.34052	1.08479								220691_at	3.01625e-13	6.81775	6.22708	0.590672
210874_s_at	4.48384e-15	6.54167	7.09204	-0.550368								216902_s_at	3.02446e-13	5.63568	6.45325	-0.81757
211666_x_at	4.50555e-15	11.5533	12.7634	-1.21017								217862_at	3.03844e-13	9.77391	8.91306	0.860857
202624_s_at	4.56691e-15	8.89944	10.0015	-1.10204								214439_x_at	3.16565e-13	8.6062	9.72441	-1.1182
214752_x_at	4.62259e-15	10.4852	11.3357	-0.850547								213414_s_at	3.182e-13	13.0813	13.7036	-0.622347
211563_s_at	4.65217e-15	5.78739	6.76755	-0.980161								214866_at	3.24965e-13	8.89123	7.98185	0.909376
217309_s_at	4.73311e-15	6.31281	5.736	0.576812								208527_x_at	3.33823e-13	9.27525	8.35657	0.918683
205214_at	4.76136e-15	8.63729	7.10089	1.53641								206177_s_at	3.33889e-13	9.60289	6.59099	3.0119
215263_at	4.78744e-15	3.78338	4.17433	-0.390947								201320_at	3.34138e-13	8.44012	9.22113	-0.781014
201077_s_at	4.96232e-15	9.60176	10.2068	-0.605039								209958_s_at	3.37123e-13	5.55008	6.11195	-0.561875
208159_x_at	4.97513e-15	7.74573	8.80461	-1.05888								208653_s_at	3.42416e-13	9.61302	8.53622	1.0768
210707_x_at	4.97719e-15	7.72581	8.19019	-0.464388								213693_s_at	3.4313e-13	6.4972	5.94034	0.55686
213174_at	5.00589e-15	6.77434	7.6202	-0.84586								218805_at	3.46784e-13	10.0049	11.0702	-1.06528
212206_s_at	5.0069e-15	7.40905	8.2686	-0.859547								204093_at	3.49783e-13	8.03732	7.44734	0.589989
215699_x_at	5.04978e-15	7.22247	7.8975	-0.67503								36129_at	3.525e-13	9.57744	10.1136	-0.536148
206274_s_at	5.08857e-15	5.73961	6.42303	-0.683417								208698_s_at	3.54355e-13	8.67045	9.49385	-0.823396
209196_at	5.16678e-15	6.90506	7.63921	-0.734152								203415_at	3.54485e-13	9.32112	8.87783	0.443289
216088_s_at	5.17549e-15	8.89001	8.0484	0.841611								214467_at	3.5469e-13	9.15189	7.50874	1.64316
208936_x_at	5.17645e-15	8.90024	7.89921	1.00103								213192_at	3.59639e-13	6.8953	6.57029	0.325009
213772_s_at	5.17957e-15	7.53003	8.09628	-0.566244								204552_at	3.60682e-13	7.70902	8.65348	-0.944453
213513_x_at	5.18175e-15	11.7815	11.3469	0.434599								219104_at	3.60932e-13	8.41773	7.34052	1.07721
219139_s_at	5.19422e-15	5.41291	6.11846	-0.705553								218496_at	3.64069e-13	7.25157	8.01065	-0.759085
213624_at	5.21742e-15	8.86991	6.69289	2.17702								209207_s_at	3.66343e-13	8.42341	7.52416	0.899248
200619_at	5.24079e-15	9.9592	10.564	-0.604806								206359_at	3.6914e-13	8.87853	7.0879	1.79063
218556_at	5.24608e-15	9.91204	9.25293	0.659111								208052_x_at	3.71315e-13	9.50598	8.59021	0.915775
209707_at	5.28042e-15	7.17524	5.35103	1.82421								216142_at	3.75856e-13	6.18968	5.56038	0.629302
212789_at	5.29294e-15	6.60607	7.31981	-0.713744								204790_at	3.77808e-13	5.84421	6.85959	-1.01538
203386_at	5.35505e-15	6.1336	7.67864	-1.54504								49329_at	3.81686e-13	6.87392	8.03865	-1.16473
222021_x_at	5.35768e-15	9.18615	9.56919	-0.383038								218254_s_at	3.90387e-13	7.27662	5.8035	1.47312
211754_s_at	5.43699e-15	5.77192	6.3265	-0.55458								209828_s_at	3.96952e-13	7.86964	8.82763	-0.95799
203353_s_at	5.46881e-15	9.10109	9.5293	-0.428204								214572_s_at	4.00885e-13	8.1042	6.58992	1.51429
202864_s_at	5.4917e-15	10.0851	9.2948	0.79026								209129_at	4.04648e-13	7.43485	6.68926	0.745587
213431_x_at	5.49511e-15	7.39706	8.03848	-0.641422								204377_s_at	4.06355e-13	4.98601	5.50086	-0.514849
219818_s_at	5.52025e-15	6.14537	6.95008	-0.804712								201036_s_at	4.0758e-13	5.81639	6.79912	-0.982738
201336_at	5.52835e-15	11.5469	10.8581	0.688818								209348_s_at	4.08792e-13	5.79922	7.10066	-1.30144
201422_at	5.59141e-15	13.7042	13.1439	0.560371								214876_s_at	4.09175e-13	4.55753	5.33358	-0.776057
208899_x_at	5.64079e-15	9.44377	8.31136	1.13241								212691_at	4.11065e-13	7.316	7.9346	-0.618599
209395_at	5.74119e-15	8.55914	11.5204	-2.96128								217943_s_at	4.12698e-13	9.67052	10.5224	-0.851917
214637_at	5.76568e-15	6.71938	6.01215	0.707225								215785_s_at	4.13596e-13	10.4831	11.3066	-0.823504
221566_s_at	5.83419e-15	5.86419	5.33904	0.525152								221265_s_at	4.143e-13	6.9896	7.5727	-0.583104
60528_at	5.8557e-15	7.79199	8.46063	-0.668635								209813_x_at	4.14528e-13	8.08572	9.98174	-1.89602
202437_s_at	5.87948e-15	9.58262	7.22275	2.35987								201797_s_at	4.16066e-13	6.24577	7.20506	-0.959284
208583_x_at	5.9108e-15	8.55223	7.90114	0.651091								216191_s_at	4.17298e-13	6.50256	8.73573	-2.23317
207727_s_at	5.96695e-15	7.67094	8.16413	-0.493193								218997_at	4.23577e-13	6.85103	7.33556	-0.484527
205711_x_at	6.08832e-15	9.84624	8.25724	1.589								202460_s_at	4.29162e-13	8.54078	9.50545	-0.964667
212462_at	6.09257e-15	6.81553	7.93069	-1.11516								212082_s_at	4.32857e-13	12.7701	11.714	1.05605
202726_at	6.10451e-15	6.81003	7.57533	-0.765306								212697_at	4.35269e-13	9.443	10.3352	-0.892221
217898_at	6.16214e-15	9.72817	9.27018	0.457991								207275_s_at	4.37742e-13	13.0362	11.8313	1.20497
209201_x_at	6.18616e-15	10.4699	11.8593	-1.38939								212218_s_at	4.38482e-13	6.65401	7.27872	-0.624715
207000_s_at	6.25944e-15	6.75712	7.55056	-0.793437								211300_s_at	4.39566e-13	5.70963	6.72653	-1.01689
215211_at	6.3427e-15	5.40165	6.50674	-1.1051								209906_at	4.53686e-13	10.9956	9.15187	1.84373
203210_s_at	6.35028e-15	5.02023	5.60651	-0.586282								205565_s_at	4.54351e-13	6.04195	6.87532	-0.833368
212346_s_at	6.41635e-15	6.75553	7.31236	-0.556834								214323_s_at	4.54486e-13	7.50685	8.41335	-0.906497
202064_s_at	6.4314e-15	7.15698	6.42014	0.736834								200753_x_at	4.60633e-13	8.14427	8.91529	-0.771021
202561_at	6.43873e-15	6.81956	7.66145	-0.841891								212007_at	4.6372e-13	8.92263	8.10296	0.819668
201367_s_at	6.49731e-15	7.73325	9.62493	-1.89169								202430_s_at	4.64158e-13	10.3408	8.41011	1.9307
221626_at	6.62255e-15	6.65536	7.45087	-0.795507								200097_s_at	4.67217e-13	10.251	10.9883	-0.737263
217891_at	6.75077e-15	6.67773	7.38451	-0.706779								209375_at	4.72902e-13	8.7266	9.30986	-0.583261
212178_s_at	6.76178e-15	7.64098	8.50265	-0.86167								204670_x_at	4.7383e-13	12.0836	13.1577	-1.0741
201592_at	6.79507e-15	10.8262	11.3794	-0.553145								201601_x_at	4.76387e-13	13.8372	13.1547	0.682494
221476_s_at	6.84692e-15	10.7647	11.7757	-1.01098								219443_at	4.86339e-13	4.9487	5.74668	-0.797982
209826_at	6.84887e-15	5.79769	6.35854	-0.560855								214551_s_at	4.86593e-13	7.09977	8.82468	-1.7249
216226_at	6.87204e-15	4.71423	5.2221	-0.507871								206209_s_at	4.89954e-13	9.92273	8.12106	1.80167
210768_x_at	6.91117e-15	6.83274	5.72033	1.11241								211010_s_at	4.91259e-13	6.50541	7.56061	-1.05519
205238_at	6.98084e-15	5.78194	6.22392	-0.44198								206889_at	5.01171e-13	6.96199	6.32695	0.635046
221691_x_at	6.99132e-15	8.84642	9.7989	-0.952479								204191_at	5.03338e-13	7.47582	6.53634	0.939481
207104_x_at	7.19349e-15	10.264	9.45702	0.806933								210789_x_at	5.03344e-13	9.73095	8.76784	0.963117
214881_s_at	7.24022e-15	6.07891	7.18167	-1.10277								205668_at	5.04553e-13	7.34506	8.81402	-1.46896
217763_s_at	7.26972e-15	12.2702	11.482	0.788197								56197_at	5.05118e-13	10.1537	10.9292	-0.775493
200859_x_at	7.30066e-15	10.6011	11.4519	-0.850867								204565_at	5.1204e-13	7.41169	6.66032	0.751374
221712_s_at	7.40543e-15	7.24535	7.97373	-0.728378								212609_s_at	5.12418e-13	6.42053	7.05402	-0.633488
218078_s_at	7.76415e-15	8.73272	7.76755	0.965172								211144_x_at	5.19782e-13	8.0385	9.9569	-1.91839
208675_s_at	7.94994e-15	10.2268	10.9388	-0.711992								211036_x_at	5.21093e-13	10.1118	10.6586	-0.546835
215772_x_at	7.97727e-15	6.98445	8.19041	-1.20596								217868_s_at	5.21305e-13	12.3456	10.9654	1.38022
200998_s_at	8.00785e-15	10.9511	9.702	1.24909								204348_s_at	5.27902e-13	6.07849	5.01516	1.06334
205806_at	8.07722e-15	5.73574	5.1776	0.558135								207081_s_at	5.28084e-13	8.38269	9.30373	-0.921039
202349_at	8.11074e-15	9.00276	8.34183	0.660929								209069_s_at	5.31682e-13	13.8052	13.3847	0.420574
210461_s_at	8.16359e-15	6.0443	6.69816	-0.653856								213120_at	5.46137e-13	4.9558	4.31787	0.637931
205471_s_at	8.29447e-15	7.36063	5.61845	1.74217								218521_s_at	5.52357e-13	6.84089	5.62618	1.21471
205881_at	8.34478e-15	4.97907	5.48097	-0.501904								209341_s_at	5.59432e-13	9.32507	9.96298	-0.637906
201935_s_at	8.36735e-15	8.82845	8.0282	0.800251								40837_at	5.60582e-13	6.8029	7.38583	-0.58293
220684_at	8.37511e-15	7.4829	8.74942	-1.26652								213205_s_at	5.6121e-13	7.82589	8.47792	-0.652035
217874_at	8.43036e-15	10.1409	9.61086	0.530082								201369_s_at	5.71672e-13	8.67076	10.0467	-1.37597
202804_at	8.48085e-15	8.186	8.9047	-0.718697								222293_at	5.85766e-13	5.69968	5.09764	0.602042
213159_at	8.51373e-15	9.21683	8.43727	0.779563								201516_at	5.92975e-13	7.81653	8.60599	-0.789456
219354_at	8.52098e-15	6.26907	6.9052	-0.636132								203747_at	5.95429e-13	6.62357	7.40888	-0.785309
203746_s_at	8.53433e-15	8.39328	7.85994	0.533332								207877_s_at	6.01951e-13	6.62176	7.25585	-0.63409
201660_at	8.61534e-15	8.11822	6.60335	1.51487								201767_s_at	6.09049e-13	7.14627	7.80763	-0.66136
214279_s_at	8.68922e-15	4.45043	4.94244	-0.492007								206081_at	6.14141e-13	4.84109	5.37594	-0.534847
204504_s_at	8.73248e-15	7.31087	7.99222	-0.681353								212863_x_at	6.19502e-13	10.3651	10.9922	-0.627014
213153_at	8.75281e-15	10.4618	11.0969	-0.635077								213175_s_at	6.21041e-13	10.9007	11.5019	-0.601153
208523_x_at	8.789e-15	7.39617	6.49009	0.906079								219968_at	6.23028e-13	7.48847	8.30302	-0.814543
201137_s_at	8.87534e-15	10.8475	12.224	-1.37648								215209_at	6.26729e-13	6.57395	5.62501	0.948944
213172_at	9.14517e-15	4.23462	5.02905	-0.794432								222140_s_at	6.30867e-13	6.82394	7.71689	-0.892955
201755_at	9.19871e-15	6.83257	7.5218	-0.689229								209744_x_at	6.32085e-13	7.93904	7.31843	0.620607
220692_at	9.3774e-15	6.39909	7.08075	-0.681667								221626_at	6.32538e-13	6.58125	7.45087	-0.869616
213047_x_at	9.42049e-15	9.24184	10.4268	-1.185								205202_at	6.34023e-13	9.8964	8.73203	1.16437
214467_at	9.42762e-15	9.22299	7.50874	1.71425								216983_s_at	6.42483e-13	6.16153	5.58025	0.581284
213064_at	9.84314e-15	6.38466	7.34446	-0.959798								202243_s_at	6.42839e-13	11.4155	10.8749	0.540664
211554_s_at	9.86728e-15	7.50904	6.86081	0.64823								221506_s_at	6.44303e-13	8.11329	8.72178	-0.608486
218401_s_at	9.89908e-15	8.51481	7.50298	1.01182								200098_s_at	6.61648e-13	9.84751	10.433	-0.585468
219025_at	1.01145e-14	6.09431	6.71492	-0.620605								214760_at	6.77874e-13	7.77697	8.42094	-0.64397
204774_at	1.01576e-14	9.5137	6.93988	2.57382								206966_s_at	6.77891e-13	7.2042	7.97333	-0.769123
217299_s_at	1.01761e-14	7.15301	5.79062	1.36239								218335_x_at	6.78003e-13	8.86082	8.38681	0.474008
207351_s_at	1.01788e-14	7.11878	8.22408	-1.1053								37652_at	6.79752e-13	8.92306	9.9884	-1.06534
201277_s_at	1.02538e-14	9.97724	10.6223	-0.645032								210017_at	6.83748e-13	6.1245	7.08065	-0.95615
218619_s_at	1.03281e-14	7.05964	7.58517	-0.525531								208021_s_at	6.99327e-13	6.91023	7.47918	-0.568955
204084_s_at	1.04129e-14	8.13266	7.16096	0.971701								203847_s_at	7.01834e-13	7.49795	7.92557	-0.427617
202761_s_at	1.0571e-14	7.48796	9.28613	-1.79817								205997_at	7.07168e-13	5.95725	7.2011	-1.24385
214542_x_at	1.08124e-14	7.57118	7.00603	0.56515								203692_s_at	7.12275e-13	9.18067	8.4039	0.776767
200069_at	1.08222e-14	7.70827	8.46987	-0.761601								208622_s_at	7.13681e-13	8.26932	9.1959	-0.92658
222190_s_at	1.09084e-14	6.36071	7.00612	-0.645408								208661_s_at	7.21727e-13	6.8669	7.90713	-1.04023
219632_s_at	1.10236e-14	5.10839	5.611	-0.502609								214180_at	7.49266e-13	5.88304	6.78697	-0.903926
205415_s_at	1.10741e-14	6.97559	6.21706	0.758535								213040_s_at	7.50144e-13	4.68585	5.36239	-0.676539
204321_at	1.11366e-14	5.08287	5.56519	-0.482325								212088_at	7.53324e-13	8.20333	8.91049	-0.707158
221963_x_at	1.12089e-14	6.41246	7.18695	-0.77449								210119_at	7.57675e-13	11.9924	10.6666	1.32576
213670_x_at	1.12998e-14	8.20334	9.01631	-0.812972								205544_s_at	7.62493e-13	5.08186	6.21912	-1.13726
208443_x_at	1.14582e-14	5.30479	4.57104	0.733753								217720_at	7.64879e-13	11.593	10.8337	0.759345
212395_s_at	1.14676e-14	5.77129	6.25647	-0.485171								35671_at	7.70053e-13	8.35479	8.95489	-0.600094
204168_at	1.16293e-14	8.41849	7.66886	0.749631								218267_at	7.78608e-13	5.93353	5.31058	0.622958
202522_at	1.16696e-14	9.46042	9.77771	-0.317289								202497_x_at	7.86081e-13	10.7349	9.62499	1.10995
214494_s_at	1.1781e-14	9.17357	9.83782	-0.664255								208675_s_at	7.90228e-13	10.2521	10.9388	-0.686711
214060_at	1.18686e-14	5.33473	5.9291	-0.594365								206842_at	7.9055e-13	6.11663	5.39722	0.719414
218076_s_at	1.20141e-14	8.98381	9.70153	-0.717724								203570_at	7.92906e-13	6.39773	5.26983	1.12789
203570_at	1.24702e-14	6.39511	5.26983	1.12528								201557_at	7.98388e-13	7.84222	8.62927	-0.787049
208445_s_at	1.25634e-14	7.94221	8.52552	-0.583309								217466_x_at	8.01258e-13	10.7945	11.3465	-0.551946
201377_at	1.27163e-14	7.87904	8.49115	-0.612106								202576_s_at	8.12463e-13	7.63815	8.11296	-0.474805
217905_at	1.28247e-14	8.01506	7.21624	0.798827								204219_s_at	8.13726e-13	10.2106	9.81865	0.391946
212658_at	1.29573e-14	8.84975	7.49538	1.35437								217485_x_at	8.15192e-13	7.98945	8.38937	-0.399921
214681_at	1.30957e-14	8.40949	6.68715	1.72234								220077_at	8.17648e-13	6.11525	5.69612	0.419128
212864_at	1.31063e-14	9.22701	8.52653	0.700479								201774_s_at	8.2571e-13	6.67218	7.49831	-0.826127
213674_x_at	1.31905e-14	7.14078	9.41925	-2.27847								203660_s_at	8.38442e-13	7.77446	8.52954	-0.755075
209034_at	1.32589e-14	10.9671	11.6033	-0.636211								212996_s_at	8.50026e-13	4.8217	5.44973	-0.628033
203667_at	1.33299e-14	9.37485	8.54677	0.828081								200746_s_at	8.52983e-13	11.097	11.6636	-0.566603
218670_at	1.34268e-14	6.44854	7.19935	-0.750811								201030_x_at	8.54115e-13	10.1855	11.6761	-1.49064
203128_at	1.35048e-14	8.48086	7.26634	1.21452								222297_x_at	8.62042e-13	5.89588	6.52898	-0.633098
219202_at	1.37518e-14	9.66902	8.7826	0.886421								218880_at	8.64306e-13	9.6499	8.34071	1.30919
218819_at	1.38858e-14	8.1973	7.12898	1.06832								203679_at	8.64808e-13	8.00396	7.35212	0.651835
209041_s_at	1.46312e-14	7.07177	7.58723	-0.515458								214096_s_at	8.66629e-13	9.02925	9.61868	-0.589431
210247_at	1.46671e-14	6.96624	6.00638	0.959858								204971_at	8.70348e-13	10.6122	8.45377	2.15841
201027_s_at	1.47019e-14	6.75996	7.4779	-0.717947								206114_at	8.76958e-13	5.74965	6.56092	-0.811271
221768_at	1.47591e-14	9.2721	10.1644	-0.892258								200847_s_at	8.78744e-13	10.7631	11.6019	-0.838809
220007_at	1.48418e-14	5.25207	6.01235	-0.760279								211971_s_at	8.82188e-13	7.55897	8.59683	-1.03786
36830_at	1.49571e-14	4.73839	5.12301	-0.384621								210045_at	8.99696e-13	6.732	7.3704	-0.638398
208896_at	1.50612e-14	6.87409	7.99829	-1.1242								200596_s_at	9.01162e-13	9.00792	9.71225	-0.704333
204118_at	1.5151e-14	11.65	10.676	0.97404								201957_at	9.07407e-13	7.43872	8.48185	-1.04313
210813_s_at	1.53733e-14	5.3825	4.17732	1.20518								219581_at	9.07978e-13	5.73097	6.51458	-0.783618
217846_at	1.53915e-14	10.2114	11.0068	-0.795353								221255_s_at	9.22034e-13	8.35838	7.74974	0.608642
215994_x_at	1.54188e-14	8.02182	8.4889	-0.467082								206548_at	9.22643e-13	8.35799	6.94303	1.41497
208870_x_at	1.54598e-14	10.1181	8.63027	1.48781								208336_s_at	9.22762e-13	8.33395	9.4162	-1.08226
212504_at	1.55688e-14	6.33495	6.75071	-0.415755								209299_x_at	9.23588e-13	7.39801	7.85682	-0.458814
202422_s_at	1.55829e-14	7.66556	5.79343	1.87213								208066_s_at	9.24255e-13	9.1194	8.14175	0.977646
205726_at	1.56472e-14	8.01005	7.08022	0.929832								212601_at	9.40643e-13	8.79948	9.4884	-0.688922
217329_x_at	1.56479e-14	6.53674	5.09347	1.44326								207351_s_at	9.63279e-13	7.20805	8.22408	-1.01603
215350_at	1.57789e-14	4.9884	4.06243	0.925972								212727_at	9.77944e-13	6.02362	6.3914	-0.367777
203597_s_at	1.6127e-14	6.7033	5.85781	0.845495								212254_s_at	9.79343e-13	4.54307	5.08709	-0.54402
208698_s_at	1.61301e-14	8.51882	9.49385	-0.975035								217225_x_at	9.88476e-13	10.2208	10.9754	-0.754609
212088_at	1.61967e-14	8.23135	8.91049	-0.679136								217988_at	9.9781e-13	6.69751	7.43957	-0.742055
200976_s_at	1.63868e-14	9.90682	8.66732	1.23949								202708_s_at	1.00905e-12	10.4877	9.30394	1.18375
202753_at	1.68254e-14	10.2405	9.62272	0.617744								200088_x_at	1.00921e-12	12.7394	13.3843	-0.644933
209329_x_at	1.68426e-14	10.3639	11.0637	-0.699799								221853_s_at	1.01044e-12	8.79929	9.58735	-0.788063
202250_s_at	1.70478e-14	8.14771	8.95742	-0.809706								218660_at	1.02574e-12	12.527	11.395	1.13194
208622_s_at	1.75858e-14	8.24714	9.1959	-0.948757								203800_s_at	1.0263e-12	8.65266	8.09592	0.556732
214440_at	1.75886e-14	7.1739	5.67047	1.50343								211050_x_at	1.03207e-12	6.88879	5.94261	0.946175
40189_at	1.77025e-14	9.20882	10.1303	-0.921514								200999_s_at	1.03274e-12	11.4099	10.1667	1.24313
212964_at	1.77513e-14	6.55454	7.37599	-0.821449								217188_s_at	1.0467e-12	6.32749	7.01575	-0.688258
201478_s_at	1.80262e-14	7.66538	8.52206	-0.856687								217143_s_at	1.06726e-12	7.88483	9.90736	-2.02253
209341_s_at	1.8216e-14	9.26254	9.96298	-0.700436								211931_s_at	1.07286e-12	9.34434	9.91801	-0.573672
211856_x_at	1.84436e-14	4.67086	5.07618	-0.405326								207628_s_at	1.07666e-12	8.27113	8.96972	-0.698586
211725_s_at	1.87741e-14	10.5039	9.77709	0.726793								212014_x_at	1.08059e-12	11.0076	10.0212	0.986345
212653_s_at	1.88104e-14	6.19451	7.0739	-0.879391								218957_s_at	1.08326e-12	7.27719	7.99785	-0.720657
213402_at	1.90133e-14	7.90279	7.22193	0.680858								217408_at	1.08817e-12	8.234	8.98706	-0.753057
203028_s_at	1.934e-14	13.5565	13.0018	0.55476								205790_at	1.09202e-12	7.5553	8.69335	-1.13805
212223_at	1.93403e-14	9.05677	10.0247	-0.967947								218092_s_at	1.09245e-12	9.39588	8.09263	1.30326
210742_at	1.93885e-14	5.72225	6.73396	-1.01171								216115_at	1.09281e-12	6.97422	6.12488	0.849344
203245_s_at	1.9457e-14	6.34282	7.12139	-0.77856								205147_x_at	1.0946e-12	12.5626	11.8449	0.717743
211919_s_at	1.94646e-14	10.4227	11.7787	-1.35592								210563_x_at	1.11093e-12	11.3513	10.6108	0.740514
211934_x_at	1.95792e-14	8.63611	9.95559	-1.31948								201683_x_at	1.12288e-12	8.07382	7.49611	0.577706
208619_at	1.96827e-14	9.45549	10.1822	-0.726706								205689_at	1.12437e-12	5.73424	6.46101	-0.726772
210648_x_at	1.97024e-14	12.8663	11.8465	1.01984								205806_at	1.13704e-12	5.80027	5.1776	0.622667
209438_at	1.97943e-14	7.93474	7.23904	0.695706								204617_s_at	1.14276e-12	8.08744	8.9756	-0.888166
207988_s_at	1.99415e-14	12.4546	11.9348	0.51978								208523_x_at	1.15428e-12	7.44867	6.49009	0.958584
201307_at	2.02679e-14	6.30768	7.17931	-0.871634								43977_at	1.15699e-12	8.12891	8.52174	-0.392832
204520_x_at	2.0848e-14	7.31385	8.4206	-1.10675								200738_s_at	1.16123e-12	12.9796	12.3522	0.627393
211969_at	2.09166e-14	11.3142	10.1317	1.18246								202800_at	1.16209e-12	7.05455	5.44896	1.60559
207515_s_at	2.10235e-14	6.64411	7.33031	-0.686203								212080_at	1.17685e-12	8.24694	9.14819	-0.901249
220320_at	2.13605e-14	8.63832	7.73609	0.902228								216842_x_at	1.18439e-12	6.83463	6.39039	0.444234
212247_at	2.14327e-14	7.1296	7.904	-0.7744								213653_at	1.19983e-12	6.9633	7.50936	-0.546062
211676_s_at	2.18219e-14	10.8127	9.32616	1.48655								205842_s_at	1.21803e-12	8.68584	7.28837	1.39747
221741_s_at	2.18337e-14	9.19622	9.57011	-0.373885								219799_s_at	1.21845e-12	10.3552	8.871	1.48423
218115_at	2.19042e-14	7.59766	8.47444	-0.876777								216322_at	1.24049e-12	4.08183	3.47577	0.606056
204529_s_at	2.2332e-14	5.28323	6.4044	-1.12118								203610_s_at	1.24069e-12	9.86538	9.09821	0.76717
204760_s_at	2.24978e-14	4.85739	5.43225	-0.574855								204043_at	1.24551e-12	8.32176	7.32354	0.998218
210119_at	2.25383e-14	11.8575	10.6666	1.19086								219155_at	1.2462e-12	8.78973	9.49551	-0.705774
219915_s_at	2.26551e-14	4.10474	4.73066	-0.625922								208306_x_at	1.24673e-12	12.2543	13.1697	-0.915489
214427_at	2.28313e-14	7.88241	8.62727	-0.744857								213819_s_at	1.24932e-12	6.17238	5.56088	0.611494
200869_at	2.30035e-14	12.8518	13.6496	-0.797711								201799_s_at	1.25554e-12	7.29746	7.75932	-0.461862
213366_x_at	2.30203e-14	10.0611	8.45221	1.60889								202369_s_at	1.2603e-12	7.39033	8.29484	-0.90451
201482_at	2.3337e-14	8.78414	7.87177	0.912375								218771_at	1.26276e-12	7.83234	8.64344	-0.811097
220942_x_at	2.34e-14	7.88954	8.75166	-0.862123								220865_s_at	1.26725e-12	7.09521	5.42243	1.67278
213216_at	2.34238e-14	6.08384	6.76273	-0.678893								207673_at	1.27998e-12	4.87999	4.5373	0.342694
214452_at	2.38778e-14	5.20439	4.04105	1.16334								44146_at	1.28963e-12	8.95334	9.28044	-0.3271
209236_at	2.40919e-14	7.2707	8.21171	-0.941011								212508_at	1.29613e-12	8.00676	8.89521	-0.888451
212069_s_at	2.43616e-14	7.72532	8.60399	-0.878672								213064_at	1.30522e-12	6.45292	7.34446	-0.891541
221881_s_at	2.4733e-14	6.98431	5.88881	1.0955								211370_s_at	1.31376e-12	7.14102	7.75713	-0.616113
214100_x_at	2.56691e-14	8.67737	9.42462	-0.747243								201137_s_at	1.31448e-12	10.9552	12.224	-1.26874
201898_s_at	2.58523e-14	9.79098	9.34782	0.443153								218482_at	1.32055e-12	8.03527	7.24901	0.78625
211949_s_at	2.59048e-14	5.87511	6.41603	-0.540923								214351_x_at	1.33678e-12	13.0648	13.5793	-0.51449
216525_x_at	2.59604e-14	7.87145	8.3692	-0.497742								34764_at	1.33928e-12	5.91618	6.79159	-0.875407
214949_at	2.60578e-14	8.20561	8.98556	-0.779953								201458_s_at	1.3565e-12	7.22914	8.36904	-1.1399
213600_at	2.62756e-14	6.28944	6.84674	-0.557301								218347_at	1.35979e-12	6.95902	7.43198	-0.472962
221893_s_at	2.63115e-14	6.73865	7.62403	-0.885383								211768_at	1.36017e-12	6.71206	6.0858	0.626268
220642_x_at	2.66555e-14	7.54186	8.30455	-0.762692								213313_at	1.36791e-12	8.11482	8.66138	-0.546566
200973_s_at	2.66891e-14	6.91791	7.69426	-0.776355								219893_at	1.37242e-12	7.02939	6.62079	0.4086
205015_s_at	2.67666e-14	6.37799	5.79592	0.582065								218794_s_at	1.37323e-12	8.2464	7.79804	0.448363
201313_at	2.68565e-14	6.01499	7.14188	-1.12689								205841_at	1.3843e-12	6.69606	5.40811	1.28795
217188_s_at	2.70671e-14	6.20726	7.01575	-0.808487								219979_s_at	1.3946e-12	6.51063	5.56787	0.942763
207071_s_at	2.71482e-14	6.18651	6.75655	-0.570036								202087_s_at	1.41494e-12	8.63522	7.49255	1.14267
202087_s_at	2.77345e-14	8.75469	7.49255	1.26214								207443_at	1.41924e-12	4.81769	4.21081	0.606879
209508_x_at	2.78501e-14	11.1546	10.4688	0.685775								211610_at	1.437e-12	7.95646	7.25885	0.697619
201957_at	2.78516e-14	7.44409	8.48185	-1.03776								213564_x_at	1.44965e-12	10.5757	12.0477	-1.47199
204992_s_at	2.83568e-14	5.46135	6.15003	-0.688682								214672_at	1.45391e-12	5.77006	6.51301	-0.742953
211250_s_at	2.84435e-14	9.57618	8.68594	0.890236								212957_s_at	1.45559e-12	5.48081	6.39673	-0.915919
204112_s_at	2.87015e-14	7.64954	6.15306	1.49648								218706_s_at	1.46099e-12	4.43572	5.1027	-0.666977
218048_at	2.93498e-14	8.43536	7.63937	0.795995								209234_at	1.47031e-12	8.93424	8.0027	0.931531
202467_s_at	2.94155e-14	8.40452	6.5257	1.87882								201593_s_at	1.48691e-12	8.75186	8.02828	0.723585
202224_at	2.94861e-14	9.19971	8.55844	0.641273								203746_s_at	1.4878e-12	8.41532	7.85994	0.555377
217184_s_at	2.95914e-14	5.36367	6.10522	-0.741548								203741_s_at	1.49217e-12	8.63836	9.6151	-0.97674
221895_at	2.97727e-14	9.80978	9.00766	0.802127								216380_x_at	1.49233e-12	8.78316	9.78948	-1.00632
219681_s_at	2.98368e-14	10.4438	11.3213	-0.877433								218364_at	1.49853e-12	8.37498	7.63923	0.735752
218267_at	3.01254e-14	6.07273	5.31058	0.762157								216609_at	1.51891e-12	6.41958	4.9448	1.47478
201184_s_at	3.03894e-14	9.38599	9.92499	-0.538998								210985_s_at	1.52017e-12	6.08623	5.05925	1.02698
217503_at	3.08256e-14	6.74896	5.41022	1.33874								203020_at	1.53992e-12	7.93341	9.11527	-1.18186
203823_at	3.08741e-14	9.61803	8.92793	0.690103								206968_s_at	1.55792e-12	6.00305	6.52081	-0.517762
212266_s_at	3.10709e-14	9.33716	10.8964	-1.55922								203353_s_at	1.58696e-12	9.12372	9.5293	-0.405581
203936_s_at	3.10988e-14	13.0778	11.2071	1.87077								202174_s_at	1.62677e-12	8.74916	9.35036	-0.601194
200098_s_at	3.11325e-14	9.84645	10.433	-0.586535								203112_s_at	1.62791e-12	6.56623	7.32917	-0.762948
210187_at	3.11857e-14	7.00758	5.79356	1.21403								213474_at	1.63726e-12	7.40752	8.27345	-0.865934
217964_at	3.16087e-14	7.60152	8.68603	-1.08452								211098_x_at	1.64488e-12	7.47625	6.53347	0.942787
216237_s_at	3.16468e-14	8.27402	9.16123	-0.887206								208686_s_at	1.65403e-12	8.38573	9.29477	-0.909038
204170_s_at	3.17061e-14	6.26808	4.52739	1.74069								211023_at	1.65753e-12	8.97095	9.59446	-0.623515
203820_s_at	3.17091e-14	5.68355	4.08683	1.59673								218104_at	1.66927e-12	7.13561	7.71445	-0.578836
220712_at	3.18036e-14	8.28512	7.32833	0.956795								208663_s_at	1.6927e-12	6.85773	7.96095	-1.10322
221524_s_at	3.18245e-14	9.18835	8.36346	0.824883								203061_s_at	1.73009e-12	6.34407	6.94747	-0.603396
203692_s_at	3.24608e-14	9.19742	8.4039	0.793522								209835_x_at	1.73078e-12	11.4928	10.5897	0.903141
220948_s_at	3.28649e-14	9.5279	10.1742	-0.646336								219997_s_at	1.7503e-12	7.6567	8.11905	-0.462358
217119_s_at	3.32645e-14	6.01438	6.72683	-0.712447								202408_s_at	1.75937e-12	8.00052	8.65866	-0.658134
204501_at	3.369e-14	6.45033	7.35554	-0.905216								212704_at	1.78911e-12	7.77173	8.62975	-0.85802
217885_at	3.56609e-14	8.30107	9.06928	-0.768217								221895_at	1.80793e-12	9.82148	9.00766	0.813825
218710_at	3.57861e-14	5.99262	6.78163	-0.789006								205232_s_at	1.81764e-12	6.54777	7.16753	-0.61976
35820_at	3.58443e-14	9.78896	8.53089	1.25807								220777_at	1.82009e-12	8.2795	7.41237	0.867131
222307_at	3.64756e-14	6.79447	7.77412	-0.979643								212003_at	1.82249e-12	8.75467	8.13317	0.621499
213615_at	3.67415e-14	6.2393	6.6803	-0.441								222120_at	1.83117e-12	6.06563	6.56081	-0.495183
204787_at	3.68075e-14	8.09174	6.1393	1.95244								204937_s_at	1.83955e-12	8.07242	8.79124	-0.718819
210556_at	3.69733e-14	5.60183	6.71875	-1.11692								203312_x_at	1.84729e-12	9.24907	9.62861	-0.379536
213012_at	3.70701e-14	6.32067	4.76314	1.55753								210260_s_at	1.87034e-12	8.95002	9.9873	-1.03728
220370_s_at	3.72177e-14	5.98299	6.84791	-0.864919								201024_x_at	1.87471e-12	8.61827	9.34899	-0.730725
202325_s_at	3.73362e-14	9.23936	8.17464	1.06472								205329_s_at	1.88934e-12	5.9836	5.29125	0.692349
222369_at	3.74906e-14	5.89547	6.97585	-1.08038								201060_x_at	1.88993e-12	11.243	9.51484	1.72815
218788_s_at	3.75634e-14	6.42034	7.17353	-0.753192								201742_x_at	1.90242e-12	8.30136	9.13542	-0.834053
203584_at	3.75983e-14	7.61308	6.09906	1.51402								205953_at	1.9084e-12	5.98339	6.462	-0.478613
91617_at	3.77864e-14	6.63066	7.31213	-0.681478								219275_at	1.95957e-12	6.64594	6.13862	0.507322
221528_s_at	3.80524e-14	9.93598	9.15087	0.785109								49452_at	1.97105e-12	5.15946	6.15413	-0.994665
210610_at	3.81091e-14	7.54706	6.06061	1.48645								212722_s_at	1.97601e-12	8.11626	7.23057	0.885687
201940_at	3.84838e-14	10.0247	8.68536	1.3393								209053_s_at	1.99841e-12	5.87505	6.56681	-0.691767
210858_x_at	3.86304e-14	7.16493	7.83364	-0.668715								219251_s_at	2.01124e-12	5.42616	5.9169	-0.490739
207551_s_at	3.87117e-14	10.3875	9.38329	1.00422								212481_s_at	2.01461e-12	8.17344	7.33899	0.834451
209054_s_at	3.88572e-14	6.4918	7.14806	-0.65626								200609_s_at	2.03162e-12	11.8753	12.331	-0.455633
203351_s_at	3.98927e-14	8.62908	7.62328	1.0058								33736_at	2.04482e-12	7.26255	6.61295	0.649599
203297_s_at	4.03528e-14	9.68722	10.4967	-0.809484								203082_at	2.08244e-12	7.50008	8.06131	-0.561225
220999_s_at	4.06496e-14	8.04659	9.24362	-1.19703								212715_s_at	2.11993e-12	5.54113	6.61211	-1.07098
211434_s_at	4.07812e-14	8.06075	6.80192	1.25882								208840_s_at	2.1306e-12	7.68554	8.41078	-0.72524
205644_s_at	4.09697e-14	8.13497	6.50036	1.63461								208913_at	2.13444e-12	6.79059	7.43682	-0.646233
205775_at	4.16213e-14	6.63462	7.26572	-0.631102								204173_at	2.14693e-12	6.96147	6.18345	0.778017
209893_s_at	4.17487e-14	7.13756	6.47328	0.66428								202814_s_at	2.15433e-12	7.53177	8.08926	-0.557494
220178_at	4.19057e-14	6.28049	7.17569	-0.895192								201755_at	2.19639e-12	6.90293	7.5218	-0.618871
213888_s_at	4.19199e-14	10.4299	10.9585	-0.528575								202549_at	2.19898e-12	5.36017	4.83217	0.528008
212459_x_at	4.19372e-14	6.73993	7.92319	-1.18326								207677_s_at	2.20033e-12	12.5466	11.7617	0.784913
209383_at	4.19539e-14	7.93045	7.33771	0.592747								209830_s_at	2.24989e-12	4.1494	3.76353	0.385874
218436_at	4.19659e-14	7.93626	7.21881	0.717452								213624_at	2.26443e-12	8.52984	6.69289	1.83695
209356_x_at	4.21527e-14	6.47715	5.77712	0.700028								202365_at	2.27415e-12	8.32473	9.06324	-0.738509
201484_at	4.24721e-14	9.71983	9.21167	0.508165								207286_at	2.28071e-12	4.2422	3.66864	0.573554
211316_x_at	4.32089e-14	11.5921	10.8672	0.724909								211675_s_at	2.28891e-12	6.952	8.52262	-1.57062
203867_s_at	4.32669e-14	6.39975	6.85546	-0.455706								91617_at	2.31555e-12	6.63508	7.31213	-0.677051
201941_at	4.35685e-14	10.073	8.67472	1.39832								218617_at	2.32584e-12	6.52184	7.26388	-0.742049
205110_s_at	4.36574e-14	6.67107	4.49177	2.17931								205340_at	2.32601e-12	6.90393	7.51364	-0.609715
216309_x_at	4.40754e-14	7.95889	8.42729	-0.468405								217431_x_at	2.33028e-12	4.35961	3.91837	0.441236
218496_at	4.41089e-14	7.35567	8.01065	-0.654981								209240_at	2.33337e-12	10.8443	11.7438	-0.899511
210211_s_at	4.46975e-14	10.959	9.74055	1.2185								217885_at	2.36576e-12	8.31625	9.06928	-0.753033
205407_at	4.53399e-14	4.59948	5.5287	-0.929218								209833_at	2.37177e-12	6.9873	6.53767	0.449629
218291_at	4.56248e-14	9.22434	8.68141	0.542929								221057_at	2.37807e-12	4.21183	3.75166	0.460169
202786_at	4.64061e-14	6.55336	7.68187	-1.12851								220500_s_at	2.40008e-12	5.72767	6.34037	-0.612696
218443_s_at	4.64078e-14	7.89567	8.62932	-0.733647								221476_s_at	2.41239e-12	10.876	11.7757	-0.899727
200692_s_at	4.65287e-14	7.52248	8.54044	-1.01797								214843_s_at	2.4164e-12	8.4156	7.71167	0.703926
210598_at	4.73061e-14	7.75659	6.91548	0.841105								206138_s_at	2.42179e-12	9.53965	9.96875	-0.429097
211852_s_at	4.75219e-14	5.5967	6.21737	-0.620677								217846_at	2.4679e-12	10.2139	11.0068	-0.792817
222031_at	4.80557e-14	3.49276	3.92478	-0.432014								208781_x_at	2.47806e-12	11.7234	10.5789	1.1445
203286_at	4.81613e-14	10.1397	11.1685	-1.02881								219806_s_at	2.47957e-12	10.3306	9.17009	1.16048
207824_s_at	4.8516e-14	6.18474	6.94218	-0.75744								202663_at	2.48101e-12	8.63741	9.55999	-0.922581
206011_at	4.86297e-14	11.5029	10.6836	0.819305								208546_x_at	2.48374e-12	8.76533	7.79229	0.973035
214579_at	4.98844e-14	6.58682	7.34928	-0.762463								202338_at	2.48436e-12	6.32075	5.67908	0.641665
218477_at	5.08647e-14	5.65803	6.51559	-0.857559								205745_x_at	2.48448e-12	8.65946	7.90195	0.757505
214136_at	5.09546e-14	4.27207	4.88719	-0.615114								214022_s_at	2.49475e-12	13.8157	13.2527	0.563006
213851_at	5.11284e-14	7.71582	6.8971	0.818722								211806_s_at	2.4982e-12	11.1453	9.77222	1.37312
202649_x_at	5.12295e-14	12.4653	13.1839	-0.718666								209212_s_at	2.50859e-12	7.47217	6.44915	1.02302
213926_s_at	5.16455e-14	7.26789	5.78573	1.48216								208547_at	2.51206e-12	5.20792	4.69057	0.517345
209958_s_at	5.28294e-14	5.60121	6.11195	-0.510746								217802_s_at	2.54566e-12	7.84273	9.08172	-1.239
213079_at	5.31669e-14	7.52547	7.88869	-0.363217								208907_s_at	2.55804e-12	7.42574	8.14995	-0.72421
211098_x_at	5.43051e-14	7.38484	6.53347	0.851372								219762_s_at	2.55989e-12	10.4117	11.4646	-1.05285
207556_s_at	5.57111e-14	9.57859	10.5242	-0.945634								212076_at	2.57158e-12	7.58128	8.57638	-0.995104
217947_at	5.59238e-14	12.934	12.363	0.571009								207000_s_at	2.57822e-12	6.92728	7.55056	-0.623276
213449_at	5.60593e-14	4.94601	5.37929	-0.433282								221959_at	2.58493e-12	5.86327	5.17447	0.688801
214291_at	5.72688e-14	6.78631	7.46105	-0.674735								202279_at	2.59217e-12	8.13227	6.78266	1.34962
217935_s_at	5.76555e-14	7.41587	7.89344	-0.47757								201114_x_at	2.60517e-12	10.6621	10.1224	0.539749
204790_at	5.81048e-14	5.83389	6.85959	-1.0257								219386_s_at	2.6116e-12	7.16544	5.72657	1.43887
202104_s_at	5.88824e-14	8.47961	9.29323	-0.813615								202474_s_at	2.62678e-12	7.84522	8.32314	-0.477921
209732_at	5.93291e-14	8.57981	6.54871	2.0311								202792_s_at	2.63062e-12	6.69208	7.64282	-0.95074
211861_x_at	5.93946e-14	4.06257	4.67586	-0.613293								209438_at	2.63086e-12	7.78927	7.23904	0.550235
218617_at	6.01256e-14	6.34078	7.26388	-0.923106								207375_s_at	2.6589e-12	8.29176	7.60549	0.686271
216644_at	6.01632e-14	4.73175	5.1591	-0.427355								218046_s_at	2.70706e-12	8.19641	7.6068	0.589603
203747_at	6.0522e-14	6.58563	7.40888	-0.823248								201959_s_at	2.7517e-12	10.0701	10.7762	-0.706107
[truncated: 4,118 more rows]
