# Supplementary material for: Gene Expression-Based Classifiers Identify Staphylococcus aureus Infection in Mice and Humans
Source: PLoS One. 2013 Jan 9;8(1):e48979. doi: 10.1371/journal.pone.0048979 (PMC3541361; doi:10.1371/journal.pone.0048979)
Supplement: Table S4 — Pathway analysis for the genes from pairwise comparisons in the mouse and human study. Top 50 ranked pathways from GeneGo MetaCore pathway analysis based upon p-value. Shaded text corresponds to pathways that are present in both the mouse and human response to the specified pathogen. (XLSX) [file pone.0048979.s012.xlsx]

## Sheet: Table S4
Table S4. Pathway analysis for the genes from pairwise comparisons in the mouse and human study. Top 50 ranked pathways from GeneGo MetaCore pathway analysis based upon p-value. Shaded text corresponds to pathways that are present in both the mouse and human response to the specified pathogen.
	MOUSE S. aureus VS. HEALTHY CONTROLS				HUMAN S. aureus VS. HEALTHY CONTROLS
#	Pathway	p-value		#	Pathway	p-value
1	Immune response_HMGB1/RAGE signaling pathway	1.58e-14		1	Cytoskeleton remodeling_TGF, WNT and cytoskeletal remodeling	5.449e-11
2	Immune response_T cell receptor signaling pathway	7.398e-14		2	Immune response_NFAT in immune response	1.128e-10
3	Immune response_CD28 signaling	2.752e-13		3	Cytoskeleton remodeling_Cytoskeleton remodeling	1.448e-09
4	Transcription_NF-kB signaling pathway	5.453e-13		4	Protein folding and maturation_POMC processing	1.793e-09
5	Immune response_Oncostatin M signaling via MAPK in human cells	1.235e-12		5	Immune response_IL-4 signaling pathway	1.425e-08
6	Transport_Clathrin-coated vesicle cycle	1.292e-12		6	Oxidative phosphorylation	1.47e-08
7	Signal transduction_JNK pathway	5.291e-12		7	Immune response_CD28 signaling	2.132e-08
8	Apoptosis and survival_APRIL and BAFF signaling	5.954e-12		8	Immune response_T cell receptor signaling pathway	3.895e-08
9	Immune response_Regulation of T cell function by CTLA-4	6.319e-12		9	Immune response_ICOS pathway in T-helper cell	4.509e-08
10	Immune response_ICOS pathway in T-helper cell	8.687e-12		10	Immune response_TCR and CD28 co-stimulation in activation of NF-kB	4.696e-08
11	Immune response_TCR and CD28 co-stimulation in activation of NF-kB	1.238e-11		11	Immune response_Function of MEF2 in T lymphocytes	7.121e-08
12	Immune response_IL-3 activation and signaling pathway	1.38e-11		12	Transcription_Role of heterochromatin protein 1 (HP1) family in transcriptional silencing	1.314e-07
13	Development_Flt3 signaling	2.057e-11		13	Signal transduction_Activation of PKC via G-Protein coupled receptor	1.9e-07
14	Immune response_IL-1 signaling pathway	2.057e-11		14	Signal transduction_AKT signaling	2.592e-07
15	Immune response_CD137 signaling in immune cell	3.032e-11		15	Development_TGF-beta receptor signaling	3.469e-07
16	Immune response_Oncostatin M signaling via MAPK in mouse cells	3.177e-11		16	Development_Role of HDAC and calcium/calmodulin-dependent kinase (CaMK) in control of skeletal myogenesis	4.731e-07
17	G-protein signaling_Regulation of p38 and JNK signaling mediated by G-proteins	5.863e-11		17	Immune response_BCR pathway	4.731e-07
18	Immune response_IL-17 signaling pathways	5.882e-11		18	Some pathways of EMT in cancer cells	5.508e-07
19	Reproduction_GnRH signaling	7.271e-11		19	Regulation of degradation of deltaF508 CFTR in CF	8.469e-07
20	Immune response_CD40 signaling	1.046e-10		20	Apoptosis and survival_Granzyme A signaling	9.206e-07
21	Development_TGF-beta-dependent induction of EMT via MAPK	1.299e-10		21	Immune response_NF-AT signaling and leukocyte interactions	1.157e-06
22	Development_Prolactin receptor signaling	1.394e-10		22	Apoptosis and survival_Endoplasmic reticulum stress response pathway	1.322e-06
23	Apoptosis and survival_Lymphotoxin-beta receptor signaling	4.077e-10		23	Development_WNT signaling pathway. Part 2	1.322e-06
24	Immune response_Gastrin in inflammatory response	6.023e-10		24	Immune response_Antigen presentation by MHC class I	1.666e-06
25	Development_GM-CSF signaling	6.759e-10		25	Development_PIP3 signaling in cardiac myocytes	1.83e-06
26	Immune response_Function of MEF2 in T lymphocytes	6.759e-10		26	Immune response_CD40 signaling	2.336e-06
27	Immune response_IL-22 signaling pathway	7.582e-10		27	Cytoskeleton remodeling_Regulation of actin cytoskeleton by Rho GTPases	2.684e-06
28	Immune response_CCR5 signaling in macrophages and T lymphocytes	8.591e-10		28	Immune response_IL-10 signaling pathway	3.013e-06
29	Immune response_MIF in innate immunity response	9.708e-10		29	Development_PDGF signaling via STATs and NF-kB	3.089e-06
30	Immune response_Fc epsilon RI pathway	1.267e-09		30	Immune response_Immunological synapse formation	3.575e-06
31	Immune response_Immunological synapse formation	1.357e-09		31	Immune response_IL-2 activation and signaling pathway	4.341e-06
32	Immune response_CXCR4 signaling via second messenger	1.52e-09		32	Translation _Regulation of EIF4F activity	5.37e-06
33	Chemotaxis_CXCR4 signaling pathway	1.52e-09		33	Immune response_IL-27 signaling pathway	5.439e-06
34	Immune response_MIF-mediated glucocorticoid regulation	1.684e-09		34	Immune response_Bacterial infections in normal airways	6.523e-06
35	Cytoskeleton remodeling_TGF, WNT and cytoskeletal remodeling	1.684e-09		35	Immune response_Th1 and Th2 cell differentiation	7.072e-06
36	Apoptosis and survival_Anti-apoptotic TNFs/NF-kB/Bcl-2 pathway	1.759e-09		36	Development_Leptin signaling via PI3K-dependent pathway	7.863e-06
37	Immune response_IL-15 signaling	2.137e-09		38	Development_NOTCH1-mediated pathway for NF-KB activity modulation	9.054e-06
38	Immune response_CD16 signaling in NK cells	3.117e-09		37	Immune response_CXCR4 signaling via second messenger	9.054e-06
39	Cell adhesion_Chemokines and adhesion	3.812e-09		39	CFTR folding and maturation (norm and CF)	9.764e-06
40	Cytokine production by Th17 cells in CF	4.197e-09		40	Immune response _CCR3 signaling in eosinophils	1.024e-05
41	Mucin expression in CF via TLRs, EGFR signaling pathways	4.383e-09		41	PGE2 pathways in cancer	1.138e-05
42	G-protein signaling_Ras family GTPases in kinase cascades (scheme)	4.442e-09		42	Development_IGF-1 receptor signaling	1.408e-05
43	Immune response_HMGB1/TLR signaling pathway	5.508e-09		43	Immune response_Antigen presentation by MHC class II	1.511e-05
44	Chemotaxis_Leukocyte chemotaxis	6.151e-09		44	Transport_Clathrin-coated vesicle cycle	1.673e-05
45	Apoptosis and survival_Regulation of Apoptosis by Mitochondrial Proteins	6.983e-09		45	Translation_Insulin regulation of translation	1.708e-05
46	G-protein signaling_N-RAS regulation pathway	6.983e-09		46	Signal transduction_IP3 signaling	1.734e-05
47	Immune response_NFAT in immune response	7.056e-09		47	Apoptosis and survival_nAChR in apoptosis inhibition and cell cycle progression	1.818e-05
48	Immune response_TREM1 signaling pathway	7.581e-09		48	Transcription_NF-kB signaling pathway	2.026e-05
49	Immune response_IL-27 signaling pathway	1.012e-08		49	G-protein signaling_Regulation of RAC1 activity	2.372e-05
50	Development_NOTCH1-mediated pathway for NF-KB activity modulation	1.313e-08		50	Development_GM-CSF signaling	2.517e-05
	MOUSE E. coli VS. HEALTHY CONTROLS				HUMAN E. coli VS. HEALTHY CONTROLS
#	Pathway	p-value		#	Pathway	p-value
1	Development_VEGF signaling via VEGFR2 - generic cascades	5.514e-14		1	Cytoskeleton remodeling_TGF, WNT and cytoskeletal remodeling	2.762e-10
2	Immune response_CCR5 signaling in macrophages and T lymphocytes	4.395e-13		2	Immune response_HMGB1/RAGE signaling pathway	1.154e-09
3	Immune response_CD28 signaling	6.157e-12		3	Development_EPO-induced Jak-STAT pathway	6.641e-09
4	Development_A2A receptor signaling	3.101e-11		4	Immune response_Oncostatin M signaling via MAPK in mouse cells	6.641e-09
5	Cytoskeleton remodeling_Role of PKA in cytoskeleton reorganisation	7.105e-11		5	Cytoskeleton remodeling_Cytoskeleton remodeling	7.585e-09
6	Apoptosis and survival_Granzyme B signaling	1.127e-10		6	Protein folding and maturation_POMC processing	9.877e-09
7	Immune response_Gastrin in inflammatory response	2.516e-10		7	Development_Prolactin receptor signaling	1.594e-08
8	Development_Prolactin receptor signaling	2.625e-10		8	Immune response_IL-2 activation and signaling pathway	2.285e-08
9	Immune response_HMGB1/RAGE signaling pathway	2.967e-10		9	Immune response_ICOS pathway in T-helper cell	2.479e-08
10	Apoptosis and survival_BAD phosphorylation	1.82e-09		10	Immune response_Immunological synapse formation	2.563e-08
11	Immune response_TREM1 signaling pathway	2.694e-09		11	Immune response_Oncostatin M signaling via MAPK in human cells	2.637e-08
12	Apoptosis and survival_Anti-apoptotic action of Gastrin	2.808e-09		12	Immune response_NFAT in immune response	6.404e-08
13	Cytoskeleton remodeling_TGF, WNT and cytoskeletal remodeling	3.962e-09		13	Transcription_Role of heterochromatin protein 1 (HP1) family in transcriptional silencing	8.702e-08
14	Immune response_IL-1 signaling pathway	4.269e-09		14	Immune response_T cell receptor signaling pathway	1.042e-07
15	Development_GM-CSF signaling	5.636e-09		15	Immune response_Function of MEF2 in T lymphocytes	1.95e-07
16	Immune response_Function of MEF2 in T lymphocytes	5.636e-09		16	Immune response_IL-4 signaling pathway	2.545e-07
17	Development_Growth hormone signaling via STATs and PLC/IP3	6.471e-09		18	Immune response _IFN gamma signaling pathway	2.625e-07
18	Cytoskeleton remodeling_Reverse signaling by ephrin B	9.107e-09		19	Immune response_BCR pathway	2.625e-07
19	Immune response_HMGB1 release from the cell	1.035e-08		17	Immune response_CD28 signaling	2.625e-07
20	Immune response_HMGB1/TLR signaling pathway	1.035e-08		20	Immune response_Histamine H1 receptor signaling in immune response	3.648e-07
21	Immune response_Inhibitory action of Lipoxins on pro-inflammatory TNF-alpha signaling	1.384e-08		21	Immune response_CD16 signaling in NK cells	3.869e-07
22	Blood coagulation_GPCRs in platelet aggregation	1.732e-08		22	PGE2 pathways in cancer	4.068e-07
23	Immune response_Histamine H1 receptor signaling in immune response	1.999e-08		23	Development_VEGF signaling via VEGFR2 - generic cascades	4.143e-07
24	Immune response _IFN gamma signaling pathway	2.291e-08		24	Development_Thrombopoietin-regulated cell processes	4.212e-07
25	Immune response_IL-22 signaling pathway	2.45e-08		25	Immune response_IL-4 - antiapoptotic action	5.937e-07
26	Signal transduction_cAMP signaling	2.505e-08		26	Normal and pathological TGF-beta-mediated regulation of cell proliferation	5.959e-07
27	Cell adhesion_Chemokines and adhesion	3.306e-08		27	Immune response_Th1 and Th2 cell differentiation	8.968e-07
28	Development_Flt3 signaling	3.399e-08		28	Development_TGF-beta receptor signaling	9.107e-07
29	Signal transduction_Erk Interactions: Inhibition of Erk	3.887e-08		29	Chemotaxis_CXCR4 signaling pathway	1.073e-06
30	G-protein signaling_G-Protein alpha-q signaling cascades	3.887e-08		30	Development_PIP3 signaling in cardiac myocytes	1.086e-06
31	Development_Gastrin in cell growth and proliferation	4.408e-08		31	Development_Role of HDAC and calcium/calmodulin-dependent kinase (CaMK) in control of skeletal myogenesis	1.15e-06
32	Chemotaxis_Leukocyte chemotaxis	5.034e-08		32	Immune response_Gastrin in inflammatory response	1.441e-06
33	Development_EGFR signaling pathway	5.886e-08		33	Cell adhesion_Chemokines and adhesion	1.516e-06
34	Chemotaxis_Lipoxin inhibitory action on fMLP-induced neutrophil chemotaxis	7.041e-08		34	Transcription_Role of AP-1 in regulation of cellular metabolism	1.685e-06
35	Immune response_ICOS pathway in T-helper cell	7.041e-08		35	Transcription_Sin3 and NuRD in transcription regulation	1.685e-06
36	Immune response_IL-15 signaling	7.808e-08		37	Development_Growth hormone signaling via PI3K/AKT and MAPK cascades	2.395e-06
37	Signal transduction_Activation of PKC via G-Protein coupled receptor	7.83e-08		36	Translation_Insulin regulation of translation	2.395e-06
38	Regulation of CFTR activity (norm and CF)	8.051e-08		38	Signal transduction_IP3 signaling	2.605e-06
39	Immune response_Fc gamma R-mediated phagocytosis in macrophages	9.96e-08		39	Translation _Regulation of EIF2 activity	2.783e-06
40	G-protein signaling_G-Protein alpha-12 signaling pathway	1.387e-07		40	Immune response_NF-AT signaling and leukocyte interactions	3.16e-06
41	Cell adhesion_Role of tetraspanins in the integrin-mediated cell adhesion	1.387e-07		43	Immune response_IL-12-induced IFN-gamma production	3.17e-06
42	Apoptosis and survival_HTR1A signaling	2.65e-07		42	Immune response_IL-9 signaling pathway	3.17e-06
43	Immune response_Bacterial infections in normal airways	2.65e-07		41	Immune response_Regulation of T cell function by CTLA-4	3.17e-06
44	HIV-1 signaling via CCR5 in macrophages and T lymphocytes	2.985e-07		44	Translation _Regulation of EIF4F activity	3.18e-06
45	Transcription_NF-kB signaling pathway	2.985e-07		45	Immune response_IL-15 signaling	3.323e-06
46	Immune response_CXCR4 signaling via second messenger	3.389e-07		47	G-protein signaling_N-RAS regulation pathway	3.52e-06
47	Cell adhesion_Ephrin signaling	3.443e-07		46	Immune response_IL-22 signaling pathway	3.52e-06
48	Cell adhesion_Histamine H1 receptor signaling in the interruption of cell barrier integrity	3.443e-07		48	Immune response_IL-27 signaling pathway	3.774e-06
49	Immune response_NFAT in immune response	3.604e-07		49	Apoptosis and survival_Granzyme A signaling	3.784e-06
50	Some pathways of EMT in cancer cells	3.604e-07		50	Immune response_Signaling pathway mediated by IL-6 and IL-1	3.784e-06
	MOUSE S. aureus VS. E. coli
#	Pathway	p-value
1	Cytoskeleton remodeling_TGF, WNT and cytoskeletal remodeling	4.976e-13
2	Development_IGF-1 receptor signaling	1.173e-12
3	Transport_Clathrin-coated vesicle cycle	1.269e-12
4	Development_PIP3 signaling in cardiac myocytes	2.236e-12
5	Immune response_HMGB1/RAGE signaling pathway	2.322e-12
6	Immune response_IL-15 signaling	6.071e-12
7	Immune response_IL-2 activation and signaling pathway	9.236e-12
8	Development_GM-CSF signaling	1.803e-11
9	Immune response_HMGB1/TLR signaling pathway	2.737e-11
10	Apoptosis and survival_APRIL and BAFF signaling	3.224e-11
11	Immune response_IL-3 activation and signaling pathway	3.841e-11
12	Cell adhesion_Chemokines and adhesion	4.549e-11
13	Immune response_CD40 signaling	6.236e-11
14	Signal transduction_AKT signaling	7.25e-11
15	Immune response_Gastrin in inflammatory response	8.444e-11
16	Cytoskeleton remodeling_Cytoskeleton remodeling	3.971e-10
17	Development_NOTCH1-mediated pathway for NF-KB activity modulation	5.109e-10
18	Cell cycle_Influence of Ras and Rho proteins on G1/S Transition	7.368e-10
19	Apoptosis and survival_HTR1A signaling	8.528e-10
20	Immune response_IL-1 signaling pathway	1.059e-09
21	Transcription_NF-kB signaling pathway	2.252e-09
22	Immune response_Regulation of T cell function by CTLA-4	2.267e-09
23	Immune response_IL-17 signaling pathways	4.609e-09
24	Immune response_Bacterial infections in normal airways	5.214e-09
25	Mucin expression in CF via TLRs, EGFR signaling pathways	5.214e-09
26	Development_TGF-beta-dependent induction of EMT via MAPK	6.156e-09
27	Apoptosis and survival_Anti-apoptotic TNFs/NF-kB/Bcl-2 pathway	7.984e-09
28	Development_EPO-induced Jak-STAT pathway	9.019e-09
29	Development_VEGF signaling via VEGFR2 - generic cascades	1.014e-08
30	Immune response_Histamine H1 receptor signaling in immune response	1.058e-08
31	Apoptosis and survival_Regulation of Apoptosis by Mitochondrial Proteins	1.802e-08
32	Apoptosis and survival_Endoplasmic reticulum stress response pathway	2.367e-08
33	Immune response_Oncostatin M signaling via MAPK in human cells	3.269e-08
34	Development_Role of HDAC and calcium/calmodulin-dependent kinase (CaMK) in control of skeletal myogenesis	3.789e-08
35	Development_FGFR signaling pathway	3.789e-08
36	Immune response_BCR pathway	3.789e-08
37	Development_Flt3 signaling	4.367e-08
38	Immune response_CCR5 signaling in macrophages and T lymphocytes	4.621e-08
39	Apoptosis and survival_Granzyme B signaling	7.071e-08
40	NGF activation of NF-kB	7.152e-08
41	Development_Thrombopoietin-regulated cell processes	7.348e-08
42	Apoptosis and survival_Lymphotoxin-beta receptor signaling	8.876e-08
43	Development_Growth hormone signaling via PI3K/AKT and MAPK cascades	8.876e-08
44	Development_PEDF signaling	9.684e-08
45	Development_A3 receptor signaling	9.684e-08
46	Transcription_Receptor-mediated HIF regulation	1.049e-07
47	IL-1 beta-dependent CFTR expression	1.188e-07
48	Translation _Regulation of EIF4F activity	1.201e-07
49	Immune response_ICOS pathway in T-helper cell	1.211e-07
50	Proteolysis_Role of Parkin in the Ubiquitin-Proteasomal Pathway	1.305e-07
