# Supplementary material for: Gene Expression-Based Classifiers Identify Staphylococcus aureus Infection in Mice and Humans
Source: PLoS One. 2013 Jan 9;8(1):e48979. doi: 10.1371/journal.pone.0048979 (PMC3541361; doi:10.1371/journal.pone.0048979)
Supplement: Table S5 — Genes in pathways common to murine and human responses to infection. Human genes are in the shaded cells. Murine genes are in the unshaded cells. (XLSX) [file pone.0048979.s013.xlsx]

## Sheet: Table S5
Table S5. Genes in pathways common to murine and human responses to infection. Human genes are in the shaded cells. Murine genes are in the unshaded cells.
Pairwise comparison	Pathway	Genes
S. aureus vs. Healthy	Cytoskeleton remodeling_TGF, WNT and cytoskeletal remodeling	AKT1 AKT3 ACTG1 ACTR3 ACTR3B ARPC1A ARPC2 AXIN1 CRK CSNK2A1 CSNK2B COL4A2 COL4A3 DSTN DVL1 DVL2 DVL3 PTK2 FZD3 FZD5 FZD7 GSK3B CHUK LIMK2 LAMA1 LAMC1 MYL6 MYL6B PPP1CB PPP1R12A MMP13 MKNK1 MYL12A MYL12B RPS6KA5 NCL PIK3CB PIK3R1 PIK3R3 PLAUR PPARD RHEB ROCK2 SMAD3 SOS2 TAB1 TCF7L2 TGFB1 TGFBR1 TLN2 LEF1 TCF7 TSC2 VAV1 VEGFA VCL MYC SRC MTOR CDKN2B MAPK13 MAPK14 TP53
		Akt1 Akt3 Acta2 Actb Actg1 Actn4 Actr2 Actr3 Arpc1b Arpc4 Arpc5 Axin2 Ctnnb1 Cdc42 Crk Col4a2 Dstn Dvl2 Mapk1 Fzd1 Fzd7 Grb2 Mdm2 Ppp1r12a Map3k11 Rps6ka5 Nlk Serpine1 Pak1 Plaur Ppard Pxn Rheb Rhoa Sos1 Sos2 Map3k7 Tgfbr2 Lef1 Tcf7 Vav1 Jun Myc Raf1 Eif4e Cdkn1a Mapk11 Mapk13
	Immune response_NFAT in immune response	AKT1 AKT3 BLNK CD28 CD247 CD3D CD3E CD3G CD79A CD79B PPP3CC CALM1 CALM3 FCER1A FCER1G GSK3B NFKBIA CHUK IKBKB ITPR1 ITPR3 ITK IGHV3-23 IGKC IGK@ IGL@ IGHM LAT LCK LYN HLA-DMA HLA-DMB HLA-DOA HLA-DOB HLA-DPA1 HLA-DPB1 HLA-DQA1 HLA-DQA2 HLA-DQB1 HLA-DRA HLA-DRB1 HLA-DRB3 HLA-DRB4 HLA-DRB5 NFAT5 NFATC1 NFATC3 REL RELA PIK3CB PIK3R1 PIK3R3 PRKCQ PLCG1 TRAC TRA@ TRAT1 VAV1 ZAP70
		Akt1 Akt3 Blnk Cd28 Cd247 Cd3d Cd3e Cd3g Cd79a Cd79b Cd80 Cd86 Fcer1g Ms4a2 Nfkbia Nfkbib Nfkbie Ikbkb Itpr2 Itpr3 Itk Igk Lat Lck H2-Eb2 Nfatc2 Nfatc3 Relb Nfkb2 Rel Rela Prkcq Plcg1 Lcp2 Tcrb-J Trat1 Vav1 Zap70
	Immune response_CD28 signaling	AKT1 AKT3 BAD BCL2L1 CD28 CD247 CD3D CD3E CD3G PPP3CC CALM1 CALM3 FYN GRAP2 GSK3B NFKBIA CHUK IKBKB ITPR1 ITPR3 ITK LAT LCK NFAT5 NFATC1 NFATC3 REL RELA PIK3CB PIK3R1 PIK3R3 PRKCQ PLCG1 TRAC TRA@ VAV1 ZAP70
		Akt1 Akt3 Bad Bcl2l1 Cd28 Cd247 Cd3d Cd3e Cd3g Cd80 Cd86 Fyn Grap2 Grb2 Nfkbia Nfkbib Nfkbie Ikbkb Itpr2 Itpr3 Itk Mapk8 Lat Lck Map2k4 Map2k7 Nfatc2 Nfatc3 Relb Nfkb2 Rel Rela Pak1 Prkcq Plcg1 Lcp2 Tcrb-J Vav1 Zap70 Jun
	Immune response_T cell receptor signaling pathway	CD247 CD3D CD3E CD3G CD4 RASGRP1 PPP3CC CALM1 CALM3 ELK1 FYN NFKBIA CHUK IKBKB ITPR1 ITPR3 ITK LAT LCK MALT1 HLA-DMA HLA-DMB HLA-DOA HLA-DOB HLA-DPA1 HLA-DPB1 HLA-DQA1 HLA-DQA2 HLA-DQB1 HLA-DRA HLA-DRB1 HLA-DRB3 HLA-DRB4 HLA-DRB5 NFATC1 NFATC3 REL RELA PRKCQ PLCG1 SOS2 TRAC TRA@ TRAT1 VAV1 ZAP70
		Bcl10 Card11 Cd247 Cd3d Cd3e Cd3g Cd4 Rasgrp1 Mapk1 Elk1 Fyn Grb2 Nfkbia Nfkbib Nfkbie Ikbkb Itpr2 Itpr3 Itk Lat Lck H2-Eb2 Ube2v2 Nfatc2 Nfatc3 Relb Nfkb2 Rel Rela Prkcq Plcg1 Sos1 Sos2 Lcp2 Tcrb-J Trat1 Vav1 Zap70 Fos Raf1
	Immune response_ICOS pathway in T-helper cell	AKT1 AKT3 BAD CD28 CD247 CD3D CD3E CD3G PPP3CC CALM1 CALM3 GNA15 GNB5 GNB1 GNG10 GNG3 GNG5 NFKBIA ICOS IKBKB ITPR1 ITPR3 ITK LAT LCK HLA-DMA HLA-DMB HLA-DOA HLA-DOB HLA-DPA1 HLA-DPB1 HLA-DQA1 HLA-DQA2 HLA-DQB1 HLA-DRA HLA-DRB1 HLA-DRB3 HLA-DRB4 HLA-DRB5 REL RELA PIK3CB PIK3R1 PIK3R3 PRKCQ PLCG1 TRAC TRA@ TRAT1 VAV1 ZAP70
		Akt1 Akt3 Bad Cd28 Cd247 Cd3d Cd3e Cd3g Cd80 Cd86 Cdc42 Gnb1 Gnb2 Gng12 Gng2 Gab2 Grb2 Nfkbia Nfkbib Nfkbie Ikbkb Itpr2 Itpr3 Itk Lat Lck H2-Eb2 Nfatc2 Relb Nfkb2 Rel Rela Pik3r5 Prkcq Plcg1 Lcp2 Tcrb-J Trat1 Vav1 Zap70
	Immune response_TCR and CD28 co-stimulation in activation of NF-kB	AKT1 AKT3 CD28 CD247 CD3D CD3E CD3G CD4 GRAP2 NFKBIA CHUK IKBKB ITK LAT LCK MALT1 HLA-DMA HLA-DMB HLA-DOA HLA-DOB HLA-DPA1 HLA-DPB1 HLA-DQA1 HLA-DQA2 HLA-DQB1 HLA-DRA HLA-DRB1 HLA-DRB3 HLA-DRB4 HLA-DRB5 REL RELA PIK3CB PIK3R1 PIK3R3 PRKCQ PLCG1 TRAC TRA@ VAV1 ZAP70
		Akt1 Akt3 Bcl10 Card11 Cd28 Cd247 Cd3d Cd3e Cd3g Cd4 Cd80 Cd86 Grap2 Grb2 Nfkbia Nfkbib Nfkbie Ikbkb Itk Lat Lck H2-Eb2 Ube2v2 Relb Nfkb2 Rel Rela Prkcq Plcg1 Lcp2 Tcrb-J Vav1 Zap70
	Immune response_Function of MEF2 in T lymphocytes	CABIN1 CALM1 CALM3 CAMK4 CAMKK2 CARM1 CD247 CD3D CD3E CD3G HDAC1 HDAC4 HDAC5 HDAC9 ITPR1 ITPR3 LAT LCK MAP2K5 MAP2K6 MAPK14 MEF2A MEF2B MEF2C NCOA2 PLCG1 PPP3CC PRKCA PRKCG PRKCH PRKCQ PRKCZ PRKD3 TRA@ TRAC YWHAQ ZAP70
		Cabin1 Camk4 Camkk1 Cd247 Cd3d Cd3e Cd3g Hdac4 Hdac7 Il2 Itpr2 Itpr3 Jun Lat Lck Map2k6 Map3k3 Mapk11 Mef2c Mef2d Ncoa2 Nfatc2 Nr4a1 Plcg1 Prkcd Prkce Prkcq Prkd2 Prkd3 Tcrb-J Ywhab Ywhae Ywhag Zap70
	Immune response_CD40 signaling	AKT1 AKT3 BCL2L1 CCND2 CD40LG CFLAR CHUK FAS FASLG FCER2 ICAM1 IKBKB JAK2 JAK3 LTA LYN MAP3K14 MAPK13 MAPK14 NFKBIA PIK3CB PIK3R1 REL RELA TNFAIP3 TP53 TRAF1 TRAF3IP2 TRAF5
		Akt1 Akt3 Bcl2l1 Cbl Ccl12 Cd80 Cd86 Cflar Fas Fcer2a Icam1 Ikbkb Il6 Irf1 Jak2 Jun Map2k4 Map3k14 Map3k7 Mapk11 Mapk13 Mapk8 Nfkb2 Nfkbia Nfkbib Nfkbie Ptgs2 Rel Rela Relb Smpd1 Stat3 Tnfaip3 Traf1 Traf5 Traf6
	Immune response_Immunological synapse formation	ACTG1 ACTR3 ACTR3B ARF6 ARPC1A ARPC2 CD2 CD247 CD28 CD3D CD3E CD3G CD4 CD58 CRKL CXCR4 CYTH1 DOCK2 FYN GNB1 GNB5 GNG10 GNG3 GNG5 HLA-DMA HLA-DMB HLA-DOA HLA-DOB HLA-DPA1 HLA-DPB1 HLA-DQA1 HLA-DQA2 HLA-DQB1 HLA-DRA HLA-DRB1 HLA-DRB3 HLA-DRB4 HLA-DRB5 ICAM1 ICAM2 ITPR1 ITPR3 PIK3CB PIK3R1 PIK3R3 PLCG1 RASGRP2 SKAP1 TLN2 TRA@ TRAC VAV1 VCL
		Actb Actg1 Actn4 Actr2 Actr3 Arf6 Arpc1b Arpc4 Arpc5 Cbl Cd2 Cd247 Cd28 Cd3d Cd3e Cd3g Cd4 Cd80 Cd86 Cdc42 Cxcr4 Fyn Gnb1 Gnb2 Gng12 Gng2 Grb2 H2-Eb2 Icam1 Icam2 Itgb2 Itpr2 Itpr3 Lcp2 Pik3r5 Plcg1 Rac2 Rasgrp2 Skap1 Tcrb-J Vav1
	Immune response_IL-27 signaling pathway	CD28 ICAM1 IFNGR1 IL10 IL12RB2 EBI3 IL27RA IL6ST JAK1 JAK2 REL RELA SOCS3 STAT1 TBX21 MYC
		Cd28 Icam1 Ifng Ifngr2 Il10 Il2 Ebi3 Il27ra Il6st Jak2 Relb Nfkb2 Rel Rela Pim1 Socs3 Stat1 Stat3 Itgb2 Myc
	Development_NOTCH1-mediated pathway for NF-KB activity modulation	ADAM17 HDAC1 RBBP4 RBBP7 H3F3A H3F3B HIST1H4B HIST1H4D HIST1H4E HIST1H4F HIST1H4H HIST1H4J HIST1H4K HIST2H4A HIST2H4B NFKBIA CHUK IKBKB IL1A IL1R1 JAG1 NCOR1 REL RELA MAP3K14 RBPJ SAP30 NCOR2 APH1B PSEN1 PSENEN
		Adam17 Rbbp4 H3f3b Hist1h4j Nfkbia Nfkbib Nfkbie Ikbkb Il1a Irak2 Jag1 Ncor1 Relb Nfkb2 Rel Rela Map3k14 Notch1 Rbpj Sap30 Traf6 Aph1a Aph1b Aph1c Ncstn Psen1
	Immune response_CXCR4 signaling via second messenger	AKT1 AKT3 CXCR4 FYN GNAI3 GNAZ GNB5 GNB1 GNG10 GNG3 GNG5 NFKBIA CHUK IKBKB ITPR1 ITPR3 ITK LAT LCK REL RELA PRKCQ PLCG1 ZAP70
		Akt1 Akt3 Cxcr4 Fyn Gnai1 Gnai2 Gnai3 Gnb1 Gnb2 Gng12 Gng2 Nfkbia Nfkbib Nfkbie Ikbkb Itpr2 Itpr3 Itk Lat Lck Relb Nfkb2 Rel Rela Pik3r5 Prkcq Plcb3 Plcg1 Ptk2b Lcp2 Zap70
	Transport_Clathrin-coated vesicle cycle	AP1G1 AP1S1 AP2M1 ACTG1 BIN1 SAR1A SAR1B SEC24A SEC24C SEC24D SEC31A SEC31B CLTC COPA COPB1 COPZ1 SH3GLB1 EPN1 HIP1R MYO1E NSF PIK3C3 PIK3R4 RABGEF1 RAB11A RAB4A RAB7A RAB11FIP1 STX12 STX16 STX7 STX8 PLIN3 VAMP2 VAMP4 VAMP7 YKT
		Ap1b1 Ap1g1 Ap1g2 Ap2a2 Ap2b1 Arf1 Acta2 Actb Actg1 Bin1 Sar1a Sec23b Sec24b Sec24d Cltc Cltb Arcn1 Copb1 Dab2 Eea1 Gosr1 Hip1 Hip1r Nsf Picalm Pikfyve Preb Rabgef1 Rab4b Rab5a Rab7 Rab8a Rab11fip1 Stx12 Stx16 Stx6 Stx7 Vamp2 Vamp4 Vamp8 Vti1a Vti1b Ykt6
	Transcription_NF-kB signaling pathway	AKT1 AKT3 CD28 NFKBIA IKBKAP CHUK IKBKB IL1A IL1R1 IRAK3 LY96 MYD88 REL RELA MAP3K14 PRKCQ TRAC TRA@ TNFRSF1B LTA TRADD
		Akt1 Akt3 Cd14 Cd28 Nfkbia Nfkbib Nfkbie Ikbkb Il1a Il1rap Irak2 Irak3 Lbp Ltbr Ly96 Myd88 Relb Nfkb2 Rel Rela Map3k14 Prkcq Ripk2 Tcrb-J Tlr4 Tnfrsf1a Tnfrsf1b Tnf Traf6
	Development_GM-CSF signaling	AKT1 AKT3 BAD BCL2 BCL2L1 CSF2RA CASP3 ELK1 HCK NFKBIA CHUK IKBKB JAK2 LYN REL RELA PIK3CB PIK3R1 GNB2L1 SOS2 STAT5B MYC
		Akt1 Akt3 Bad Bcl2 Bcl2l1 Ccl12 Cish Csf2ra Csf2rb Egr1 Mapk1 Elk1 Grb2 Hck Nfkbia Nfkbib Nfkbie Ikbkb Jak2 Mcl1 Relb Nfkb2 Rel Rela Pim1 Sos1 Sos2 Stat3 Fos Myc
E. coli vs. Healthy	Cytoskeleton remodeling_TGF, WNT and cytoskeletal remodeling	AKT1 AKT3 ACTG1 ARPC1A ARPC2 SERPING1 CRK CSNK2A1 CCND1 DVL2 DVL3 MAPK1 PTK2 FZD5 GRB2 GSK3B LIMK2 LAMA1 MYL6 MYL6B PPP1R12A MMP13 MKNK1 MYL12A MYL12B RPS6KA5 NCL PIK3CB PIK3R1 PIK3R3 PLAUR PPARD SMAD2 SMAD3 SOS2 SHC1 TCF7L2 TGFB1 TGFBR1 LEF1 TCF7 TSC2 VAV1 VCL WNT11 WNT8B XIAP JUN MYC SRC MTOR CDKN2B MAPK13 MAPK14 TP53
		Akt1 Akt2 Akt3 Acta2 Actb Actg1 Actr2 Arpc4 Ctnnb1 Cdc42 Crk Csnk2a1 Csnk2a2 Cfl2 Col4a2 Dock1 Dstn Dvl3 Ptk2 Foxo3 Fn1 Fzd1 Fzd3 Grb2 Chuk Limk2 Lamc1 Mdm2 Ppp1cb Ppp1r12a Map3k11 Mknk1 Myl2 Rps6ka5 Ncl Serpine1 Pik3r3 Plaur Pxn Rheb Rock1 Rock2 Smad2 Sos1 Sos2 Shc1 Map3k7 Tgfbr1 Vcl Wnt8b Wnt16 Wnt5a Jun Myc Raf1 Eif4e Mtor Cdkn1a Mapk13 Mapk14
	Immune response_HMGB1/RAGE signaling pathway	AKT1 AKT3 DIAPH1 MAPK1 PTK2 HMGB1 NFKBIA NFKBIB ICAM1 IL1A IL1B IL1RN MAPK9 KRAS MEF2A MEF2C MAP2K6 MYOG RELB PIK3CB PIK3R1 AGER TLR2 TNF JUN SRC NOS2 MAPK13 MAPK14
		Akt1 Akt2 Akt3 Cdc42 Diap1 Ptk2 Nfkbia Nfkbib Icam1 Il1a Il1b Il6 Il1rn Kras Mef2a Mef2c Map2k6 Ccl4 Relb Nfkb2 Rel Rela Serpine1 Pxn Scg2 Tlr2 Tlr4 Tnf F3 Vcam1 Jun Raf1 Mapk13 Mapk14 Rps6ka3
	Development_Prolactin receptor signaling	AKT1 AKT3 BCL2 CEBPB CREBBP CCND1 MAPK1 FYN GRB2 IRS1 JAK2 NEK3 NMI PIK3CB PIK3R1 PLCG1 PRL PTPN11 SOCS1 SOCS3 SOS2 STAT1 STAT5B SHC1 VAV1 CBL JUN MYC SRC
		Akt1 Akt2 Akt3 Bcl2 Bcl2l1 Csn2 Cebpb Nr3c1 Grb2 Jak2 Rela Socs1 Socs3 Sos1 Sos2 Stat3 Stat5a Shc1 Vav2 Cbl Jun Myc Raf1
	Immune response_ICOS pathway in T-helper cell	AKT1 AKT3 BAD CD28 CD247 CD3D CD3E CD3G PPP3CC CALM1 GNA15 GNB5 GNB1 GNG10 GNG5 GRB2 NFKBIA NFKBIB ICOS IKBKB ITPR1 ITPR2 ITPR3 ITK LAT LCK HLA-DMA HLA-DMB HLA-DOB HLA-DPA1 HLA-DPB1 HLA-DQA1 HLA-DQA2 HLA-DQB1 HLA-DRA HLA-DRB1 HLA-DRB3 HLA-DRB4 HLA-DRB5 RELB PIK3CB PIK3CG PIK3R1 PIK3R3 PRKCQ PLCG1 TRAC TRA@ VAV1 ZAP70
		Akt1 Akt2 Akt3 Cd247 Cd3g Cd80 Cd86 Cdc42 Ppp3ca Ppp3cb Gnb1 Gnb5 Gng10 Gng12 Gng13 Gngt1 Gngt2 Gab2 Grb2 Nfkbia Nfkbib Icosl Ikbkb Itpr3 Lat Lck H2-Eb2 Nfatc2 Relb Nfkb2 Rel Rela Pdpk1 Pik3r3 Pik3r5 Lcp2 Tcrb-J Trat1 Zap70
	Immune response_NFAT in immune response	AKT1 AKT3 BLNK CD28 CD247 CD3D CD3E CD3G CD79A CD79B PPP3CC CALM1 FCER1A FCER1G GSK3B NFKBIA NFKBIB IKBKB ITPR1 ITPR2 ITPR3 ITK IGHV3-23 IGKC IGK@ IGL@ IGHM LAT LCK LYN HLA-DMA HLA-DMB HLA-DOB HLA-DPA1 HLA-DPB1 HLA-DQA1 HLA-DQA2 HLA-DQB1 HLA-DRA HLA-DRB1 HLA-DRB3 HLA-DRB4 HLA-DRB5 NFAT5 NFATC1 NFATC3 RELB PIK3CB PIK3R1 PIK3R3 PRKCQ PLCG1 TRAC TRA@ VAV1 ZAP70
		Akt1 Akt2 Akt3 Cd247 Cd3g Cd79a Cd79b Cd80 Cd86 Ppp3ca Ppp3cb Ms4a2 Nfkbia Nfkbib Chuk Ikbkb Itpr3 Igk Lat Lck Lyn H2-Eb2 Nfat5 Nfatc2 Relb Nfkb2 Rel Rela Pik3r3 Lcp2 Syk Tcrb-J Trat1 Zap70
	Immune response_Function of MEF2 in T lymphocytes	CABIN1 CALM1 CAMK4 CAMKK2 CD247 CD3D CD3E CD3G HDAC1 HDAC4 HDAC9 ITPR1 ITPR2 ITPR3 JUN LAT LCK MAP2K5 MAP2K6 MAPK14 MEF2A MEF2B MEF2C NCOA2 PLCG1 PPP3CC PRKCA PRKCH PRKCQ PRKD3 TRA@ TRAC YWHAQ ZAP70
		Cd247 Cd3g Hdac2 Hdac7 Itpr3 Jun Kat2b Lat Lck Map2k5 Map2k6 Mapk14 Mapk7 Mef2a Mef2c Mef2d Ncoa2 Nfatc2 Ppp3ca Ppp3cb Prkci Prkd2 Tcrb-J Ywhab Ywhae Ywhag Ywhaq Ywhaz Zap70
	Immune response _IFN gamma signaling pathway	AKT1 AKT3 CALM1 CAMK2G CBL CEBPB CREBBP CRKL ICAM1 IFNGR1 IFNGR2 ITPR1 ITPR2 ITPR3 JAK1 JAK2 MAP2K6 MAP3K4 MAPK1 MAPK13 MAPK14 MCM5 MYC PIK3CB PIK3R1 PIK3R3 PRKCA PTPN11 SMAD7 SOCS1 SRC STAT1 STAT2
		Afap1 Akt1 Akt2 Akt3 Cebpb Crkl Icam1 Itpr3 Stat2 Jak2 Mcm5 Map2k6 Map3k4 Pdpk1 Pik3r3 Ptk2b Smad7 Socs1 Cbl Myc Cdkn1a Mapk13 Mapk14
	Immune response_CD28 signaling	AKT1 AKT3 BAD CALM1 CD247 CD28 CD3D CD3E CD3G FYN GRB2 GSK3B IKBKB ITK ITPR1 ITPR2 ITPR3 JUN LAT LCK MAPK9 NFAT5 NFATC1 NFATC3 NFKBIA NFKBIB PIK3CB PIK3R1 PIK3R3 PLCG1 PPP3CC PRKCQ RELB TRA@ TRAC VAV1 ZAP70
		Akt1 Akt2 Akt3 Bcl2l1 Cd247 Cd3g Cd80 Cd86 Chuk Grap2 Grb2 Ikbkb Itpr3 Jun Lat Lck Lcp2 Map2k4 Nfat5 Nfatc2 Nfkb2 Nfkbia Nfkbib Pik3r3 Pip5k1a Ppp3ca Ppp3cb Rel Rela Relb Tcrb-J Zap70
	Immune response_Histamine H1 receptor signaling in immune response	CALM1 GNA11 GNB1 GNB5 GNG10 GNG5 ICAM1 IKBKB ITPR1 ITPR2 ITPR3 JUN MAPK1 MAPK13 MAPK14 MAPK9 MMP1 MMP13 MMP3 MMP9 NFATC1 NFKBIA NFKBIB NOS2 PLA2G4A PLCB2 PPP3CC PRKCA TNF
		Chuk F3 Fos Gnaq Gnb1 Gnb5 Gng10 Gng12 Gng13 Gngt1 Gngt2 Icam1 Ikbkb Il6 Itpr3 Jun Mapk13 Mapk14 Mmp1a Nfkbia Nfkbib Nos3 Pla2g4a Pla2g4c Plcb1 Plcb4 Ppp3ca Ppp3cb Ppp3r1 Raf1 Rela Tnf Vcam1
	Development_VEGF signaling via VEGFR2 - generic cascades	ACTG1 AKT1 AKT3 FYN GRB2 GSK3B HSP90AA1 HSPB1 IKBKB ITPR1 ITPR2 ITPR3 JUN MAPK1 MAPK13 MAPK14 MAPKAPK2 NF1 NFATC1 NFKBIA NFKBIB NOS2 PIK3CB PIK3R1 PIK3R3 PLAUR PLCG1 PPP3CC PRKCA PRKCH PRKCQ PRKD3 PTGS1 PTK2 SH2D2A SHC1 SOS2 SRC TCF7L2 TRAP1 VCL
		Actb Actg1 Akt1 Akt2 Akt3 Cdc42 Chuk Ctnnb1 Fos Grb2 Hsp90aa1 Hsp90b1 Hspb1 Ikbkb Itpr3 Jun Mapk13 Mapk14 Mapkapk2 Nck1 Nf1 Nfkbia Nfkbib Nos3 Pak2 Pdpk1 Pik3r3 Plaur Ppp3ca Ppp3cb Prkci Prkd2 Ptgs2 Ptk2 Pxn Raf1 Rela Rock1 Shc1 Sos1 Sos2 Sphk1 Vcl
	Immune response_Gastrin in inflammatory response	AKT1 AKT3 ELAVL1 GNA11 GRB2 IKBKB IRS1 ITPR1 ITPR2 ITPR3 JUN MAP2K5 MAP2K6 MAP3K14 MAPK1 MAPK14 MAPK9 MEF2A MEF2B MEF2C MMP3 NFKBIA NFKBIB PIK3CB PIK3R1 PLCG1 PRKCA PTK2 SERPINB2 SHC1 SOS2 SRC
		Akt1 Akt2 Akt3 Chuk Cxcl1 Elavl1 Elk1 Fos Gnaq Grb2 Hbegf Ikbkb Itpr3 Jun Map2k4 Map2k5 Map2k6 Map3k14 Map3k7 Mapk14 Mapk7 Mef2a Mef2c Mef2d Nfkbia Nfkbib Pdpk1 Ptgs2 Ptk2 Raf1 Rela Serpinb2 Shc1 Sos1 Sos2 Traf6
	Cell adhesion_Chemokines and adhesion	ACTG1 AKT1 AKT3 ARPC1A ARPC2 CAV2 CCR1 CD44 CD47 CRK FLNA FLOT2 GNAI3 GNB1 GNB5 GNG10 GNG5 GRB2 GSK3B ITGA6 ITGB1 JUN LAMA1 LEF1 LIMK2 MAPK1 MMP1 MMP13 MSN MYC PIK3CB PIK3CG PIK3R1 PIK3R3 PLAUR PTEN PTK2 RAP1GAP RELB SDC2 SHC1 SOS2 SRC TCF7 TCF7L2 TRIO VAV1 VCL
		Acta2 Actb Actg1 Actr2 Akt1 Akt2 Akt3 Arpc4 Braf Cav2 Ccr1 Cd44 Cd47 Cdc42 Cfl2 Col1a2 Col4a2 Crk Ctnnb1 Cxcl3 Cxcl5 Dock1 Flot2 Fn1 Gnai1 Gnai2 Gnai3 Gnb1 Gnb5 Gng10 Gng12 Gng13 Gngt1 Gngt2 Grb2 Itgb1 Jun Lamc1 Limk2 Mmp1a Msn Myc Nfkb2 Pik3r3 Pik3r5 Plaur Pten Ptk2 Pxn Raf1 Rap1gap Rel Rela Relb Rock1 Rock2 Serpine1 Shc1 Sos1 Sos2 Thbs1 Trio Vcl
	Immune response_IL-15 signaling	ADAM17 AKT1 AKT3 BCL2 FKBP1A GRB2 IKBKB IL15RA IL2RB LCK MAP2K6 MAP3K14 MAPK1 MAPK13 MAPK14 MKNK1 MTOR MYB MYC NFKBIA NFKBIB PIK3CB PIK3R1 PLCG1 PTK2 SHC1 SOS2
		Adam17 Akt1 Akt2 Akt3 Bcl2 Bcl2l1 Chuk Eif4e Ets1 Fkbp1a Fos Gab2 Grb2 Ikbkb Il15ra Il6 Lck Map2k4 Map2k6 Map3k14 Mapk13 Mapk14 Mcl1 Mknk1 Mtor Myc Nfkbia Nfkbib Pdpk1 Plcb1 Ptk2 Raf1 Rela Rps6kb1 Shc1 Sos1 Sos2 Syk
	Immune response_IL-22 signaling pathway	BCL2 CD28 CD4 HLA-DMA HLA-DMB HLA-DOB HLA-DPA1 HLA-DPB1 HLA-DQA1 HLA-DQA2 HLA-DQB1 HLA-DRA HLA-DRB1 HLA-DRB3 HLA-DRB4 HLA-DRB5 IL10RB IL12RB2 IL2RA IL2RB JAK1 JAK2 JAK3 JUN MAPK1 MAPK13 MAPK14 MAPK9 MYC SOCS3 STAT1 STAT4 STAT5B TRA@ TRAC
		Bcl2 Bcl2l1 Cd86 Fos H2-Eb2 Il10rb Il2ra Jak2 Jak3 Jun Mapk13 Mapk14 Mcl1 Myc Socs3 Stat3 Stat5a Tcrb-J
